# Supplementary material
Source: publisher site journal article supplement (https://mycokeys.pensoft.net/article/4852/download/suppl/34/)
Supplement: Supplementary file 1

## Sheet: Sheet1
Table 4. The ITS1 data set.
Ph	Cl	O	F	Gen	lifestyle	Group	ITS1F_G2653	ITS1F_G2655	ITS1F_G2655_ArcRM	ITS1F_G2657	ITS1F_G2658	ITS1F_G2658_ArcRM	ITS1F_G2659	ITS1F_G2660	ITS1F_G2662	ITS1F_G2664	ITS1F_G2666	ITS1F_G2667	ITS1F_G2669	ITS1F_G2674	ITS1F_G2675	ITS1F_G2677	ITS1F_G2678	ITS1F_G2679	ITS1F_G2700	ITS1F_G2728	ITS1F_G2729	ITS1F_G2732	ITS1F_G2733	ITS1F_G2734	ITS1F_G2735	ITS1F_G2736	ITS1F_G2739	ITS1F_G2742	ITS1F_S162	ITS1_G2653	ITS1_G2655	ITS1_G2655_ArcRM	ITS1_G2657	ITS1_G2658	ITS1_G2658_ArcRM	ITS1_G2659	ITS1_G2660	ITS1_G2662	ITS1_G2664	ITS1_G2666	ITS1_G2667	ITS1_G2669	ITS1_G2674
Basidiomycota	Agaricomycetes	Russulales	Russulaceae	Russula	EcM	ITS1_00001	10	6	0	22	10	0	3	9	4	7432	14413	6754	6679	10	11	15	0	0	0	0	0	0	0	0	0	1	0	0	0	2	0	0	7	4	0	3	0	0	1331	2708	1100	1048	2
Basidiomycota	Agaricomycetes	Boletales			EcM	ITS1_00002	5	1	0	4	1	0	5011	5	0	7	2	4	4	135	5725	4	0	0	0	0	0	0	0	0	0	0	0	1	0	3	0	0	1	5	0	3761	2	0	1	0	0	0	62
Basidiomycota	Agaricomycetes	Russulales	Russulaceae	Russula	EcM	ITS1_00003	2	1	0	11	1	0	0	0	1	3962	2436	5302	1516	3	4	5	0	0	0	0	0	0	0	0	0	0	0	0	0	0	0	0	1	0	0	2	0	0	188	294	269	189	0
Basidiomycota	Agaricomycetes	Russulales	Russulaceae	Russula	EcM	ITS1_00004	7	2	2	7	4862	3379	1	4	0	1	2	3	1	2	1	1	3	8	1	0	2	0	12	11	3	4	0	11	4	0	0	0	1	1648	470	1	0	0	0	0	0	0	0
Basidiomycota	Agaricomycetes	Russulales	Russulaceae	Russula	EcM	ITS1_00005	0	0	0	0	0	0	0	0	1	245	470	320	249	0	0	1	0	0	0	0	0	0	0	0	0	0	0	0	0	1	0	0	6	3	0	2	4	1	1829	4269	1429	1587	2
Mucoromycota	Mucoromycetes	Mucorales	Cunninghamellaceae	Gongronella	NM	ITS1_00006	0	0	0	0	0	0	0	0	43	0	0	0	0	0	0	0	0	0	0	0	0	0	0	0	0	0	0	0	0	1	0	0	4	13	7	1	2	9805	2	0	0	0	0
Ascomycota	Sordariomycetes	Hypocreales	Hypocreaceae	Trichoderma	NM	ITS1_00008	23	14	7	185	18	12	178	34	1989	1063	201	375	16	42	63	4	1085	78	1	5	0	331	39	101	761	874	905	73	0	0	0	1	4	0	0	0	0	1	0	0	0	0	0
Basidiomycota	Agaricomycetes	Agaricales	Cortinariaceae	Cortinarius	EcM	ITS1_00009	0	0	0	0	1	0	0	0	0	0	0	0	0	0	0	0	0	3	1	4332	43	0	4	0	0	2	0	2	1	0	0	1	0	0	0	0	0	0	0	0	0	0	0
Basidiomycota	Agaricomycetes	Atheliales	Atheliaceae		EcM	ITS1_00010	0	0	3	0	0	4	0	0	0	1	0	0	0	0	0	0	2	2	2	1	1	1	4	4940	42	3	0	2	1	0	0	0	0	0	0	0	0	0	0	0	0	0	0
Basidiomycota	Agaricomycetes	Russulales	Russulaceae	Russula	EcM	ITS1_00011	0	0	1	0	0	0	0	0	0	0	0	0	0	0	0	0	0	5	0	0	0	0	0	0	0	0	0	6	4642	0	0	0	0	0	0	0	0	0	0	0	0	0	0
Basidiomycota	Agaricomycetes	Agaricales	Cortinariaceae	Cortinarius	EcM	ITS1_00013	0	0	2	0	0	1	0	0	0	0	0	0	0	0	0	0	2	5	1	4401	712	1	7	1	1	3	0	6	1	0	0	0	0	0	0	0	0	0	0	0	0	0	0
Basidiomycota	Agaricomycetes	Agaricales			NM	ITS1_00014	0	0	0	0	0	0	0	0	0	0	0	0	0	0	33	0	0	0	0	0	0	0	0	0	0	0	0	0	0	0	0	0	1	1	0	1	1	0	1	0	1	2	1
Basidiomycota	Agaricomycetes	Agaricales			NM	ITS1_00015	0	0	0	1	0	0	0	0	0	1	0	0	0	1	4925	0	0	0	0	0	0	0	0	0	0	0	0	0	0	0	0	0	0	0	0	0	0	0	0	0	0	0	0
Basidiomycota	Agaricomycetes	Agaricales	Hygrophoraceae	Hygrocybe	NM	ITS1_00016	4	1	0	4	2	0	0	4631	0	2	1	2	3	1	3	3	0	0	0	0	0	0	0	0	0	0	0	0	0	0	0	0	0	0	0	0	178	0	0	0	0	0	0
Ascomycota	Eurotiomycetes	Eurotiales	Trichocomaceae	Penicillium	NM	ITS1_00018	0	0	0	1	0	1	0	0	1	0	0	0	129	0	1	1	138	3	4	3	1	750	5	4	2044	1	2	3	3	0	0	0	0	0	0	0	0	0	1	0	0	14	0
Basidiomycota	Agaricomycetes	Agaricales			NM	ITS1_00019	5	3	0	4	1	0	2	1844	1	2	1	0	1	2	1	1	0	0	0	0	0	0	0	0	0	0	0	0	0	1	0	0	0	0	0	1	2598	0	1	0	1	0	2
Basidiomycota	Agaricomycetes	Agaricales	Amanitaceae	Amanita	EcM	ITS1_00021	0	1	0	0	1	0	0	1	0	38	87	3155	1	2	3	3	0	0	0	0	0	0	0	0	0	0	0	0	0	0	0	0	2	0	0	0	0	0	11	42	618	0	0
Basidiomycota	Agaricomycetes	Russulales	Russulaceae	Russula	EcM	ITS1_00022	0	1	1	0	0	0	0	0	0	0	0	0	0	0	0	0	320	1745	2	1	0	1	1	5	0	894	1	17	19	0	0	0	0	0	0	0	0	0	0	0	0	0	0
Basidiomycota	Agaricomycetes	Agaricales	Inocybaceae	Inocybe	EcM	ITS1_00023	0	0	0	0	0	0	15	2	0	0	0	0	0	0	1831	0	0	0	0	0	0	0	0	0	0	0	0	0	0	0	0	0	0	0	0	11	0	0	0	0	0	0	0
Basidiomycota	Agaricomycetes	Russulales	Russulaceae	Russula	EcM	ITS1_00024	0	0	0	3370	4	0	1	5	2	3	0	1	0	3	1	1	0	0	0	0	0	0	0	0	0	0	0	0	0	0	0	0	241	0	0	0	0	1	0	0	0	1	2
Ascomycota	Sordariomycetes	Hypocreales	Clavicipitaceae		NM	ITS1_00025	2	0	0	0	0	2	0	0	0	0	0	0	47	0	0	0	1558	2	1	1	0	127	67	1	77	153	1522	40	2	0	0	0	0	0	0	0	0	0	0	0	0	0	0
Ascomycota	Eurotiomycetes	Eurotiales	Trichocomaceae	Penicillium	NM	ITS1_00026	3	0	0	27	29	0	0	270	61	1861	106	18	6	0	1	4	346	0	3	0	0	50	3	0	5	3	128	1	3	0	0	0	1	6	0	0	206	1	77	54	7	0	0
Basidiomycota	Agaricomycetes	Russulales	Russulaceae	Russula	EcM	ITS1_00027	0	0	0	1	2	0	0	1	0	0	0	2	2489	1	1	3	0	0	0	0	0	0	0	0	0	0	0	0	0	0	0	0	6	2	0	0	1	0	0	2	0	746	1
Ascomycota	Sordariomycetes	Hypocreales	Hypocreaceae	Trichoderma	NM	ITS1_00028	4	0	1	22	10	10	73	6	320	3	1	2	0	4	49	1	43	0	0	0	0	162	13	200	1796	208	284	45	1	0	0	0	0	0	0	0	0	0	0	0	0	0	0
Basidiomycota	Agaricomycetes	Cantharellales	Clavulinaceae		EcM	ITS1_00029	0	0	0	0	0	0	0	0	0	26	1	3180	0	1	1	4	0	0	0	0	0	0	0	0	0	0	0	0	0	1	0	0	0	0	0	0	0	0	0	0	42	0	0
Basidiomycota	Agaricomycetes	Thelephorales	Thelephoraceae		EcM	ITS1_00031	0	1	0	0	0	0	2	2	71	1	0	1	0	0	2562	0	0	0	0	0	0	0	0	0	0	0	0	0	0	0	0	0	1	1	0	5	0	23	0	0	0	0	0
Basidiomycota	Agaricomycetes	Cantharellales	Cantharellaceae		EcM	ITS1_00032	0	0	0	0	0	0	0	0	0	0	0	0	0	0	0	0	3	1600	3	1	1	148	482	1	17	15	4	26	1	0	0	0	0	0	0	0	0	0	0	0	0	0	0
Basidiomycota	Agaricomycetes	Agaricales	Inocybaceae	Inocybe	EcM	ITS1_00033	0	0	0	0	0	0	149	1	0	1	1	0	1	0	1155	1	0	0	0	0	0	0	0	0	0	0	0	0	0	0	0	0	1	1	0	259	4	0	1	0	0	0	1
Ascomycota	Eurotiomycetes	Eurotiales	Trichocomaceae	Paecilomyces	NM	ITS1_00034	1	218	102	36	0	0	0	0	0	0	0	0	0	0	0	1	209	16	0	0	2	153	8	2	926	899	403	11	1	0	0	1	1	0	0	0	0	0	0	0	0	0	0
Basidiomycota	Agaricomycetes	Russulales	Russulaceae	Lactifluus	EcM	ITS1_00035	0	1	1	2	0	2	0	614	0	2	0	3	1	1	0	0	1	5	3	0	1	1172	51	3	28	2	3	772	4	0	0	0	0	1	0	0	163	0	0	0	0	0	0
Basal lineages7	Fungi_other				NM	ITS1_00036	2	1	0	1	7	0	0	276	0	39	395	219	11	3	1	2	0	0	0	0	0	0	0	0	0	0	0	0	0	0	0	0	1	4	0	0	16	0	385	1008	420	23	0
Basidiomycota	Agaricomycetes	Russulales	Russulaceae	Russula	EcM	ITS1_00039	2	0	0	1450	1	0	0	1	1	0	1	1	1	0	1	1	0	0	0	0	0	0	0	0	0	0	0	0	0	0	0	0	1185	0	0	0	1	0	0	0	0	1	0
Basidiomycota	Agaricomycetes	Russulales	Russulaceae	Russula	EcM	ITS1_00041	0	0	0	0	0	1	0	0	0	0	0	0	0	0	0	0	0	0	1	1385	1	0	0	1	0	0	1	0	0	0	0	0	0	0	0	0	0	0	0	0	0	0	0
Basidiomycota	Agaricomycetes	Cantharellales	Cantharellaceae		EcM	ITS1_00042	0	0	0	0	0	0	0	0	0	0	0	0	0	0	0	0	3	4	0	3	0	137	1043	1	9	0	2	161	1	0	0	1	0	0	0	0	0	0	0	0	0	0	0
Basidiomycota	Agaricomycetes	Russulales	Russulaceae	Gymnomyces	EcM	ITS1_00043	1	1	0	1206	1	0	0	2	0	1	1	0	2	2	1	3	0	0	0	0	0	0	0	0	0	0	0	0	0	0	0	0	1291	1	0	0	0	0	0	0	0	1	0
Basidiomycota	Agaricomycetes	Russulales	Russulaceae		EcM	ITS1_00045	0	0	1	0	0	0	0	0	0	0	0	0	0	0	0	0	2	5	3	924	909	1	2	2	1	1	2	2	0	0	0	1	0	0	0	0	0	0	0	0	0	0	0
Ascomycota	Sordariomycetes	Hypocreales	Hypocreaceae	Trichoderma	NM	ITS1_00046	259	263	74	305	117	85	6	12	1054	72	140	47	2	2	0	0	2	1	0	0	1	2	0	0	9	1	0	1	0	0	0	0	0	0	0	0	0	0	0	0	0	0	0
Basidiomycota	Agaricomycetes	Thelephorales	Bankeraceae	Boletopsis	EcM	ITS1_00047	0	0	0	0	0	0	0	0	0	0	0	0	0	0	0	0	0	2	1	0	0	0	0	1	0	1538	21	6	5	0	0	0	0	0	1	0	0	0	0	0	1	0	0
Basidiomycota	Agaricomycetes	Agaricales	Cortinariaceae	Cortinarius	EcM	ITS1_00048	0	0	0	0	0	1	0	0	0	0	0	0	0	0	0	0	1	232	0	0	0	40	986	4	1	0	2	0	2	0	0	0	0	0	0	0	0	0	0	0	0	0	0
Basidiomycota	Agaricomycetes	Agaricales	Cortinariaceae	Cortinarius	EcM	ITS1_00049	0	0	1	0	0	0	0	0	1	0	0	0	0	0	0	0	4	3	1	0	1	0	2357	2	3	1	1	5	2	0	0	0	0	0	0	0	0	0	0	0	0	0	0
Basidiomycota	Agaricomycetes	Thelephorales	Thelephoraceae		EcM	ITS1_00050	2	1	0	0	2	0	0	0	0	0	1	3	2	2029	8	0	0	0	0	0	0	0	0	0	0	0	0	0	0	0	0	0	3	0	0	0	2	0	0	0	0	1	287
Basidiomycota	Wallemiomycetes	Geminibasidiales	Geminibasidiaceae	Geminibasidium	NM	ITS1_00051	19	0	1	10	101	75	1	58	0	7	80	15	5	0	0	0	6	25	0	0	0	0	19	1	0	9	82	176	1	50	0	1	66	95	27	1	62	4	205	602	321	33	1
Basidiomycota	Agaricomycetes	Thelephorales	Thelephoraceae	Tomentella	EcM	ITS1_00052	3	0	0	2	0	0	216	1	243	1	1	1	2	303	807	1	0	0	0	0	0	0	0	0	0	0	0	0	0	1	0	0	3	0	0	81	0	117	0	0	1	1	117
Ascomycota	Eurotiomycetes	Eurotiales	Trichocomaceae	Penicillium	NM	ITS1_00053	2	0	0	1	0	0	1	2	5	448	345	0	1	3	0	0	0	0	0	0	0	0	0	0	0	0	0	0	0	0	0	0	0	1	0	0	1	8	864	595	2	0	2
Basidiomycota	Agaricomycetes	Gomphales	Gomphaceae	Ramaria	EcM	ITS1_00055	0	0	0	0	0	0	0	0	0	0	0	0	0	0	0	0	0	0	0	0	0	0	0	0	0	1	0	232	2	0	0	0	0	0	0	0	0	0	0	0	0	0	0
Basidiomycota	Agaricomycetes	Russulales	Russulaceae	Russula	EcM	ITS1_00056	0	0	0	0	0	0	0	0	0	0	0	0	0	0	0	0	0	2	0	0	2	0	0	2	1	2	1	1719	8	0	0	0	0	0	0	0	0	0	0	0	0	0	0
Ascomycota	Eurotiomycetes	Eurotiales	Trichocomaceae	Penicillium	NM	ITS1_00058	0	0	0	0	0	0	0	0	0	0	0	0	4	0	0	0	587	0	1	0	0	159	0	1	1	0	2	0	1	0	0	0	0	0	0	0	0	0	0	0	0	6	0
Basidiomycota	Agaricomycetes	Cantharellales	Clavulinaceae	Clavulina	EcM	ITS1_00059	0	0	0	1	579	362	1	2	0	1	1	2	0	0	0	1	1	0	1	1	0	0	3	0	1	2	0	1	0	0	0	0	0	844	222	0	2	0	0	1	1	0	0
Basidiomycota	Agaricomycetes	Agaricales	Cortinariaceae	Cortinarius	EcM	ITS1_00061	0	0	0	0	0	1	0	0	0	0	0	0	0	0	0	0	7	6	5	106	1871	2	5	3	1	0	1	3	2	0	0	0	0	0	0	0	0	0	0	0	0	0	0
Ascomycota	Eurotiomycetes	Eurotiales	Trichocomaceae	Eupenicillium	NM	ITS1_00062	0	0	0	0	2	0	4	1	33	956	58	1	2	0	0	2	125	1	0	1	0	60	7	2	385	1	62	1	0	0	0	0	0	0	0	0	0	3	55	9	0	1	0
Basidiomycota	Agaricomycetes	Agaricales	Strophariaceae	Psilocybe	NM	ITS1_00063	2	0	0	1	664	571	0	1	0	0	1	0	0	2	0	1	0	2	4	0	1	1	5	2	0	0	0	1	3	0	0	0	1	549	165	0	1	0	0	0	0	0	1
Basidiomycota	Agaricomycetes	Agaricales	Marasmiaceae	Marasmius	NM	ITS1_00064	2	0	0	2	0	0	0	0	0	0	0	1	1	0	932	0	0	0	0	0	0	0	0	0	0	0	0	0	0	0	2	0	0	1	0	2	0	0	0	0	0	1	0
Basidiomycota	Agaricomycetes	Agaricales	Cortinariaceae	Cortinarius	EcM	ITS1_00065	0	0	0	0	0	2	0	0	0	0	0	0	0	0	0	0	3	4	3	1	1882	1	11	6	0	0	0	8	3	0	0	0	0	0	0	0	0	0	0	0	0	0	0
Basidiomycota	Agaricomycetes	Agaricales	Agaricaceae		NM	ITS1_00066	0	0	0	0	0	0	0	0	0	0	0	0	0	1	0	0	0	0	0	0	0	0	0	0	0	0	0	0	0	0	0	0	1	1	0	0	1	0	1	1	1	1	1911
Basidiomycota	Agaricomycetes	Russulales	Russulaceae	Russula	EcM	ITS1_00067	5	0	1	6	852	572	1	127	0	0	1	0	0	1	0	0	2	8	0	1	0	1	1	4	2	0	1	2	0	1	0	0	1	233	67	0	27	0	0	0	0	0	0
Basidiomycota	Agaricomycetes	Russulales	Russulaceae		EcM	ITS1_00068	0	0	0	0	1	0	24	0	0	0	2	2	0	1054	1	0	0	0	0	0	0	0	0	0	0	0	0	1	0	3	0	0	17	6	0	43	0	0	1	0	1	4	749
Basidiomycota	Agaricomycetes	Russulales	Russulaceae	Russula	EcM	ITS1_00069	0	0	0	930	1	0	1	0	0	0	1	0	1	2	0	0	0	0	0	0	0	0	0	0	0	0	0	0	0	0	0	0	973	0	0	0	1	0	0	0	0	1	0
Basidiomycota	Agaricomycetes	Agaricales	Strophariaceae	Hebeloma	EcM	ITS1_00070	0	0	0	1	0	0	8	1	3	0	2	4	1	582	4	1	0	2	0	1	0	27	5	462	1	0	1	1	0	0	0	0	0	1	0	10	3	0	0	0	0	1	403
Basidiomycota	Agaricomycetes	Russulales	Russulaceae	Russula	EcM	ITS1_00071	0	0	0	0	0	0	0	0	0	0	0	0	0	0	0	0	13	1184	0	0	0	0	0	1	0	0	1	0	0	0	0	0	0	0	0	0	0	0	0	0	0	0	0
Basidiomycota	Agaricomycetes	Trechisporales	Hydnodontaceae	Trechispora	NM	ITS1_00072	0	2	0	1	0	0	0	0	0	6	0	941	15	0	1	1	0	0	0	0	0	0	0	0	0	0	0	0	0	1	0	0	0	1	0	0	4	0	12	0	821	14	1
Basidiomycota	Agaricomycetes	Agaricales	Agaricaceae		NM	ITS1_00073	0	0	0	0	0	0	0	0	0	0	0	0	0	1804	2	1	0	0	0	0	0	0	0	0	0	0	0	0	0	0	0	0	0	0	0	0	0	0	0	0	0	0	9
Basal lineages7	Fungi_other				NM	ITS1_00074	1	0	0	0	2	1	0	0	0	0	2	0	0	0	0	0	0	0	0	0	0	0	0	0	0	0	0	0	0	4	0	0	51	14	3	0	680	0	141	287	464	39	0
Basidiomycota	Agaricomycetes	Russulales	Russulaceae	Russula	EcM	ITS1_00075	0	0	0	0	0	0	0	0	0	0	0	0	0	0	0	0	1	1	0	0	0	0	0	0	0	0	1	8	1434	0	0	0	0	0	0	0	0	0	0	0	0	0	0
Basidiomycota	Agaricomycetes	Agaricales	Tricholomataceae	Tricholoma	EcM	ITS1_00076	0	0	0	0	0	0	0	0	0	0	0	0	0	0	0	0	0	1	0	0	0	0	1	1	1	566	116	52	5	0	0	1	0	0	0	0	0	0	0	0	0	0	0
Basidiomycota	Agaricomycetes	Agaricales	Inocybaceae	Inocybe	EcM	ITS1_00077	0	0	0	0	0	0	0	0	0	0	0	0	0	0	1	0	0	0	1	0	0	0	0	0	0	0	0	2	1557	0	0	0	0	0	0	0	0	0	0	0	0	0	0
Basidiomycota	Agaricomycetes	Agaricales	Cortinariaceae	Cortinarius	EcM	ITS1_00078	0	0	1	0	0	0	0	0	0	0	0	0	0	0	0	0	1	0	1	1	2	1	1568	5	4	0	1	1	1	0	0	0	0	0	0	0	0	0	0	0	0	0	0
Basal lineages7	Fungi_other				NM	ITS1_00079	0	0	0	0	0	0	0	0	0	0	0	0	0	0	0	0	0	0	0	0	0	0	0	0	0	0	0	0	0	27	1	0	8	70	12	0	551	0	198	552	167	32	0
Basidiomycota	Agaricomycetes	Russulales	Russulaceae	Russula	EcM	ITS1_00081	0	0	0	0	0	0	0	0	0	0	0	0	0	0	0	0	3	2	0	0	1	0	0	0	0	1007	2	40	16	0	0	0	0	0	0	0	0	0	0	0	0	0	0
Basidiomycota	Agaricomycetes	Trechisporales			NM	ITS1_00083	0	0	0	1	478	323	0	0	15	0	0	1	0	2	1	0	1	0	1	0	1	0	0	0	0	0	0	0	0	0	0	0	0	604	157	0	1	8	0	0	0	0	1
Basidiomycota	Agaricomycetes	Atheliales	Atheliaceae	Byssocorticium	EcM	ITS1_00084	0	0	0	0	0	1	0	0	0	0	0	0	0	0	0	0	17	1319	0	41	0	0	1	1	0	0	3	1	2	0	0	1	0	0	0	0	0	0	0	0	0	0	0
Ascomycota	Sordariomycetes	Hypocreales	Hypocreaceae	Trichoderma	NM	ITS1_00085	0	7	1	2	0	1	1	0	30	17	1	6	1	1	0	6	191	16	0	0	0	384	40	5	114	148	563	52	1	0	0	0	0	0	0	0	0	0	0	0	0	0	0
Basidiomycota	Agaricomycetes	Russulales	Lachnocladiaceae	Vararia	NM	ITS1_00086	650	0	0	1	0	0	0	0	0	1	1	0	1	0	0	0	0	0	0	0	0	0	0	0	0	0	0	0	0	885	0	0	0	0	0	0	0	0	0	0	1	0	0
Mortierellomycota	Mortierellomycetes	Mortierellales	Mortierellaceae	Mortierella	NM	ITS1_00088	1	0	0	0	0	0	0	1	0	0	0	0	1	0	836	1	0	0	0	0	0	0	0	0	0	0	0	0	0	0	0	0	1	0	0	0	0	0	0	0	0	1	1
Basidiomycota	Agaricomycetes	Agaricales	Agaricaceae	Agaricus	NM	ITS1_00089	0	0	0	0	0	0	0	0	0	0	0	0	0	0	0	0	0	0	0	0	0	0	0	0	0	0	0	0	0	0	0	0	1515	0	0	0	1	0	0	0	0	0	2
Basidiomycota	Agaricomycetes	Agaricales	Inocybaceae		EcM	ITS1_00090	2	0	0	3	0	0	0	702	0	0	0	1	0	1	0	1	0	0	0	0	0	0	0	0	0	0	0	0	0	0	1	0	0	2	0	0	801	0	0	0	0	0	0
Basidiomycota	Agaricomycetes	Agaricales	Cortinariaceae	Cortinarius	EcM	ITS1_00091	0	0	0	0	0	0	0	0	0	0	0	0	0	0	0	0	0	0	0	0	0	0	0	0	0	0	0	0	0	0	0	0	0	0	0	0	0	1	0	0	0	0	0
Basidiomycota	Agaricomycetes	Russulales	Russulaceae	Lactifluus	EcM	ITS1_00092	0	0	0	0	0	1	0	0	0	0	0	0	0	0	0	0	3	3	0	0	0	1012	22	0	3	1	0	298	0	0	0	0	0	0	1	0	0	0	0	0	0	0	0
Basidiomycota	Agaricomycetes	Russulales	Russulaceae	Russula	EcM	ITS1_00093	0	0	0	0	0	2	0	0	0	0	0	0	0	0	0	0	440	919	1	0	1	0	0	1	1	34	74	6	1	0	0	0	0	0	0	0	0	0	0	0	0	0	0
Basidiomycota	Agaricomycetes	Agaricales	Inocybaceae	Inocybe	EcM	ITS1_00094	1	0	0	3	0	0	77	1	1164	1	0	1	2	1	0	2	0	0	0	0	0	0	0	0	0	0	0	0	0	0	0	0	0	0	0	14	0	204	0	0	0	0	0
Basidiomycota	Agaricomycetes	Cantharellales	Cantharellaceae		EcM	ITS1_00095	0	0	0	0	0	0	0	0	0	0	0	0	0	0	0	0	0	1	0	293	248	0	0	1	0	0	3	59	0	0	0	0	0	0	0	0	0	0	0	0	0	0	0
Basidiomycota	Agaricomycetes	Agaricales	Marasmiaceae	Marasmiellus	NM	ITS1_00096	0	0	0	1	0	0	0	1	0	0	0	2	0	1	1388	2	0	0	0	0	0	0	0	0	0	0	0	0	0	0	0	0	0	0	0	0	0	0	0	1	0	0	0
Basidiomycota	Agaricomycetes	Cantharellales	Cantharellaceae		EcM	ITS1_00097	0	0	0	0	0	1	0	0	0	0	0	0	0	0	0	0	1	2	1	0	1	1	1	866	0	0	0	0	0	0	0	0	0	0	0	0	0	0	0	0	0	0	0
Basidiomycota	Agaricomycetes	Cantharellales	Clavulinaceae	Clavulina	EcM	ITS1_00099	0	0	0	0	0	0	0	0	0	0	0	0	0	1	0	0	1	6	2	2	1	677	364	4	41	1	2	305	2	0	0	0	0	0	0	0	0	0	0	0	0	0	0
Basidiomycota	Agaricomycetes	Russulales	Russulaceae	Russula	EcM	ITS1_00100	0	1	0	1124	2	0	0	2	0	0	0	0	2	1	0	0	0	0	0	0	0	0	0	0	0	0	0	0	0	0	0	0	256	1	0	0	1	0	0	1	0	0	0
Basidiomycota	Agaricomycetes	Cantharellales	Clavulinaceae	Clavulina	EcM	ITS1_00101	0	0	1	0	0	0	0	0	0	0	0	0	0	0	0	0	1	1	1	1	0	0	1349	1	3	0	0	2	0	0	0	0	0	0	0	0	0	0	0	0	0	0	0
Basidiomycota	Agaricomycetes	Agaricales	Inocybaceae	Inocybe	EcM	ITS1_00102	0	0	0	0	0	0	0	0	0	0	0	0	0	0	0	0	1	0	0	0	1	138	625	0	0	1	0	1	4	0	0	0	0	0	0	0	0	0	0	0	0	0	0
Basidiomycota	Agaricomycetes	Agaricales	Hygrophoraceae	Hygrocybe	NM	ITS1_00103	7	2	0	2	3	0	1113	3	1	1	3	1	1	3	0	2	0	0	0	0	0	0	0	0	0	0	0	0	0	0	0	0	0	0	0	208	0	0	0	0	0	0	0
Basidiomycota	Agaricomycetes	Russulales	Russulaceae	Russula	EcM	ITS1_00104	1	1	0	0	165	84	0	0	0	0	1	0	0	0	0	1	0	2	0	0	0	0	0	1	0	0	0	0	0	1	0	0	0	834	239	0	1	0	0	0	1	1	0
Basidiomycota	Agaricomycetes	Agaricales	Hygrophoraceae	Hygrocybe	NM	ITS1_00105	1	0	0	2	1	0	0	563	0	0	0	0	0	3	0	0	0	0	0	0	0	0	0	0	0	0	0	0	0	0	0	0	0	1	0	0	764	0	0	0	0	0	2
Basidiomycota	Agaricomycetes	Agaricales	Clavariaceae		NM	ITS1_00107	0	779	285	1	1	0	0	1	0	2	1	2	0	0	0	1	0	0	0	0	0	0	1	2	0	3	0	1	1	1	160	75	0	0	0	0	0	0	0	0	0	0	0
Basidiomycota	Agaricomycetes	Boletales	Sclerodermataceae	Scleroderma	EcM	ITS1_00108	0	0	0	1	0	0	92	1	0	1	0	2	2	960	0	3	0	0	0	0	0	0	0	0	0	0	0	0	0	0	0	0	0	0	0	27	0	4	0	0	0	0	219
Basidiomycota	Agaricomycetes	Russulales	Russulaceae	Russula	EcM	ITS1_00109	0	1	0	0	0	0	0	0	0	0	0	0	0	0	0	0	0	1142	1	0	0	0	0	1	0	20	10	1	1	0	0	0	0	0	0	0	0	0	0	0	0	0	0
Ascomycota	Sordariomycetes	Hypocreales	Clavicipitaceae		NM	ITS1_00110	0	0	0	0	0	0	0	0	0	0	0	0	7	0	0	25	316	1	0	1	1	549	19	4	23	5	339	5	0	0	0	0	0	0	0	0	0	0	0	0	0	0	0
Basidiomycota	Agaricomycetes	Thelephorales	Thelephoraceae	Tomentella	EcM	ITS1_00111	0	1	0	1	0	0	115	0	4	0	0	1	1	99	820	0	0	0	0	0	0	0	0	0	0	0	0	0	0	0	0	0	0	1	0	8	0	4	0	0	0	1	29
Basidiomycota	Wallemiomycetes	Geminibasidiales	Geminibasidiaceae	Geminibasidium	NM	ITS1_00112	6	1	0	3	36	24	0	837	2	31	16	184	20	0	1	1	0	0	0	0	0	0	0	0	0	0	0	1	0	0	0	0	2	8	2	0	75	0	2	2	9	3	0
Basidiomycota	Agaricomycetes	Russulales	Russulaceae	Russula	EcM	ITS1_00113	0	0	0	0	0	0	0	0	0	0	0	0	0	0	0	0	1	2	0	0	0	0	1	1067	0	1	1	6	3	0	0	0	0	0	0	0	0	0	0	0	0	0	0
Basidiomycota	Agaricomycetes	Thelephorales	Thelephoraceae		EcM	ITS1_00114	0	0	0	0	0	0	0	0	0	0	0	0	0	0	0	0	0	1	0	0	0	0	0	1	0	0	1	3	835	0	0	0	0	0	0	0	0	0	0	0	0	0	0
Basidiomycota	Wallemiomycetes	Geminibasidiales	Geminibasidiaceae	Geminibasidium	NM	ITS1_00115	83	1	0	19	31	35	0	48	5	53	132	190	13	0	0	1	0	1	0	0	0	0	0	0	0	0	4	10	0	23	0	0	4	32	6	0	256	5	46	159	95	5	1
Basidiomycota	Agaricomycetes	Russulales	Russulaceae		EcM	ITS1_00116	0	0	0	1258	0	0	0	0	0	1	0	0	0	3	0	1	0	0	0	0	0	0	0	0	0	0	0	0	0	0	0	0	0	0	0	0	0	0	0	0	0	0	0
Basidiomycota	Agaricomycetes	Agaricales	Cortinariaceae	Cortinarius	EcM	ITS1_00117	314	0	0	0	13	12	0	0	0	0	0	1	0	1	1	1	0	0	0	0	0	0	1	0	0	0	0	1	0	841	0	0	0	55	10	1	0	0	0	0	0	1	1
Basidiomycota	Agaricomycetes	Polyporales	Ganodermataceae	Ganoderma	NM	ITS1_00119	21	68	25	36	7	5	23	9	39	82	78	214	22	167	21	2	1	5	0	1	0	1	0	8	15	16	3	2	0	7	24	7	16	6	1	10	5	39	61	34	72	7	63
Basidiomycota	Agaricomycetes	Sebacinales	Sebacinaceae		EcM	ITS1_00120	0	0	0	3	1	0	0	1134	2	1	1	0	0	2	4	2	0	0	0	0	0	0	0	0	0	0	0	0	0	0	0	0	0	0	0	0	79	0	0	0	0	0	0
Basidiomycota	Fungi_other				NM	ITS1_00121	566	0	0	0	1	0	1	1	0	0	0	0	2	1	0	1	0	0	0	0	0	0	0	0	0	0	0	0	0	646	1	0	0	1	0	0	0	0	0	0	1	0	0
Basidiomycota	Agaricomycetes	Cantharellales	Clavulinaceae	Clavulina	EcM	ITS1_00122	0	0	1	0	0	0	0	0	1	0	0	0	0	0	0	0	1	1	1	0	0	0	898	2	66	2	83	5	1	0	0	0	0	0	0	0	0	0	0	0	0	0	0
Basidiomycota	Agaricomycetes	Trechisporales			NM	ITS1_00123	4	0	0	0	705	442	0	1	0	0	0	0	1	1	0	0	0	1	0	0	0	0	2	0	1	0	0	1	1	0	0	0	0	51	9	0	0	0	0	0	0	0	0
Basidiomycota	Agaricomycetes	Russulales	Russulaceae	Russula	EcM	ITS1_00124	0	0	0	0	0	0	0	0	0	0	0	0	0	0	0	0	0	1	3	0	0	0	0	0	0	0	1	1195	7	0	0	0	0	0	0	0	0	0	0	0	0	0	0
Basidiomycota	Agaricomycetes	Cantharellales	Cantharellaceae		EcM	ITS1_00125	0	0	0	553	0	0	0	0	0	0	17	0	0	0	0	0	0	0	0	0	0	0	0	0	0	0	0	0	0	0	0	0	605	0	0	0	0	0	0	19	0	2	1
Ascomycota	Sordariomycetes	Hypocreales	Hypocreaceae	Trichoderma	NM	ITS1_00126	48	0	1	4	4	4	0	12	0	19	5	1	39	0	0	4	601	21	8	6	12	15	12	8	50	141	129	35	1	0	0	0	0	0	0	0	0	0	0	0	0	0	0
Basidiomycota	Agaricomycetes	Agaricales	Psathyrellaceae	Psathyrella	NM	ITS1_00127	0	0	0	0	1	0	0	1	0	0	0	0	0	0	408	0	0	0	0	0	0	0	0	0	0	0	0	0	0	0	1	0	0	2	0	0	0	0	1	0	0	0	0
Basidiomycota	Fungi_other				NM	ITS1_00128	0	0	0	0	1	0	0	0	111	1	0	1	0	1	406	2	0	0	0	0	0	0	0	0	0	1	0	0	0	0	0	0	0	0	0	1	1	128	0	0	0	0	0
Basidiomycota	Agaricomycetes	Agaricales	Cortinariaceae	Cortinarius	EcM	ITS1_00129	0	0	0	0	0	0	0	0	0	0	0	0	0	0	0	0	0	3	0	475	458	0	2	1	1	0	2	0	0	0	0	0	0	0	0	0	0	0	0	0	0	0	0
Basidiomycota	Agaricomycetes	Thelephorales	Thelephoraceae		EcM	ITS1_00130	0	2	0	4	1	0	0	851	2	0	0	1	0	3	2	0	0	0	0	0	0	41	0	0	0	0	0	0	0	0	0	0	1	0	0	0	229	0	0	0	0	0	0
Ascomycota	Eurotiomycetes	Eurotiales	Trichocomaceae	Penicillium	NM	ITS1_00131	0	0	0	0	0	0	2	3	0	50	22	0	0	0	0	0	25	0	0	0	0	2	0	0	0	0	0	0	0	1	0	0	0	0	0	6	29	3	616	202	0	0	0
Ascomycota	Sordariomycetes	Hypocreales	Hypocreaceae		NM	ITS1_00132	4	6	1	8	6	4	53	31	353	105	26	26	7	15	33	1	127	1	0	1	4	103	0	1	107	47	62	9	0	0	0	0	0	0	0	0	0	0	0	0	0	0	0
Basidiomycota	Agaricomycetes	Russulales	Russulaceae	Russula	EcM	ITS1_00134	0	0	0	0	0	0	0	0	0	1	0	0	0	0	0	0	0	0	0	1	0	0	2	698	4	0	0	3	0	0	0	1	0	0	0	0	0	0	0	0	0	0	0
Basidiomycota	Agaricomycetes	Cantharellales	Cantharellaceae		EcM	ITS1_00136	0	0	0	0	0	0	0	0	0	0	0	0	0	0	0	0	0	0	0	0	0	0	0	0	331	0	0	0	0	0	0	0	0	0	0	0	0	0	0	0	0	0	0
Basidiomycota	Agaricomycetes	Agaricales			NM	ITS1_00137	0	0	0	0	0	0	0	1	0	0	0	1	2	642	2	2	0	1	0	0	0	1	0	254	1	0	0	0	0	0	0	0	0	0	0	0	1	0	0	0	0	0	146
Basidiomycota	Agaricomycetes	Cantharellales	Clavulinaceae	Clavulina	EcM	ITS1_00138	0	0	0	743	0	0	0	3	1	1	5	0	1	1	1	3	0	0	0	0	0	0	0	0	0	0	0	0	0	0	0	0	321	0	0	1	0	0	0	0	0	0	0
Basidiomycota	Agaricomycetes	Russulales	Russulaceae	Lactifluus	EcM	ITS1_00140	0	0	0	0	289	163	0	0	0	1	0	0	0	0	0	0	0	1	2	0	1	0	0	1	1	0	0	0	1	0	0	0	1	489	111	0	1	0	0	0	1	0	0
Basidiomycota	Agaricomycetes	Agaricales	Cortinariaceae	Cortinarius	EcM	ITS1_00141	0	0	0	0	0	0	0	0	0	0	0	0	0	0	0	0	0	0	0	0	0	0	0	0	0	0	0	0	0	0	0	1	0	0	0	0	0	0	0	0	0	0	0
Basidiomycota	Agaricomycetes	Agaricales	Cortinariaceae	Cortinarius	EcM	ITS1_00142	0	0	1	0	0	1	0	0	0	0	0	0	0	0	0	0	0	3	1	259	553	0	8	2	0	1	1	4	0	0	0	0	0	0	0	0	0	0	0	0	0	0	0
Basal lineages7	Fungi_other				NM	ITS1_00143	20	0	0	1	207	109	0	2	0	1	0	2	0	0	0	0	0	1	0	0	0	0	0	0	0	0	0	0	0	36	0	0	2	527	121	0	6	0	0	13	7	2	0
Basidiomycota	Agaricomycetes	Russulales	Russulaceae	Russula	EcM	ITS1_00144	0	0	0	0	0	0	0	0	0	0	0	0	0	0	0	0	0	1	1	148	147	0	504	0	1	0	0	26	1	0	0	0	0	0	0	0	0	0	0	0	0	0	0
Basidiomycota	Agaricomycetes	Russulales	Russulaceae	Russula	EcM	ITS1_00145	0	0	0	0	0	0	0	0	0	0	0	0	0	0	0	0	0	0	0	0	0	0	0	0	0	0	2	642	2	0	0	0	0	0	0	0	0	0	0	0	0	0	0
Basidiomycota	Agaricomycetes	Cantharellales	Clavulinaceae	Clavulina	EcM	ITS1_00146	0	0	0	0	0	0	0	0	0	0	0	0	0	0	0	0	0	0	0	0	0	18	2	0	1	0	0	34	0	0	0	0	0	0	0	0	0	0	0	0	0	0	0
Basidiomycota	Agaricomycetes	Agaricales			NM	ITS1_00147	1	0	0	2	1	0	403	2	0	2	1	0	1	1	1	0	0	0	0	0	0	0	0	0	0	0	0	0	0	0	0	0	0	0	0	628	2	0	0	0	0	1	0
Basidiomycota	Agaricomycetes	Agaricales	Cortinariaceae	Cortinarius	EcM	ITS1_00148	0	0	0	0	0	0	0	0	0	0	0	0	0	0	0	0	0	1	0	19	2	0	1	1	0	0	1	452	0	0	0	0	0	0	0	0	0	0	0	0	0	0	0
Basidiomycota	Agaricomycetes	Russulales	Russulaceae	Russula	EcM	ITS1_00149	0	0	0	0	0	0	0	0	0	6	24	8	2	0	0	0	0	0	0	0	0	0	0	0	0	0	0	0	0	0	0	0	3	0	0	0	0	0	480	16	505	7	0
Basidiomycota	Agaricomycetes	Agaricales			EcM	ITS1_00150	0	0	0	0	0	1	0	0	0	0	0	0	0	0	0	0	9	45	1	16	3	0	6	599	3	2	2	356	4	0	0	0	0	0	0	0	0	0	0	0	0	0	0
Basidiomycota	Agaricomycetes	Russulales	Russulaceae		EcM	ITS1_00151	0	0	0	0	0	0	0	0	0	0	0	0	0	0	0	0	1	3	0	0	0	0	1	1036	2	0	0	2	1	0	0	0	0	0	0	0	0	0	0	0	0	0	0
Basidiomycota	Agaricomycetes	Russulales	Russulaceae	Russula	EcM	ITS1_00152	0	0	0	0	0	0	0	0	0	0	0	0	0	0	0	0	2	1007	1	0	0	0	0	1	0	23	0	3	0	0	0	0	0	0	0	0	0	0	0	0	0	0	0
Basidiomycota	Agaricomycetes	Russulales	Russulaceae		EcM	ITS1_00153	0	0	0	0	0	0	0	0	0	0	0	0	0	0	0	0	2	4	0	182	620	0	111	1	1	0	3	109	1	0	0	0	0	0	0	0	0	0	0	0	0	0	0
Basidiomycota	Agaricomycetes	Agaricales	Cortinariaceae	Cortinarius	EcM	ITS1_00154	0	0	0	0	0	0	0	0	0	0	0	0	0	0	0	0	0	0	0	834	0	0	0	0	0	0	0	0	0	0	0	0	0	0	0	0	0	0	0	0	0	0	0
Basidiomycota	Agaricomycetes	Russulales	Russulaceae	Lactifluus	EcM	ITS1_00155	3	0	0	1	0	0	0	6	789	2	2	1	1	2	0	1	0	0	0	0	0	0	0	0	0	0	0	0	0	0	0	0	0	0	0	0	0	202	0	0	0	0	0
Basidiomycota	Agaricomycetes	Cantharellales	Clavulinaceae	Clavulina	EcM	ITS1_00156	3	2	0	1	1	0	614	0	12	3	1	0	1	0	0	0	0	0	0	0	0	0	0	0	0	0	0	0	0	0	0	0	1	0	0	369	1	0	0	0	0	0	0
Basidiomycota	Agaricomycetes	Agaricales	Bolbitiaceae	Conocybe	NM	ITS1_00157	0	0	0	0	0	0	0	0	0	0	0	1	1	483	3	1	0	0	0	0	0	0	0	0	0	0	0	0	0	0	0	0	2	0	0	0	1	0	0	0	0	0	515
Basidiomycota	Agaricomycetes	Russulales	Russulaceae	Gymnomyces	EcM	ITS1_00158	0	0	0	0	0	0	0	0	0	0	0	0	0	0	0	0	0	0	0	0	0	0	0	1	0	0	0	71	0	0	0	0	0	0	0	0	0	0	0	0	0	0	0
Basidiomycota	Agaricomycetes	Agaricales	Cortinariaceae	Cortinarius	EcM	ITS1_00159	0	0	0	0	0	0	0	0	0	0	0	0	0	0	0	0	0	0	0	0	0	0	13	1	0	0	0	0	0	0	0	0	0	0	0	0	0	0	0	0	0	0	0
Basidiomycota	Agaricomycetes	Cantharellales	Clavulinaceae	Clavulina	EcM	ITS1_00160	0	0	0	0	0	0	0	0	0	0	0	0	0	0	0	0	0	1	2	1	1	0	0	616	0	0	0	2	0	0	0	0	0	0	0	0	0	0	0	0	0	0	0
Basidiomycota	Agaricomycetes	Thelephorales	Thelephoraceae	Tomentella	EcM	ITS1_00161	0	0	1	0	0	1	0	0	0	0	0	0	0	0	0	0	1	0	1	0	0	925	2	2	6	1	0	30	0	0	0	0	0	0	0	0	0	0	0	0	0	0	0
Basidiomycota	Agaricomycetes	Hysterangiales			EcM	ITS1_00162	0	0	0	0	2	2	0	0	0	0	0	0	0	0	0	0	0	0	0	0	0	0	0	0	0	0	0	0	0	2	0	0	0	784	184	0	0	0	0	0	0	0	0
Ascomycota	Sordariomycetes	Sordariales	Sordariaceae	Gelasinospora	NM	ITS1_00163	7	2	4	2	371	268	3	211	6	1	1	4	5	29	3	3	7	0	0	3	0	0	6	16	1	4	8	0	0	0	0	0	0	1	1	0	0	0	0	0	0	0	0
Basidiomycota	Agaricomycetes	Trechisporales	Hydnodontaceae	Trechispora	NM	ITS1_00164	0	0	0	1	308	176	0	0	0	0	0	0	0	0	0	0	0	0	0	0	0	0	0	0	0	0	0	1	0	0	0	0	1	376	100	0	0	0	0	0	0	0	1
Basidiomycota	Agaricomycetes	Sebacinales	Serendipitaceae		NM	ITS1_00165	0	0	0	0	0	0	0	0	0	0	0	0	0	0	0	0	1	0	835	0	1	0	2	0	0	0	0	0	0	0	0	0	0	0	0	0	0	0	0	0	0	0	0
Basidiomycota	Agaricomycetes	Russulales	Russulaceae	Russula	EcM	ITS1_00166	0	0	0	3	0	0	0	0	0	0	0	0	0	0	0	0	0	0	0	0	0	0	0	0	0	0	0	0	0	0	0	0	956	1	0	0	1	0	0	0	0	0	0
Basidiomycota	Agaricomycetes	Russulales	Russulaceae	Russula	EcM	ITS1_00167	0	0	0	0	0	1	0	0	0	0	0	0	0	0	0	0	624	9	0	0	1	0	0	0	0	2	0	5	0	0	0	0	0	0	0	0	0	0	0	0	0	0	0
Basidiomycota	Agaricomycetes	Agaricales	Cortinariaceae	Cortinarius	EcM	ITS1_00168	0	0	0	0	0	0	0	0	0	0	0	0	0	0	0	0	0	2	0	773	180	0	0	0	0	1	0	3	0	0	0	0	0	0	0	0	0	0	0	0	0	0	0
Basidiomycota	Agaricomycetes	Agaricales			EcM	ITS1_00169	0	0	0	0	0	0	0	0	0	0	0	0	0	0	0	0	2	16	0	7	4	0	0	5	0	0	0	87	0	0	0	0	0	0	0	0	0	0	0	0	0	0	0
Basidiomycota	Agaricomycetes	Cantharellales			NM	ITS1_00170	1	0	0	0	0	0	0	0	0	0	0	0	0	0	0	915	0	0	0	0	0	0	0	0	0	0	0	0	0	0	0	0	0	0	0	0	0	0	0	0	0	0	0
Basidiomycota	Agaricomycetes	Agaricales	Hygrophoraceae	Camarophyllus	NM	ITS1_00171	0	0	1	0	0	1	0	0	0	0	0	0	0	0	0	0	0	2	1	0	1	0	0	937	1	0	2	1	0	0	0	0	0	0	0	0	0	0	0	0	0	0	0
Basidiomycota	Agaricomycetes	Thelephorales	Thelephoraceae	Tomentella	EcM	ITS1_00172	0	1	0	0	0	0	0	0	1	0	0	0	0	1	942	0	0	0	0	0	0	0	0	0	0	0	0	0	0	0	0	0	0	0	0	0	0	0	0	0	0	0	0
Basidiomycota	Agaricomycetes	Russulales	Russulaceae	Russula	EcM	ITS1_00174	0	0	0	0	0	0	0	0	0	0	0	0	0	0	0	0	0	2	0	0	0	1	0	0	0	0	2	777	3	0	0	0	0	0	0	0	0	0	0	0	0	0	0
Ascomycota	Eurotiomycetes	Eurotiales			NM	ITS1_00175	0	0	0	0	0	0	0	0	0	31	290	0	1	0	0	0	0	0	0	0	0	0	0	0	0	0	0	0	0	0	0	0	0	3	0	2	1	5	67	415	0	0	0
Basidiomycota	Fungi_other				NM	ITS1_00176	0	0	0	1	0	0	8	0	0	0	0	0	0	0	452	0	0	0	0	0	0	0	0	0	0	0	0	0	0	0	0	0	1	0	0	0	0	0	0	0	0	0	0
Basidiomycota	Agaricomycetes	Russulales	Russulaceae	Russula	EcM	ITS1_00177	1	0	0	0	1	0	0	0	0	0	0	0	513	0	0	3	0	0	0	0	0	0	0	0	0	0	0	0	0	1	0	0	6	3	0	2	1	0	0	0	1	408	0
Ascomycota	Sordariomycetes	Hypocreales	Hypocreaceae	Trichoderma	NM	ITS1_00178	53	2	2	15	5	2	20	3	77	0	1	2	0	0	39	1	22	0	0	0	0	32	5	50	441	71	77	15	1	0	0	1	0	0	0	0	0	0	0	0	0	0	0
Ascomycota	Leotiomycetes	Helotiales	Myxotrichaceae	Oidiodendron	NM	ITS1_00179	0	0	0	1	0	0	0	0	0	0	0	0	0	0	0	0	2	0	0	0	0	0	0	0	0	0	1	0	0	0	0	0	11	0	0	0	0	0	0	0	0	2	0
Ascomycota	Eurotiomycetes	Eurotiales	Trichocomaceae	Penicillium	NM	ITS1_00181	0	0	0	0	2	1	1	138	0	203	323	1	0	0	1	0	82	0	0	0	0	5	1	0	14	0	60	0	0	0	0	0	0	0	0	0	82	0	0	4	0	1	0
Basidiomycota	Agaricomycetes	Agaricales	Inocybaceae	Inocybe	EcM	ITS1_00182	0	0	0	1	0	0	0	2	0	1	0	0	0	682	245	1	0	0	0	0	0	0	0	0	0	0	0	0	0	0	0	0	0	0	0	0	0	0	0	0	0	0	0
Basidiomycota	Agaricomycetes	Russulales	Russulaceae	Russula	EcM	ITS1_00183	0	0	0	0	1	0	0	0	0	114	484	112	32	0	1	0	0	0	0	0	0	0	0	0	0	0	0	0	0	0	0	0	0	0	0	0	0	0	10	107	55	12	0
Basidiomycota	Agaricomycetes	Cantharellales	Cantharellaceae		EcM	ITS1_00184	0	0	0	0	0	0	0	0	0	0	0	0	0	0	0	0	0	417	0	0	0	0	2	0	0	28	95	1	0	0	0	1	0	0	0	0	0	0	0	0	0	0	0
Basidiomycota	Agaricomycetes	Cantharellales	Clavulinaceae		EcM	ITS1_00186	0	0	0	0	0	0	0	0	0	0	0	0	0	0	0	0	0	0	0	0	0	0	1	0	0	0	0	2	870	0	0	0	0	0	0	0	0	0	0	0	0	0	0
Basidiomycota	Agaricomycetes	Agaricales	Inocybaceae	Inocybe	EcM	ITS1_00187	0	0	0	0	0	0	0	46	0	0	0	0	0	0	0	0	0	0	0	0	0	0	0	0	0	0	0	0	0	0	0	0	0	2	0	0	870	0	1	0	0	0	0
Basidiomycota	Agaricomycetes	Agaricales	Tricholomataceae	Tricholoma	NM	ITS1_00188	0	0	0	0	0	0	0	0	0	0	0	0	0	0	0	0	2	2	1	0	0	0	1	0	1	616	0	0	5	0	0	0	0	0	0	0	0	0	0	0	0	0	0
Basidiomycota	Agaricomycetes	Thelephorales	Thelephoraceae		EcM	ITS1_00189	0	0	0	0	0	1	0	0	0	0	0	0	0	0	0	0	0	0	1	1	0	0	3	785	1	1	0	3	2	0	0	0	0	0	0	0	0	0	0	0	0	0	0
Basidiomycota	Agaricomycetes	Russulales	Russulaceae	Russula	EcM	ITS1_00190	0	0	0	308	0	0	1	0	0	0	2	1	1	0	0	1	1	567	0	0	0	0	0	0	0	24	0	1	1	0	0	0	1	0	0	0	0	0	0	0	0	0	0
Basidiomycota	Agaricomycetes	Agaricales	Hygrophoraceae	Hygrocybe	NM	ITS1_00191	0	0	0	0	0	0	0	0	0	0	0	0	0	0	0	0	0	0	0	0	0	0	0	0	0	0	0	0	0	0	0	0	0	0	0	0	911	0	0	0	0	0	0
Basidiomycota	Agaricomycetes	Agaricales	Mycenaceae	Mycena	NM	ITS1_00192	1	166	48	0	0	0	0	0	0	0	0	0	1	1	0	5	0	0	0	0	0	0	0	0	0	0	0	0	0	0	413	190	1	0	0	0	0	0	0	0	1	0	0
Basidiomycota	Agaricomycetes	Russulales	Russulaceae	Russula	EcM	ITS1_00193	2	1	0	634	1	1	0	0	0	1	3	1	1	0	0	1	83	1	0	0	0	0	0	0	1	0	18	103	3	0	0	0	6	0	0	0	0	0	0	13	0	0	0
Basidiomycota	Agaricomycetes	Russulales	Russulaceae	Russula	EcM	ITS1_00194	1	0	0	645	0	0	0	0	0	0	1	0	0	0	0	0	0	0	0	0	0	0	0	1	0	0	0	0	0	0	0	0	253	0	0	0	0	0	0	0	0	0	0
Basidiomycota	Agaricomycetes	Trechisporales	Hydnodontaceae	Trechispora	NM	ITS1_00195	1	0	0	0	312	177	0	1	0	0	0	0	0	1	0	0	0	1	0	0	0	0	0	0	0	0	1	0	0	0	1	0	0	317	85	0	0	0	0	0	0	0	0
Chytridiomycota	Chytridiomycetes	Rhizophlyctidales	Rhizophlyctidaceae		NM	ITS1_00196	99	42	5	356	0	0	0	0	0	0	0	0	3	0	0	0	0	0	1	0	0	0	0	0	0	0	0	0	0	56	8	8	319	0	0	0	0	0	1	0	0	0	0
Ascomycota	Eurotiomycetes	Eurotiales	Trichocomaceae	Talaromyces	NM	ITS1_00197	59	0	0	1	4	1	5	10	773	21	20	0	1	2	0	1	0	0	0	0	0	0	0	0	0	0	0	0	0	0	0	0	0	0	0	0	0	0	0	0	0	0	0
Basidiomycota	Agaricomycetes	Russulales	Russulaceae		EcM	ITS1_00198	0	0	0	0	0	0	0	0	0	0	0	0	0	0	0	0	46	166	0	0	0	0	0	1	0	1	0	633	3	0	0	0	0	0	0	0	0	0	0	0	0	0	0
Basidiomycota	Agaricomycetes	Russulales	Russulaceae	Russula	EcM	ITS1_00199	338	1	0	0	3	0	0	0	1	1	2	21	2	0	1	0	0	0	0	0	0	0	0	0	0	0	0	0	0	494	0	0	1	4	0	0	0	0	3	1	16	6	0
Ascomycota	Eurotiomycetes	Eurotiales	Trichocomaceae	Penicillium	NM	ITS1_00200	0	0	0	0	0	0	0	0	0	0	0	0	0	0	0	7	300	0	0	1	0	252	1	0	37	2	1	0	1	1	0	0	0	0	0	0	0	0	0	0	0	0	0
Basidiomycota	Agaricomycetes	Russulales	Russulaceae	Russula	EcM	ITS1_00201	0	0	0	0	2	0	0	2	0	0	0	3	0	0	0	0	0	0	0	0	0	0	0	7	0	0	0	0	0	0	1	0	5	31	5	0	411	0	0	0	249	1	0
Basidiomycota	Agaricomycetes	Russulales	Russulaceae	Russula	EcM	ITS1_00202	0	0	0	0	0	0	0	0	0	0	0	0	0	0	0	0	0	0	0	0	0	0	0	0	0	0	0	0	0	0	0	0	0	0	0	0	0	0	221	354	158	157	0
Basidiomycota	Agaricomycetes	Sebacinales	Sebacinaceae	Sebacina	EcM	ITS1_00203	1	0	0	753	0	0	0	1	0	0	0	0	0	0	0	1	0	0	0	0	0	0	0	0	0	0	0	0	0	0	0	0	129	0	0	0	0	0	0	0	0	0	0
Ascomycota	Sordariomycetes	Xylariales	Amphisphaeriaceae	Pestalotiopsis	NM	ITS1_00204	6	6	1	4	5	0	4	2	2	42	16	1	3	3	2	6	74	2	2	1	0	345	4	13	112	31	196	4	2	0	0	0	0	0	0	0	0	0	0	0	0	0	0
Mortierellomycota	Mortierellomycetes	Mortierellales	Mortierellaceae	Mortierella	NM	ITS1_00205	1	0	0	1	1	0	20	1	0	0	0	0	0	5	661	0	0	0	0	0	0	0	0	0	0	0	0	0	1	0	0	0	1	0	0	5	3	2	2	0	1	0	0
Basidiomycota	Agaricomycetes	Russulales	Russulaceae	Russula	EcM	ITS1_00206	0	0	0	57	0	0	0	0	0	0	0	0	0	0	0	0	0	0	0	0	0	0	0	0	0	0	0	0	0	0	0	0	819	0	0	0	0	0	0	0	0	0	0
Basidiomycota	Agaricomycetes	Russulales	Russulaceae	Russula	EcM	ITS1_00207	0	0	0	0	0	0	1	0	0	0	0	864	9	0	2	0	0	0	0	0	0	0	0	0	0	0	0	0	0	0	0	0	0	0	0	0	0	0	0	0	0	0	0
Basidiomycota	Agaricomycetes	Agaricales	Marasmiaceae	Marasmiellus	NM	ITS1_00208	0	0	0	0	0	0	0	0	0	0	0	0	0	0	0	0	0	0	0	0	0	0	0	0	0	0	0	0	0	0	2	0	0	0	0	0	0	0	0	0	0	0	0
Basidiomycota	Agaricomycetes	Agaricales	Hydnangiaceae	Laccaria	EcM	ITS1_00209	0	0	0	0	0	0	22	0	0	0	0	0	0	98	0	0	0	0	0	0	0	0	0	4	0	0	0	0	0	1	0	0	5	0	0	99	0	1	1	0	0	1	599
Basidiomycota	Agaricomycetes	Thelephorales	Thelephoraceae	Tomentella	EcM	ITS1_00210	0	0	0	0	1	0	0	1	0	0	0	0	0	1	561	1	0	0	0	0	0	0	0	0	0	0	0	0	0	0	0	0	1	0	0	0	0	0	1	0	0	0	0
Ascomycota	Eurotiomycetes	Chaetothyriales	Herpotrichiellaceae	Cladophialophora	NM	ITS1_00211	20	0	0	0	264	151	8	0	3	0	1	1	0	153	1	0	1	0	0	0	0	0	1	1	0	1	0	0	0	14	0	0	0	143	31	7	2	2	0	0	2	0	53
Basidiomycota	Agaricomycetes	Agaricales	Cortinariaceae	Cortinarius	EcM	ITS1_00212	0	0	0	0	0	0	0	0	0	0	0	0	0	0	0	0	0	2	0	220	307	0	2	2	0	0	0	0	0	0	0	0	0	0	0	0	0	0	0	0	0	0	0
Basidiomycota	Agaricomycetes	Thelephorales	Thelephoraceae	Tomentella	EcM	ITS1_00213	0	1	0	270	0	0	0	1	0	0	0	0	0	0	1	0	21	252	0	0	0	0	1	1	0	97	18	72	1	0	0	0	70	0	0	0	0	0	1	0	0	0	0
Basidiomycota	Agaricomycetes	Hymenochaetales	Repetobasidiaceae	Rickenella	NM	ITS1_00214	14	0	0	1	182	114	0	0	0	0	1	1	1	0	0	0	0	0	0	0	1	0	1	1	0	0	0	3	2	15	1	1	2	383	117	1	0	1	1	0	0	0	0
Basidiomycota	Agaricomycetes	Russulales	Russulaceae	Russula	EcM	ITS1_00216	0	0	0	0	0	0	0	0	0	0	0	0	0	0	0	0	0	222	2	48	568	10	1	2	0	0	1	1	0	0	0	0	0	0	0	0	0	0	0	0	0	0	0
Basidiomycota	Agaricomycetes	Cantharellales	Ceratobasidiaceae		EcM	ITS1_00217	1	0	0	113	103	51	1	50	1	43	57	248	3	3	2	0	0	1	0	0	0	0	2	2	0	0	1	56	0	1	0	0	19	3	5	0	19	0	5	9	41	1	0
Basidiomycota	Agaricomycetes	Boletales	Sclerodermataceae	Scleroderma	EcM	ITS1_00218	0	0	0	0	0	0	0	1	3	0	0	0	0	826	2	0	0	0	0	0	0	0	0	0	0	0	0	0	0	0	0	0	0	0	0	4	0	0	0	0	0	0	18
Basidiomycota	Agaricomycetes	Polyporales	Ganodermataceae	Ganoderma	NM	ITS1_00219	9	5	0	10	3	1	102	5	61	4	15	13	2	158	99	8	5	3	0	0	0	1	0	11	9	13	5	0	1	4	3	0	7	9	1	108	3	56	5	6	7	1	49
Ascomycota	Sordariomycetes	Hypocreales	Hypocreaceae	Trichoderma	NM	ITS1_00220	7	24	10	15	5	5	15	8	319	185	36	59	5	5	4	6	38	0	0	0	0	10	4	2	20	26	35	9	0	0	0	0	0	0	0	0	0	0	0	0	0	0	0
Basidiomycota	Agaricomycetes	Sebacinales	Serendipitaceae		NM	ITS1_00221	0	0	0	0	0	0	0	0	0	0	0	0	0	0	0	0	0	0	0	0	0	0	2	0	0	0	0	0	595	0	0	0	0	0	0	0	0	0	0	0	0	0	0
Basidiomycota	Agaricomycetes	Agaricales	Agaricaceae	Lycoperdon	NM	ITS1_00222	0	0	0	0	0	0	0	0	0	0	0	0	0	0	0	0	0	2	0	0	2	4	3	134	0	0	0	2	560	0	0	0	0	0	0	0	0	0	0	0	0	0	0
Basidiomycota	Agaricomycetes	Russulales	Russulaceae		EcM	ITS1_00225	2	0	0	0	2	0	211	1	0	1	2	0	1	0	1	1	0	0	1	0	0	0	0	11	0	0	0	200	0	0	1	0	9	2	0	329	1	1	1	2	1	1	0
Basidiomycota	Agaricomycetes	Agaricales	Inocybaceae	Inocybe	EcM	ITS1_00226	0	0	0	0	0	0	0	0	0	0	0	0	0	0	0	0	0	1	0	0	0	0	0	0	0	0	0	0	829	0	0	0	0	0	0	0	0	0	0	0	0	0	0
Basidiomycota	Agaricomycetes	Russulales	Russulaceae		EcM	ITS1_00227	0	0	0	0	0	0	0	0	0	0	0	0	0	0	0	0	0	63	0	1	0	0	0	0	1	0	9	441	1	0	0	0	0	0	0	0	0	0	0	0	0	0	0
Ascomycota	Sordariomycetes	Hypocreales	Clavicipitaceae	Pochonia	NM	ITS1_00228	0	0	1	0	0	0	0	0	0	0	0	0	0	0	0	0	167	0	1	0	0	129	0	0	102	126	291	1	0	0	0	0	0	0	0	0	0	0	0	0	0	0	0
Basidiomycota	Agaricomycetes	Thelephorales	Thelephoraceae		EcM	ITS1_00229	0	0	0	1	271	177	0	179	0	0	1	2	0	0	5	1	1	0	1	0	0	1	3	2	0	0	0	2	0	0	0	0	1	88	22	0	56	1	0	0	0	0	0
Basidiomycota	Agaricomycetes	Russulales	Russulaceae	Russula	EcM	ITS1_00230	0	0	0	0	0	0	0	0	0	0	0	0	0	0	0	0	1	2	0	682	0	1	0	0	0	1	0	1	0	0	0	0	0	0	0	0	0	0	0	0	0	0	0
Basidiomycota	Agaricomycetes	Polyporales	Ganodermataceae	Ganoderma	NM	ITS1_00231	9	4	3	6	6	1	143	6	51	13	11	4	2	213	68	5	0	6	1	0	0	0	0	6	9	19	2	4	1	10	4	3	0	2	2	51	4	39	4	3	2	0	50
Ascomycota	Sordariomycetes	Hypocreales	Hypocreaceae	Trichoderma	NM	ITS1_00232	8	1	0	0	1	2	9	5	4	30	3	1	8	0	2	1	149	6	1	1	1	36	5	20	81	258	169	10	0	0	0	0	0	0	0	0	0	0	0	0	0	0	0
Ascomycota	Eurotiomycetes	Eurotiales	Trichocomaceae	Penicillium	NM	ITS1_00233	1	0	0	0	0	0	0	0	0	0	8	0	1	0	0	0	221	2	0	0	0	21	1	0	15	2	303	2	0	0	0	0	0	0	0	0	0	0	0	4	1	0	0
Basidiomycota	Agaricomycetes	Agaricales	Inocybaceae	Inocybe	EcM	ITS1_00234	0	0	0	1	0	0	0	258	0	1	0	1	1	1	0	0	0	0	0	0	0	0	0	0	0	0	0	0	0	0	0	0	0	0	0	0	537	0	1	0	0	0	1
Basidiomycota	Agaricomycetes	Agaricales	Hygrophoraceae	Hygrocybe	NM	ITS1_00235	1	0	0	0	0	0	0	0	1	0	0	0	0	0	0	755	0	0	0	0	0	0	0	0	0	0	0	0	0	0	0	0	0	0	0	0	0	0	0	0	0	0	0
Ascomycota	Eurotiomycetes	Eurotiales	Trichocomaceae	Penicillium	NM	ITS1_00236	0	1	0	1	0	0	19	0	0	43	21	1	0	0	0	0	7	0	0	0	0	80	0	2	16	0	2	0	0	1	0	0	0	0	1	52	3	1	233	185	0	0	0
Basidiomycota	Agaricomycetes	Russulales	Russulaceae	Russula	EcM	ITS1_00238	0	0	0	0	517	272	0	0	0	0	0	1	0	0	0	0	1	2	1	0	2	0	1	2	0	0	0	0	0	0	0	0	0	0	0	0	0	0	0	0	0	0	0
Basidiomycota	Agaricomycetes	Agaricales	Hygrophoraceae	Hygrocybe	NM	ITS1_00239	0	0	0	1	0	0	0	0	0	0	0	0	0	0	0	789	0	0	0	0	0	0	0	0	0	0	0	0	0	0	0	0	0	0	0	0	0	0	0	0	0	0	0
Basidiomycota	Agaricomycetes	Russulales	Russulaceae	Russula	EcM	ITS1_00240	0	0	0	0	0	0	0	0	1	102	306	183	69	0	0	0	0	0	0	0	0	0	0	0	0	0	0	0	0	1	1	0	0	1	0	0	0	0	12	80	16	15	0
Basidiomycota	Agaricomycetes	Russulales	Russulaceae		EcM	ITS1_00241	0	0	0	0	0	0	0	0	0	0	0	0	0	0	0	0	0	240	0	0	0	0	0	0	0	0	0	0	0	0	0	2	0	0	0	0	0	0	0	0	0	0	0
Basidiomycota	Agaricomycetes	Thelephorales	Thelephoraceae		EcM	ITS1_00242	1	1	0	726	0	0	0	1	0	1	0	0	1	2	0	0	0	0	0	0	0	0	0	0	0	0	0	0	0	0	0	0	50	0	0	0	0	0	0	0	0	0	0
Basidiomycota	Agaricomycetes	Thelephorales	Thelephoraceae		EcM	ITS1_00243	0	0	0	0	0	1	0	0	0	0	0	0	0	0	0	0	0	16	1	0	0	3	80	1	1	0	0	460	1	0	0	0	0	0	0	0	0	0	0	0	0	0	0
Basidiomycota	Agaricomycetes	Cantharellales	Cantharellaceae		EcM	ITS1_00244	0	0	0	0	0	0	0	1	165	0	0	0	0	0	0	0	0	0	0	0	0	0	0	0	0	0	0	0	0	0	0	0	0	0	0	0	0	618	0	0	0	0	0
Basidiomycota	Agaricomycetes	Agaricales	Porotheleaceae		NM	ITS1_00245	1	0	0	1	0	0	0	0	0	0	0	0	0	0	306	2	0	0	0	0	0	0	0	0	0	0	0	0	0	0	1	0	0	0	0	0	0	0	0	0	0	0	0
Basidiomycota	Agaricomycetes	Russulales	Russulaceae	Russula	EcM	ITS1_00247	0	0	0	0	0	1	0	0	0	0	0	0	0	0	0	0	1	8	1	1	0	0	0	721	39	1	0	1	0	0	0	0	0	0	0	0	0	0	0	0	0	0	0
Ascomycota	Eurotiomycetes	Eurotiales	Trichocomaceae	Penicillium	NM	ITS1_00249	0	0	0	0	0	0	0	0	0	0	0	0	2	0	0	0	114	4	0	9	1	0	5	0	0	36	224	4	0	0	0	0	0	0	1	0	0	0	0	0	0	0	0
Basidiomycota	Agaricomycetes	Thelephorales	Thelephoraceae		EcM	ITS1_00250	1	0	0	0	0	0	0	0	0	0	0	0	0	624	3	1	0	0	0	0	0	0	0	0	0	0	0	0	0	0	0	0	1	0	0	0	0	0	0	0	0	0	133
Basidiomycota	Agaricomycetes	Agaricales	Strophariaceae	Hebeloma	EcM	ITS1_00252	0	0	2	0	0	2	0	0	0	0	0	0	0	0	0	0	0	2	1	1	2	389	346	4	11	0	0	0	0	0	0	0	0	0	0	0	0	0	0	0	0	0	0
Basidiomycota	Agaricomycetes	Russulales	Russulaceae	Gymnomyces	EcM	ITS1_00253	0	0	0	0	0	0	0	0	0	0	0	0	0	0	0	0	0	0	0	0	0	0	0	0	0	0	0	0	0	0	0	1	0	0	0	0	0	0	0	0	0	0	0
Basidiomycota	Agaricomycetes	Russulales	Russulaceae	Russula	EcM	ITS1_00254	0	0	0	0	0	0	0	0	0	0	0	0	0	0	0	0	0	0	0	0	0	0	0	0	0	0	0	396	0	0	0	0	0	0	1	0	0	0	0	0	0	0	0
Basidiomycota	Agaricomycetes	Agaricales	Cortinariaceae	Cortinarius	EcM	ITS1_00255	0	0	0	0	0	0	0	0	0	0	0	0	0	0	0	0	0	0	0	0	1	0	0	0	0	0	0	0	0	0	0	0	0	0	0	0	0	0	0	0	0	0	0
Basidiomycota	Agaricomycetes	Sebacinales			NM	ITS1_00256	0	0	0	0	0	0	0	0	0	0	0	0	0	0	0	0	0	0	740	0	0	0	4	0	0	0	0	0	1	0	0	0	0	0	0	0	0	0	0	0	0	0	0
Basidiomycota	Agaricomycetes	Agaricales	Inocybaceae	Inocybe	EcM	ITS1_00257	0	0	0	0	0	0	0	0	0	0	0	0	0	6	1	0	0	0	0	0	0	0	0	0	0	0	0	0	0	0	1	0	2	0	0	0	2	0	0	0	0	1	479
Basidiomycota	Agaricomycetes	Agaricales	Inocybaceae	Inocybe	EcM	ITS1_00258	2	1	0	1	0	0	0	680	0	3	0	3	0	2	1	1	0	0	0	0	0	0	0	0	0	0	0	0	0	0	0	0	0	0	0	0	47	0	0	0	0	0	0
Basidiomycota	Agaricomycetes	Thelephorales	Thelephoraceae		EcM	ITS1_00259	3	2	0	1	414	283	0	0	1	1	1	0	0	0	0	1	0	2	1	0	0	0	2	1	0	1	0	3	1	0	0	0	0	17	1	0	0	0	0	0	0	0	0
Basidiomycota	Agaricomycetes	Russulales	Russulaceae	Lactarius	EcM	ITS1_00260	1	0	0	3	0	0	0	0	0	112	1	254	110	2	4	3	0	0	0	0	0	0	0	0	0	0	0	0	0	0	0	0	2	1	0	0	2	0	77	0	115	49	0
Basidiomycota	Agaricomycetes	Thelephorales	Thelephoraceae	Tomentella	EcM	ITS1_00261	0	0	0	0	0	1	0	0	0	0	0	0	0	0	0	0	1	1	1	0	1	514	1	1	5	1	0	24	1	0	0	0	0	0	0	0	0	0	0	0	0	0	0
Basidiomycota	Agaricomycetes	Agaricales	Agaricaceae	Agaricus	NM	ITS1_00262	0	0	0	726	0	0	1	0	1	0	0	0	1	0	0	0	0	0	0	0	0	0	0	0	0	0	0	0	0	0	0	0	0	0	0	0	0	0	0	0	0	0	0
Basidiomycota	Agaricomycetes	Thelephorales	Thelephoraceae	Tomentella	EcM	ITS1_00263	0	0	0	0	0	0	0	0	0	0	0	0	0	0	1	0	0	0	0	0	0	0	0	0	0	0	0	0	0	0	0	0	0	0	0	1	2	0	0	0	0	0	0
Basidiomycota	Agaricomycetes	Russulales	Russulaceae	Russula	EcM	ITS1_00264	0	0	0	0	0	0	0	0	0	0	0	0	0	0	0	0	2	0	0	0	0	0	0	0	0	0	1	6	719	0	0	0	0	0	0	0	0	0	0	0	0	0	0
Basidiomycota	Agaricomycetes	Russulales	Russulaceae	Russula	EcM	ITS1_00265	0	1	0	345	0	0	0	0	0	0	0	0	1	0	0	1	0	81	0	0	0	0	0	0	0	84	0	0	1	0	0	0	119	0	0	0	0	0	0	0	0	0	0
Ascomycota	Dothideomycetes			Spegazzinia	NM	ITS1_00266	0	0	0	0	2	1	0	306	0	0	0	0	1	22	0	1	0	0	0	0	0	0	0	0	0	0	0	0	0	0	0	0	0	2	1	0	365	0	0	0	0	0	15
Basidiomycota	Agaricomycetes	Agaricales	Inocybaceae	Inocybe	EcM	ITS1_00267	0	0	0	0	0	0	0	0	0	0	0	0	0	0	0	0	0	0	0	0	0	0	0	0	0	1	0	1	77	0	0	0	0	0	0	0	0	0	0	0	0	0	0
Ascomycota	Sordariomycetes	Hypocreales			NM	ITS1_00268	0	1	1	14	0	0	0	0	2	4	0	1	3	0	0	0	17	3	0	0	0	5	2	4	1	357	243	58	2	0	0	0	0	0	0	0	0	0	0	0	0	0	0
Basidiomycota	Agaricomycetes	Atheliales	Atheliaceae		EcM	ITS1_00270	0	0	0	0	0	1	0	0	0	0	0	0	0	0	0	0	0	3	0	0	0	0	574	0	0	1	1	79	1	0	0	0	0	0	0	0	0	0	0	0	0	0	0
Ascomycota	Sordariomycetes	Magnaporthales	Magnaporthaceae	Mycoleptodiscus	NM	ITS1_00271	0	0	0	0	0	0	42	0	98	1	0	6	0	158	189	0	0	0	0	0	0	0	0	0	0	0	0	0	0	0	0	0	0	0	0	15	0	49	1	0	0	0	38
Basidiomycota	Agaricomycetes	Agaricales	Agaricaceae	Cystolepiota	NM	ITS1_00272	0	0	0	0	0	0	0	0	0	0	0	0	0	0	0	0	0	0	0	0	0	0	0	0	0	0	0	0	0	702	1	0	1	0	0	0	1	1	0	1	0	0	0
Basidiomycota	Agaricomycetes	Russulales	Russulaceae		EcM	ITS1_00273	0	0	0	0	0	1	0	0	0	0	0	0	0	0	0	0	0	0	0	11	120	0	0	2	0	0	0	1	0	0	0	0	0	0	0	0	0	0	0	0	0	0	0
Basidiomycota	Agaricomycetes	Russulales	Russulaceae	Russula	EcM	ITS1_00274	0	0	0	5	1	0	321	0	0	0	2	1	2	0	1	2	0	0	0	0	0	0	0	0	0	0	0	0	0	0	0	0	8	2	0	353	1	0	0	0	1	1	2
Basidiomycota	Agaricomycetes	Russulales	Russulaceae	Russula	EcM	ITS1_00275	0	0	0	0	0	1	0	0	0	0	0	0	0	0	0	0	0	701	0	0	0	0	0	1	0	0	1	0	1	0	0	0	0	0	0	0	0	0	0	0	0	0	0
Basidiomycota	Agaricomycetes	Russulales	Russulaceae		EcM	ITS1_00276	0	0	0	0	0	0	0	1	0	0	0	489	1	0	1	1	0	0	0	0	0	0	0	0	0	0	0	0	0	0	0	0	4	1	0	0	1	1	0	0	199	0	0
Ascomycota	Pezizomycetes				NM	ITS1_00277	0	0	0	0	0	1	0	0	0	0	0	0	0	0	0	0	23	52	1	334	12	0	0	1	12	78	12	60	0	0	0	0	0	0	0	0	0	0	0	0	0	0	0
Basidiomycota	Agaricomycetes	Agaricales	Cortinariaceae	Cortinarius	EcM	ITS1_00278	2	0	0	150	0	0	0	0	0	1	0	0	1	0	0	0	0	0	0	0	0	0	0	0	0	0	0	0	0	0	0	0	532	1	0	0	1	0	0	0	0	0	0
Basidiomycota	Agaricomycetes	Agaricales			EcM	ITS1_00279	0	0	0	0	0	0	0	0	0	0	0	0	0	0	0	0	0	3	3	244	333	0	2	3	0	0	0	7	1	0	0	0	0	0	0	0	0	0	0	0	0	0	0
Basidiomycota	Agaricomycetes	Russulales	Russulaceae	Russula	EcM	ITS1_00280	0	0	0	3	1	0	0	0	56	1	1	1	2	617	0	1	0	0	0	0	0	0	0	0	0	0	0	0	0	0	0	0	0	0	0	0	0	0	0	0	0	0	0
Basidiomycota	Agaricomycetes	Boletales	Sclerodermataceae	Scleroderma	EcM	ITS1_00281	66	0	0	1	96	24	0	251	0	0	0	1	0	1	3	0	0	0	2	0	0	0	0	0	0	1	0	0	0	24	0	0	0	54	8	1	149	0	1	0	0	0	0
Basidiomycota	Agaricomycetes	Russulales	Russulaceae	Russula	EcM	ITS1_00282	0	0	0	0	0	0	0	0	0	0	0	0	0	0	0	0	0	680	0	0	0	0	1	0	0	0	0	0	0	0	0	0	0	0	0	0	0	0	0	0	0	0	0
Basidiomycota	Agaricomycetes	Russulales	Russulaceae	Russula	EcM	ITS1_00283	2	0	0	3	0	0	0	0	1	470	1	1	1	1	1	2	0	0	0	0	0	0	0	0	0	0	0	0	0	0	0	0	0	0	0	0	0	0	196	0	0	0	0
Ascomycota	Saccharomycetes	Saccharomycetales	Dipodascaceae	Basidioascus	NM	ITS1_00284	2	0	0	1	152	136	3	117	0	1	0	0	0	0	0	0	1	0	0	1	0	0	1	0	1	0	0	0	0	4	0	0	2	124	31	0	95	0	0	0	0	0	0
Basidiomycota	Agaricomycetes	Agaricales	Inocybaceae	Inocybe	EcM	ITS1_00285	1	0	0	0	0	0	0	11	0	1	0	2	2	312	1	2	0	0	0	0	0	0	0	0	0	0	0	0	0	1	0	0	0	0	0	0	22	0	0	0	0	0	314
Basidiomycota	Agaricomycetes	Agaricales	Agaricaceae	Agaricus	NM	ITS1_00286	0	1	0	664	0	0	0	0	0	1	1	0	0	1	1	0	0	0	0	0	0	0	0	0	0	0	0	0	0	0	0	0	0	0	0	0	0	0	0	0	0	0	0
Basidiomycota	Agaricomycetes	Russulales	Russulaceae	Russula	EcM	ITS1_00287	1	0	0	1	195	111	0	0	0	0	1	0	0	0	0	0	0	0	0	0	0	0	2	0	0	0	0	2	0	0	0	0	1	260	90	1	0	0	0	0	0	0	0
Basidiomycota	Agaricomycetes	Russulales	Russulaceae	Russula	EcM	ITS1_00289	0	0	0	0	0	0	0	0	0	0	0	0	0	0	0	0	3	0	0	1	0	0	0	0	0	0	1	603	3	0	0	0	0	0	0	0	0	0	0	0	0	0	0
Basidiomycota	Agaricomycetes	Russulales	Russulaceae	Russula	EcM	ITS1_00290	0	0	0	0	0	0	0	0	0	0	0	0	0	0	0	0	0	0	0	0	0	0	0	0	0	0	0	0	0	1	0	0	2	2	0	0	1	0	2	2	642	14	0
Basidiomycota	Agaricomycetes	Russulales	Russulaceae		EcM	ITS1_00291	1	0	0	0	0	0	0	0	0	0	0	0	0	0	0	0	453	10	1	1	0	0	1	3	0	1	8	5	2	0	0	0	0	0	0	0	0	0	0	0	0	0	0
Basidiomycota	Agaricomycetes	Agaricales	Cortinariaceae		EcM	ITS1_00292	0	0	0	0	0	0	0	0	0	0	0	0	0	0	0	0	0	0	0	0	0	0	292	0	0	0	0	2	0	0	0	0	0	0	0	0	0	0	0	0	0	0	0
Basidiomycota	Agaricomycetes	Russulales	Russulaceae	Russula	EcM	ITS1_00293	0	0	0	8	0	0	0	0	0	0	0	0	0	0	0	0	4	340	0	0	0	0	0	0	0	111	1	4	1	0	0	0	7	0	0	0	0	0	0	0	0	0	0
Basidiomycota	Agaricomycetes	Russulales	Russulaceae		EcM	ITS1_00294	0	0	0	0	0	0	0	0	0	0	0	0	0	0	0	0	0	0	0	0	1	0	0	0	0	280	2	5	3	0	0	0	0	0	0	0	0	0	0	0	0	0	0
Basidiomycota	Agaricomycetes	Russulales	Russulaceae	Russula	EcM	ITS1_00295	0	0	0	1	0	0	0	0	0	0	0	0	0	0	0	0	0	651	0	0	0	0	2	0	0	1	0	2	1	0	0	0	0	0	0	0	0	0	0	0	0	0	0
Basidiomycota	Agaricomycetes	Thelephorales	Thelephoraceae		EcM	ITS1_00296	2	0	0	1	3	0	0	1	0	3	0	269	3	222	1	0	0	0	0	0	0	0	0	0	0	0	0	0	0	0	0	0	1	0	0	0	1	0	0	0	102	1	44
Ascomycota	Sordariomycetes	Hypocreales	Hypocreaceae	Trichoderma	NM	ITS1_00297	111	5	0	30	0	3	6	1	40	1	0	0	0	0	10	3	30	0	0	0	0	21	5	24	235	51	72	8	0	0	0	0	0	0	0	0	0	0	0	0	0	0	0
Basidiomycota	Agaricomycetes	Russulales	Russulaceae		EcM	ITS1_00301	0	0	0	369	0	0	0	0	0	0	0	0	0	1	0	0	0	0	0	0	0	0	0	0	0	1	0	0	0	0	0	0	274	0	0	0	0	0	0	0	0	1	0
Ascomycota	Sordariomycetes	Hypocreales	Hypocreaceae	Trichoderma	NM	ITS1_00302	1	0	0	0	1	0	21	0	18	2	0	1	77	0	0	0	333	15	0	11	21	0	0	0	2	13	116	14	1	0	0	0	0	0	0	0	0	0	0	0	0	0	0
Ascomycota	Eurotiomycetes	Eurotiales	Trichocomaceae	Penicillium	NM	ITS1_00303	0	0	0	0	0	0	0	0	0	1	0	0	122	0	0	1	12	0	2	0	0	418	8	0	30	1	46	2	1	0	0	0	0	0	0	0	0	0	0	0	0	0	0
Basidiomycota	Agaricomycetes	Cantharellales	Cantharellaceae		EcM	ITS1_00304	0	0	0	0	0	0	0	0	0	0	0	0	0	0	0	0	0	0	0	395	0	0	0	0	0	0	0	0	0	0	0	0	0	0	0	0	0	0	0	0	0	0	0
Ascomycota	Eurotiomycetes	Chaetothyriales	Herpotrichiellaceae	Cladophialophora	NM	ITS1_00305	0	0	0	0	0	0	0	0	0	0	0	0	19	0	1	0	32	24	1	1	2	0	0	0	0	132	219	88	1	0	0	0	0	0	0	0	0	0	0	0	0	2	0
Basidiomycota	Agaricomycetes	Russulales	Russulaceae	Russula	EcM	ITS1_00306	0	0	0	0	0	0	1	0	0	0	1	0	0	0	0	0	3	13	0	1	0	1	0	365	0	1	2	0	0	0	0	0	0	0	0	1	0	0	1	0	0	0	0
Basidiomycota	Agaricomycetes	Atheliales	Atheliaceae		EcM	ITS1_00307	0	0	0	0	0	0	0	0	0	0	0	0	0	0	0	0	1	1	1	0	0	0	320	0	0	0	17	54	2	0	0	0	0	0	0	0	0	0	0	0	0	0	0
Basidiomycota	Agaricomycetes	Russulales	Russulaceae	Russula	EcM	ITS1_00309	1	0	0	2	0	0	0	1	314	0	2	0	0	1	0	1	0	0	0	0	0	0	0	0	0	0	0	0	0	0	0	0	1	1	0	0	0	312	0	0	0	0	0
Ascomycota	Eurotiomycetes	Eurotiales	Trichocomaceae	Paecilomyces	NM	ITS1_00310	0	0	0	0	0	0	0	0	0	0	0	0	17	0	0	3	459	5	11	4	0	27	1	2	73	11	20	3	0	0	0	0	0	0	0	0	0	0	0	0	0	0	0
Basidiomycota	Agaricomycetes	Atheliales	Atheliaceae	Byssocorticium	EcM	ITS1_00311	0	0	0	0	0	0	0	0	0	0	0	0	0	0	0	0	28	2	0	0	0	1	0	6	16	1	2	519	3	0	0	0	0	0	0	0	0	0	0	0	0	0	0
Basal lineages7	Fungi_other				NM	ITS1_00312	4	0	0	45	37	28	0	52	0	1	100	268	6	4	0	0	0	3	0	0	0	0	0	0	0	1	63	3	2	0	0	0	2	0	0	0	8	0	1	3	1	2	0
Basidiomycota	Agaricomycetes	Russulales	Russulaceae	Russula	EcM	ITS1_00313	1	1	0	623	0	0	1	1	0	0	0	0	0	1	0	0	0	0	0	0	0	0	0	0	0	0	0	0	0	0	0	0	6	0	0	0	0	0	0	0	0	0	0
Basidiomycota	Agaricomycetes	Thelephorales	Thelephoraceae	Tomentella	EcM	ITS1_00315	1	0	0	1	255	175	1	2	0	0	0	0	0	0	1	0	1	1	1	0	1	0	2	4	2	0	1	1	0	1	0	0	0	130	43	2	1	0	0	0	0	0	0
Basidiomycota	Agaricomycetes	Thelephorales	Thelephoraceae	Tomentella	EcM	ITS1_00317	1	1	0	134	0	0	0	0	0	0	1	0	0	0	1	0	2	30	0	0	0	0	0	21	0	86	3	12	1	0	0	0	213	1	0	0	1	0	0	0	0	0	0
Basidiomycota	Agaricomycetes	Thelephorales	Thelephoraceae		EcM	ITS1_00319	0	1	0	1	294	186	0	0	0	0	0	0	0	1	0	0	0	0	0	0	0	1	3	2	1	1	0	1	2	1	0	0	0	104	22	0	0	0	0	0	0	0	0
Basidiomycota	Agaricomycetes	Russulales	Russulaceae	Russula	EcM	ITS1_00320	0	0	0	0	0	0	0	0	0	0	0	0	0	0	0	0	0	0	0	0	0	0	0	0	0	0	0	0	468	0	0	0	0	0	0	0	0	0	0	0	0	0	0
Ascomycota	Eurotiomycetes	Chaetothyriales	Herpotrichiellaceae	Cladophialophora	NM	ITS1_00321	0	2	0	0	32	18	88	11	6	0	1	1	3	335	0	1	0	0	0	0	0	0	0	2	0	0	1	1	1	0	0	0	0	10	2	27	2	4	0	0	0	1	72
Ascomycota	Sordariomycetes	Hypocreales	Hypocreaceae	Trichoderma	NM	ITS1_00322	0	0	0	1	0	0	1	0	13	11	6	1	0	0	0	0	302	21	1	0	0	3	1	0	23	151	69	18	0	0	0	0	0	0	0	0	0	0	0	0	0	0	0
Basidiomycota	Agaricomycetes	Agaricales	Inocybaceae		EcM	ITS1_00323	0	0	0	0	0	0	0	0	0	0	0	0	0	0	8	0	0	0	0	0	0	0	0	0	0	0	0	0	0	0	0	0	0	0	0	0	1	0	0	0	0	0	0
Basidiomycota	Agaricomycetes	Cantharellales	Cantharellaceae		EcM	ITS1_00324	0	0	0	0	0	1	0	0	0	0	0	0	0	0	0	0	1	15	0	0	0	2	0	0	0	293	23	1	0	0	0	0	0	0	0	0	0	0	0	0	0	0	0
Basidiomycota	Agaricomycetes	Thelephorales	Thelephoraceae		EcM	ITS1_00327	0	0	0	0	0	0	1	1	0	0	4	384	0	1	3	0	0	0	0	0	0	0	0	0	0	0	0	0	0	0	0	0	1	0	0	0	1	0	1	0	202	1	1
Ascomycota	Eurotiomycetes	Chaetothyriales			NM	ITS1_00328	0	0	0	0	0	0	0	0	0	0	0	0	0	0	0	0	0	0	1	0	0	1	0	0	0	0	0	1	484	0	0	0	0	0	0	0	0	0	0	0	0	0	0
Basidiomycota	Agaricomycetes	Thelephorales	Thelephoraceae		EcM	ITS1_00329	0	0	0	0	0	1	0	0	0	0	0	0	0	0	0	0	0	1	0	0	2	0	2	541	4	0	0	0	0	0	0	0	0	0	0	0	0	0	0	0	0	0	0
Basidiomycota	Agaricomycetes	Russulales	Russulaceae		EcM	ITS1_00330	0	0	0	0	0	0	2	0	0	0	0	0	0	0	0	0	0	0	0	0	0	0	0	190	0	1	0	356	1	0	0	0	0	0	0	1	0	0	0	0	0	0	1
Basidiomycota	Agaricomycetes	Russulales	Russulaceae	Russula	EcM	ITS1_00331	0	0	0	0	0	0	0	0	0	0	0	0	0	0	0	0	0	1	0	0	0	0	0	0	0	0	1	69	0	0	0	0	0	0	0	0	0	0	0	0	0	0	0
Basidiomycota	Agaricomycetes	Agaricales	Hygrophoraceae	Cuphophyllus	NM	ITS1_00332	0	0	0	1	0	0	0	0	0	0	0	0	0	0	1	461	0	0	0	0	0	0	0	0	0	0	0	0	0	0	0	0	0	0	0	0	0	0	0	0	0	0	0
Ascomycota	Eurotiomycetes	Eurotiales	Trichocomaceae	Penicillium	NM	ITS1_00333	0	0	0	1	0	0	0	0	3	142	107	0	0	0	0	0	0	0	0	0	0	0	0	0	0	0	0	0	0	0	0	0	1	0	0	0	1	8	255	78	0	0	0
Basidiomycota	Fungi_other				NM	ITS1_00334	0	0	0	0	1	0	0	271	0	1	0	0	0	0	0	0	0	0	0	0	0	0	0	0	0	0	0	0	0	0	0	0	0	1	0	0	319	0	0	0	0	0	0
Basidiomycota	Agaricomycetes	Agaricales	Clavariaceae	Clavaria	NM	ITS1_00335	0	0	0	0	0	0	0	0	0	0	0	0	0	564	1	4	0	0	0	0	0	0	0	0	0	0	0	0	0	0	0	0	0	0	0	0	0	0	0	0	0	0	26
Basidiomycota	Agaricomycetes	Agaricales			EcM	ITS1_00336	0	0	0	1	0	0	49	0	2	0	0	1	2	531	2	0	0	0	0	0	0	0	0	0	1	0	0	0	0	0	0	0	0	0	0	0	0	0	0	0	0	0	0
Basidiomycota	Agaricomycetes	Agaricales	Inocybaceae	Inocybe	EcM	ITS1_00337	0	0	0	0	0	0	0	0	0	0	0	1	0	178	0	0	0	0	0	0	0	0	0	0	0	0	0	0	0	1	0	0	0	1	0	0	1	0	0	0	0	0	406
Ascomycota	Eurotiomycetes	Eurotiales	Trichocomaceae		NM	ITS1_00339	0	0	0	0	0	0	0	0	0	0	0	0	0	0	0	0	2	0	0	0	0	1	0	0	7	0	0	0	0	0	0	0	0	0	0	0	0	0	0	0	0	9	0
Basidiomycota	Agaricomycetes	Agaricales	Cortinariaceae	Cortinarius	EcM	ITS1_00340	0	0	0	9	0	0	0	0	0	0	0	0	0	0	0	0	5	334	0	0	0	0	4	0	1	13	2	0	1	0	0	0	7	0	0	0	0	0	0	0	0	0	0
Basidiomycota	Agaricomycetes	Cantharellales	Cantharellaceae	Pseudocraterellus	EcM	ITS1_00341	0	0	0	0	0	0	0	0	0	0	0	0	0	0	0	0	5	21	0	554	0	0	1	1	0	1	0	0	0	0	0	0	0	0	0	0	0	0	0	0	0	0	0
Basidiomycota	Agaricomycetes	Agaricales	Cortinariaceae	Cortinarius	EcM	ITS1_00342	0	0	0	0	0	1	0	0	0	0	0	0	0	0	0	0	2	1	0	1	0	54	282	2	0	0	1	5	0	0	0	0	0	0	0	0	0	0	0	0	0	0	0
Basidiomycota	Agaricomycetes	Sebacinales			NM	ITS1_00343	0	0	0	0	0	0	0	0	0	0	0	0	0	0	0	0	0	0	1	0	0	0	0	0	0	0	0	0	425	0	0	0	0	0	0	0	0	0	0	0	0	0	0
Basidiomycota	Agaricomycetes	Russulales	Russulaceae	Russula	EcM	ITS1_00344	0	0	0	0	0	0	0	0	0	0	0	0	0	0	0	0	2	1	0	0	0	0	2	0	0	462	1	13	4	0	0	0	0	0	0	0	0	0	0	0	0	0	0
Basidiomycota	Agaricomycetes	Cantharellales	Clavulinaceae		EcM	ITS1_00345	1	0	0	0	0	0	0	0	0	0	0	0	0	0	0	0	59	511	0	0	0	0	3	1	0	1	0	0	1	0	0	0	0	0	0	0	0	0	0	0	0	0	0
Basidiomycota	Agaricomycetes	Agaricales	Hygrophoraceae	Camarophyllus	NM	ITS1_00346	0	0	0	0	0	0	0	0	0	0	0	0	0	0	0	0	0	0	0	0	0	0	0	0	0	0	0	0	0	0	0	0	0	0	1	0	0	0	0	0	0	0	0
Basidiomycota	Agaricomycetes	Agaricales	Hygrophoraceae	Hygrocybe	NM	ITS1_00347	0	0	0	0	0	0	0	0	0	0	0	0	0	0	0	12	0	0	0	0	0	0	0	0	0	0	0	0	0	0	0	0	0	0	0	1	3	0	0	0	0	0	1
Basidiomycota	Agaricomycetes	Russulales	Russulaceae	Russula	EcM	ITS1_00348	0	0	0	0	0	0	0	0	0	0	0	0	0	0	0	0	3	5	0	0	0	0	0	0	0	2	455	12	6	0	0	0	0	0	0	0	0	0	0	0	0	0	0
Basidiomycota	Agaricomycetes	Cantharellales	Cantharellaceae		EcM	ITS1_00349	1	0	0	223	0	0	0	0	0	1	0	0	0	0	0	0	0	0	0	0	0	0	0	0	0	0	0	0	0	0	0	0	342	0	0	0	1	0	0	0	0	0	0
Basidiomycota	Agaricomycetes	Cantharellales	Clavulinaceae		EcM	ITS1_00350	0	0	0	0	0	0	0	1	0	0	0	208	0	0	0	2	0	0	0	0	0	0	0	0	0	0	0	0	0	0	0	0	0	0	0	0	0	0	9	0	345	1	0
Ascomycota	Sordariomycetes	Hypocreales	Clavicipitaceae		NM	ITS1_00351	0	0	2	0	0	0	0	0	0	0	0	0	36	0	0	1	303	3	1	1	0	15	7	0	22	39	122	10	2	0	0	0	0	0	0	0	0	0	0	0	0	0	0
Basidiomycota	Agaricomycetes	Agaricales	Agaricaceae	Cystolepiota	NM	ITS1_00353	565	0	0	0	1	0	0	0	0	0	0	0	1	0	0	0	0	0	0	0	0	0	0	0	0	0	0	0	0	0	0	0	0	0	0	0	0	0	0	0	0	0	0
Basidiomycota	Fungi_other				NM	ITS1_00355	0	1	0	0	0	0	0	0	0	0	0	0	0	0	0	166	0	0	0	0	0	0	0	0	0	0	0	0	0	0	0	0	0	0	0	0	0	0	0	1	0	0	0
Basidiomycota	Agaricomycetes	Agaricales			NM	ITS1_00356	0	0	0	0	0	0	0	0	0	0	0	0	0	0	0	0	0	0	0	0	0	0	488	1	0	0	0	0	0	0	0	0	0	0	0	0	0	0	0	0	0	0	0
Basidiomycota	Agaricomycetes	Agaricales	Cortinariaceae	Cortinarius	EcM	ITS1_00357	0	0	0	0	0	0	0	0	0	0	0	0	0	0	0	0	1	2	1	267	185	0	2	0	0	0	0	2	0	0	0	0	0	0	0	0	0	0	0	0	0	0	0
Basidiomycota	Agaricomycetes	Agaricales	Tricholomataceae	Clitocybe	NM	ITS1_00358	0	0	0	0	0	0	0	0	0	0	0	0	0	0	0	0	0	1	0	0	0	0	0	0	0	0	0	2	337	0	0	0	0	0	0	0	0	0	0	0	0	0	0
Basidiomycota	Agaricomycetes	Agaricales	Marasmiaceae	Marasmiellus	NM	ITS1_00359	0	0	0	0	0	0	0	0	0	0	0	0	0	0	0	0	0	0	0	0	0	0	0	0	0	0	0	0	0	0	0	0	0	1	0	0	0	0	0	0	0	0	0
Basidiomycota	Agaricomycetes	Sebacinales			NM	ITS1_00360	0	0	0	0	0	0	0	0	0	0	0	0	0	0	0	0	1	0	2	39	457	0	29	1	0	26	0	1	2	0	0	0	0	0	0	0	0	0	0	0	0	0	0
Basidiomycota	Agaricomycetes	Russulales	Russulaceae	Russula	EcM	ITS1_00361	0	0	0	0	0	0	0	0	0	0	0	0	0	0	0	0	0	1	0	0	0	0	0	0	0	0	0	439	4	0	0	0	0	0	0	0	0	0	0	0	0	0	0
Ascomycota	Eurotiomycetes	Onygenales			NM	ITS1_00362	0	0	0	0	0	0	408	0	0	0	1	0	0	3	3	1	0	0	0	0	0	1	0	0	0	0	0	0	0	0	0	0	0	0	0	125	14	0	0	0	0	0	0
Basidiomycota	Agaricomycetes	Agaricales	Hygrophoraceae	Hygrocybe	NM	ITS1_00363	0	0	0	0	0	0	0	0	0	0	0	0	0	0	0	0	0	0	0	0	0	0	0	0	0	0	0	0	0	0	0	0	0	0	0	0	558	0	0	0	0	0	0
Basidiomycota	Agaricomycetes	Cantharellales	Cantharellaceae	Pseudocraterellus	EcM	ITS1_00364	0	0	0	0	0	0	0	0	0	0	0	0	0	0	0	0	44	137	0	15	0	1	0	0	36	0	0	2	1	0	0	0	0	0	0	0	0	0	0	0	0	0	0
Basidiomycota	Agaricomycetes	Russulales	Russulaceae	Lactarius	EcM	ITS1_00365	0	0	0	231	0	0	0	1	0	1	1	0	0	1	0	0	0	0	0	0	0	0	0	0	0	0	0	0	0	0	0	0	320	0	0	0	0	0	0	0	0	0	0
Basidiomycota	Agaricomycetes	Agaricales	Cortinariaceae	Cortinarius	EcM	ITS1_00366	0	0	0	0	0	0	0	0	0	0	0	0	0	0	0	0	0	2	1	105	324	0	2	2	0	1	1	2	0	0	0	0	0	0	0	0	0	0	0	0	0	0	0
Basidiomycota	Agaricomycetes	Russulales	Russulaceae	Russula	EcM	ITS1_00367	0	0	0	2	127	90	0	0	0	0	0	1	1	0	0	0	0	3	0	0	0	0	1	2	0	1	1	2	0	0	0	0	7	231	73	0	0	0	0	0	0	1	0
Ascomycota	Fungi_other				NM	ITS1_00368	3	62	38	2	7	7	47	0	2	0	0	1	2	259	0	2	0	1	1	0	0	1	0	6	1	2	0	0	0	0	3	2	1	0	1	49	0	0	0	0	0	0	49
Basidiomycota	Agaricomycetes	Agaricales			NM	ITS1_00369	0	20	4	0	0	0	0	0	0	0	0	0	0	0	0	1	0	1	0	0	0	0	0	0	0	0	0	0	0	0	321	119	0	0	0	0	0	1	0	0	0	0	0
Mortierellomycota	Mortierellomycetes	Mortierellales			NM	ITS1_00370	0	0	0	0	1	0	0	0	0	0	0	1	0	2	499	4	0	0	0	0	0	0	0	0	0	0	0	0	0	0	0	0	0	0	0	0	0	0	0	0	0	0	0
Basidiomycota	Agaricomycetes	Cantharellales	Cantharellaceae		EcM	ITS1_00371	0	0	0	205	0	0	0	0	0	0	0	0	0	0	0	0	0	0	0	0	0	0	0	0	0	0	0	0	0	0	0	0	341	0	0	0	0	0	0	0	0	0	0
Basidiomycota	Agaricomycetes	Russulales	Russulaceae	Russula	EcM	ITS1_00372	0	0	0	0	0	0	0	0	0	0	0	0	0	0	0	0	0	0	1	0	0	12	1	0	0	0	0	421	2	0	0	0	0	0	0	0	0	0	0	0	0	0	0
Basidiomycota	Agaricomycetes	Russulales	Russulaceae	Russula	EcM	ITS1_00373	0	0	0	2	0	0	0	0	0	0	0	0	469	0	1	0	0	0	0	0	0	0	0	0	0	0	0	0	0	0	0	0	0	0	0	0	0	0	0	0	0	77	0
Basidiomycota	Agaricomycetes	Russulales	Russulaceae	Russula	EcM	ITS1_00375	0	0	0	0	0	0	0	0	0	1	2	2	9	0	0	0	0	0	0	0	0	0	0	0	0	0	0	0	0	0	0	0	1	0	0	0	0	0	114	222	105	90	0
Basidiomycota	Agaricomycetes	Agaricales	Inocybaceae		EcM	ITS1_00376	1	0	0	0	0	0	0	0	0	0	0	0	0	1	542	0	0	0	0	0	0	0	0	0	0	0	0	0	0	0	0	0	0	0	0	0	0	0	0	0	0	0	0
Basidiomycota	Agaricomycetes	Russulales	Russulaceae	Russula	EcM	ITS1_00377	0	0	0	0	0	0	0	0	0	0	0	0	0	0	0	0	0	4	2	39	213	0	271	2	0	0	0	7	0	0	0	0	0	0	0	0	0	0	0	0	0	0	0
Basidiomycota	Agaricomycetes	Agaricales	Hygrophoraceae	Hygrocybe	NM	ITS1_00379	0	0	0	0	0	0	2	1	0	0	0	1	1	0	0	482	0	0	0	0	0	0	0	0	0	0	0	0	0	0	0	0	0	0	0	0	0	0	0	0	0	0	0
Ascomycota	Leotiomycetes			Geomyces	NM	ITS1_00380	0	0	0	0	0	0	0	0	0	0	0	0	0	0	0	0	1	0	0	0	0	2	0	0	1	1	5	0	1	0	0	0	0	0	0	0	0	0	0	0	0	21	0
Basidiomycota	Agaricomycetes	Agaricales	Hygrophoraceae	Hygrocybe	NM	ITS1_00381	0	0	0	0	0	0	0	0	0	0	0	0	0	1	1	495	0	0	0	0	0	0	0	0	1	0	0	0	0	0	0	0	1	0	0	0	0	0	0	0	0	0	0
Basidiomycota	Agaricomycetes	Trechisporales			NM	ITS1_00382	172	62	25	147	2	0	0	2	0	0	2	1	0	2	0	2	0	0	0	0	0	0	0	0	0	0	0	0	0	46	14	4	50	0	0	0	0	0	0	0	0	0	0
Basidiomycota	Agaricomycetes	Thelephorales	Thelephoraceae	Pseudotomentella	EcM	ITS1_00383	0	0	0	0	0	0	0	0	0	0	0	0	0	0	0	0	0	0	0	0	0	0	0	0	0	0	0	0	0	0	0	1	0	0	0	0	0	0	0	0	0	0	0
Basidiomycota	Agaricomycetes	Russulales	Russulaceae	Russula	EcM	ITS1_00384	1	0	0	488	0	0	0	1	0	1	0	0	0	0	0	0	0	0	0	0	0	0	0	0	0	0	0	0	0	0	0	0	39	0	0	0	0	0	0	0	0	0	0
Basidiomycota	Fungi_other				NM	ITS1_00385	2	0	0	452	0	0	0	1	0	1	1	0	0	1	0	0	0	0	0	0	0	0	0	0	0	0	0	0	0	0	0	0	67	0	0	0	0	0	0	0	0	0	0
Basidiomycota	Agaricomycetes	Thelephorales	Thelephoraceae	Tomentella	EcM	ITS1_00386	0	0	0	0	0	2	0	0	0	0	0	0	0	0	0	0	0	1	0	4	0	7	32	1	18	0	14	345	2	0	0	0	0	0	0	0	0	0	0	0	0	0	0
Basidiomycota	Agaricomycetes	Agaricales	Cortinariaceae	Cortinarius	EcM	ITS1_00387	0	0	0	0	0	0	0	0	0	0	0	0	0	0	0	0	0	0	1	28	77	0	0	0	0	0	0	0	1	0	0	0	0	0	0	0	0	0	0	0	0	0	0
Basidiomycota	Agaricomycetes	Trechisporales			NM	ITS1_00388	0	0	0	0	0	0	0	0	0	0	0	0	0	0	0	0	1	3	521	0	0	0	0	0	0	0	0	0	0	0	0	0	0	0	0	0	0	0	0	0	0	0	0
Basidiomycota	Agaricomycetes	Agaricales	Cortinariaceae	Cortinarius	EcM	ITS1_00389	0	0	0	0	0	0	0	0	0	0	0	0	0	0	0	0	0	35	0	0	2	38	445	1	0	0	0	1	1	0	0	0	0	0	0	0	0	0	0	0	0	0	0
Basidiomycota	Agaricomycetes	Agaricales	Strophariaceae	Anamika	EcM	ITS1_00390	0	0	0	0	0	0	0	0	0	0	0	0	0	0	0	0	0	0	0	0	0	14	0	0	1	0	0	0	0	0	0	0	0	0	0	0	0	0	0	0	0	0	0
Basidiomycota	Agaricomycetes	Thelephorales	Thelephoraceae	Tomentella	EcM	ITS1_00391	0	1	0	327	0	0	0	0	0	0	0	0	1	0	0	1	0	24	0	0	1	0	0	0	1	31	7	48	0	0	0	0	46	0	0	0	1	0	0	0	0	0	0
Basidiomycota	Agaricomycetes	Agaricales	Cortinariaceae	Cortinarius	EcM	ITS1_00392	0	0	0	0	0	0	0	0	0	0	0	0	0	0	0	0	1	2	1	1	316	0	2	1	1	0	0	1	0	0	0	0	0	0	0	0	0	0	0	0	0	0	0
Basidiomycota	Agaricomycetes	Cantharellales	Clavulinaceae	Clavulina	EcM	ITS1_00393	0	0	0	0	0	1	0	0	0	0	0	0	0	0	0	0	218	0	1	0	0	0	1	1	0	0	21	270	5	0	0	0	0	0	0	0	0	0	0	0	0	0	0
Basidiomycota	Agaricomycetes	Russulales	Russulaceae		EcM	ITS1_00394	0	0	0	0	0	0	0	0	0	0	0	0	0	0	0	0	0	94	0	0	0	0	0	2	0	0	3	418	1	0	0	0	0	0	0	0	0	0	0	0	0	0	0
Basidiomycota	Agaricomycetes	Russulales	Russulaceae	Lactarius	EcM	ITS1_00395	0	0	0	141	0	0	0	0	0	0	0	0	0	0	0	0	4	131	0	0	16	0	1	0	1	27	117	1	1	0	0	0	2	0	0	0	0	0	0	0	0	0	0
Basidiomycota	Agaricomycetes	Agaricales	Entolomataceae	Clitopilus	NM	ITS1_00396	0	0	0	1	0	0	0	0	0	0	0	0	0	0	257	0	0	0	0	0	0	0	0	0	0	0	0	0	0	1	0	0	0	0	0	1	0	0	0	0	0	0	0
Ascomycota	Eurotiomycetes	Eurotiales	Trichocomaceae	Penicillium	NM	ITS1_00397	1	0	1	0	0	0	0	0	0	0	1	0	1	0	0	0	417	0	2	0	0	68	1	0	19	0	0	0	0	0	0	0	0	0	0	0	0	0	0	0	0	0	0
Basidiomycota	Agaricomycetes	Cantharellales	Clavulinaceae	Clavulina	EcM	ITS1_00398	0	0	0	0	0	0	0	0	0	0	0	0	0	0	0	0	1	1	0	0	0	0	1	1	0	0	0	444	4	0	0	0	0	0	0	0	0	0	0	0	0	0	0
Basidiomycota	Agaricomycetes	Agaricales	Strophariaceae	Gymnopilus	NM	ITS1_00399	0	1	0	251	0	0	0	0	0	0	0	1	1	1	0	0	0	0	0	0	0	0	0	0	0	0	0	0	0	0	0	0	249	0	0	0	1	0	0	0	0	0	0
Basidiomycota	Agaricomycetes	Agaricales	Cortinariaceae	Cortinarius	EcM	ITS1_00400	1	1	0	495	0	0	0	0	0	0	2	2	0	1	1	0	0	0	0	0	0	0	0	0	0	0	0	0	0	0	0	0	2	0	0	0	0	0	0	0	0	0	0
Basidiomycota	Agaricomycetes	Russulales	Russulaceae	Russula	EcM	ITS1_00401	0	0	0	1	0	1	0	0	0	0	0	0	0	0	0	0	3	495	0	0	0	0	0	1	1	1	0	2	0	0	0	0	0	0	0	0	0	0	0	0	0	0	0
Ascomycota	Eurotiomycetes	Eurotiales	Trichocomaceae	Penicillium	NM	ITS1_00402	0	0	0	0	0	0	0	0	0	0	0	0	0	0	0	0	6	0	0	0	0	0	0	0	0	0	14	0	0	0	0	0	0	0	0	0	0	0	0	10	0	0	0
Basidiomycota	Agaricomycetes	Sebacinales			NM	ITS1_00404	0	0	0	0	0	0	0	0	0	0	0	0	0	0	0	11	0	0	53	1	0	65	303	2	0	3	0	9	4	0	0	0	0	0	0	0	0	0	0	0	0	0	0
Basidiomycota	Agaricomycetes	Agaricales	Marasmiaceae	Clitocybula	NM	ITS1_00405	0	0	0	0	0	0	0	0	0	0	1	0	0	0	272	1	0	0	0	0	0	0	0	0	0	0	0	0	0	0	0	0	0	0	0	0	0	0	0	1	0	0	0
Basidiomycota	Agaricomycetes	Agaricales	Amanitaceae	Amanita	EcM	ITS1_00406	0	0	0	0	0	0	0	0	0	0	0	0	23	0	0	1	0	0	0	286	0	0	0	0	0	0	0	0	0	0	0	0	0	0	0	0	0	0	0	0	0	17	0
Basidiomycota	Agaricomycetes	Russulales	Russulaceae	Russula	EcM	ITS1_00407	0	0	0	0	0	0	0	0	0	0	0	0	0	0	0	0	0	0	0	0	0	0	0	0	0	0	0	0	0	0	0	0	16	1	0	1	3	27	0	2	1	0	447
Basidiomycota	Agaricomycetes	Agaricales	Clavariaceae	Clavaria	NM	ITS1_00408	0	0	0	0	0	0	0	0	0	0	0	0	0	0	0	0	0	0	1	0	0	0	0	0	0	0	0	1	371	0	0	0	0	0	0	0	0	0	0	0	0	0	0
Basidiomycota	Agaricomycetes	Thelephorales	Thelephoraceae		EcM	ITS1_00409	0	0	0	0	0	0	0	0	0	0	0	0	0	0	0	0	0	2	0	0	1	11	357	2	1	0	0	0	0	0	0	0	0	0	0	0	0	0	0	0	0	0	0
Basidiomycota	Agaricomycetes	Thelephorales	Thelephoraceae		EcM	ITS1_00411	0	0	0	0	0	0	0	0	0	0	0	0	0	5	0	0	0	1	2	0	0	0	3	430	0	0	1	0	1	0	0	0	0	0	0	0	0	0	0	0	0	0	0
Mucoromycota	Mucoromycetes	Mucorales	Cunninghamellaceae	Cunninghamella	NM	ITS1_00413	0	0	0	0	0	0	0	0	1	0	0	0	0	0	0	0	0	0	0	0	0	0	0	0	0	0	0	0	0	0	0	0	0	4	1	0	1	481	1	0	0	0	0
Basidiomycota	Agaricomycetes	Russulales	Russulaceae	Russula	EcM	ITS1_00414	0	0	0	0	0	0	0	0	0	0	0	0	0	0	0	0	0	0	0	0	0	0	0	0	0	0	0	0	0	0	0	0	1	0	0	0	1	0	99	241	35	110	0
Basidiomycota	Agaricomycetes	Russulales	Russulaceae	Russula	EcM	ITS1_00415	1	0	0	144	0	0	0	0	0	0	0	0	0	0	0	0	0	0	0	0	0	0	0	0	0	0	0	0	0	1	0	0	340	0	0	0	1	0	0	0	0	0	0
Basidiomycota	Agaricomycetes	Russulales	Russulaceae	Russula	EcM	ITS1_00416	0	0	0	0	0	0	0	0	0	0	0	0	0	0	0	0	0	0	0	0	0	0	0	0	0	0	0	341	3	0	0	0	0	0	0	0	0	0	0	0	0	0	0
Basidiomycota	Agaricomycetes	Agaricales			EcM	ITS1_00418	0	0	0	0	0	0	0	0	0	0	0	0	0	0	0	0	0	2	0	114	199	0	3	1	0	0	0	1	0	0	0	0	0	0	0	0	0	0	0	0	0	0	0
Basidiomycota	Agaricomycetes	Agaricales	Inocybaceae		EcM	ITS1_00419	0	1	0	2	0	0	1	337	0	0	3	1	0	0	3	1	0	0	0	0	0	0	0	0	0	0	0	0	0	0	0	0	1	1	0	2	41	0	0	0	0	0	0
Basidiomycota	Agaricomycetes	Agaricales	Inocybaceae	Inocybe	EcM	ITS1_00422	0	0	1	0	0	1	0	0	0	0	0	0	0	0	0	0	1	3	1	0	280	1	3	0	2	1	0	0	0	0	0	0	0	0	0	0	0	0	0	0	0	0	0
Basidiomycota	Agaricomycetes	Agaricales	Psathyrellaceae	Psathyrella	NM	ITS1_00423	1	0	0	0	0	0	0	0	0	0	0	0	0	0	435	0	0	0	0	0	0	0	0	0	0	0	0	0	0	0	0	0	0	0	0	0	0	0	0	0	0	0	0
Basidiomycota	Agaricomycetes	Sebacinales			NM	ITS1_00424	0	0	0	1	0	0	0	0	0	0	0	0	0	0	0	6	0	0	132	1	0	27	184	2	0	1	1	0	2	0	0	0	0	0	0	0	0	0	0	0	0	0	0
Basidiomycota	Agaricomycetes				NM	ITS1_00427	0	0	0	235	0	0	0	1	0	0	0	0	0	0	0	10	0	14	0	0	0	0	0	0	0	1	1	0	0	0	0	0	202	0	0	0	0	0	0	0	0	0	0
Basidiomycota	Agaricomycetes	Trechisporales	Hydnodontaceae	Trechispora	NM	ITS1_00428	1	242	85	1	0	0	0	0	0	0	0	2	0	0	0	1	0	0	0	0	0	0	0	0	0	0	0	0	1	0	105	30	0	0	0	0	0	0	0	0	2	0	0
Basidiomycota	Agaricomycetes	Russulales	Russulaceae	Russula	EcM	ITS1_00429	0	0	0	6	0	0	0	0	0	0	0	0	0	0	0	0	0	0	0	0	0	0	0	0	0	0	0	0	0	0	0	0	466	0	0	0	0	0	0	0	0	0	0
Basidiomycota	Agaricomycetes	Boletales	Boletaceae		EcM	ITS1_00430	0	0	0	125	0	0	0	0	0	0	0	0	0	0	0	0	0	0	0	0	0	0	0	0	0	0	0	0	0	0	0	0	343	0	0	0	0	0	0	0	0	0	0
Ascomycota	Eurotiomycetes				NM	ITS1_00431	1	0	0	1	0	0	0	137	0	0	0	1	0	0	1	0	0	0	0	0	0	0	0	0	0	0	0	0	0	0	1	0	0	1	0	4	319	0	0	0	0	0	0
Basidiomycota	Agaricomycetes	Agaricales	Cortinariaceae		NM	ITS1_00432	0	156	59	19	0	0	0	0	0	0	1	1	1	0	0	0	0	0	0	0	1	0	0	0	0	0	0	0	0	0	144	69	13	0	0	0	0	1	0	0	0	0	0
Basidiomycota	Agaricomycetes	Polyporales	Polyporaceae	Skeletocutis	NM	ITS1_00433	0	0	0	0	0	0	0	0	0	0	0	0	0	0	0	0	0	2	0	0	0	0	2	266	0	0	0	1	0	0	0	0	0	0	0	0	0	0	0	0	0	0	0
Basidiomycota	Agaricomycetes	Russulales	Russulaceae		EcM	ITS1_00434	0	0	0	0	0	0	0	0	0	0	0	0	0	0	0	0	0	0	0	0	0	0	0	0	0	0	0	0	0	0	0	0	14	6	0	0	0	1	0	0	438	1	1
Basidiomycota	Agaricomycetes	Trechisporales	Hydnodontaceae	Trechispora	NM	ITS1_00435	0	0	0	0	1	0	0	0	0	1	0	254	0	0	0	2	0	0	0	0	0	0	0	0	0	0	0	0	0	1	0	0	1	0	0	0	0	0	0	0	205	0	0
Basidiomycota	Agaricomycetes	Thelephorales	Thelephoraceae	Tomentella	EcM	ITS1_00436	1	0	0	1	102	87	0	0	0	0	0	0	0	0	1	1	23	94	0	0	0	0	3	1	11	80	12	40	4	0	0	0	0	0	0	0	0	0	0	0	0	0	0
Ascomycota	Archaeorhizomycetes	Archaeorhizomycetales	Archaeorhizomycetaceae	Archaeorhizomyces	NM	ITS1_00437	0	0	0	0	0	0	0	0	0	0	0	0	0	0	0	73	6	0	358	0	0	0	0	0	0	0	0	0	0	0	0	0	0	0	0	0	0	0	0	0	0	0	0
Basidiomycota	Agaricomycetes	Russulales	Russulaceae	Russula	EcM	ITS1_00438	0	0	1	0	0	0	0	0	0	0	0	0	0	0	0	0	0	2	0	0	0	0	0	0	0	0	109	176	4	0	0	0	0	0	0	0	0	0	0	0	0	0	0
Basidiomycota	Agaricomycetes	Agaricales	Inocybaceae	Inocybe	EcM	ITS1_00439	0	0	0	0	0	0	0	0	0	0	0	0	0	399	0	0	0	0	0	0	0	0	0	0	0	0	0	0	0	0	0	0	0	0	0	0	0	0	0	0	0	0	59
Basidiomycota	Agaricomycetes	Agaricales	Hygrophoraceae	Hygrocybe	NM	ITS1_00440	1	0	0	0	0	0	0	1	0	0	0	1	0	214	0	1	0	0	0	0	0	0	0	0	0	0	0	0	0	0	0	0	0	0	0	1	10	0	0	0	0	0	201
Basidiomycota	Agaricomycetes	Thelephorales	Thelephoraceae	Tomentella	EcM	ITS1_00441	0	0	0	0	0	0	0	0	7	22	0	273	11	2	0	0	0	0	0	0	0	0	0	0	0	0	0	0	0	0	1	0	3	0	0	0	0	5	18	0	108	4	0
Basidiomycota	Agaricomycetes	Agaricales	Tricholomataceae	Tricholoma	EcM	ITS1_00442	1	0	0	1	0	0	0	185	0	1	0	0	0	0	1	0	0	0	0	0	0	0	0	0	0	0	0	0	0	0	0	0	0	2	0	0	263	0	0	0	0	0	0
Basidiomycota	Agaricomycetes	Thelephorales	Thelephoraceae	Tomentella	EcM	ITS1_00443	0	0	0	0	0	0	0	0	0	0	0	0	0	0	0	0	1	0	0	0	0	203	123	2	0	13	5	2	0	0	0	0	0	0	0	0	0	0	0	0	0	0	0
Basidiomycota	Agaricomycetes	Russulales	Russulaceae	Russula	EcM	ITS1_00444	4	1	0	2	21	4	1	245	1	1	0	1	2	1	0	1	0	0	0	0	0	0	0	163	0	0	0	0	0	0	0	0	0	0	0	0	1	0	0	0	0	0	0
Basidiomycota	Agaricomycetes	Sebacinales	Serendipitaceae		NM	ITS1_00445	0	0	0	0	0	0	0	0	0	0	0	0	0	0	0	0	0	1	408	0	0	0	0	0	0	0	0	0	0	0	0	0	0	0	0	0	0	0	0	0	0	0	0
Basidiomycota	Agaricomycetes	Cantharellales	Clavulinaceae		EcM	ITS1_00446	0	0	0	0	0	1	0	0	0	0	0	0	0	0	0	0	1	405	0	0	0	0	1	0	0	0	0	0	1	0	0	0	0	0	0	0	0	0	0	0	0	0	0
Basidiomycota	Agaricomycetes	Boletales	Sclerodermataceae	Scleroderma	EcM	ITS1_00447	0	0	0	2	0	0	0	0	0	7	40	366	18	1	1	2	0	0	0	0	0	0	0	0	0	0	0	0	0	0	0	0	0	0	0	0	0	0	1	1	9	3	0
Basidiomycota	Agaricomycetes	Thelephorales	Thelephoraceae	Tomentella	EcM	ITS1_00448	0	0	0	0	2	0	1	0	0	0	0	1	1	0	404	0	0	0	0	0	0	0	0	0	0	0	0	0	0	0	0	0	0	0	0	0	0	1	0	0	0	0	0
Basidiomycota	Agaricomycetes	Cantharellales	Clavulinaceae	Clavulina	EcM	ITS1_00449	0	1	0	0	1	0	0	1	419	0	2	0	0	0	0	0	0	0	0	0	0	0	0	0	0	0	0	0	0	0	0	0	0	0	0	0	0	24	0	0	0	0	0
Basidiomycota	Agaricomycetes	Agaricales	Marasmiaceae	Marasmius	NM	ITS1_00450	0	0	0	0	0	0	0	0	0	0	1	0	0	0	0	112	0	0	0	0	0	4	146	0	1	1	0	0	0	0	0	0	0	0	0	0	0	0	3	0	0	0	0
Basidiomycota	Agaricomycetes	Russulales	Russulaceae	Russula	EcM	ITS1_00451	0	1	0	0	0	0	0	0	0	0	0	0	0	0	0	0	1	435	0	0	0	0	0	1	0	3	0	0	2	0	0	0	0	0	0	0	0	0	0	0	0	0	0
Ascomycota	Eurotiomycetes	Eurotiales	Elaphomycetaceae	Elaphomyces	EcM	ITS1_00452	0	0	0	0	0	0	0	0	0	0	0	0	0	0	0	0	50	137	0	0	0	0	0	0	11	1	0	0	0	0	0	1	0	0	0	0	0	0	0	0	0	0	0
Basidiomycota	Agaricomycetes	Russulales	Russulaceae		EcM	ITS1_00455	0	0	0	0	0	0	0	0	0	0	0	0	0	0	0	0	0	105	0	1	11	0	0	0	0	0	2	0	0	0	0	0	0	0	0	0	0	0	0	0	0	0	0
Basidiomycota	Agaricomycetes	Agaricales			NM	ITS1_00456	1	0	0	1	0	0	0	168	0	3	1	1	0	0	1	0	0	0	0	0	0	0	0	0	0	0	0	0	0	0	1	0	0	0	0	0	262	0	0	0	0	0	0
Basidiomycota	Agaricomycetes	Sebacinales	Sebacinaceae		EcM	ITS1_00457	0	0	0	409	0	0	0	1	0	0	1	0	0	1	1	0	0	0	0	0	0	0	0	0	0	0	0	0	0	0	0	0	27	0	0	0	0	0	0	0	0	0	0
Basidiomycota	Agaricomycetes	Agaricales	Mycenaceae		NM	ITS1_00458	0	0	0	0	1	0	0	0	0	0	0	0	0	1	220	1	0	0	0	0	0	0	0	0	0	0	0	0	0	0	0	0	0	0	0	0	1	0	0	1	0	0	0
Basidiomycota	Agaricomycetes	Agaricales	Cortinariaceae	Cortinarius	EcM	ITS1_00459	0	0	0	0	0	0	0	0	0	0	0	0	0	0	0	0	2	2	1	0	264	0	1	0	0	0	0	0	2	0	0	0	0	0	1	0	0	0	0	0	0	0	0
Basidiomycota	Agaricomycetes	Cantharellales	Clavulinaceae		EcM	ITS1_00460	0	0	0	0	0	0	0	0	0	0	9	279	0	1	0	0	0	0	0	0	0	0	0	0	0	0	0	0	0	0	0	0	0	0	0	0	0	0	0	7	140	0	2
Basidiomycota	Agaricomycetes	Russulales	Russulaceae	Russula	EcM	ITS1_00461	0	0	0	0	0	0	0	0	0	0	0	0	0	0	0	0	11	427	0	0	0	0	0	0	0	0	0	0	0	0	0	0	0	0	0	0	0	0	0	0	0	0	0
Basidiomycota	Wallemiomycetes	Geminibasidiales	Geminibasidiaceae	Geminibasidium	NM	ITS1_00463	2	0	1	69	13	9	0	5	0	4	11	3	2	0	2	0	27	22	2	9	1	4	11	0	8	59	77	93	0	0	0	0	0	0	0	0	0	0	0	0	0	0	0
Basidiomycota	Agaricomycetes	Russulales	Russulaceae		EcM	ITS1_00465	0	0	0	0	0	0	0	0	0	0	0	0	0	0	0	0	0	0	0	0	0	1	1	432	0	0	0	0	0	0	0	0	0	0	0	0	0	0	0	0	0	0	0
Ascomycota	Eurotiomycetes	Eurotiales	Trichocomaceae	Penicillium	NM	ITS1_00466	0	0	0	0	0	0	1	0	0	15	0	0	0	0	0	0	2	0	0	0	0	1	0	0	0	0	0	0	0	0	0	0	0	0	0	0	0	0	0	0	0	0	0
Basidiomycota	Agaricomycetes	Thelephorales	Thelephoraceae		EcM	ITS1_00467	0	0	0	0	0	0	0	0	0	0	0	2	0	348	3	1	0	0	0	0	0	0	0	0	0	0	0	0	0	0	0	0	0	0	0	0	0	0	0	0	0	0	77
Mortierellomycota	Mortierellomycetes	Mortierellales	Mortierellaceae	Mortierella	NM	ITS1_00468	0	0	0	0	0	0	1	0	1	0	0	0	0	1	422	0	0	0	0	0	0	0	0	0	0	0	0	0	0	0	0	0	0	0	0	0	0	0	0	0	0	0	0
Basidiomycota	Agaricomycetes	Thelephorales	Thelephoraceae	Tomentella	EcM	ITS1_00469	0	1	0	284	0	0	0	1	0	1	0	0	1	1	0	0	0	0	0	0	0	0	0	0	0	2	0	0	0	1	0	0	135	0	0	0	0	0	0	0	0	0	0
Ascomycota	Eurotiomycetes				NM	ITS1_00470	0	0	0	0	0	0	0	0	0	0	0	0	0	0	3	0	0	0	0	0	0	0	0	0	0	0	0	0	0	0	0	0	0	0	0	142	17	0	0	0	0	0	0
Basidiomycota	Wallemiomycetes	Geminibasidiales	Geminibasidiaceae	Geminibasidium	NM	ITS1_00471	7	0	0	5	30	24	0	240	0	29	12	65	4	0	1	0	0	0	1	1	0	0	1	0	0	0	1	1	1	0	0	0	0	1	0	0	2	0	1	0	0	0	0
Basidiomycota	Agaricomycetes	Thelephorales	Thelephoraceae	Tomentella	EcM	ITS1_00472	0	0	0	52	0	0	0	0	0	0	1	0	0	0	0	0	31	208	1	0	0	0	1	3	0	40	32	45	0	0	0	0	3	0	0	0	0	0	0	0	0	0	0
Basidiomycota	Agaricomycetes	Sebacinales	Serendipitaceae		NM	ITS1_00473	0	0	0	0	0	0	0	0	0	0	0	0	0	0	0	0	0	0	0	0	0	0	0	0	0	0	0	0	163	0	0	0	0	0	0	0	0	0	0	0	0	0	0
Basidiomycota	Agaricomycetes	Russulales	Russulaceae	Russula	EcM	ITS1_00474	0	0	0	0	0	0	0	0	0	0	0	0	0	0	0	0	0	0	0	0	0	0	0	0	0	0	0	0	0	0	0	0	425	0	0	0	0	0	0	0	0	0	0
Basidiomycota	Agaricomycetes	Thelephorales	Thelephoraceae	Tomentella	EcM	ITS1_00475	0	0	0	1	0	0	0	1	0	0	0	273	0	0	1	1	0	0	0	0	0	0	0	0	0	0	0	0	0	0	0	0	1	1	0	0	1	0	0	0	142	0	0
Basidiomycota	Agaricomycetes	Thelephorales	Thelephoraceae	Tomentella	EcM	ITS1_00476	0	0	0	0	0	0	0	0	0	0	0	0	0	0	0	0	1	1	0	0	0	0	0	1	42	87	0	225	7	0	0	0	0	0	0	0	0	0	0	0	0	0	0
Basidiomycota	Agaricomycetes	Agaricales	Hydnangiaceae	Laccaria	EcM	ITS1_00477	0	0	0	0	0	0	0	0	0	0	0	0	0	0	0	0	0	0	0	0	0	0	8	0	0	0	0	110	0	0	0	1	0	0	0	0	0	0	0	0	0	0	0
Basidiomycota	Agaricomycetes	Thelephorales	Thelephoraceae		EcM	ITS1_00480	1	0	0	0	0	0	0	1	56	0	1	0	0	192	2	1	0	0	0	0	0	0	0	0	0	0	0	0	0	0	0	0	0	0	0	0	0	58	0	0	0	0	101
Basidiomycota	Agaricomycetes	Russulales	Russulaceae	Russula	EcM	ITS1_00481	1	0	0	2	1	0	1	0	0	0	0	407	0	2	0	1	0	0	0	0	0	0	0	0	0	0	0	0	0	0	0	0	0	0	0	0	0	0	0	0	0	0	0
Basidiomycota	Agaricomycetes	Russulales	Russulaceae	Russula	EcM	ITS1_00482	0	0	0	0	0	0	0	0	0	0	0	0	0	0	0	0	1	131	0	0	0	0	0	0	0	273	1	5	4	0	0	0	0	0	0	0	0	0	0	0	0	0	0
Basidiomycota	Agaricomycetes	Agaricales	Cortinariaceae	Cortinarius	EcM	ITS1_00483	0	0	0	0	0	0	0	0	0	0	0	0	0	0	0	0	1	1	0	212	97	0	1	0	0	0	0	1	0	0	0	0	0	0	0	0	0	0	0	0	0	0	0
Basidiomycota	Agaricomycetes	Agaricales	Marasmiaceae	Clitocybula	NM	ITS1_00484	0	0	0	0	0	0	0	0	0	0	0	0	0	0	28	0	0	0	0	0	0	0	0	0	0	0	0	0	0	0	0	0	2	1	0	0	0	4	1	0	0	0	1
Basidiomycota	Agaricomycetes	Agaricales			NM	ITS1_00486	0	271	115	2	0	1	0	1	1	0	0	2	0	0	0	0	0	5	0	0	1	0	0	1	0	6	0	0	0	0	1	1	0	0	0	0	0	0	0	0	0	0	0
Basidiomycota	Agaricomycetes	Agaricales			EcM	ITS1_00487	0	0	0	0	0	0	0	0	0	0	0	0	0	0	0	0	0	0	1	1	1	6	55	1	58	0	1	284	0	0	0	0	0	0	0	0	0	0	0	0	0	0	0
Basidiomycota	Agaricomycetes	Cantharellales	Clavulinaceae		EcM	ITS1_00489	0	0	0	0	0	0	0	0	0	0	0	0	0	0	1	0	1	1	0	0	0	0	0	0	0	1	0	0	178	0	0	0	0	0	0	0	0	0	0	0	0	0	0
Basidiomycota	Agaricomycetes	Russulales	Russulaceae	Lactarius	EcM	ITS1_00490	0	0	0	0	0	0	0	0	0	0	0	0	0	0	0	0	173	13	0	0	0	0	0	0	0	9	2	5	0	0	0	0	0	0	0	0	0	0	0	0	0	0	0
Basidiomycota	Agaricomycetes	Agaricales	Hygrophoraceae	Hygrocybe	NM	ITS1_00491	3	282	94	0	0	0	0	0	0	0	0	0	1	1	1	0	0	0	2	0	0	0	1	0	0	1	0	0	0	0	11	8	0	0	0	0	0	0	0	0	0	0	0
Ascomycota	Group0575				NM	ITS1_00492	0	0	0	1	0	0	43	1	193	0	0	0	0	0	12	1	0	0	0	0	0	0	0	13	0	89	0	1	2	0	0	0	0	0	0	5	0	38	0	0	0	0	0
Basidiomycota	Agaricomycetes	Russulales	Russulaceae		EcM	ITS1_00493	0	0	0	0	0	0	0	0	0	0	0	0	0	0	0	0	1	3	0	7	0	0	362	3	0	0	1	1	0	0	0	0	0	0	0	0	0	0	0	0	0	0	0
Ascomycota	Sordariomycetes	Xylariales			NM	ITS1_00494	4	0	0	1	76	54	0	0	0	0	0	2	1	0	0	0	0	0	0	0	0	0	1	0	0	0	0	1	1	21	0	1	0	209	27	0	1	0	0	0	0	0	0
Basidiomycota	Agaricomycetes	Russulales	Russulaceae	Russula	EcM	ITS1_00495	1	0	0	382	0	0	0	1	0	0	0	0	1	0	0	0	0	0	0	0	0	0	0	0	0	0	0	0	0	0	0	0	17	0	0	0	0	0	0	0	0	0	0
Ascomycota	Eurotiomycetes	Eurotiales	Trichocomaceae	Penicillium	NM	ITS1_00496	1	0	0	2	7	4	9	31	1	150	140	5	2	25	1	0	0	0	0	0	0	0	0	1	0	0	0	0	0	0	0	0	0	2	0	0	4	0	16	0	0	0	0
Basidiomycota	Agaricomycetes	Thelephorales	Thelephoraceae		EcM	ITS1_00497	0	0	0	0	0	0	0	0	0	0	0	0	0	0	0	0	0	2	0	0	0	2	306	1	8	0	0	10	0	0	0	0	0	0	0	0	0	0	0	0	0	0	0
Basidiomycota	Agaricomycetes	Agaricales	Hygrophoraceae	Hygrocybe	NM	ITS1_00498	1	1	0	1	0	0	0	394	0	0	1	1	0	0	0	1	0	0	0	0	0	0	0	0	0	0	0	0	0	0	0	0	0	0	0	0	1	0	0	0	0	0	0
Basidiomycota	Agaricomycetes	Agaricales	Inocybaceae	Inocybe	EcM	ITS1_00499	0	0	0	0	0	0	0	0	0	0	0	0	0	0	0	0	0	311	0	0	0	0	0	0	0	0	1	1	0	0	0	0	0	0	0	0	0	0	0	0	0	0	0
Mucoromycota	Mucoromycetes	Umbelopsidales	Umbelopsidaceae	Umbelopsis	NM	ITS1_00500	0	0	0	0	0	0	0	0	0	0	0	0	0	0	0	0	0	1	1	0	0	1	0	0	13	0	48	2	1	0	0	0	0	0	0	0	0	0	0	0	0	1	0
Ascomycota	Eurotiomycetes	Eurotiales			NM	ITS1_00502	3	1	0	1	17	1	0	0	0	0	1	0	0	1	0	1	0	1	0	0	0	1	0	0	1	0	0	1	0	81	0	0	0	263	19	0	1	0	1	0	0	0	0
Basidiomycota	Agaricomycetes	Boletales	Boletaceae	Boletus	EcM	ITS1_00504	0	0	0	0	106	40	0	4	0	0	0	55	1	0	0	0	1	0	0	0	0	0	0	1	0	0	0	0	0	0	0	0	0	99	44	0	7	0	0	4	28	7	0
Basidiomycota	Agaricomycetes	Agaricales	Mycenaceae	Mycena	NM	ITS1_00505	1	277	107	0	0	0	0	0	0	0	0	1	2	0	1	0	0	0	0	0	2	0	0	1	0	0	0	1	0	0	0	1	0	0	0	0	0	0	0	0	0	0	0
Basidiomycota	Agaricomycetes	Agaricales	Agaricaceae	Lycoperdon	NM	ITS1_00507	0	0	0	0	0	0	0	0	0	0	0	0	0	0	0	0	0	1	0	0	0	0	0	0	0	0	0	3	1	0	0	0	0	0	0	0	0	0	0	0	0	0	0
Basidiomycota	Agaricomycetes	Agaricales	Inocybaceae	Inocybe	EcM	ITS1_00508	2	21	14	155	0	0	0	1	0	0	0	0	1	0	0	1	0	0	0	0	0	0	0	0	0	0	0	0	0	0	13	2	173	0	0	0	0	8	0	0	0	1	1
Basidiomycota	Agaricomycetes	Russulales	Russulaceae		EcM	ITS1_00510	0	0	0	0	0	0	0	0	0	0	0	0	0	0	0	0	0	0	0	0	0	0	1	271	1	0	0	1	0	0	0	0	0	0	0	0	0	0	0	0	0	0	0
Basidiomycota	Agaricomycetes	Agaricales	Tricholomataceae	Tricholoma	NM	ITS1_00511	0	186	44	1	0	0	0	0	0	0	0	0	0	0	1	0	0	0	1	0	0	0	2	0	0	0	0	0	0	0	107	48	0	0	0	0	0	0	0	0	0	0	0
Basidiomycota	Agaricomycetes	Agaricales	Inocybaceae	Inocybe	EcM	ITS1_00512	0	0	0	0	0	0	0	0	0	0	0	0	0	0	0	0	0	0	0	374	0	0	0	0	0	0	0	0	0	0	0	0	0	0	0	0	0	0	0	0	0	0	0
Basidiomycota	Fungi_other				NM	ITS1_00513	0	0	0	0	0	0	0	0	0	0	0	0	0	0	1	364	0	0	0	0	0	0	0	0	0	0	0	0	0	0	0	0	0	0	0	0	0	0	0	0	0	0	0
Ascomycota	Eurotiomycetes	Eurotiales	Trichocomaceae	Eupenicillium	NM	ITS1_00514	0	0	0	0	0	1	0	0	0	0	0	0	0	0	0	0	69	0	0	0	0	4	0	0	145	48	68	0	3	0	0	0	0	0	0	0	0	0	0	0	0	0	0
Ascomycota	Eurotiomycetes	Eurotiales	Trichocomaceae	Penicillium	NM	ITS1_00515	1	0	0	0	3	0	48	2	33	142	101	1	0	0	0	0	1	0	0	0	0	0	0	0	0	0	0	0	0	0	0	0	0	0	0	15	0	0	17	21	0	0	0
Basidiomycota	Agaricomycetes	Thelephorales	Thelephoraceae		EcM	ITS1_00516	0	0	0	102	0	0	0	0	0	0	0	0	0	1	0	0	0	0	0	0	0	0	0	0	0	0	0	0	0	0	0	0	282	0	0	0	0	0	0	0	0	0	0
Basidiomycota	Agaricomycetes	Sebacinales	Serendipitaceae		NM	ITS1_00517	0	0	0	0	0	0	0	0	0	0	0	0	0	0	0	0	0	0	0	0	0	0	0	0	0	0	0	1	317	0	0	0	0	0	0	0	0	0	0	0	0	0	0
Basidiomycota	Agaricomycetes	Cantharellales	Clavulinaceae	Clavulina	EcM	ITS1_00518	0	0	0	0	0	0	0	0	0	0	0	0	0	0	0	0	4	193	0	0	0	0	0	0	0	20	1	164	0	0	0	0	0	0	0	0	0	0	0	0	0	0	0
Basidiomycota	Agaricomycetes	Cantharellales	Cantharellaceae		EcM	ITS1_00519	0	0	0	0	0	0	0	0	0	0	0	0	0	0	0	0	0	1	0	0	0	0	4	8	0	0	21	143	0	0	0	0	0	0	0	0	0	0	0	0	0	0	0
Ascomycota	Fungi_other				NM	ITS1_00520	1	0	0	2	2	0	0	341	0	1	0	0	0	0	0	0	0	0	0	0	0	0	0	0	0	0	0	0	0	0	0	0	0	0	0	0	30	0	1	0	0	0	0
Basidiomycota	Agaricomycetes	Thelephorales	Thelephoraceae	Tomentella	EcM	ITS1_00522	0	0	0	0	1	0	0	0	0	6	9	234	1	1	2	0	0	0	0	0	0	0	0	0	0	0	0	0	0	0	0	0	0	0	0	1	0	0	5	8	102	3	1
Basidiomycota	Agaricomycetes	Agaricales	Cortinariaceae	Cortinarius	EcM	ITS1_00524	0	0	0	0	0	0	0	0	0	0	0	0	0	0	0	0	0	1	2	20	210	0	0	0	0	0	0	1	0	0	0	1	0	0	0	0	0	0	0	0	0	0	0
Basidiomycota	Agaricomycetes	Agaricales	Cortinariaceae	Cortinarius	EcM	ITS1_00525	368	0	0	1	1	0	0	1	0	0	0	0	0	0	1	0	0	0	0	0	0	0	0	0	0	0	0	0	0	1	0	0	0	0	0	0	0	0	0	0	0	0	0
Basidiomycota	Agaricomycetes	Russulales	Russulaceae	Lactarius	EcM	ITS1_00526	0	0	0	0	0	0	0	0	0	0	0	0	0	0	0	0	19	174	1	0	0	0	1	0	0	33	2	0	2	0	0	0	0	0	0	0	0	0	0	0	0	0	0
Basidiomycota	Agaricomycetes	Agaricales	Cortinariaceae	Cortinarius	EcM	ITS1_00527	0	0	0	0	0	0	0	0	0	0	0	0	0	0	0	0	0	0	0	308	0	0	0	0	0	0	0	0	0	0	0	0	0	0	0	0	0	0	0	0	0	0	0
Ascomycota	Eurotiomycetes	Chaetothyriales	Herpotrichiellaceae	Cladophialophora	NM	ITS1_00528	3	1	0	8	0	0	0	0	0	0	0	0	45	0	0	39	5	4	1	0	0	7	31	33	12	9	15	39	1	0	7	1	1	0	0	0	0	0	0	0	0	23	0
Basal lineages7	Fungi_other				NM	ITS1_00529	0	0	0	0	0	0	0	0	0	0	0	0	0	0	0	0	0	0	0	0	0	0	0	0	0	0	0	0	0	0	0	0	84	4	0	0	9	0	4	87	158	10	0
Basidiomycota	Agaricomycetes	Thelephorales	Thelephoraceae	Tomentella	EcM	ITS1_00530	0	0	0	53	0	0	0	0	0	0	0	0	0	0	1	0	0	2	0	0	0	0	0	0	5	246	0	7	1	0	0	0	22	0	0	0	0	0	0	0	0	0	0
Basidiomycota	Agaricomycetes	Trechisporales			NM	ITS1_00531	0	0	0	0	0	0	0	0	286	0	0	0	0	28	0	0	0	0	0	0	0	0	0	5	0	0	0	0	0	0	0	0	0	0	0	0	0	46	0	0	0	0	4
Basidiomycota	Agaricomycetes	Russulales	Russulaceae		EcM	ITS1_00533	0	0	0	0	0	0	0	0	0	0	0	0	0	0	0	0	0	0	0	42	33	0	0	0	0	0	0	0	0	0	0	0	0	0	1	0	0	0	0	0	0	0	0
Basidiomycota	Agaricomycetes	Agaricales	Inocybaceae	Inocybe	EcM	ITS1_00534	0	0	0	0	0	0	0	0	0	0	0	0	0	0	0	0	0	0	0	0	0	0	0	0	0	0	0	0	0	0	0	0	1	0	0	0	365	0	0	0	0	0	0
Basidiomycota	Agaricomycetes	Russulales	Russulaceae	Russula	EcM	ITS1_00535	2	0	0	2	205	131	0	0	0	0	0	0	0	1	0	1	1	2	0	0	1	0	3	1	6	1	1	1	1	0	0	0	0	4	1	0	0	0	0	0	0	0	0
Mucoromycota	Mucoromycetes				NM	ITS1_00536	0	1	0	0	0	0	0	0	1	12	136	172	15	1	0	0	0	0	0	0	0	0	0	0	0	0	0	0	0	0	0	0	0	0	0	0	0	0	3	11	11	1	0
Basidiomycota	Agaricomycetes	Agaricales	Inocybaceae	Inocybe	EcM	ITS1_00537	0	0	0	0	2	0	1	0	0	0	1	281	0	0	1	4	0	0	0	0	0	0	0	0	0	0	0	0	0	0	0	0	0	0	0	0	0	0	0	0	74	0	1
Basidiomycota	Agaricomycetes	Russulales	Russulaceae	Russula	EcM	ITS1_00538	0	0	0	0	0	1	0	0	0	0	0	0	0	0	0	0	0	1	1	0	0	0	3	259	2	0	0	0	1	0	0	0	0	0	0	0	0	0	0	0	0	0	0
Basidiomycota	Agaricomycetes	Agaricales	Marasmiaceae		NM	ITS1_00539	0	0	0	0	1	0	0	0	0	0	0	0	0	0	361	3	0	0	0	0	0	0	0	0	0	0	0	0	0	0	0	0	0	0	0	0	0	0	0	0	0	0	0
Basidiomycota	Agaricomycetes	Thelephorales	Thelephoraceae		EcM	ITS1_00542	0	0	0	289	1	0	0	0	0	1	0	0	1	0	1	1	0	12	0	0	0	0	0	0	0	0	0	3	0	0	0	0	48	0	0	0	0	0	0	0	0	0	0
Basidiomycota	Agaricomycetes	Agaricales	Inocybaceae	Inocybe	EcM	ITS1_00543	0	0	0	0	0	0	0	0	0	0	0	0	0	0	0	0	0	0	0	0	0	0	0	0	0	0	0	0	0	0	0	0	1	0	0	357	1	0	0	0	0	1	0
Basidiomycota	Agaricomycetes	Agaricales	Hygrophoraceae	Hygrocybe	NM	ITS1_00544	1	1	0	1	0	0	0	285	1	0	1	1	0	0	0	0	0	0	0	0	0	0	0	0	0	0	0	0	0	0	0	0	0	0	0	1	70	0	0	0	0	0	0
Basidiomycota	Agaricomycetes	Cantharellales	Clavulinaceae		EcM	ITS1_00545	0	0	0	0	0	0	0	0	0	0	9	308	0	0	1	0	0	0	0	0	0	0	0	0	0	0	0	0	0	0	0	0	0	0	0	0	0	0	0	1	42	0	0
Basidiomycota	Agaricomycetes	Sebacinales	Serendipitaceae		NM	ITS1_00547	0	0	0	0	0	0	0	0	0	0	0	0	0	0	0	0	0	0	265	0	0	20	69	0	0	0	3	0	0	0	0	0	0	0	0	0	0	0	0	0	0	0	0
Basidiomycota	Agaricomycetes	Agaricales	Hydnangiaceae	Laccaria	EcM	ITS1_00548	0	0	0	0	0	0	0	0	0	0	0	0	0	0	0	0	0	0	0	0	0	0	0	0	0	0	0	0	0	0	0	0	0	0	0	0	0	0	0	0	0	0	0
Basidiomycota	Agaricomycetes	Agaricales	Strophariaceae	Psilocybe	NM	ITS1_00551	0	0	0	0	0	0	0	0	0	0	0	0	0	0	0	0	0	0	0	0	0	0	0	0	0	0	0	0	0	0	0	1	0	286	67	0	0	0	0	0	0	0	0
Ascomycota	Eurotiomycetes				NM	ITS1_00553	0	0	0	0	0	0	1	0	0	28	2	0	0	0	0	0	4	0	0	0	0	0	0	0	7	0	0	0	0	0	1	0	0	0	0	1	4	0	243	1	0	0	1
Kickxellomycota	Kickxellomycetes	Kickxellales	Kickxellaceae	Ramicandelaber	NM	ITS1_00555	14	21	9	88	0	0	0	0	0	0	0	0	0	0	0	0	0	0	0	0	0	0	0	0	0	0	0	0	0	31	24	8	162	0	0	0	0	0	0	0	0	0	0
Basidiomycota	Agaricomycetes	Thelephorales	Thelephoraceae		EcM	ITS1_00556	0	0	0	0	0	0	0	0	0	0	0	0	0	0	0	0	0	1	0	0	0	0	0	0	1	0	0	1	244	0	0	0	0	0	0	0	0	0	0	0	0	0	0
Ascomycota	Eurotiomycetes	Eurotiales	Trichocomaceae	Talaromyces	NM	ITS1_00557	2	2	0	2	1	0	13	23	299	1	0	0	0	0	0	1	0	0	0	0	0	0	0	0	0	0	0	0	0	0	0	0	0	1	0	2	3	6	0	0	0	0	0
Basidiomycota	Agaricomycetes	Thelephorales	Thelephoraceae		EcM	ITS1_00558	0	1	0	0	0	0	17	0	0	0	0	0	0	286	1	1	0	0	0	0	0	0	0	0	0	0	0	0	0	0	0	0	0	1	0	6	0	0	0	0	0	0	42
Basidiomycota	Agaricomycetes	Polyporales	Ganodermataceae	Ganoderma	NM	ITS1_00559	2	1	0	2	2	3	6	1	0	0	0	3	4	11	0	16	26	8	31	32	2	10	3	15	31	57	37	4	2	3	0	0	0	1	0	0	1	0	0	0	0	1	0
Basidiomycota	Agaricomycetes	Russulales	Russulaceae	Gymnomyces	EcM	ITS1_00560	1	0	0	0	0	0	0	0	271	0	2	0	1	0	0	0	0	0	0	0	0	0	0	0	0	0	0	0	0	0	0	0	0	0	0	0	0	76	0	0	0	0	0
Basidiomycota	Agaricomycetes	Agaricales	Cortinariaceae	Cortinarius	EcM	ITS1_00562	0	0	0	0	0	0	0	0	0	0	0	0	0	0	0	0	0	0	1	0	1	0	1	0	0	0	7	121	1	0	0	0	0	0	0	0	0	0	0	0	0	0	0
Basidiomycota	Agaricomycetes	Agaricales	Mycenaceae	Mycena	NM	ITS1_00563	0	0	0	1	0	0	17	0	0	0	0	0	1	1	122	0	0	0	0	0	0	0	0	1	0	0	0	0	0	0	0	0	1	0	0	47	0	0	0	0	0	0	0
Ascomycota	Eurotiomycetes	Chaetothyriales	Herpotrichiellaceae	Cladophialophora	NM	ITS1_00564	212	0	1	0	1	0	0	0	8	3	0	1	1	0	1	2	0	0	0	0	0	0	0	0	0	0	0	0	0	112	0	0	1	1	0	0	0	5	0	0	0	0	0
Basidiomycota	Agaricomycetes	Agaricales	Cortinariaceae	Cortinarius	EcM	ITS1_00566	0	0	0	0	0	1	0	0	0	0	0	0	0	0	0	0	0	1	0	63	253	1	1	1	0	0	0	2	0	0	0	0	0	0	0	0	0	0	0	0	0	0	0
Basidiomycota	Agaricomycetes	Agaricales	Cortinariaceae	Cortinarius	EcM	ITS1_00567	0	0	0	0	0	0	0	0	0	0	0	0	0	0	0	0	0	0	0	4	15	0	0	0	0	0	0	0	0	0	0	0	0	0	0	0	0	0	0	0	0	0	0
Basidiomycota	Agaricomycetes	Boletales	Sclerodermataceae	Scleroderma	EcM	ITS1_00568	0	0	0	0	0	0	1	1	0	0	0	0	2	88	1	0	0	0	0	0	0	0	0	0	0	0	0	0	0	0	0	0	0	0	0	16	1	2	0	0	0	0	236
Basidiomycota	Agaricomycetes	Agaricales	Psathyrellaceae	Coprinopsis	NM	ITS1_00569	0	0	0	1	1	0	0	0	0	0	0	0	0	43	143	0	0	0	0	0	0	0	0	0	0	0	0	0	0	0	0	0	0	0	0	0	0	0	0	0	0	0	41
Ascomycota	Sordariomycetes	Hypocreales	Hypocreaceae	Trichoderma	NM	ITS1_00570	7	0	0	0	1	1	16	0	6	3	8	2	25	1	2	1	158	12	0	1	7	4	1	4	2	14	63	8	0	0	0	0	0	0	0	0	0	0	0	0	0	0	0
Basidiomycota	Agaricomycetes	Thelephorales	Thelephoraceae		EcM	ITS1_00571	0	0	0	0	0	0	0	0	0	0	0	119	0	93	2	0	0	0	0	0	0	0	0	0	0	0	0	0	0	0	0	0	2	0	0	1	0	0	3	0	60	0	65
Basidiomycota	Agaricomycetes	Russulales	Russulaceae	Russula	EcM	ITS1_00572	0	0	0	1	0	0	0	0	0	32	14	30	9	0	0	0	0	0	0	0	0	0	0	0	0	0	0	0	0	0	0	0	0	0	0	0	0	0	71	48	113	27	0
Ascomycota	Leotiomycetes	Helotiales			NM	ITS1_00573	0	0	0	0	0	0	0	0	0	0	0	0	0	0	0	0	1	261	1	0	0	1	0	0	0	1	0	0	0	0	0	0	0	0	0	0	0	0	0	0	0	0	0
Ascomycota	Sordariomycetes	Sordariales	Sordariaceae	Gelasinospora	NM	ITS1_00575	0	0	0	1	150	91	1	70	2	0	0	0	2	19	0	2	0	0	4	0	0	0	1	2	0	0	0	0	0	0	0	0	0	0	0	0	0	0	0	0	0	0	0
Basidiomycota	Agaricomycetes	Thelephorales	Thelephoraceae		EcM	ITS1_00577	0	0	0	0	0	0	0	0	0	0	0	0	0	0	0	0	0	312	0	0	0	2	1	0	0	0	0	1	1	0	0	0	0	0	0	0	0	0	0	0	0	0	0
Basidiomycota	Agaricomycetes	Russulales	Russulaceae	Russula	EcM	ITS1_00578	1	0	0	1	0	0	0	0	47	1	0	1	0	286	2	1	0	0	0	0	0	0	0	0	0	0	0	0	0	0	0	0	0	0	0	0	0	0	0	0	0	0	1
Basal lineages7	Fungi_other				NM	ITS1_00579	0	1	0	0	4	1	0	114	0	20	144	38	7	0	0	0	0	1	0	0	0	0	0	0	0	0	0	0	0	0	0	0	0	0	0	0	5	0	0	4	2	0	0
Basidiomycota	Agaricomycetes	Agaricales	Cortinariaceae	Cortinarius	EcM	ITS1_00580	0	0	0	0	0	0	0	0	0	0	0	0	0	0	0	0	0	0	1	0	0	0	205	0	0	0	0	0	0	0	0	0	0	0	0	0	0	0	0	0	0	0	0
Ascomycota	Leotiomycetes				NM	ITS1_00581	0	0	0	0	0	0	0	0	0	0	0	0	0	0	0	0	0	0	0	18	1	0	0	0	0	0	110	2	1	0	0	0	0	0	0	0	0	0	0	0	0	0	0
Basidiomycota	Agaricomycetes	Atheliales	Atheliaceae		EcM	ITS1_00582	0	0	0	0	0	0	0	0	0	0	0	0	0	0	0	0	0	2	0	0	0	0	0	0	0	0	0	332	1	0	0	0	0	0	0	0	0	0	0	0	0	0	0
Basidiomycota	Agaricomycetes	Russulales	Russulaceae	Russula	EcM	ITS1_00584	0	0	0	0	0	0	0	0	0	0	0	0	0	0	0	0	0	0	0	0	0	0	0	0	0	0	0	0	0	0	0	0	0	0	0	0	0	0	75	147	63	52	0
Basidiomycota	Agaricomycetes	Agaricales	Inocybaceae	Inocybe	EcM	ITS1_00586	0	0	0	1	0	0	0	146	0	1	0	1	1	0	0	0	0	0	0	0	0	0	0	0	0	0	0	0	0	0	0	0	0	1	0	0	183	0	0	0	0	0	0
Basidiomycota	Agaricomycetes	Sebacinales	Sebacinaceae	Sebacina	EcM	ITS1_00587	0	1	0	0	174	126	0	6	0	0	3	1	0	20	1	0	0	0	2	0	0	0	1	1	0	0	0	0	0	0	0	0	0	0	0	0	0	0	0	0	0	0	0
Ascomycota	Pezizomycetes	Pezizales	Sarcosomataceae		NM	ITS1_00588	0	0	0	0	177	111	1	0	0	0	0	1	0	0	0	0	0	0	0	0	1	1	1	0	1	0	1	0	0	0	0	0	0	33	4	0	0	0	0	0	0	0	0
Ascomycota	Sordariomycetes	Hypocreales	Hypocreaceae	Trichoderma	NM	ITS1_00589	4	1	0	3	24	17	3	1	125	17	8	3	1	0	8	1	30	0	0	0	0	12	1	0	38	6	23	6	0	0	0	0	0	0	0	0	0	0	0	0	0	0	0
Ascomycota	Fungi_other				NM	ITS1_00590	0	0	0	0	0	0	0	0	0	0	0	0	0	0	0	0	1	0	0	0	0	0	0	0	0	0	1	280	0	0	0	0	0	0	0	0	0	0	0	0	0	0	0
Basidiomycota	Agaricomycetes	Agaricales	Inocybaceae	Inocybe	EcM	ITS1_00591	1	0	0	0	0	0	0	72	0	0	0	0	0	0	0	0	0	0	0	0	0	0	0	0	0	0	0	0	0	0	0	0	0	1	0	0	256	0	0	0	0	0	0
Basidiomycota	Agaricomycetes	Russulales	Russulaceae	Lactarius	EcM	ITS1_00592	1	0	0	2	96	47	0	6	0	0	0	1	0	0	0	0	0	1	0	0	0	0	0	0	0	0	0	0	0	2	0	0	3	128	38	0	3	0	0	0	0	1	0
Mucoromycota	Mucoromycetes	Mucorales	Cunninghamellaceae	Gongronella	NM	ITS1_00593	0	0	0	0	0	0	0	0	0	0	0	0	0	0	0	0	0	0	0	0	0	0	0	0	0	0	0	0	0	4	0	0	0	1	1	42	0	274	0	0	0	0	0
Basidiomycota	Agaricomycetes	Cantharellales	Clavulinaceae		EcM	ITS1_00594	0	0	0	0	0	0	0	0	0	0	0	0	0	0	0	0	3	12	0	0	0	59	231	1	7	0	1	1	0	0	0	0	0	0	0	0	0	0	0	0	0	0	0
Basidiomycota	Agaricomycetes	Sebacinales			NM	ITS1_00595	0	0	0	0	0	0	0	0	0	0	0	0	0	0	0	0	0	0	0	0	0	0	326	0	2	0	0	0	0	0	0	0	0	0	0	0	0	0	0	0	0	0	0
Basidiomycota	Agaricomycetes	Thelephorales	Thelephoraceae	Tomentella	EcM	ITS1_00596	0	0	0	2	1	0	0	128	0	0	0	0	0	0	0	0	0	0	0	0	0	0	0	0	0	0	0	0	0	0	0	0	0	5	1	0	187	0	0	0	0	0	0
Basidiomycota	Agaricomycetes	Russulales	Russulaceae	Russula	EcM	ITS1_00597	1	0	0	193	0	0	0	0	0	0	0	0	0	0	0	0	0	0	0	0	0	0	0	0	0	0	0	0	0	0	0	0	132	0	0	0	0	0	0	0	0	0	0
Basidiomycota	Agaricomycetes	Thelephorales	Thelephoraceae	Tomentella	EcM	ITS1_00598	0	1	0	0	0	0	0	0	0	63	23	111	12	0	1	2	0	0	0	0	0	0	0	0	0	0	0	0	0	0	0	0	2	0	0	0	2	0	28	18	53	4	0
Basidiomycota	Agaricomycetes	Agaricales	Inocybaceae		EcM	ITS1_00600	1	0	0	0	0	0	0	0	183	0	0	0	0	0	0	0	0	0	0	0	0	0	0	0	0	0	0	0	0	0	0	0	0	0	0	0	0	142	0	0	0	0	0
Basidiomycota	Agaricomycetes	Agaricales	Marasmiaceae		NM	ITS1_00601	0	0	0	0	0	0	0	1	0	0	0	0	0	0	148	0	0	0	0	0	0	0	0	0	0	0	0	0	0	0	0	0	1	0	0	1	0	0	0	0	0	0	0
Basidiomycota	Agaricomycetes	Agaricales			NM	ITS1_00603	0	1	0	1	0	0	157	1	0	0	2	0	0	0	0	3	0	0	0	0	0	0	0	0	0	0	0	0	0	0	0	0	1	0	0	157	0	0	0	0	0	0	0
Basidiomycota	Agaricomycetes	Trechisporales	Hydnodontaceae	Trechispora	NM	ITS1_00604	0	0	0	0	0	0	0	0	0	0	0	0	0	0	0	6	0	0	0	1	191	0	0	1	0	0	0	0	0	0	0	0	0	0	0	0	0	0	0	0	0	0	0
Basidiomycota	Agaricomycetes	Atheliales	Atheliaceae		EcM	ITS1_00605	0	0	0	0	0	0	0	0	0	0	0	0	0	0	0	0	0	0	0	0	0	0	94	0	0	0	77	145	0	0	0	0	0	0	0	0	0	0	0	0	0	0	0
Basidiomycota	Agaricomycetes	Trechisporales			NM	ITS1_00606	0	0	0	0	0	0	0	0	0	0	0	0	0	0	1	211	2	18	0	13	17	0	0	0	0	0	0	0	0	0	0	0	0	1	0	0	0	0	0	0	0	1	0
Basidiomycota	Agaricomycetes	Thelephorales	Thelephoraceae	Tomentella	EcM	ITS1_00607	0	0	0	2	173	112	0	23	0	0	0	0	0	0	0	0	0	1	1	0	0	1	1	0	1	1	0	0	0	0	0	0	0	1	1	0	2	0	0	0	0	0	0
Ascomycota	Fungi_other				NM	ITS1_00608	1	195	81	5	0	0	1	0	0	2	8	8	0	0	1	0	0	1	0	0	1	0	0	0	0	0	0	0	0	0	12	2	0	0	0	0	0	0	0	0	0	0	0
Mucoromycota	Mucoromycetes	Umbelopsidales	Umbelopsidaceae	Umbelopsis	NM	ITS1_00609	0	0	0	0	0	0	0	0	0	0	0	0	0	0	0	0	0	0	0	0	0	0	1	0	0	0	0	0	0	0	0	0	0	0	0	0	0	0	0	0	0	2	0
Basidiomycota	Agaricomycetes	Russulales	Russulaceae		EcM	ITS1_00610	0	0	0	0	0	0	0	0	0	0	0	0	0	0	0	0	39	1	0	0	0	0	0	0	0	1	187	3	5	0	0	0	0	0	0	0	0	0	0	0	0	0	0
Basidiomycota	Agaricomycetes	Russulales	Russulaceae		EcM	ITS1_00611	0	0	0	0	0	0	0	0	0	0	0	0	0	0	0	0	0	0	0	0	0	0	0	0	0	0	0	0	0	0	0	0	0	0	0	0	0	0	0	0	0	0	0
Basidiomycota	Agaricomycetes	Atheliales			EcM	ITS1_00612	0	0	0	0	0	0	0	0	0	0	0	0	0	0	0	0	1	1	0	1	1	0	0	246	0	0	0	0	0	0	0	0	0	0	0	0	0	0	0	0	0	0	0
Basidiomycota	Agaricomycetes	Russulales	Russulaceae	Russula	EcM	ITS1_00613	0	0	0	222	0	0	0	0	0	0	0	0	2	0	0	0	0	0	0	0	0	0	0	0	0	0	0	0	0	0	0	0	87	0	0	0	0	0	0	0	0	1	0
Basidiomycota	Agaricomycetes	Boletales	Sclerodermataceae	Scleroderma	EcM	ITS1_00615	0	82	63	0	0	0	0	1	0	0	0	0	0	0	0	0	0	0	0	0	0	0	0	0	0	0	0	0	0	0	136	33	0	0	0	0	0	0	0	0	0	0	0
Basidiomycota	Agaricomycetes	Thelephorales	Thelephoraceae	Tomentella	EcM	ITS1_00616	0	0	0	0	0	0	0	0	0	0	0	0	0	1	0	0	0	0	0	1	0	0	0	0	0	0	0	311	1	0	0	0	0	0	0	0	0	0	0	0	0	0	0
Ascomycota	Sordariomycetes	Hypocreales	Hypocreaceae	Trichoderma	NM	ITS1_00617	1	0	0	4	3	1	0	9	14	5	0	2	2	1	5	1	84	0	1	1	0	65	2	0	62	17	28	7	0	0	0	0	0	0	0	0	0	0	0	0	0	0	0
Basidiomycota	Agaricomycetes	Russulales	Russulaceae	Russula	EcM	ITS1_00619	0	0	0	27	0	0	0	0	0	0	0	0	1	0	0	0	1	49	0	0	0	0	0	1	0	222	2	8	3	0	0	0	0	0	0	0	0	0	0	0	0	0	0
Basidiomycota	Agaricomycetes	Polyporales	Ganodermataceae	Ganoderma	NM	ITS1_00620	2	0	0	0	0	0	0	0	0	0	0	2	0	242	0	0	0	0	0	0	0	0	0	0	0	0	0	0	0	0	1	0	0	0	0	0	0	0	0	0	0	0	64
Ascomycota	Eurotiomycetes	Chaetothyriales	Herpotrichiellaceae	Exophiala	NM	ITS1_00621	0	0	0	0	0	0	0	0	0	0	0	0	0	0	1	11	85	9	18	0	0	16	0	0	7	20	40	8	0	0	0	0	0	0	0	0	0	0	0	0	0	17	0
Ascomycota	Sordariomycetes	Hypocreales	Clavicipitaceae		NM	ITS1_00622	1	0	0	0	0	0	0	0	0	0	0	0	43	0	0	0	234	2	0	6	2	0	0	0	0	16	2	4	0	0	0	0	0	0	0	0	0	0	0	0	0	0	0
Basidiomycota	Agaricomycetes	Boletales	Sclerodermataceae		EcM	ITS1_00623	0	0	0	0	0	1	0	0	0	0	0	0	0	0	0	0	1	1	1	0	0	5	0	121	21	62	0	0	1	0	0	0	0	0	0	0	0	0	0	0	0	0	0
Chytridiomycota	Chytridiomycetes	Spizellomycetales	Spizellomycetaceae	Spizellomyces	NM	ITS1_00624	1	0	0	0	17	3	0	36	0	0	0	0	0	74	1	0	0	0	0	1	0	0	0	0	0	0	0	0	0	0	0	0	0	13	3	0	38	0	0	0	0	0	120
Basidiomycota	Agaricomycetes	Thelephorales	Thelephoraceae		EcM	ITS1_00625	0	0	0	0	0	0	0	0	0	0	0	0	0	0	0	0	0	0	0	0	0	0	237	3	20	0	0	7	0	0	0	0	0	0	0	0	0	0	0	0	0	0	0
Basidiomycota	Agaricomycetes	Thelephorales	Thelephoraceae		EcM	ITS1_00626	0	0	0	0	0	0	0	0	0	0	0	0	0	0	0	0	0	0	0	0	0	0	0	0	0	0	0	0	0	0	0	0	0	0	0	0	0	2	0	0	0	0	0
Basidiomycota	Agaricomycetes	Agaricales	Inocybaceae	Inocybe	EcM	ITS1_00627	0	0	0	0	0	0	0	1	0	0	0	0	1	129	10	1	0	0	0	0	0	0	0	0	0	0	0	0	0	0	0	0	1	0	0	2	0	0	0	0	0	0	152
Basidiomycota	Agaricomycetes	Agaricales	Pterulaceae	Pterula	NM	ITS1_00628	1	0	0	0	62	64	0	1	0	0	0	0	0	1	1	0	0	1	2	0	1	0	2	1	1	0	0	0	0	0	0	1	0	125	38	0	0	0	0	0	0	0	0
Basidiomycota	Wallemiomycetes	Geminibasidiales	Geminibasidiaceae	Geminibasidium	NM	ITS1_00629	1	0	0	0	0	0	0	0	0	69	30	201	3	0	0	1	0	0	0	0	0	0	0	0	0	0	0	0	0	0	0	0	0	0	0	0	0	0	0	0	0	0	0
Basidiomycota	Agaricomycetes	Cantharellales	Cantharellaceae	Pseudocraterellus	EcM	ITS1_00630	0	0	0	0	0	0	0	0	0	0	0	0	0	0	0	0	0	158	0	0	0	0	0	0	1	1	0	0	0	0	0	0	0	0	0	0	0	0	0	0	0	0	0
Mucoromycota	Mucoromycetes	Mucorales	Backusellaceae	Backusella	NM	ITS1_00631	0	0	0	0	0	0	0	0	0	0	0	0	0	0	0	0	0	0	0	0	0	0	0	0	0	0	0	0	0	0	0	0	0	0	0	0	0	301	0	0	3	0	0
Basidiomycota	Agaricomycetes	Agaricales	Marasmiaceae	Clitocybula	NM	ITS1_00632	0	0	0	0	0	0	0	0	0	0	1	0	1	0	265	1	0	0	0	0	0	0	0	0	0	0	0	0	0	0	0	0	0	0	0	0	0	0	0	0	0	0	0
Basidiomycota	Agaricomycetes	Agaricales	Amanitaceae	Amanita	EcM	ITS1_00633	0	0	0	0	0	0	0	0	0	0	0	0	0	1	0	0	0	0	1	0	0	0	0	1	0	0	0	256	1	0	0	0	0	0	0	0	0	0	0	0	0	0	0
Ascomycota	Eurotiomycetes	Eurotiales	Trichocomaceae	Penicillium	NM	ITS1_00634	0	0	0	0	0	0	0	0	0	0	0	0	0	0	0	0	1	0	0	0	0	0	0	0	0	0	0	0	0	0	0	0	0	0	0	0	0	0	0	0	0	0	0
Basidiomycota	Agaricomycetes	Russulales	Russulaceae	Lactarius	EcM	ITS1_00635	0	0	0	0	0	0	0	1	99	0	1	0	0	0	0	0	0	0	0	0	0	0	0	0	0	0	0	0	0	0	0	0	1	0	0	0	0	200	0	0	0	0	0
Basidiomycota	Agaricomycetes	Russulales	Russulaceae	Russula	EcM	ITS1_00637	0	0	0	267	0	0	0	0	0	0	0	0	1	0	0	0	0	1	0	0	0	0	1	0	23	2	1	0	0	0	0	0	1	0	0	0	0	0	0	0	0	0	0
Ascomycota	Pezizomycetes	Pezizales	Pezizaceae	Ruhlandiella	EcM	ITS1_00638	0	0	0	0	0	0	0	0	0	0	0	0	0	0	0	0	7	147	0	17	23	0	0	0	0	11	4	72	1	0	0	0	0	0	0	0	0	0	0	0	0	0	0
Ascomycota	Sordariomycetes	Hypocreales	Hypocreaceae	Hypocrea	NM	ITS1_00639	1	2	2	20	2	1	9	4	57	35	8	16	8	2	19	0	12	0	2	0	0	7	2	3	15	45	28	2	0	0	0	0	0	0	0	0	0	0	0	0	0	0	0
Basidiomycota	Agaricomycetes	Thelephorales	Thelephoraceae		EcM	ITS1_00640	0	0	0	0	0	0	0	0	0	0	0	1	256	0	0	0	0	0	0	0	0	0	0	0	0	0	0	0	0	0	0	0	1	0	0	0	0	0	0	0	0	41	0
Basidiomycota	Agaricomycetes	Cantharellales	Cantharellaceae		EcM	ITS1_00641	0	0	0	0	0	0	0	0	0	0	0	0	0	0	0	0	0	1	0	60	86	0	1	0	0	0	0	1	0	0	0	0	0	0	0	0	0	0	0	0	0	0	0
Basidiomycota	Agaricomycetes	Agaricales	Cortinariaceae	Cortinarius	EcM	ITS1_00642	0	0	0	0	0	0	0	0	0	0	0	0	0	0	0	0	1	124	1	0	0	0	3	1	0	20	1	2	1	0	0	0	0	0	0	0	0	0	0	0	0	0	0
Basidiomycota	Agaricomycetes	Agaricales	Tricholomataceae	Tricholoma	EcM	ITS1_00643	0	0	0	0	0	0	0	0	0	0	0	0	0	0	0	0	0	192	0	0	0	0	1	0	0	4	0	1	0	0	0	0	0	0	0	0	0	0	0	0	0	0	0
Basidiomycota	Agaricomycetes	Russulales	Russulaceae	Russula	EcM	ITS1_00644	0	0	0	0	0	0	0	0	0	0	0	0	166	0	1	0	0	0	0	0	0	0	0	0	0	0	0	0	0	0	0	0	3	1	0	0	0	0	1	1	0	126	0
Basidiomycota	Agaricomycetes	Russulales	Russulaceae	Russula	EcM	ITS1_00645	0	2	0	228	0	0	0	0	0	0	0	0	0	0	0	1	0	0	0	0	0	0	0	0	0	0	0	0	0	0	0	0	68	0	0	0	0	0	0	0	0	0	0
Basidiomycota	Agaricomycetes	Thelephorales	Thelephoraceae	Tomentella	EcM	ITS1_00646	0	0	0	1	0	0	34	0	43	0	0	0	1	0	140	0	0	0	0	0	0	0	0	0	0	0	0	0	0	0	0	0	0	0	0	5	0	27	0	0	0	0	0
Basidiomycota	Agaricomycetes	Cantharellales	Ceratobasidiaceae	Rhizoctonia	NM	ITS1_00647	1	1	0	1	2	0	4	0	0	0	0	0	0	178	78	1	0	0	0	0	0	0	1	5	4	0	0	0	0	0	0	0	0	0	0	1	0	0	0	0	0	0	15
Mortierellomycota	Mortierellomycetes	Mortierellales			NM	ITS1_00648	0	68	25	45	0	0	0	0	6	0	0	1	0	0	0	1	1	33	0	2	0	0	0	0	1	14	4	14	0	0	18	18	35	0	0	1	0	4	0	0	0	0	0
Basidiomycota	Agaricomycetes	Sebacinales			NM	ITS1_00650	0	0	0	0	0	0	0	0	0	0	0	0	0	0	0	0	0	0	250	0	0	0	2	0	0	0	0	0	0	0	0	0	0	0	0	0	0	0	0	0	0	0	0
Basidiomycota	Agaricomycetes	Agaricales	Inocybaceae	Inocybe	EcM	ITS1_00651	0	0	0	0	0	0	0	0	0	0	0	0	0	0	0	0	0	294	0	0	0	0	2	0	0	1	0	0	0	0	0	0	0	0	0	0	0	0	0	0	0	0	0
Basidiomycota	Agaricomycetes	Cantharellales	Cantharellaceae	Craterellus	EcM	ITS1_00652	0	0	0	0	0	0	0	0	0	0	0	0	0	0	0	0	0	0	1	2	1	170	0	117	1	0	0	2	0	0	0	0	0	0	0	0	0	0	0	0	0	0	0
Basidiomycota	Agaricomycetes	Trechisporales	Hydnodontaceae	Trechispora	NM	ITS1_00654	0	1	0	0	1	0	0	0	0	0	0	146	1	0	0	0	0	0	0	0	0	0	0	0	0	0	0	0	0	0	0	0	0	0	0	0	0	0	0	0	142	0	0
Basidiomycota	Agaricomycetes	Thelephorales	Thelephoraceae		EcM	ITS1_00656	1	0	0	1	0	0	0	0	0	0	0	0	0	201	0	0	0	0	0	0	0	0	0	0	0	0	0	0	0	0	0	0	0	1	0	0	1	0	0	0	0	0	86
Basidiomycota	Agaricomycetes	Agaricales	Hygrophoraceae	Hygrocybe	NM	ITS1_00657	0	0	0	1	0	0	0	286	0	0	1	1	0	0	0	0	0	0	0	0	0	0	0	0	0	0	0	0	0	0	0	0	0	0	0	0	1	0	0	0	0	0	0
Basidiomycota	Agaricomycetes	Trechisporales			NM	ITS1_00658	1	0	0	0	0	0	0	0	0	0	0	0	234	0	0	0	0	0	0	0	0	0	0	0	0	0	0	0	0	0	0	0	0	0	0	0	0	0	0	0	0	54	0
Basidiomycota	Agaricomycetes	Russulales	Russulaceae	Russula	EcM	ITS1_00659	0	0	0	0	0	0	0	0	0	0	0	0	73	0	0	0	0	71	0	0	0	0	0	0	0	0	0	0	0	0	0	0	0	1	0	0	0	0	0	0	0	121	0
Ascomycota	Sordariomycetes	Hypocreales			NM	ITS1_00660	2	0	0	27	3	2	1	0	20	11	6	4	8	0	0	0	6	1	0	0	0	11	54	9	13	44	50	9	0	0	0	0	1	0	0	0	0	0	0	0	0	0	0
Basidiomycota	Agaricomycetes	Russulales	Russulaceae	Russula	EcM	ITS1_00662	0	0	0	0	0	0	0	0	89	0	0	1	0	2	0	0	0	0	0	0	0	0	0	0	0	0	0	0	0	0	0	0	0	0	0	0	0	195	0	0	1	0	0
Basidiomycota	Agaricomycetes	Russulales	Russulaceae	Lactarius	EcM	ITS1_00663	0	0	0	0	0	0	0	0	0	0	0	0	0	0	0	0	58	29	1	0	0	0	1	0	1	10	3	3	2	0	0	0	0	0	0	0	0	0	0	0	0	0	0
Basidiomycota	Agaricomycetes	Cantharellales	Clavulinaceae		EcM	ITS1_00664	0	0	0	235	0	0	0	0	0	1	0	1	0	0	0	0	0	5	0	0	0	0	0	0	0	0	0	0	0	0	0	0	43	0	0	0	0	0	0	0	0	0	0
Basidiomycota	Agaricomycetes	Thelephorales	Thelephoraceae		EcM	ITS1_00666	0	0	0	0	0	0	0	0	0	0	0	0	0	0	0	0	1	3	0	0	0	0	0	1	0	198	2	4	1	0	0	0	0	0	0	0	0	0	0	0	0	0	0
Basidiomycota	Agaricomycetes	Agaricales	Inocybaceae	Inocybe	EcM	ITS1_00667	0	0	0	126	1	0	0	0	1	0	0	0	0	1	0	0	0	0	0	0	0	0	0	0	0	0	0	0	0	0	0	0	156	0	0	0	1	0	0	0	0	0	0
Basidiomycota	Fungi_other				NM	ITS1_00668	2	0	0	142	0	0	0	2	0	0	0	0	0	0	1	0	0	0	0	0	0	0	0	0	0	0	0	0	0	0	1	0	136	0	0	0	0	0	0	0	0	0	0
Basidiomycota	Agaricomycetes	Agaricales		Camarophyllopsis	NM	ITS1_00669	0	0	0	0	0	0	0	0	0	0	0	0	0	0	0	0	0	0	12	0	0	0	0	0	0	0	0	0	0	0	0	0	0	0	0	0	0	0	0	0	0	0	0
Ascomycota	Geoglossomycetes	Geoglossales	Geoglossaceae	Trichoglossum	NM	ITS1_00670	0	0	0	0	0	0	0	1	0	0	0	0	0	0	0	0	0	0	0	0	0	0	0	0	0	0	0	0	0	0	0	0	0	2	0	0	281	0	1	0	0	0	0
Basidiomycota	Agaricomycetes	Thelephorales	Thelephoraceae		EcM	ITS1_00671	0	0	0	0	0	0	0	0	0	0	0	1	1	0	266	0	0	0	0	0	0	0	0	0	0	0	0	0	0	0	0	0	0	0	0	0	0	0	0	0	0	0	0
Basidiomycota	Agaricomycetes	Russulales	Russulaceae		EcM	ITS1_00672	0	0	0	0	0	0	0	0	0	0	0	101	0	0	0	0	0	0	0	0	0	0	0	0	0	0	0	0	0	0	1	0	0	1	0	0	0	0	0	11	157	0	0
Basidiomycota	Agaricomycetes	Agaricales	Strophariaceae	Anamika	EcM	ITS1_00673	0	0	0	0	0	0	11	1	1	1	0	0	0	78	0	0	0	0	0	0	0	8	1	19	1	0	0	0	0	0	0	0	0	0	0	30	0	0	0	0	0	1	118
Ascomycota	Pezizomycetes	Pezizales	Pezizaceae		EcM	ITS1_00675	0	0	0	0	0	0	0	216	1	2	0	0	0	0	1	1	0	0	0	0	0	0	0	0	0	0	0	0	0	0	0	0	0	0	0	0	59	0	0	0	0	0	0
Basidiomycota	Agaricomycetes	Cantharellales	Hydnaceae	Sistotrema	EcM	ITS1_00676	0	0	0	0	0	0	0	0	0	0	0	0	0	0	0	0	0	264	1	0	0	0	2	1	0	13	1	0	0	0	0	0	0	0	0	0	0	0	0	0	0	0	0
Basidiomycota	Agaricomycetes	Thelephorales	Thelephoraceae		EcM	ITS1_00677	0	0	0	0	0	0	0	0	0	0	0	0	0	0	0	0	56	4	0	1	1	0	0	3	0	110	3	3	2	0	0	0	0	0	0	0	0	0	0	0	0	0	0
Basidiomycota	Agaricomycetes	Sebacinales	Sebacinaceae		EcM	ITS1_00678	0	0	0	0	0	0	0	0	0	0	0	0	0	0	0	0	0	53	2	0	0	16	1	0	0	0	0	0	197	0	0	0	0	0	0	0	0	0	0	0	0	0	0
Basidiomycota	Agaricomycetes	Atheliales	Atheliaceae	Byssocorticium	EcM	ITS1_00679	0	0	0	0	0	0	0	0	0	0	0	0	0	0	0	0	33	1	0	0	1	33	3	114	4	2	0	23	0	0	0	0	0	0	0	0	0	0	0	0	0	0	0
Basidiomycota	Agaricomycetes	Thelephorales	Thelephoraceae		EcM	ITS1_00680	237	0	0	1	1	0	0	1	0	0	0	0	0	0	1	1	0	0	0	0	0	0	0	0	0	0	0	0	0	35	0	0	0	1	0	0	0	0	0	0	0	0	0
Basidiomycota	Agaricomycetes	Agaricales	Cortinariaceae	Cortinarius	EcM	ITS1_00681	0	0	0	0	0	0	0	0	0	0	0	0	0	0	0	0	0	0	0	1	0	1	241	3	1	0	0	1	0	0	0	0	0	0	0	0	0	0	0	0	0	0	0
Basidiomycota	Agaricomycetes	Agaricales	Clavariaceae		NM	ITS1_00682	0	0	0	0	0	0	0	0	0	0	0	0	0	232	0	3	0	0	0	0	0	0	0	0	0	0	0	0	0	0	0	0	0	0	0	0	0	0	0	0	0	0	41
Basidiomycota	Agaricomycetes	Thelephorales	Thelephoraceae		EcM	ITS1_00685	145	0	0	0	7	2	1	0	0	0	0	0	0	0	0	0	0	0	0	0	0	0	0	0	0	0	0	0	0	103	0	0	2	5	2	0	0	0	0	0	1	1	0
Basidiomycota	Agaricomycetes	Auriculariales			NM	ITS1_00686	0	0	0	0	0	0	0	0	0	0	0	0	0	0	0	0	0	0	264	0	0	0	0	0	0	0	0	0	1	0	0	0	0	0	0	0	0	0	0	0	0	0	0
Basidiomycota	Agaricomycetes	Thelephorales	Thelephoraceae		EcM	ITS1_00687	0	0	0	0	0	0	0	0	0	0	0	0	0	0	0	0	0	222	0	0	0	0	0	0	0	0	0	3	1	0	0	0	0	0	0	0	0	0	0	0	0	0	0
Basidiomycota	Agaricomycetes	Sebacinales	Serendipitaceae		NM	ITS1_00690	0	0	0	0	0	0	0	0	0	0	0	0	0	0	0	0	0	0	1	0	0	3	233	0	0	0	0	0	1	0	0	0	0	0	0	0	0	0	0	0	0	0	0
Ascomycota	Eurotiomycetes	Chaetothyriales			NM	ITS1_00692	0	0	0	0	0	0	0	0	0	0	0	0	0	0	0	0	0	1	0	0	0	0	0	0	0	0	0	1	270	0	0	0	0	0	0	0	0	0	0	0	0	0	0
Basidiomycota	Agaricomycetes	Agaricales	Cortinariaceae	Cortinarius	EcM	ITS1_00693	0	0	0	0	0	0	0	0	0	0	0	0	0	0	0	0	0	0	0	0	0	0	0	0	0	0	0	0	0	0	0	1	0	0	0	0	0	0	0	0	0	0	0
Basidiomycota	Agaricomycetes	Russulales	Russulaceae		EcM	ITS1_00694	0	0	0	0	0	0	0	0	0	0	0	0	0	0	0	0	0	1	0	0	0	0	0	0	0	252	0	4	3	0	0	0	0	0	0	0	0	0	0	0	0	0	0
Basidiomycota	Agaricomycetes	Russulales	Russulaceae	Russula	EcM	ITS1_00695	1	2	0	265	0	0	0	0	1	0	1	0	0	0	0	0	0	0	0	0	0	0	0	0	0	0	0	0	0	0	0	0	1	0	0	0	0	0	0	0	0	0	0
Ascomycota	Eurotiomycetes				NM	ITS1_00696	1	0	0	0	1	0	0	129	0	1	0	0	0	0	2	0	0	0	0	0	0	0	0	0	0	0	0	0	0	0	0	0	0	0	0	4	131	0	0	0	0	0	0
Basidiomycota	Agaricomycetes	Sebacinales			NM	ITS1_00697	0	0	0	0	0	2	0	0	0	0	0	0	0	0	0	17	0	2	13	0	32	122	20	2	0	9	0	39	1	0	0	0	0	0	0	0	0	0	0	0	0	0	0
Ascomycota	Leotiomycetes	Helotiales			NM	ITS1_00699	0	0	0	0	0	0	0	0	0	0	0	1	0	0	0	58	5	0	24	0	0	1	14	0	2	0	0	0	0	0	0	0	0	0	0	0	0	0	0	0	0	0	0
Basidiomycota	Agaricomycetes	Thelephorales	Thelephoraceae		EcM	ITS1_00700	1	0	0	0	1	0	0	168	0	0	0	0	0	1	0	0	0	0	0	0	0	0	0	0	0	0	0	0	0	0	0	0	1	0	0	0	94	0	0	0	1	0	0
Ascomycota	Eurotiomycetes	Chaetothyriales	Herpotrichiellaceae		NM	ITS1_00701	1	0	0	0	0	0	0	44	0	0	0	0	1	0	0	0	0	0	0	0	0	0	0	0	0	0	0	0	0	0	0	0	0	0	0	0	221	0	0	0	0	0	0
Ascomycota	Eurotiomycetes	Chaetothyriales	Herpotrichiellaceae		NM	ITS1_00702	0	0	0	10	1	0	0	0	0	0	0	0	0	0	0	0	4	72	0	17	3	0	0	0	0	75	15	15	0	0	0	0	12	0	0	0	0	0	0	0	0	0	0
Basidiomycota	Agaricomycetes	Cantharellales	Cantharellaceae	Craterellus	EcM	ITS1_00703	0	0	0	0	0	1	0	0	0	0	0	0	0	0	0	0	0	0	0	0	3	65	16	0	0	1	0	48	0	0	0	0	0	0	0	0	0	0	0	0	0	0	0
Basidiomycota	Agaricomycetes	Russulales	Russulaceae	Russula	EcM	ITS1_00704	0	0	0	0	1	0	0	0	45	0	0	0	0	0	0	0	0	1	0	0	1	0	0	178	0	1	0	1	0	0	0	0	0	0	0	0	0	14	0	0	0	0	0
Ascomycota	Sordariomycetes	Hypocreales	Hypocreaceae	Trichoderma	NM	ITS1_00705	1	1	0	0	2	0	0	1	12	0	0	0	2	4	2	0	117	0	0	0	0	40	14	1	26	4	33	6	0	0	0	0	0	0	0	0	0	0	0	0	0	0	0
Ascomycota	Eurotiomycetes	Chaetothyriales	Herpotrichiellaceae		NM	ITS1_00706	2	0	0	1	0	0	0	167	0	0	0	0	0	1	0	1	0	0	0	0	0	0	0	0	0	0	0	0	0	0	0	0	0	1	0	0	91	0	0	0	0	0	0
Basidiomycota	Agaricomycetes	Thelephorales	Thelephoraceae	Tomentella	NM	ITS1_00707	0	0	0	0	0	0	0	0	0	0	0	1	215	2	3	1	0	0	0	0	0	0	0	0	0	0	0	0	0	0	0	0	0	0	0	0	1	0	0	0	0	41	0
Basidiomycota	Agaricomycetes	Trechisporales			NM	ITS1_00708	1	11	1	0	0	0	0	0	0	0	0	0	0	1	0	161	3	2	0	0	0	0	0	0	2	0	0	0	0	0	3	1	1	0	0	0	0	0	0	0	0	0	1
Ascomycota	Geoglossomycetes	Geoglossales	Geoglossaceae	Trichoglossum	NM	ITS1_00709	0	0	0	0	0	0	0	0	0	0	0	0	0	0	0	0	0	0	0	0	0	0	0	0	0	0	0	0	0	0	0	0	0	1	0	0	261	0	0	0	0	0	1
Basidiomycota	Agaricomycetes	Cantharellales	Cantharellaceae	Pseudocraterellus	EcM	ITS1_00710	0	0	0	0	0	0	0	0	0	0	0	0	0	0	0	0	5	49	0	0	0	1	7	1	0	0	0	0	0	0	0	0	0	0	0	0	0	0	0	0	0	0	0
Basidiomycota	Agaricomycetes	Thelephorales	Thelephoraceae		EcM	ITS1_00711	1	0	0	1	0	0	56	0	129	2	0	0	1	58	1	0	0	0	0	0	0	0	0	0	0	0	0	0	0	0	0	0	0	0	0	4	0	6	0	0	0	0	1
Ascomycota	Eurotiomycetes				NM	ITS1_00713	0	0	0	0	0	0	0	2	0	61	0	0	0	1	0	0	21	0	0	0	0	0	0	0	2	0	0	0	0	0	0	0	0	0	0	1	4	0	121	0	0	1	0
Basidiomycota	Agaricomycetes	Russulales	Russulaceae	Russula	EcM	ITS1_00714	1	0	0	252	0	0	0	1	0	2	0	0	0	0	0	1	0	0	0	0	0	0	0	0	0	0	0	0	0	0	0	0	2	0	0	0	0	0	0	0	0	0	0
Basidiomycota	Agaricomycetes	Russulales	Russulaceae		NM	ITS1_00716	3	0	0	2	0	0	0	0	151	0	0	0	0	0	0	0	0	0	0	0	0	0	0	0	0	0	0	0	0	0	0	0	1	0	0	0	0	103	0	0	0	0	0
Basidiomycota	Agaricomycetes	Cantharellales	Cantharellaceae	Craterellus	EcM	ITS1_00717	0	0	0	0	0	0	0	0	0	0	0	0	0	0	0	0	0	0	0	0	0	0	0	0	0	0	0	0	0	0	0	0	0	0	0	0	0	0	0	0	0	0	0
Basidiomycota	Agaricomycetes	Sebacinales	Sebacinaceae		NM	ITS1_00718	1	0	0	0	0	0	0	0	0	0	0	0	0	0	0	38	0	0	166	0	0	0	0	0	0	0	0	0	0	0	0	0	0	0	0	0	0	0	0	0	0	0	0
Basidiomycota	Agaricomycetes	Atheliales	Atheliaceae		EcM	ITS1_00719	0	0	1	0	0	1	0	0	0	0	0	0	0	0	0	0	0	200	0	0	1	0	1	0	0	0	16	0	0	0	0	0	0	0	0	0	0	0	0	0	0	0	0
Basidiomycota	Agaricomycetes	Agaricales	Inocybaceae	Inocybe	EcM	ITS1_00720	0	0	0	0	1	0	98	0	0	0	0	0	1	0	0	0	0	0	0	0	0	0	0	0	0	0	0	0	0	0	0	0	0	0	0	156	0	0	0	0	0	0	0
Basidiomycota	Agaricomycetes	Cantharellales	Hydnaceae	Sistotrema	NM	ITS1_00721	1	104	46	0	0	0	0	2	0	0	0	0	0	2	0	1	1	0	2	0	0	0	2	0	0	0	0	0	0	0	70	24	0	0	0	0	0	0	0	0	0	0	0
Basidiomycota	Agaricomycetes	Thelephorales	Thelephoraceae		EcM	ITS1_00722	0	0	0	0	0	0	0	0	0	0	0	0	0	0	0	0	0	0	0	0	0	0	0	0	0	1	0	0	160	0	0	0	0	0	0	0	0	0	0	0	0	0	0
Basidiomycota	Agaricomycetes	Agaricales	Psathyrellaceae	Coprinopsis	NM	ITS1_00724	0	0	0	0	0	0	1	0	0	0	0	0	0	0	194	0	0	0	0	0	0	0	0	0	0	0	0	0	1	0	0	0	1	0	0	0	0	0	0	0	0	0	0
Mucoromycota	Mucoromycetes	Mucorales	Cunninghamellaceae	Gongronella	NM	ITS1_00726	0	0	0	0	0	0	0	0	0	0	0	0	0	0	0	0	0	0	0	0	0	0	0	0	0	0	0	0	0	37	0	2	0	0	0	0	0	182	9	2	2	0	0
Basidiomycota	Agaricomycetes	Agaricales	Bolbitiaceae	Timgrovea	EcM	ITS1_00729	0	0	0	0	0	1	0	0	0	0	0	0	0	0	0	0	26	9	0	42	0	1	2	40	0	29	13	2	3	0	0	0	0	0	0	0	0	0	0	0	0	0	0
Basidiomycota	Agaricomycetes	Agaricales	Inocybaceae	Inocybe	EcM	ITS1_00730	0	0	0	0	0	0	0	0	0	0	0	0	0	0	0	0	0	1	0	0	0	0	0	1	0	0	0	3	150	0	0	0	0	0	0	0	0	0	0	0	0	0	0
Basidiomycota	Agaricomycetes	Agaricales			EcM	ITS1_00731	0	0	0	0	1	0	0	0	0	0	167	0	0	0	0	1	0	0	0	0	0	0	0	0	0	0	0	0	0	0	0	0	0	0	0	0	0	0	0	86	0	0	0
Basidiomycota	Agaricomycetes	Thelephorales	Thelephoraceae		EcM	ITS1_00733	0	0	0	0	0	0	0	0	0	0	0	0	0	0	0	0	0	0	0	0	0	0	0	0	0	0	0	0	160	0	0	0	0	0	0	0	0	0	0	0	0	0	0
Basidiomycota	Agaricomycetes	Agaricales	Cortinariaceae	Cortinarius	EcM	ITS1_00734	0	0	0	0	0	0	0	0	0	0	0	0	0	0	0	0	0	0	0	0	0	0	166	0	0	0	0	20	1	0	0	0	0	0	0	0	0	0	0	0	0	0	0
Basidiomycota	Agaricomycetes	Russulales	Russulaceae	Russula	EcM	ITS1_00735	0	0	0	0	0	0	0	0	0	0	0	0	0	0	0	0	0	0	0	0	0	0	0	0	0	0	0	0	0	0	0	0	3	2	0	0	2	62	1	0	0	0	185
Basidiomycota	Agaricomycetes	Russulales	Russulaceae		EcM	ITS1_00736	0	0	0	0	0	0	0	0	0	0	0	0	0	0	0	0	0	33	0	0	0	0	1	0	0	0	0	110	0	0	0	0	0	0	0	0	0	0	0	0	0	0	0
Basidiomycota	Fungi_other				NM	ITS1_00737	1	1	0	0	0	0	0	0	0	0	2	0	209	0	0	0	0	0	0	0	0	0	0	0	0	0	0	0	0	0	1	0	0	0	0	0	0	0	0	0	0	40	0
Basidiomycota	Agaricomycetes	Agaricales	Hygrophoraceae	Hygrocybe	NM	ITS1_00738	1	0	0	1	1	0	0	162	0	0	0	0	0	0	0	0	0	0	0	0	0	0	0	0	0	0	0	0	0	0	0	0	0	0	0	0	87	0	0	0	0	0	0
Mucoromycota	Mucoromycetes	Umbelopsidales	Umbelopsidaceae	Umbelopsis	NM	ITS1_00739	0	0	0	0	0	0	0	0	0	0	0	0	0	0	0	0	7	0	3	0	0	0	1	0	2	3	13	0	0	0	0	0	0	0	0	0	0	0	0	0	0	0	0
Basidiomycota	Agaricomycetes	Boletales	Boletaceae	Boletus	EcM	ITS1_00741	0	0	0	0	10	4	0	0	0	0	0	54	1	0	1	0	0	0	0	0	0	0	0	0	0	0	0	0	0	2	0	0	0	77	23	1	9	0	1	4	62	3	0
Basidiomycota	Agaricomycetes	Thelephorales	Thelephoraceae	Tomentella	EcM	ITS1_00743	0	0	0	0	0	0	0	0	0	0	0	0	0	0	0	0	0	1	2	3	189	0	1	0	0	0	0	1	0	0	0	0	0	0	0	0	0	0	0	0	0	0	0
Basidiomycota	Agaricomycetes	Boletales			EcM	ITS1_00745	1	1	0	0	0	0	80	0	0	0	0	0	0	0	0	0	0	0	0	0	0	0	0	0	0	0	0	0	0	0	0	0	0	1	0	165	1	0	0	0	0	0	0
Basidiomycota	Agaricomycetes	Thelephorales	Thelephoraceae		EcM	ITS1_00746	0	0	0	0	0	0	8	0	49	0	0	0	0	175	1	1	0	0	0	0	0	0	0	0	0	0	0	0	0	0	0	0	0	0	0	1	0	1	0	0	0	1	14
Basidiomycota	Agaricomycetes	Sebacinales	Sebacinaceae		EcM	ITS1_00747	0	0	0	220	0	0	0	1	0	0	0	0	0	0	0	0	0	5	0	0	0	0	0	0	0	1	1	0	1	0	0	0	18	0	0	0	0	0	0	0	0	0	0
Basidiomycota	Agaricomycetes	Agaricales	Inocybaceae		EcM	ITS1_00748	0	0	0	0	0	0	0	0	0	0	0	0	0	1	88	1	0	0	0	0	0	0	0	0	0	0	0	0	0	0	0	0	0	0	0	0	0	0	0	0	0	0	0
Basidiomycota	Agaricomycetes	Agaricales	Cortinariaceae	Cortinarius	EcM	ITS1_00749	0	0	0	0	0	1	0	0	0	0	0	0	0	0	0	0	0	0	0	83	27	0	1	0	0	0	0	1	0	0	0	0	0	0	0	0	0	0	0	0	0	0	0
Basidiomycota	Agaricomycetes	Thelephorales	Thelephoraceae	Tomentella	EcM	ITS1_00750	0	0	0	0	0	0	0	0	0	0	0	0	0	0	0	0	1	0	0	0	0	157	64	1	3	0	0	12	1	0	0	0	0	0	0	0	0	0	0	0	0	0	0
Mortierellomycota	Mortierellomycetes	Mortierellales	Mortierellaceae	Mortierella	NM	ITS1_00751	16	23	4	79	0	0	0	1	0	0	0	0	1	0	0	0	0	0	0	0	0	0	0	0	0	0	0	0	0	16	25	11	71	0	0	0	0	0	0	0	0	0	0
Basidiomycota	Agaricomycetes	Agaricales	Cortinariaceae	Cortinarius	EcM	ITS1_00752	0	0	0	0	0	1	0	0	0	0	0	0	0	0	0	0	0	0	0	139	4	1	3	0	31	0	0	0	0	0	0	0	0	0	0	0	0	0	0	0	0	0	0
Basidiomycota	Agaricomycetes	Agaricales	Tricholomataceae		NM	ITS1_00753	0	0	0	0	0	0	0	0	0	0	0	0	0	0	0	128	0	1	41	0	0	0	0	0	0	0	0	1	0	1	0	0	1	1	0	0	0	0	0	0	0	0	0
Basidiomycota	Agaricomycetes	Trechisporales			NM	ITS1_00754	0	0	0	0	0	0	0	0	0	0	0	0	0	0	0	0	0	0	158	0	0	0	0	0	0	0	0	0	0	0	0	0	0	0	0	0	0	0	0	0	0	0	0
Basidiomycota	Agaricomycetes	Thelephorales	Thelephoraceae	Tomentella	EcM	ITS1_00755	0	0	0	0	0	0	0	0	0	0	0	158	0	0	2	0	0	0	0	0	0	0	0	0	0	0	0	0	0	1	0	0	0	1	0	0	2	0	1	0	82	0	0
Ascomycota	Sordariomycetes				NM	ITS1_00757	0	182	63	0	0	0	0	0	0	0	0	0	0	1	0	0	1	0	0	0	0	0	0	0	0	0	0	0	0	0	0	0	0	0	0	0	0	0	0	0	0	0	0
Basidiomycota	Agaricomycetes	Thelephorales	Thelephoraceae		EcM	ITS1_00758	192	1	0	0	0	0	0	0	0	0	0	2	0	0	1	0	0	0	0	0	0	0	0	0	0	0	0	0	0	51	0	0	0	0	0	0	0	0	0	0	0	0	0
Basidiomycota	Agaricomycetes	Cantharellales	Clavulinaceae	Clavulina	EcM	ITS1_00759	0	0	0	0	0	0	0	0	0	0	0	0	0	0	0	0	142	0	0	0	0	0	4	0	0	0	5	52	1	0	0	0	0	0	0	0	0	0	0	0	0	0	0
Basidiomycota	Agaricomycetes	Cantharellales	Clavulinaceae	Clavulina	NM	ITS1_00760	1	0	0	0	0	0	125	0	0	0	0	1	0	0	0	0	0	0	0	0	0	0	0	0	0	0	0	0	0	0	0	0	0	0	0	116	1	1	0	0	0	0	0
Basidiomycota	Agaricomycetes	Agaricales			NM	ITS1_00762	0	0	0	0	0	0	0	0	0	0	0	0	0	0	2	241	0	0	0	0	0	0	0	0	0	0	0	1	0	0	0	0	0	0	0	0	1	0	0	0	0	0	0
Ascomycota	Eurotiomycetes	Eurotiales	Trichocomaceae	Penicillium	NM	ITS1_00764	0	0	0	0	0	0	5	1	4	19	40	0	0	0	0	0	1	0	0	0	0	0	0	0	0	0	0	0	0	0	0	0	0	0	0	2	0	1	5	4	0	0	0
Basidiomycota	Agaricomycetes	Trechisporales	Hydnodontaceae	Trechispora	NM	ITS1_00765	0	0	0	0	0	0	0	0	0	72	0	66	1	4	0	0	0	0	0	0	0	0	0	0	0	0	0	0	0	0	0	0	0	0	0	0	0	0	38	0	62	1	0
Ascomycota	Eurotiomycetes	Eurotiales	Trichocomaceae	Penicillium	NM	ITS1_00768	0	0	0	0	0	0	0	0	0	0	0	0	0	0	0	0	0	0	0	0	0	0	0	0	0	0	1	0	0	0	0	0	0	0	0	0	7	1	81	101	0	0	0
Ascomycota	Saccharomycetes	Saccharomycetales	Dipodascaceae	Basidioascus	NM	ITS1_00770	3	0	0	0	97	72	0	2	0	0	0	0	0	1	1	0	0	0	0	0	0	0	0	2	0	0	0	0	0	2	0	0	1	42	17	0	0	0	0	0	0	0	0
Basidiomycota	Agaricomycetes	Russulales	Russulaceae	Russula	EcM	ITS1_00772	0	0	0	1	1	0	0	0	0	0	0	1	228	0	0	1	0	0	0	0	0	0	0	0	0	0	0	0	0	0	0	0	0	0	0	0	0	0	0	0	0	11	0
Basidiomycota	Agaricomycetes	Cantharellales	Ceratobasidiaceae		NM	ITS1_00773	1	0	0	0	0	0	6	0	0	1	1	2	2	27	185	3	0	0	0	0	0	0	0	0	0	0	0	0	0	0	0	0	0	0	0	1	0	0	0	0	0	0	2
Basidiomycota	Agaricomycetes	Sebacinales			NM	ITS1_00776	0	141	42	8	1	0	0	0	0	0	0	0	0	0	0	2	0	0	0	0	0	0	0	1	0	0	0	0	0	0	35	8	3	0	0	0	0	0	0	0	0	0	0
Basidiomycota	Agaricomycetes	Russulales	Russulaceae	Russula	EcM	ITS1_00778	0	0	0	0	0	1	0	0	0	0	0	0	0	0	0	0	0	0	0	0	1	0	0	116	1	0	0	0	0	0	0	0	0	0	0	0	0	0	0	0	0	0	0
Basidiomycota	Agaricomycetes	Agaricales	Cortinariaceae	Cortinarius	NM	ITS1_00779	0	0	0	0	0	0	0	0	0	0	0	0	0	0	0	0	0	0	0	0	0	0	151	0	0	0	0	0	0	0	0	0	0	0	0	0	0	0	0	0	0	0	0
Basidiomycota	Agaricomycetes	Boletales	Gyroporaceae	Gyroporus	EcM	ITS1_00780	0	0	0	0	0	0	0	0	17	0	0	0	0	111	0	0	0	0	0	0	0	0	0	0	0	0	0	0	0	0	0	0	1	0	0	2	0	29	0	0	0	1	80
Ascomycota	Lecanoromycetes				NM	ITS1_00781	0	0	0	0	0	0	0	0	0	0	0	0	0	0	0	0	0	0	0	0	0	0	0	0	0	0	0	0	241	0	0	0	0	0	0	0	0	0	0	0	0	0	0
Basidiomycota	Agaricomycetes	Agaricales	Amanitaceae	Amanita	EcM	ITS1_00782	0	0	0	0	0	0	0	0	0	4	0	73	0	0	0	0	0	0	0	0	0	0	0	0	0	0	0	0	0	0	0	0	0	0	0	0	2	0	18	1	142	0	0
Ascomycota	Archaeorhizomycetes	Archaeorhizomycetales	Archaeorhizomycetaceae	Archaeorhizomyces	NM	ITS1_00783	0	0	0	0	0	0	0	0	0	0	0	0	0	174	0	0	0	0	0	0	0	1	0	0	0	0	0	0	0	0	0	1	0	0	0	0	0	0	0	0	0	0	61
Basidiomycota	Agaricomycetes	Agaricales	Inocybaceae	Inocybe	EcM	ITS1_00784	0	0	0	2	0	0	0	228	0	1	1	1	0	0	1	0	0	0	0	0	0	0	0	0	0	0	0	0	0	0	0	0	0	0	0	0	3	0	0	0	0	0	0
Basidiomycota	Agaricomycetes	Russulales	Russulaceae	Lactarius	EcM	ITS1_00786	0	0	0	0	0	0	0	0	0	0	0	0	0	0	0	0	0	89	0	0	0	0	0	0	0	1	31	5	2	0	0	0	0	0	0	0	0	0	0	0	0	0	0
Basidiomycota	Agaricomycetes	Agaricales	Inocybaceae	Inocybe	EcM	ITS1_00787	0	0	0	0	0	0	0	0	0	0	0	21	0	0	0	1	0	0	0	0	0	0	0	0	0	0	0	0	0	0	0	0	1	2	0	0	2	0	0	0	208	0	0
Ascomycota	Eurotiomycetes	Eurotiales	Elaphomycetaceae		EcM	ITS1_00788	0	0	0	0	0	1	0	0	0	0	0	0	0	0	0	0	1	231	0	0	0	1	0	0	0	0	0	1	1	0	0	0	0	0	0	0	0	0	0	0	0	0	0
Basidiomycota	Agaricomycetes	Agaricales	Entolomataceae	Clitopilus	NM	ITS1_00789	2	8	1	0	5	3	0	0	2	0	0	5	0	0	65	0	0	0	0	0	0	0	0	4	0	1	0	0	0	4	1	2	1	18	9	8	0	0	4	6	5	1	0
Basidiomycota	Agaricomycetes	Russulales	Russulaceae		EcM	ITS1_00790	0	0	0	0	0	0	0	0	0	0	0	0	0	0	0	0	10	131	0	0	0	0	0	1	0	0	20	0	2	0	0	0	0	0	0	0	0	0	0	0	0	0	0
Basidiomycota	Agaricomycetes	Agaricales	Clavariaceae	Clavaria	NM	ITS1_00791	0	0	1	0	0	0	0	0	0	0	0	0	0	0	1	49	1	17	14	0	0	1	110	0	1	24	4	12	0	0	0	0	0	0	0	0	0	0	0	0	0	0	0
Basidiomycota	Agaricomycetes	Thelephorales	Thelephoraceae		EcM	ITS1_00792	0	0	0	0	0	0	0	1	0	0	0	0	0	0	199	0	0	0	0	0	0	0	0	0	0	0	0	0	0	0	0	0	0	0	0	0	0	0	0	0	0	0	0
Ascomycota	Sordariomycetes	Hypocreales	Clavicipitaceae		NM	ITS1_00793	0	0	0	0	0	0	0	0	0	0	0	0	8	0	0	3	86	1	8	4	0	27	1	1	7	9	79	1	1	0	0	0	0	0	0	0	0	0	0	0	0	0	0
Basidiomycota	Agaricomycetes	Russulales	Russulaceae	Russula	EcM	ITS1_00795	0	0	0	0	0	0	0	0	0	0	0	0	0	0	0	0	0	1	0	0	0	0	0	0	0	138	4	7	1	0	0	0	0	0	0	0	0	0	0	0	0	0	0
Basidiomycota	Agaricomycetes	Agaricales	Inocybaceae	Inocybe	EcM	ITS1_00796	1	0	0	0	58	46	0	0	0	0	0	0	0	0	0	0	0	1	0	0	0	0	0	1	0	0	0	0	0	0	0	0	0	98	22	0	1	0	0	0	0	0	0
Basidiomycota	Agaricomycetes	Agaricales	Cortinariaceae	Cortinarius	EcM	ITS1_00797	0	0	0	0	0	0	0	0	0	0	0	0	0	0	0	0	0	0	0	15	164	0	0	0	1	0	0	0	0	0	0	1	0	0	0	0	0	0	0	0	0	0	0
Basidiomycota	Agaricomycetes	Agaricales	Tricholomataceae	Tricholoma	EcM	ITS1_00798	0	0	0	0	0	0	0	0	0	0	0	0	0	0	0	0	0	0	0	0	0	0	1	0	0	208	2	4	2	0	0	0	0	0	0	0	0	0	0	0	0	0	0
Basidiomycota	Agaricomycetes	Cantharellales	Clavulinaceae	Clavulina	EcM	ITS1_00799	0	0	0	0	0	0	0	1	214	1	1	0	0	0	0	0	0	0	0	0	0	0	0	0	0	0	0	0	0	0	0	0	0	0	0	0	0	16	0	0	0	0	0
Basidiomycota	Agaricomycetes	Russulales	Russulaceae	Russula	EcM	ITS1_00800	0	0	0	0	0	0	0	0	0	0	0	0	0	0	0	0	11	5	0	0	0	0	0	1	0	60	13	62	2	0	0	0	0	0	0	0	0	0	0	0	0	0	0
Basidiomycota	Agaricomycetes	Thelephorales	Bankeraceae	Sarcodon	EcM	ITS1_00801	0	0	0	0	0	0	0	0	0	0	0	0	0	0	0	0	0	13	0	0	0	0	1	0	0	11	103	1	1	0	0	0	0	0	0	0	0	0	0	0	0	0	0
Basidiomycota	Agaricomycetes	Agaricales			NM	ITS1_00802	1	1	0	0	3	0	0	86	0	1	0	1	0	0	0	0	0	0	0	0	0	0	0	0	0	0	0	0	0	0	0	0	0	1	0	0	136	0	0	0	0	0	0
Basidiomycota	Agaricomycetes	Russulales	Russulaceae	Russula	EcM	ITS1_00803	0	0	0	0	0	0	0	0	0	0	0	0	0	0	0	0	0	0	0	0	0	0	0	0	8	0	0	206	1	0	0	0	0	0	0	0	0	0	0	0	0	0	0
Ascomycota	Eurotiomycetes	Eurotiales	Trichocomaceae	Penicillium	NM	ITS1_00804	0	0	0	0	0	0	0	0	0	149	12	0	0	0	0	0	68	0	0	0	0	0	0	0	0	0	0	1	0	0	0	0	0	0	0	0	0	0	0	1	0	0	0
Basidiomycota	Agaricomycetes	Agaricales	Bolbitiaceae	Conocybe	NM	ITS1_00805	0	0	0	0	0	0	0	0	0	0	0	0	0	0	118	3	0	0	0	0	0	0	0	0	0	0	0	0	0	0	0	0	0	0	0	0	1	0	0	0	0	0	0
Ascomycota	Pezizomycetes				EcM	ITS1_00806	0	0	0	0	0	0	0	95	0	1	0	0	0	0	0	0	0	0	0	0	0	0	0	0	0	0	0	0	0	0	0	0	0	0	0	0	133	0	0	0	0	0	0
Basidiomycota	Agaricomycetes	Auriculariales		Oliveonia	NM	ITS1_00807	0	74	16	0	0	0	0	0	0	0	0	0	0	0	0	0	0	0	0	0	0	0	0	0	0	0	0	0	0	0	71	68	0	0	0	0	0	0	0	0	0	0	0
Basidiomycota	Agaricomycetes	Russulales	Russulaceae	Russula	EcM	ITS1_00808	0	0	0	0	0	0	1	0	0	0	0	1	115	0	0	0	0	0	0	0	0	0	0	0	0	0	0	0	0	0	0	0	1	0	0	0	0	0	1	0	0	111	0
Basidiomycota	Agaricomycetes	Sebacinales	Sebacinaceae		NM	ITS1_00809	0	0	0	0	0	0	0	0	0	0	0	0	0	0	0	0	0	0	13	0	1	22	98	0	0	0	0	0	0	0	0	0	0	0	0	0	0	0	0	0	0	0	0
Ascomycota	Eurotiomycetes	Eurotiales	Trichocomaceae	Aspergillus	NM	ITS1_00810	0	0	0	1	0	0	0	1	0	68	123	0	0	0	0	1	0	0	0	0	0	0	0	0	0	0	0	0	0	0	0	0	0	0	0	0	0	1	16	18	0	0	0
Basidiomycota	Agaricomycetes	Agaricales	Tricholomataceae	Tricholoma	EcM	ITS1_00811	0	0	0	0	0	0	0	0	0	0	0	0	0	0	0	0	0	1	0	0	0	0	0	0	0	132	3	92	1	0	0	0	0	0	0	0	0	0	0	0	0	0	0
Basidiomycota	Agaricomycetes	Boletales	Boletaceae		EcM	ITS1_00812	0	0	0	0	0	0	0	0	0	0	0	0	0	0	0	0	0	0	0	0	0	0	0	0	0	0	0	0	0	0	0	0	229	0	0	0	0	0	0	0	0	0	0
Basidiomycota	Agaricomycetes	Thelephorales	Thelephoraceae	Tomentella	EcM	ITS1_00813	0	1	0	0	0	0	163	0	1	0	0	0	0	0	2	0	0	0	0	0	0	0	0	0	0	0	0	0	0	0	0	0	0	0	0	60	0	0	0	0	0	0	1
Basidiomycota	Agaricomycetes	Trechisporales			NM	ITS1_00814	0	0	0	0	0	0	0	0	0	0	0	0	0	0	0	0	0	0	0	0	0	0	0	0	0	0	0	0	73	0	0	0	0	0	0	0	0	0	0	0	0	0	0
Ascomycota	Eurotiomycetes	Chaetothyriales	Herpotrichiellaceae	Capronia	NM	ITS1_00815	0	0	0	0	0	0	0	0	0	0	0	0	0	0	0	0	7	0	0	125	45	0	0	0	0	0	1	0	0	0	0	0	0	0	0	0	0	0	0	0	0	0	0
Basidiomycota	Agaricomycetes	Agaricales	Cortinariaceae		EcM	ITS1_00816	0	0	0	0	0	0	0	0	0	0	0	0	0	0	0	0	0	0	0	149	13	0	0	0	0	0	0	0	0	0	0	0	0	0	0	0	0	0	0	0	0	0	0
Basidiomycota	Agaricomycetes	Russulales	Russulaceae	Lactarius	EcM	ITS1_00817	0	0	0	0	0	0	0	0	0	0	0	0	0	0	0	0	0	0	0	0	0	0	0	0	0	0	0	0	0	0	0	0	225	0	0	0	0	0	0	0	1	1	0
Basidiomycota	Agaricomycetes	Agaricales	Marasmiaceae	Marasmius	NM	ITS1_00818	0	0	0	0	0	0	1	0	0	0	0	0	0	0	224	1	0	0	0	0	0	0	0	0	0	0	0	0	0	0	0	0	0	0	0	0	0	0	0	0	0	0	0
Basidiomycota	Agaricomycetes	Cantharellales	Clavulinaceae	Clavulina	EcM	ITS1_00819	0	0	0	0	0	0	0	0	0	0	0	0	0	0	0	0	0	0	0	0	0	0	21	0	0	0	0	0	0	0	0	0	0	0	0	0	0	0	0	0	0	0	0
Basidiomycota	Agaricomycetes	Russulales	Russulaceae	Russula	EcM	ITS1_00820	0	0	0	0	0	0	0	0	0	0	0	0	0	0	0	0	0	0	0	0	0	0	0	0	0	0	0	0	0	0	0	0	0	0	0	0	0	0	0	0	0	0	0
Ascomycota	Leotiomycetes	Helotiales			NM	ITS1_00821	0	0	0	0	0	0	0	0	0	0	0	0	0	0	0	0	0	0	224	1	0	0	0	0	0	0	0	0	0	0	0	0	0	0	0	0	0	0	0	0	0	0	0
Basidiomycota	Agaricomycetes	Thelephorales	Thelephoraceae		EcM	ITS1_00822	1	1	0	0	0	0	0	197	0	0	0	0	0	0	0	0	0	0	0	0	0	0	0	0	0	0	0	0	0	0	0	0	0	0	0	0	21	0	0	0	0	1	0
Ascomycota	Eurotiomycetes				NM	ITS1_00823	0	0	0	0	0	1	0	12	0	0	0	0	0	0	1	0	0	0	0	0	0	0	0	0	0	0	0	0	0	0	0	0	0	132	43	0	33	0	0	0	0	0	0
Basidiomycota	Agaricomycetes	Agaricales	Amanitaceae		NM	ITS1_00825	0	0	0	0	0	0	0	0	0	0	0	0	0	0	0	0	0	0	0	197	0	0	0	0	0	0	0	0	0	0	0	0	0	0	0	0	0	0	0	0	0	0	0
Basal lineages2	Fungi_other				NM	ITS1_00826	0	0	0	0	0	0	0	0	0	0	0	0	0	0	0	0	0	0	0	0	128	0	0	0	0	0	0	1	0	0	0	0	0	0	0	0	0	0	0	0	0	0	0
Ascomycota	Dothideomycetes	Pleosporales			NM	ITS1_00827	0	0	0	0	0	0	0	0	0	0	0	0	1	0	0	0	1	0	35	0	0	1	0	0	0	0	3	1	16	0	0	1	0	0	1	0	0	0	0	0	0	0	0
Ascomycota	Lecanoromycetes	Peltigerales	Pannariaceae	Fuscopannaria	NM	ITS1_00828	0	0	0	0	0	0	0	0	0	0	0	0	0	0	0	0	0	0	0	0	0	0	0	0	0	0	0	0	45	0	0	0	0	0	0	0	0	0	0	0	0	0	0
Basidiomycota	Agaricomycetes	Agaricales	Agaricaceae	Lepiota	NM	ITS1_00829	0	0	0	0	0	1	0	0	0	0	0	0	0	0	0	0	0	0	2	0	0	0	0	194	0	2	0	1	0	0	0	0	0	0	0	0	0	0	0	0	0	0	0
Basidiomycota	Agaricomycetes	Agaricales	Inocybaceae	Inocybe	EcM	ITS1_00832	0	0	0	0	0	0	0	88	0	0	0	0	0	0	0	0	0	0	0	0	0	0	0	0	0	0	0	0	0	0	0	0	0	0	0	0	134	0	0	0	0	0	0
Basidiomycota	Agaricomycetes	Cantharellales	Clavulinaceae		EcM	ITS1_00833	0	0	0	0	0	0	0	0	0	0	0	0	0	0	0	0	8	136	0	0	0	5	7	0	0	0	0	0	0	0	0	0	0	0	0	0	0	0	0	0	0	0	0
Basidiomycota	Agaricomycetes	Russulales	Russulaceae		EcM	ITS1_00834	0	0	0	0	0	0	0	0	0	0	0	0	0	0	0	0	0	2	0	0	0	0	0	25	0	0	0	53	0	0	0	0	0	0	0	1	0	0	0	0	0	0	0
Basidiomycota	Agaricomycetes	Agaricales	Marasmiaceae	Marasmius	NM	ITS1_00835	0	0	0	0	0	0	0	0	0	0	0	0	0	0	2	0	0	0	0	0	0	0	0	0	0	0	0	0	0	0	0	0	1	0	0	0	1	0	0	0	0	1	0
Basidiomycota	Agaricomycetes	Auriculariales		Auricularia	NM	ITS1_00836	5	67	53	66	0	0	0	2	0	0	0	0	1	0	0	0	0	0	0	0	0	0	1	0	0	0	0	0	0	3	5	3	15	0	0	0	0	0	0	0	0	0	0
Ascomycota	Sordariomycetes	Hypocreales	Clavicipitaceae		NM	ITS1_00837	0	0	0	0	0	0	0	0	0	0	0	0	3	0	0	0	75	0	0	1	0	12	5	0	7	10	102	6	0	0	0	0	0	0	0	0	0	0	0	0	0	0	0
Basidiomycota	Agaricomycetes	Agaricales	Clavariaceae		NM	ITS1_00839	1	84	13	0	0	0	0	0	0	0	0	0	1	0	0	0	1	0	0	0	0	0	0	0	0	0	0	0	0	0	91	28	0	0	0	0	0	0	0	0	0	0	0
Basidiomycota	Agaricomycetes	Agaricales			EcM	ITS1_00840	0	0	0	0	0	0	0	0	0	0	0	0	100	1	0	0	0	0	0	0	0	0	0	0	0	0	0	0	0	0	0	0	0	1	0	2	0	0	0	0	0	115	0
Basidiomycota	Agaricomycetes	Boletales	Boletaceae		EcM	ITS1_00841	0	0	0	0	0	0	57	0	0	0	0	0	1	0	54	0	0	0	0	0	0	0	0	0	0	0	0	0	0	0	0	0	1	0	0	58	0	0	0	0	0	0	0
Basidiomycota	Agaricomycetes	Thelephorales	Thelephoraceae		EcM	ITS1_00842	0	0	0	0	0	0	0	0	0	0	0	0	0	215	2	0	0	0	0	0	0	0	0	0	0	0	0	0	0	0	0	0	0	0	0	0	0	0	0	0	0	0	1
Ascomycota	Eurotiomycetes	Chaetothyriales			NM	ITS1_00843	0	0	0	0	0	0	0	0	0	0	0	0	0	0	0	198	4	0	1	0	0	0	0	0	0	0	0	0	0	0	1	0	0	0	0	0	1	0	0	0	0	0	0
Mucoromycota	Mucoromycetes	Mucorales	Backusellaceae	Backusella	NM	ITS1_00844	0	0	0	0	0	0	0	0	0	0	0	0	0	0	0	0	0	0	0	0	0	0	0	0	0	0	0	0	0	0	0	0	0	0	0	0	0	217	0	0	0	0	0
Basidiomycota	Agaricomycetes	Thelephorales	Thelephoraceae	Tomentella	EcM	ITS1_00845	0	1	0	2	0	0	0	0	0	0	0	0	80	0	0	0	66	4	0	0	0	0	0	0	0	12	1	1	0	0	0	0	1	0	0	0	0	0	0	0	0	16	0
Ascomycota	Eurotiomycetes	Chaetothyriales	Herpotrichiellaceae	Cladophialophora	NM	ITS1_00846	2	0	0	48	30	16	0	3	46	0	0	0	0	44	0	1	0	0	0	0	0	0	0	13	0	0	1	4	0	0	0	0	1	2	0	0	0	1	0	0	0	0	4
Basidiomycota	Agaricomycetes	Atheliales	Atheliaceae		EcM	ITS1_00848	0	0	0	0	0	0	0	0	0	0	0	0	0	0	0	0	0	0	1	0	0	0	0	0	0	0	0	1	201	0	0	0	0	0	0	0	0	0	0	0	0	0	0
Basidiomycota	Agaricomycetes	Thelephorales	Thelephoraceae	Tomentella	EcM	ITS1_00851	0	0	0	2	0	0	0	0	0	0	0	0	0	0	0	0	0	6	1	0	1	0	1	195	0	0	0	0	0	0	0	0	0	0	0	0	0	0	0	0	0	0	0
Basidiomycota	Agaricomycetes	Agaricales	Hydnangiaceae	Laccaria	EcM	ITS1_00852	1	0	0	1	0	0	72	0	0	0	0	0	0	12	0	1	0	0	0	0	0	0	0	0	0	0	0	0	0	0	1	0	2	1	0	119	0	0	0	0	0	0	2
Basidiomycota	Agaricomycetes	Agaricales	Inocybaceae	Inocybe	EcM	ITS1_00853	0	0	0	0	0	0	0	0	0	0	0	0	0	0	0	0	0	4	0	0	0	0	0	0	0	0	0	196	0	0	0	0	0	0	0	0	0	0	0	0	0	0	0
Basidiomycota	Agaricomycetes	Thelephorales	Thelephoraceae		EcM	ITS1_00854	158	0	0	2	3	6	10	0	0	0	1	0	0	0	0	0	0	0	0	0	0	0	0	0	0	0	0	0	0	31	0	0	1	0	0	0	1	0	0	0	0	0	0
Basidiomycota	Agaricomycetes	Agaricales	Cortinariaceae	Cortinarius	EcM	ITS1_00855	0	0	0	0	0	0	0	0	0	0	0	0	0	0	0	0	0	2	0	0	0	0	208	2	0	0	0	0	0	0	0	0	0	0	0	0	0	0	0	0	0	0	0
Ascomycota	Sordariomycetes				NM	ITS1_00856	0	0	0	0	0	0	0	0	161	0	0	0	0	0	0	1	0	0	0	0	0	0	0	0	0	0	0	0	0	0	0	0	0	0	0	0	0	50	0	0	0	0	0
Basidiomycota	Agaricomycetes	Boletales			EcM	ITS1_00857	0	0	0	0	0	0	76	1	0	0	0	1	0	0	102	0	0	0	0	0	0	0	0	0	0	0	0	0	0	0	0	0	0	0	0	12	0	0	0	0	0	0	0
Basidiomycota	Agaricomycetes	Thelephorales	Thelephoraceae	Tomentella	EcM	ITS1_00858	0	0	0	0	0	0	0	0	0	0	0	0	0	0	0	0	0	0	1	0	0	0	140	0	0	0	1	0	0	0	0	0	0	0	0	0	0	0	0	0	0	0	0
Basidiomycota	Agaricomycetes	Russulales	Russulaceae	Russula	EcM	ITS1_00859	0	0	0	0	0	0	0	0	0	0	0	0	0	0	0	0	0	0	0	1	4	0	163	0	0	0	0	3	0	0	0	0	0	0	0	0	0	0	0	0	0	0	0
Basidiomycota	Agaricomycetes	Agaricales		Camarophyllopsis	NM	ITS1_00860	0	0	0	0	1	0	0	0	0	0	0	0	0	0	0	0	0	0	0	0	0	0	0	0	0	0	0	0	0	0	0	0	0	0	0	0	209	0	0	0	0	0	0
Basidiomycota	Agaricomycetes	Agaricales	Clavariaceae		NM	ITS1_00861	1	0	0	0	0	0	1	184	0	0	0	0	0	0	0	0	0	0	0	0	0	0	0	0	0	0	0	0	0	0	0	0	0	0	0	0	24	0	0	0	0	0	0
Basidiomycota	Agaricomycetes	Russulales	Russulaceae	Russula	EcM	ITS1_00862	0	0	0	0	0	0	0	0	0	0	0	0	0	0	0	0	84	31	0	0	0	0	1	2	0	1	83	7	1	0	0	0	0	0	0	0	0	0	0	0	0	0	0
Basidiomycota	Agaricomycetes	Agaricales	Hygrophoraceae		EcM	ITS1_00863	0	0	0	170	0	0	0	0	0	0	0	0	0	0	0	0	0	0	0	0	0	0	0	0	0	0	0	0	0	0	0	0	39	0	0	0	0	0	0	0	0	0	0
Ascomycota	Dothideomycetes	Hysteriales	Gloniaceae	Cenococcum	NM	ITS1_00864	0	0	0	0	0	0	0	0	0	0	0	0	0	0	0	0	0	0	0	0	0	0	0	0	0	0	0	0	1	0	0	0	43	0	0	0	0	0	0	0	0	0	0
Basidiomycota	Agaricomycetes	Cantharellales	Clavulinaceae	Clavulina	EcM	ITS1_00866	0	0	0	0	0	0	0	0	0	0	0	0	0	0	0	0	0	0	1	0	0	0	0	0	0	0	0	0	118	0	0	0	0	0	0	0	0	0	0	0	0	0	0
Basidiomycota	Agaricomycetes	Agaricales	Cortinariaceae	Cortinarius	EcM	ITS1_00867	0	0	0	0	0	0	0	0	0	0	0	0	0	0	0	0	19	160	0	0	0	0	4	1	0	0	0	1	0	0	0	0	0	0	0	0	0	0	0	0	0	0	0
Mortierellomycota	Mortierellomycetes	Mortierellales	Mortierellaceae	Mortierella	NM	ITS1_00868	0	0	0	0	0	0	0	0	0	0	0	0	0	1	52	0	0	0	0	0	0	0	0	0	0	0	0	0	0	0	0	0	0	0	0	2	0	2	1	0	0	0	1
Basidiomycota	Agaricomycetes	Cantharellales	Cantharellaceae	Pseudocraterellus	EcM	ITS1_00870	0	0	0	0	0	0	0	0	0	0	0	0	0	0	0	0	0	1	0	202	0	0	0	0	3	0	0	0	0	0	0	0	0	0	0	0	0	0	0	0	0	0	0
Basidiomycota	Agaricomycetes	Thelephorales	Thelephoraceae		EcM	ITS1_00871	1	1	0	152	1	0	0	2	1	0	0	0	1	2	2	0	0	0	0	0	0	0	0	0	0	0	0	0	0	0	0	0	42	0	0	0	0	0	0	0	0	0	0
Basidiomycota	Agaricomycetes	Agaricales	Hydnangiaceae		EcM	ITS1_00873	0	0	0	0	0	0	0	0	0	0	0	0	0	0	0	0	2	2	0	0	0	38	141	1	2	0	1	18	0	0	0	0	0	0	0	0	0	0	0	0	0	0	0
Ascomycota	Sordariomycetes	Hypocreales			NM	ITS1_00874	6	1	0	0	2	1	10	0	137	0	0	0	0	0	0	0	0	0	0	0	0	5	0	2	35	5	0	0	0	0	0	0	0	0	0	0	0	0	0	0	0	0	0
Basidiomycota	Agaricomycetes	Agaricales	Cortinariaceae	Cortinarius	EcM	ITS1_00875	0	0	0	0	0	0	0	0	0	0	0	0	0	0	0	0	0	0	1	151	4	0	0	0	0	0	0	0	0	0	0	0	0	0	0	0	0	0	0	0	0	0	0
Basidiomycota	Agaricomycetes	Cantharellales	Ceratobasidiaceae		EcM	ITS1_00876	0	0	0	0	1	0	0	0	0	0	1	1	0	0	0	0	0	0	0	0	0	0	0	0	0	0	0	1	0	2	0	0	20	33	13	1	22	0	6	18	71	0	1
Ascomycota	Eurotiomycetes	Chaetothyriales	Herpotrichiellaceae		NM	ITS1_00879	0	7	0	2	11	7	0	0	0	0	0	0	0	0	0	0	0	0	0	0	0	1	0	0	0	0	0	0	0	0	17	8	4	117	26	0	0	0	0	0	0	0	0
Ascomycota	Eurotiomycetes	Eurotiales	Trichocomaceae		NM	ITS1_00880	0	0	0	0	0	0	0	0	0	0	0	0	0	0	0	0	0	0	0	0	0	0	0	0	1	0	0	0	0	0	0	0	0	0	0	0	0	0	0	0	0	2	0
Basidiomycota	Agaricomycetes	Russulales	Russulaceae	Lactarius	EcM	ITS1_00881	0	0	0	0	0	0	0	0	0	0	0	0	90	1	0	0	0	2	0	0	0	0	0	0	0	0	0	0	0	0	0	0	3	0	0	0	1	0	0	0	0	101	0
Basidiomycota	Agaricomycetes	Trechisporales			NM	ITS1_00882	0	0	0	0	0	1	0	0	0	0	0	0	1	0	0	108	1	59	0	11	17	0	0	0	0	1	0	1	0	0	0	0	0	0	0	0	0	0	0	0	0	0	0
Basidiomycota	Agaricomycetes	Thelephorales	Thelephoraceae	Tomentella	EcM	ITS1_00884	0	0	0	0	0	0	0	0	0	0	0	0	0	0	0	0	2	0	0	0	0	0	0	0	0	0	0	105	1	0	0	0	0	0	0	0	0	0	0	0	0	0	0
Basidiomycota	Agaricomycetes	Russulales	Russulaceae	Russula	EcM	ITS1_00886	0	0	0	0	0	0	0	0	0	0	0	0	0	0	0	0	0	0	0	0	0	0	0	186	1	0	0	1	0	0	0	0	0	0	0	0	0	0	0	0	0	0	0
Basidiomycota	Agaricomycetes	Auriculariales		Auricularia	EcM	ITS1_00887	0	0	0	0	0	0	0	0	0	0	0	0	0	0	0	0	0	153	0	0	0	0	0	0	0	0	0	0	0	0	0	0	0	0	0	0	0	0	0	0	0	0	0
Basidiomycota	Agaricomycetes	Boletales	Sclerodermataceae	Scleroderma	EcM	ITS1_00888	0	93	18	0	0	0	1	0	13	0	0	0	0	0	1	0	0	0	0	0	0	0	0	0	0	0	0	0	0	1	46	9	1	2	0	0	0	12	0	0	0	0	0
Basidiomycota	Agaricomycetes	Thelephorales	Thelephoraceae	Tomentella	EcM	ITS1_00889	0	0	0	0	0	0	0	0	0	0	0	0	0	0	0	0	3	30	0	0	0	0	0	0	2	47	2	113	2	0	0	0	0	0	0	0	0	0	0	0	0	0	0
Basidiomycota	Agaricomycetes	Thelephorales	Thelephoraceae	Tomentella	EcM	ITS1_00890	0	0	0	0	0	0	0	0	0	0	0	0	0	0	0	0	0	0	0	0	0	2	189	1	0	0	1	4	1	0	0	0	0	0	0	0	0	0	0	0	0	0	0
Ascomycota	Eurotiomycetes	Chaetothyriales			NM	ITS1_00891	0	0	0	0	0	0	0	0	0	0	0	0	0	0	1	85	0	2	44	0	0	0	1	0	4	5	0	3	0	0	1	0	0	0	0	0	0	0	0	0	0	0	0
Ascomycota	Eurotiomycetes	Chaetothyriales	Herpotrichiellaceae		NM	ITS1_00892	0	1	0	0	8	6	0	11	0	0	0	0	0	10	0	0	0	1	0	1	0	0	0	0	0	0	0	0	0	0	0	0	0	34	5	0	99	0	0	0	0	0	19
Mucoromycota	Mucoromycetes	Umbelopsidales	Umbelopsidaceae	Umbelopsis	NM	ITS1_00893	0	0	0	0	0	0	0	0	0	0	0	0	0	0	0	0	2	0	0	1	0	0	0	0	0	1	0	1	0	0	0	0	0	0	0	0	0	0	0	0	0	1	0
Chytridiomycota	Chytridiomycetes	Spizellomycetales	Spizellomycetaceae	Powellomyces	NM	ITS1_00894	0	0	0	0	0	0	0	0	0	0	1	0	1	109	0	0	0	0	0	0	0	0	0	0	0	0	0	0	0	0	0	0	1	0	0	0	1	0	0	0	0	0	84
Basidiomycota	Agaricomycetes	Thelephorales	Thelephoraceae		EcM	ITS1_00896	0	0	0	1	0	0	0	0	0	30	3	15	21	3	42	0	0	0	0	0	0	0	0	0	0	0	0	0	0	0	0	0	1	0	0	0	0	0	36	1	2	6	0
Basidiomycota	Agaricomycetes	Agaricales	Inocybaceae	Inocybe	EcM	ITS1_00898	0	0	0	0	0	0	0	0	0	0	0	0	0	0	0	0	4	178	2	0	0	0	0	0	0	0	9	1	2	0	0	0	0	0	0	0	0	0	0	0	0	0	0
Ascomycota	Eurotiomycetes	Chaetothyriales	Herpotrichiellaceae		NM	ITS1_00899	0	0	0	0	0	0	0	3	0	0	0	0	0	0	0	0	0	0	0	0	0	0	0	0	0	0	0	0	0	0	0	1	2	40	12	7	94	0	0	1	0	0	30
Basidiomycota	Agaricomycetes	Thelephorales	Thelephoraceae	Tomentella	EcM	ITS1_00900	0	0	0	0	0	0	0	0	0	0	0	0	0	0	0	0	11	151	0	0	0	0	0	0	0	0	0	0	0	0	0	0	0	0	0	0	0	0	0	0	0	0	0
Ascomycota	Dothideomycetes				NM	ITS1_00901	0	1	0	0	31	22	0	55	1	0	0	0	0	49	0	0	0	0	0	0	1	0	0	0	0	0	0	0	0	0	0	0	0	6	2	0	15	0	1	0	0	0	12
Basidiomycota	Agaricomycetes	Russulales	Russulaceae	Russula	EcM	ITS1_00903	0	0	0	0	0	0	0	0	0	0	0	0	0	0	0	0	0	0	0	0	0	0	0	0	0	0	0	0	0	0	0	0	0	0	0	0	0	0	37	90	31	37	0
Ascomycota	Dothideomycetes	Hysteriales	Gloniaceae	Cenococcum	EcM	ITS1_00905	0	0	0	0	2	1	0	2	0	0	0	0	0	0	1	0	1	1	0	0	0	1	0	0	0	1	0	1	0	0	0	0	3	87	19	0	20	0	0	0	0	0	0
Basidiomycota	Agaricomycetes	Agaricales	Inocybaceae		EcM	ITS1_00906	0	0	0	0	0	0	0	0	1	0	0	0	0	0	0	0	0	0	0	0	0	0	0	0	0	0	0	0	0	0	1	0	0	0	0	0	0	193	0	0	0	0	0
Ascomycota	Sordariomycetes	Hypocreales	Hypocreaceae	Hypocrea	NM	ITS1_00907	0	0	0	0	0	0	0	0	0	0	0	0	72	0	0	0	29	13	1	8	10	4	0	0	3	6	47	0	0	0	0	0	0	0	0	0	0	0	0	0	0	0	0
Basidiomycota	Agaricomycetes	Russulales	Russulaceae	Russula	EcM	ITS1_00908	0	0	0	0	0	0	0	0	0	0	0	0	0	0	0	0	0	3	1	0	0	0	0	168	1	1	0	0	2	0	0	0	0	0	0	0	0	0	0	0	0	0	0
Basidiomycota	Agaricomycetes	Thelephorales	Thelephoraceae	Tomentella	EcM	ITS1_00909	0	0	0	0	0	0	0	0	0	0	0	0	0	0	0	0	0	1	0	0	0	0	1	0	11	77	0	104	1	0	0	0	0	0	0	0	0	0	0	0	0	0	0
Basidiomycota	Agaricomycetes	Sebacinales	Sebacinaceae		NM	ITS1_00910	0	0	1	0	0	0	0	0	0	0	0	0	0	0	0	0	0	1	10	0	0	32	149	0	1	0	0	1	0	0	0	0	0	0	0	0	0	0	0	0	0	0	0
Basidiomycota	Agaricomycetes	Agaricales	Inocybaceae	Inocybe	EcM	ITS1_00911	0	0	0	0	0	0	0	0	0	0	0	0	0	0	0	0	14	108	0	0	0	0	1	0	0	0	1	0	1	0	0	0	0	0	0	0	0	0	0	0	0	0	0
Basidiomycota	Agaricomycetes	Agaricales	Clavariaceae		NM	ITS1_00913	0	0	0	1	0	0	0	0	0	0	0	0	0	0	0	193	0	0	0	0	0	0	0	0	0	0	0	0	0	0	0	0	0	0	0	0	0	0	0	0	0	0	0
Basidiomycota	Agaricomycetes	Boletales	Boletaceae		EcM	ITS1_00914	0	1	0	188	0	0	0	1	0	0	1	0	0	0	0	0	0	0	0	0	0	0	0	0	0	0	0	0	0	0	0	0	2	0	0	0	0	0	0	0	0	0	0
Basidiomycota	Agaricomycetes	Cantharellales	Clavulinaceae	Clavulina	EcM	ITS1_00915	0	0	0	0	0	0	0	0	0	0	0	0	0	0	0	0	0	0	179	0	0	0	1	0	1	0	1	0	0	0	0	0	0	0	0	0	0	0	0	0	0	0	0
Basidiomycota	Agaricomycetes	Agaricales	Hydnangiaceae	Laccaria	EcM	ITS1_00916	2	1	0	87	0	0	0	0	0	0	0	1	1	0	0	0	0	0	0	0	0	0	0	0	0	0	0	0	0	0	0	0	100	0	0	0	0	1	0	0	0	0	0
Basidiomycota	Agaricomycetes	Russulales	Russulaceae		EcM	ITS1_00917	0	0	0	0	0	0	0	0	0	0	0	0	0	0	0	0	0	177	0	0	0	0	0	0	0	0	0	1	0	0	0	0	0	0	0	0	0	0	0	0	0	0	0
Ascomycota	Leotiomycetes	Helotiales			NM	ITS1_00918	5	18	2	0	2	9	0	0	0	0	0	0	0	0	0	14	8	1	2	0	0	2	16	16	13	62	9	2	2	0	1	1	0	0	0	0	0	0	0	0	0	0	0
Basidiomycota	Agaricomycetes	Russulales	Russulaceae		EcM	ITS1_00919	0	0	0	0	0	0	0	0	0	0	0	0	0	0	0	0	0	0	0	141	0	5	5	0	0	0	0	12	0	0	0	0	0	0	0	0	0	0	0	0	0	0	0
Basidiomycota	Agaricomycetes	Agaricales	Marasmiaceae	Hydropus	NM	ITS1_00920	0	51	16	1	0	0	0	1	77	0	1	0	0	0	0	1	0	0	0	0	2	0	3	0	1	0	0	0	1	0	27	10	0	0	0	0	0	0	0	0	0	0	0
Basidiomycota	Agaricomycetes	Thelephorales	Thelephoraceae	Tomentella	EcM	ITS1_00921	0	0	0	0	0	0	0	0	0	0	0	0	0	0	0	0	0	1	0	0	0	16	116	2	0	0	0	0	0	0	0	0	0	0	0	0	0	0	0	0	0	0	0
Basidiomycota	Agaricomycetes	Agaricales	Inocybaceae	Inocybe	EcM	ITS1_00922	0	0	0	0	0	0	0	0	0	0	0	0	0	0	0	0	0	115	0	0	0	0	1	0	0	0	4	0	1	0	0	0	0	0	0	0	0	0	0	0	0	0	0
Basidiomycota	Agaricomycetes	Agaricales	Psathyrellaceae	Coprinopsis	NM	ITS1_00923	0	0	0	0	0	0	0	0	0	0	0	0	0	0	36	0	0	0	0	0	0	0	0	0	0	0	0	0	0	0	0	0	0	0	0	0	0	0	0	0	0	0	0
Basidiomycota	Agaricomycetes	Cantharellales	Ceratobasidiaceae		NM	ITS1_00924	1	96	25	0	0	0	0	0	0	0	0	0	0	0	1	0	0	0	0	0	0	0	2	0	0	0	0	0	0	0	41	23	0	0	0	0	0	0	0	0	0	0	0
Basidiomycota	Agaricomycetes	Boletales	Boletaceae		EcM	ITS1_00925	9	0	0	15	20	26	0	0	7	0	5	2	0	1	1	0	0	0	0	0	0	0	0	0	0	0	0	0	0	12	0	0	30	40	6	0	0	7	0	7	2	0	0
Basidiomycota	Agaricomycetes	Russulales	Russulaceae	Russula	EcM	ITS1_00926	0	0	0	0	0	0	0	0	0	0	0	0	0	0	0	0	0	0	0	0	0	0	0	0	0	0	0	0	0	0	0	0	1	150	26	0	7	0	0	0	0	0	0
Basidiomycota	Agaricomycetes	Agaricales	Porotheleaceae	Porotheleum	NM	ITS1_00927	1	0	0	1	0	0	0	0	143	0	0	38	1	0	0	0	0	0	0	0	0	0	0	0	0	0	0	0	0	0	0	0	0	0	0	0	0	4	0	0	1	0	0
Basidiomycota	Agaricomycetes	Agaricales	Cortinariaceae	Cortinarius	EcM	ITS1_00928	0	0	0	0	0	0	0	0	0	0	0	0	0	0	0	0	0	0	0	157	0	0	1	0	0	0	0	0	0	0	0	0	0	0	0	0	0	0	0	0	0	0	0
Basidiomycota	Agaricomycetes	Thelephorales	Thelephoraceae		EcM	ITS1_00929	0	0	0	0	0	0	0	0	0	0	0	0	0	0	0	0	0	1	0	0	0	0	0	0	0	0	0	0	83	0	0	0	0	0	0	0	0	0	0	0	0	0	0
Basidiomycota	Agaricomycetes	Trechisporales			NM	ITS1_00930	4	0	0	2	35	16	0	0	0	0	1	0	0	1	0	0	2	0	0	0	0	0	0	55	0	0	0	3	0	2	0	0	2	16	3	0	0	0	0	0	0	0	0
Basidiomycota	Agaricomycetes	Thelephorales	Thelephoraceae		EcM	ITS1_00931	0	0	0	0	0	0	0	0	0	0	0	0	0	0	0	0	0	0	0	0	0	0	0	0	0	0	0	0	0	0	0	0	0	165	21	0	0	0	0	0	0	0	0
Basidiomycota	Agaricomycetes	Russulales	Russulaceae	Russula	EcM	ITS1_00932	0	0	0	0	0	0	0	0	0	0	0	1	138	1	0	0	0	0	0	0	0	0	0	0	0	0	0	0	0	0	0	0	1	0	0	1	0	0	0	0	0	47	0
Basidiomycota	Agaricomycetes	Agaricales	Psathyrellaceae	Psathyrella	NM	ITS1_00933	0	0	0	0	0	0	0	0	0	0	0	0	0	0	2	0	0	0	0	0	0	0	0	0	0	0	0	0	0	0	0	0	0	0	0	0	1	1	0	0	0	1	0
Basidiomycota	Agaricomycetes	Russulales	Russulaceae	Gymnomyces	EcM	ITS1_00934	0	0	0	20	0	0	0	0	0	0	0	0	0	0	0	0	0	0	0	0	0	0	0	0	0	0	0	0	0	0	0	0	168	0	0	0	1	0	0	0	0	0	0
Basidiomycota	Agaricomycetes	Polyporales	Ganodermataceae	Ganoderma	NM	ITS1_00935	0	0	0	0	1	0	28	1	4	1	0	1	0	1	109	0	0	0	0	0	0	0	0	0	0	0	0	0	0	0	0	0	1	0	0	18	0	0	0	0	0	0	1
Ascomycota	Eurotiomycetes	Chaetothyriales			NM	ITS1_00936	0	0	0	0	0	0	0	0	0	0	0	0	0	0	0	5	0	0	51	18	0	1	1	0	1	64	13	4	2	0	0	0	0	0	0	0	0	0	0	0	0	0	0
Basidiomycota	Agaricomycetes	Boletales	Boletaceae		EcM	ITS1_00937	0	0	0	1	0	0	0	0	0	0	1	104	0	0	0	0	0	0	0	0	0	0	0	0	0	0	0	0	0	0	0	0	0	0	0	0	0	0	1	0	80	0	0
Basidiomycota	Agaricomycetes	Russulales	Russulaceae	Russula	EcM	ITS1_00938	0	0	0	0	0	0	0	0	0	0	0	0	0	0	0	0	110	15	1	0	1	0	0	1	0	0	1	1	0	1	0	0	0	0	0	0	0	0	0	0	0	0	0
Basidiomycota	Fungi_other				NM	ITS1_00939	0	0	0	0	0	0	0	0	0	0	0	0	0	0	0	0	0	0	0	0	0	0	0	0	0	0	0	0	0	0	0	0	0	0	0	0	186	0	0	0	0	0	0
Basal lineages7	Fungi_other				NM	ITS1_00940	0	0	0	0	0	0	0	0	0	0	0	0	0	0	0	0	0	0	0	0	0	0	0	0	0	0	0	0	0	0	0	0	0	0	0	0	9	0	25	66	83	3	0
Basidiomycota	Agaricomycetes	Russulales	Russulaceae	Gymnomyces	EcM	ITS1_00941	0	0	0	0	0	0	0	0	0	0	0	0	0	0	0	0	0	0	0	0	0	0	0	0	0	0	0	0	0	0	0	0	186	0	0	0	0	0	0	0	0	0	0
Basidiomycota	Agaricomycetes	Sebacinales	Serendipitaceae		NM	ITS1_00942	0	0	0	0	0	0	0	0	0	0	0	0	0	0	0	0	0	0	174	1	0	0	0	0	0	0	0	0	0	0	0	0	0	0	0	0	0	0	0	0	0	0	0
Basidiomycota	Agaricomycetes	Russulales	Russulaceae	Russula	EcM	ITS1_00943	0	0	0	0	1	0	0	0	0	0	1	0	177	0	0	0	0	0	0	0	0	0	0	0	0	0	0	0	0	0	0	0	0	0	0	0	0	0	0	0	0	6	0
Ascomycota	Leotiomycetes	Leotiales	Leotiaceae	Leotia	NM	ITS1_00944	0	0	0	0	0	0	0	0	0	0	0	0	0	0	0	0	2	19	0	0	0	0	0	0	0	4	0	0	0	0	0	2	0	1	1	0	0	0	0	0	0	0	0
Ascomycota	Eurotiomycetes	Eurotiales	Trichocomaceae	Penicillium	NM	ITS1_00945	0	0	0	0	1	0	2	0	89	33	2	0	0	0	0	0	1	0	0	0	0	1	1	0	0	0	0	0	0	0	0	0	0	0	0	4	0	6	4	13	0	0	0
Basidiomycota	Agaricomycetes	Russulales	Russulaceae	Lactarius	EcM	ITS1_00946	0	0	0	0	0	0	0	0	0	0	0	0	0	0	0	0	0	1	0	0	2	0	1	111	0	0	0	1	0	0	0	0	0	0	0	0	0	0	0	0	0	0	0
Mortierellomycota	Mortierellomycetes	Mortierellales	Mortierellaceae	Mortierella	NM	ITS1_00947	0	1	0	0	0	0	0	0	0	0	0	0	0	0	98	0	0	0	0	0	0	0	0	0	0	0	0	0	0	0	0	0	1	0	0	0	0	0	0	0	0	0	0
Mucoromycota	Mucoromycetes				NM	ITS1_00950	0	0	0	2	0	0	0	0	0	51	44	80	2	0	0	0	0	0	0	0	0	0	0	0	0	0	0	0	0	0	0	0	0	0	0	0	0	0	2	1	2	0	0
Basidiomycota	Agaricomycetes	Russulales	Russulaceae	Russula	EcM	ITS1_00951	0	0	0	115	0	0	0	0	0	0	0	0	0	0	0	0	0	0	0	0	0	0	0	0	0	0	0	0	0	0	0	0	69	0	0	0	0	0	0	0	0	0	0
Basidiomycota	Agaricomycetes	Russulales	Russulaceae	Russula	EcM	ITS1_00952	0	0	0	0	0	0	0	0	0	0	0	0	0	0	0	0	0	14	0	0	0	0	0	0	0	9	0	0	0	0	0	0	0	0	0	0	0	0	0	0	0	0	0
Basal lineages2	Fungi_other				NM	ITS1_00954	0	0	0	0	0	0	0	0	0	0	0	0	0	0	0	0	0	0	0	0	0	0	0	0	0	0	0	0	0	0	0	0	0	0	0	0	0	0	0	0	0	0	0
Basidiomycota	Agaricomycetes	Russulales	Russulaceae		EcM	ITS1_00955	0	0	0	0	0	0	0	0	0	0	0	0	0	0	0	0	0	0	0	0	0	0	0	0	0	0	0	0	0	0	0	0	0	0	0	4	0	0	0	0	0	0	0
Ascomycota	Dothideomycetes				NM	ITS1_00956	0	1	0	0	0	0	1	161	1	1	0	0	0	0	0	0	0	0	0	0	0	0	0	0	0	0	0	0	0	0	0	0	0	0	0	0	17	0	0	0	0	0	0
Ascomycota	Dothideomycetes	Pleosporales			NM	ITS1_00957	0	0	0	0	17	13	0	26	0	0	0	0	0	4	0	0	0	0	0	0	0	0	0	0	0	0	0	0	0	1	0	0	1	52	5	0	59	0	0	0	0	0	1
Basidiomycota	Agaricomycetes	Russulales	Russulaceae		EcM	ITS1_00959	0	1	0	124	0	0	0	1	0	0	2	0	0	0	0	0	0	0	0	0	0	0	0	0	0	0	0	0	0	0	0	0	53	0	0	0	0	0	0	0	0	0	0
Ascomycota	Sordariomycetes	Hypocreales	Hypocreaceae	Trichoderma	NM	ITS1_00961	0	0	0	0	0	0	0	0	0	1	0	0	25	0	0	3	109	5	3	1	6	0	1	0	4	17	4	2	0	0	0	0	0	0	0	0	0	0	0	0	0	0	0
Basidiomycota	Agaricomycetes	Thelephorales	Thelephoraceae	Tomentella	EcM	ITS1_00963	0	0	0	1	0	0	171	0	0	1	0	0	0	0	0	0	0	0	0	0	0	0	0	0	0	0	0	0	0	0	0	0	0	0	0	5	0	0	0	0	0	0	0
Basidiomycota	Agaricomycetes	Agaricales	Tricholomataceae	Resupinatus	NM	ITS1_00965	0	0	0	0	0	0	0	0	0	0	0	0	0	0	0	0	0	0	125	0	0	0	0	0	0	0	0	0	0	0	0	0	0	0	0	0	0	0	0	0	0	0	0
Ascomycota	Eurotiomycetes	Eurotiales	Trichocomaceae	Paecilomyces	NM	ITS1_00966	0	2	0	2	0	0	0	0	0	0	0	0	0	0	0	0	5	2	0	0	0	4	0	0	72	81	12	0	0	0	0	0	0	0	0	0	0	0	0	0	0	0	0
Basidiomycota	Agaricomycetes	Russulales	Russulaceae	Russula	EcM	ITS1_00967	0	0	0	0	0	0	0	0	0	0	0	0	0	0	0	0	0	1	1	77	84	0	0	0	0	1	0	0	0	0	0	0	0	0	0	0	0	0	0	0	0	0	0
Basidiomycota	Agaricomycetes	Polyporales	Ganodermataceae	Ganoderma	NM	ITS1_00968	1	2	0	0	0	0	0	0	5	17	13	70	0	4	0	0	0	0	0	0	0	0	0	0	0	0	0	0	0	0	1	1	0	1	0	0	1	0	9	8	39	2	5
Ascomycota	Sordariomycetes	Chaetosphaeriales	Chaetosphaeriaceae	Chaetosphaeria	NM	ITS1_00969	0	2	5	10	0	0	0	0	0	0	0	0	1	0	0	0	63	4	0	0	0	2	5	0	16	47	19	4	0	0	0	0	1	0	0	0	0	0	0	0	0	0	0
Basidiomycota	Agaricomycetes	Agaricales	Mycenaceae	Mycena	NM	ITS1_00971	0	1	0	0	0	0	0	0	1	0	0	0	0	0	0	130	0	0	0	0	0	0	0	0	0	0	0	0	0	1	0	1	0	0	0	0	0	0	0	0	0	0	1
Basidiomycota	Agaricomycetes	Agaricales	Psathyrellaceae	Psathyrella	NM	ITS1_00972	0	0	0	0	0	0	0	0	0	0	0	0	1	0	177	0	0	0	0	0	0	0	0	0	0	0	0	0	0	0	0	0	0	0	0	0	0	0	0	0	0	0	0
Ascomycota	Fungi_other				NM	ITS1_00973	1	0	0	0	0	0	0	155	0	0	0	0	0	0	0	0	0	0	0	0	0	0	0	0	0	0	0	0	0	0	0	0	0	0	0	0	22	0	0	0	0	0	0
Mortierellomycota	Mortierellomycetes	Mortierellales	Mortierellaceae	Mortierella	NM	ITS1_00974	0	0	0	0	0	0	0	0	0	0	0	0	0	0	0	0	0	0	4	0	0	0	0	0	0	0	0	1	29	0	0	0	0	0	0	0	0	0	0	0	0	0	0
Basidiomycota	Agaricomycetes	Russulales	Russulaceae		EcM	ITS1_00977	0	0	0	0	0	0	0	0	0	0	0	0	0	0	0	0	0	29	0	0	0	0	1	0	0	0	0	145	0	0	0	0	0	0	0	0	0	0	0	0	0	0	0
Basidiomycota	Agaricomycetes	Sebacinales	Sebacinaceae	Helvellosebacina	EcM	ITS1_00978	0	0	0	0	0	0	0	0	0	0	0	0	0	0	0	0	1	107	0	0	0	0	2	0	0	0	0	33	0	0	0	0	0	0	0	0	0	0	0	0	0	0	0
Basidiomycota	Agaricomycetes	Thelephorales	Thelephoraceae		EcM	ITS1_00979	0	1	0	0	0	0	0	112	0	0	0	0	0	1	0	0	0	0	0	0	0	0	0	0	0	0	0	0	0	0	0	0	0	0	0	0	61	1	0	0	0	0	0
Basidiomycota	Agaricomycetes	Cantharellales	Cantharellaceae		EcM	ITS1_00980	1	0	0	2	28	43	0	0	0	0	0	0	1	0	1	0	0	0	0	0	1	1	0	1	1	0	0	0	0	0	0	0	0	83	13	0	0	0	0	0	0	0	0
Mortierellomycota	Mortierellomycetes	Mortierellales			NM	ITS1_00981	0	0	0	0	0	0	0	0	0	0	0	0	0	0	0	7	0	1	93	2	0	1	0	1	0	0	0	0	0	0	0	0	0	0	0	0	0	0	0	0	0	0	0
Ascomycota	Dothideomycetes	Hysteriales	Gloniaceae	Cenococcum	EcM	ITS1_00983	0	0	0	2	0	0	0	0	0	0	0	0	0	0	0	0	1	0	0	0	0	0	0	0	0	0	1	0	4	0	0	0	28	0	0	0	0	0	0	0	0	0	0
Basidiomycota	Agaricomycetes	Agaricales	Marasmiaceae	Marasmiellus	NM	ITS1_00984	0	0	0	0	0	0	0	0	0	0	0	1	0	0	99	0	0	0	0	0	0	0	0	0	0	0	0	0	0	0	0	0	0	0	0	0	0	0	0	0	0	0	0
Ascomycota	Sordariomycetes	Hypocreales	Hypocreaceae	Hypocrea	NM	ITS1_00987	0	0	1	1	0	0	0	2	27	6	1	3	50	0	0	2	38	0	0	0	0	5	5	0	2	10	18	5	0	0	0	0	0	0	0	0	0	0	0	0	0	0	0
Basidiomycota	Agaricomycetes	Thelephorales			EcM	ITS1_00988	0	0	0	0	0	0	0	0	0	0	0	0	0	0	0	0	1	0	0	0	0	3	4	144	0	0	0	1	0	0	0	0	0	0	0	0	0	0	0	0	0	0	0
Basidiomycota	Agaricomycetes	Thelephorales	Thelephoraceae		EcM	ITS1_00989	0	0	0	0	0	0	0	122	1	1	1	0	0	1	0	3	0	0	0	0	0	0	0	0	0	0	0	0	0	0	0	0	0	0	0	0	45	0	0	0	0	0	0
Ascomycota	Leotiomycetes	Helotiales			NM	ITS1_00990	0	0	0	0	0	0	0	0	0	0	0	0	0	0	1	117	0	0	14	0	0	0	0	0	0	0	0	0	0	0	0	0	0	0	0	0	0	0	0	0	0	0	0
Basidiomycota	Agaricomycetes	Agaricales	Entolomataceae	Entoloma	EcM	ITS1_00991	1	0	0	0	0	0	0	0	0	0	0	1	87	1	0	0	0	0	0	0	0	0	0	0	0	0	0	0	0	1	0	0	1	0	0	1	0	0	0	0	0	81	1
Basidiomycota	Agaricomycetes	Agaricales	Cortinariaceae	Cortinarius	EcM	ITS1_00992	0	0	0	0	0	0	0	0	0	0	0	0	0	0	0	0	1	0	0	17	1	0	0	0	1	0	0	153	2	0	0	0	0	0	0	0	0	0	0	0	0	0	0
Ascomycota	Eurotiomycetes	Chaetothyriales	Herpotrichiellaceae	Cladophialophora	NM	ITS1_00994	0	0	0	0	0	0	0	0	0	24	18	87	6	0	0	0	0	0	0	0	0	0	0	0	0	0	0	0	0	0	0	0	0	0	0	0	0	0	7	13	16	3	0
Ascomycota	Leotiomycetes	Helotiales	Myxotrichaceae	Oidiodendron	NM	ITS1_00995	0	95	0	0	0	0	0	1	0	0	0	0	0	1	0	0	0	0	0	0	0	0	0	0	0	0	0	0	0	0	76	0	1	0	0	0	0	0	0	0	0	0	0
Basidiomycota	Agaricomycetes	Russulales	Russulaceae	Russula	EcM	ITS1_00998	0	0	0	0	0	0	0	0	0	0	0	0	0	0	0	0	0	0	0	0	0	0	0	0	0	0	0	0	0	0	0	0	1	0	0	0	1	0	0	0	0	171	0
Ascomycota	Eurotiomycetes	Chaetothyriales			NM	ITS1_00999	2	5	1	2	7	1	2	9	3	3	4	20	0	3	4	1	3	0	0	0	0	0	1	0	11	27	9	16	2	1	1	0	2	1	1	2	1	4	1	0	3	0	1
Basidiomycota	Agaricomycetes	Agaricales	Inocybaceae	Inocybe	EcM	ITS1_01000	0	0	0	0	0	0	0	0	0	0	0	0	0	0	0	0	0	113	0	0	1	0	0	0	0	0	0	0	0	0	0	0	0	0	0	0	0	0	0	0	0	0	0
Basidiomycota	Agaricomycetes	Cantharellales	Clavulinaceae	Membranomyces	EcM	ITS1_01001	0	0	0	0	0	0	0	0	0	0	0	0	0	0	0	0	0	102	0	0	0	0	0	0	0	0	0	0	0	0	0	0	0	0	0	0	0	0	0	0	0	0	0
Basidiomycota	Agaricomycetes	Thelephorales	Thelephoraceae		EcM	ITS1_01002	0	0	0	123	0	0	0	0	0	1	0	0	0	1	0	0	0	0	0	0	0	0	0	0	0	0	0	0	0	0	0	0	48	0	0	0	0	0	0	0	0	0	0
Ascomycota	Eurotiomycetes	Chaetothyriales	Herpotrichiellaceae	Rhinocladiella	NM	ITS1_01003	0	0	0	0	0	0	0	0	0	0	0	0	0	0	0	0	0	0	0	0	0	0	0	0	0	0	0	0	105	0	0	0	0	0	0	0	0	0	0	0	0	0	0
Mortierellomycota	Mortierellomycetes	Mortierellales	Mortierellaceae	Mortierella	NM	ITS1_01004	6	22	13	1	0	0	0	0	1	0	0	0	2	0	0	35	30	9	8	0	0	1	3	3	0	1	7	15	12	0	0	0	0	0	0	0	0	0	0	0	0	0	0
Ascomycota	Eurotiomycetes	Chaetothyriales			NM	ITS1_01005	0	0	0	1	1	0	1	17	17	19	0	60	3	3	0	0	0	0	0	0	0	0	0	0	0	0	0	0	0	0	1	0	0	0	0	1	9	26	2	0	9	1	1
Ascomycota	Dothideomycetes	Venturiales	Sympoventuriaceae	Ochroconis	NM	ITS1_01006	4	2	0	0	2	3	14	3	10	0	0	5	0	8	39	0	0	0	0	0	0	0	0	1	5	5	0	0	0	5	0	0	0	6	0	13	0	10	0	0	1	0	6
Basidiomycota	Agaricomycetes	Agaricales	Inocybaceae	Inocybe	EcM	ITS1_01007	0	0	0	0	0	0	0	0	0	0	0	0	0	0	0	0	0	0	0	0	0	0	0	0	0	0	0	0	0	0	0	0	0	1	0	0	171	0	0	0	0	0	0
Basidiomycota	Agaricomycetes	Russulales	Russulaceae	Russula	EcM	ITS1_01008	0	0	0	0	0	0	0	0	0	0	0	0	0	0	0	0	86	17	1	0	0	0	1	0	0	3	0	1	2	0	0	0	0	0	0	0	0	0	0	0	0	0	0
Basidiomycota	Agaricomycetes	Thelephorales	Thelephoraceae		EcM	ITS1_01009	0	0	0	164	0	0	0	0	0	1	0	0	0	1	0	1	0	0	0	0	0	0	0	0	0	0	0	0	0	0	0	0	3	0	0	0	0	0	0	0	0	0	0
Basidiomycota	Agaricomycetes	Thelephorales	Thelephoraceae		EcM	ITS1_01011	0	0	0	0	0	0	0	0	0	0	0	0	0	0	0	0	0	0	0	0	0	0	0	0	0	0	0	0	0	0	0	0	1	0	0	0	0	0	0	0	0	0	0
Ascomycota	Group0835				NM	ITS1_01013	0	120	41	6	0	0	0	0	0	0	0	0	1	0	0	2	0	0	0	0	0	0	0	0	0	0	1	0	0	0	0	0	0	0	0	0	0	0	0	0	0	0	0
Basidiomycota	Agaricomycetes	Sebacinales	Serendipitaceae		NM	ITS1_01014	0	0	0	0	0	0	0	0	0	0	0	0	0	0	0	0	0	0	2	0	0	0	0	0	0	0	0	0	161	0	0	0	0	0	0	0	0	0	0	0	0	0	0
Basidiomycota	Agaricomycetes	Cantharellales	Clavulinaceae	Clavulina	EcM	ITS1_01015	1	1	0	2	15	16	0	131	0	2	0	0	0	1	0	0	0	0	0	0	0	0	0	0	0	0	0	0	0	0	0	0	0	1	0	0	1	0	0	0	0	0	0
Ascomycota	Eurotiomycetes	Eurotiales	Trichocomaceae	Penicillium	NM	ITS1_01016	0	0	0	0	1	0	0	0	0	7	0	0	0	0	0	0	1	0	0	0	0	0	0	0	0	0	0	0	0	0	0	0	0	0	0	15	2	1	52	53	0	0	0
Ascomycota	Leotiomycetes	Leotiales	Leotiaceae	Leotia	NM	ITS1_01017	0	0	0	0	0	0	0	0	0	0	0	0	0	0	0	0	0	0	0	0	0	0	0	0	0	0	0	0	0	0	0	0	0	0	0	0	0	0	0	0	0	0	0
Ascomycota	Leotiomycetes	Helotiales			NM	ITS1_01018	0	0	0	1	0	2	0	0	0	0	0	0	0	0	0	0	20	19	0	1	0	4	22	0	4	5	29	2	0	0	0	0	1	0	0	0	0	0	0	0	0	0	0
Mucoromycota	Mucoromycetes	Mucorales	Cunninghamellaceae	Cunninghamella	NM	ITS1_01019	0	0	0	0	0	0	0	0	0	0	0	0	0	0	0	0	0	0	0	0	0	0	0	0	0	0	0	0	0	0	0	0	0	0	0	155	0	15	0	0	0	0	0
Basidiomycota	Agaricomycetes	Boletales	Boletaceae	Mycoamaranthus	EcM	ITS1_01020	0	0	0	0	0	0	0	2	0	2	0	93	0	0	0	0	0	0	0	0	0	0	0	0	0	0	0	0	0	0	0	0	0	5	0	0	5	0	2	0	61	0	0
Basidiomycota	Agaricomycetes	Cantharellales	Clavulinaceae		EcM	ITS1_01022	0	0	0	0	0	0	0	0	0	0	0	0	0	0	0	0	1	1	0	0	0	0	0	0	0	0	0	1	0	0	0	0	0	0	0	0	0	0	0	0	0	0	0
Basidiomycota	Agaricomycetes	Thelephorales	Thelephoraceae	Tomentella	EcM	ITS1_01023	0	0	0	77	0	0	0	0	0	0	0	0	0	0	0	1	0	12	0	0	0	0	0	6	0	7	0	5	1	0	0	0	19	1	0	0	0	0	0	0	0	0	0
Basidiomycota	Agaricomycetes	Agaricales	Amanitaceae	Amanita	EcM	ITS1_01024	0	0	0	0	0	0	0	0	0	0	0	0	0	0	0	0	0	0	0	160	0	0	0	0	0	0	0	0	0	0	0	0	0	0	0	0	0	0	0	0	0	0	0
Basidiomycota	Agaricomycetes	Sebacinales	Serendipitaceae		NM	ITS1_01026	0	0	0	0	0	0	0	0	0	0	0	0	0	0	0	0	0	0	168	0	0	0	0	0	1	0	0	0	0	0	0	0	0	0	0	0	0	0	0	0	0	0	0
Basidiomycota	Agaricomycetes	Agaricales	Clavariaceae		NM	ITS1_01027	0	0	0	0	0	2	0	0	0	0	0	0	0	0	0	0	1	1	1	0	0	0	2	148	0	0	0	2	1	0	0	0	0	0	0	0	0	0	0	0	0	0	0
Basidiomycota	Agaricomycetes	Sebacinales	Sebacinaceae		EcM	ITS1_01028	0	1	0	1	71	68	1	0	0	0	1	0	1	0	0	0	0	0	1	0	0	0	2	1	0	0	0	2	1	0	0	0	0	12	2	0	0	1	0	0	0	0	0
Ascomycota	Eurotiomycetes	Eurotiales	Trichocomaceae	Penicillium	NM	ITS1_01029	0	0	0	0	0	0	0	0	0	0	0	0	2	0	0	0	4	0	0	1	0	36	0	1	27	1	0	0	0	0	0	0	0	0	0	1	0	0	0	0	0	4	0
Mortierellomycota	Mortierellomycetes	Mortierellales	Mortierellaceae	Mortierella	NM	ITS1_01030	0	0	0	0	0	0	0	0	0	0	0	0	0	0	0	0	0	0	0	0	0	0	0	0	0	0	0	0	0	1	0	0	0	0	0	11	3	0	0	0	0	0	1
Ascomycota	Eurotiomycetes	Eurotiales	Trichocomaceae	Penicillium	NM	ITS1_01031	0	0	0	0	0	0	0	0	0	2	1	0	0	0	0	0	0	0	0	0	0	0	0	0	0	0	3	0	0	0	0	0	0	0	0	0	1	3	145	9	0	0	0
Ascomycota	Sordariomycetes	Magnaporthales	Magnaporthaceae	Mycoleptodiscus	NM	ITS1_01032	0	0	0	1	0	0	6	0	0	0	0	1	0	3	107	0	0	0	0	0	0	0	0	0	0	0	0	0	0	0	0	0	0	18	0	6	0	1	0	0	0	0	0
Basidiomycota	Agaricomycetes	Agaricales	Agaricaceae		NM	ITS1_01034	0	0	0	0	0	0	0	0	0	0	0	0	0	0	0	0	0	0	2	0	0	0	1	0	0	2	138	10	2	0	0	0	0	0	0	0	0	0	0	0	0	0	0
Basidiomycota	Agaricomycetes	Hymenochaetales	Schizoporaceae	Xylodon	NM	ITS1_01035	0	0	0	0	0	0	0	0	0	0	0	0	0	0	0	0	0	0	0	0	0	0	0	0	0	0	0	0	0	0	0	0	0	0	0	0	0	0	0	0	0	0	0
Basidiomycota	Agaricomycetes	Thelephorales	Thelephoraceae		EcM	ITS1_01036	0	0	0	0	0	0	0	0	0	0	0	0	0	0	0	0	0	0	1	0	0	0	0	166	0	0	0	0	0	0	0	0	0	0	0	0	0	0	0	0	0	0	0
Basidiomycota	Agaricomycetes	Trechisporales	Hydnodontaceae	Trechispora	NM	ITS1_01037	0	12	0	10	0	0	3	0	0	0	0	105	0	0	0	0	0	0	0	0	0	0	0	0	0	0	0	0	0	0	9	0	2	0	0	0	0	0	0	0	27	0	0
Ascomycota	Sordariomycetes	Ophiostomatales	Ophiostomataceae	Sporothrix	NM	ITS1_01038	0	0	0	0	0	0	0	0	0	0	0	0	0	0	0	0	138	0	0	5	25	0	0	0	0	0	0	0	0	0	0	0	0	0	0	0	0	0	0	0	0	0	0
Basidiomycota	Agaricomycetes	Russulales	Russulaceae		EcM	ITS1_01039	0	0	0	0	0	0	0	0	117	0	0	1	2	0	0	0	0	0	0	0	0	0	0	0	0	0	0	0	0	0	0	0	0	8	4	0	0	35	0	0	0	0	0
Mortierellomycota	Mortierellomycetes	Mortierellales	Mortierellaceae	Mortierella	NM	ITS1_01042	0	2	0	0	0	0	0	0	1	0	0	0	1	0	0	21	6	5	0	0	0	0	3	33	18	4	3	1	0	0	2	2	4	0	0	0	0	1	0	0	0	1	0
Basidiomycota	Agaricomycetes	Agaricales	Marasmiaceae	Hydropus	NM	ITS1_01043	3	15	3	1	0	0	0	0	17	1	0	5	1	0	0	0	0	0	0	0	0	0	0	0	0	0	0	0	0	1	9	2	0	0	0	0	1	96	1	1	9	0	0
Basidiomycota	Agaricomycetes	Agaricales	Inocybaceae	Inocybe	NM	ITS1_01044	1	3	0	56	0	0	0	0	0	0	0	2	0	0	0	0	0	0	0	0	0	0	0	0	0	0	0	0	0	0	3	2	96	1	0	0	1	0	0	0	0	0	0
Basidiomycota	Agaricomycetes	Boletales	Boletaceae		EcM	ITS1_01045	1	0	0	162	0	0	1	0	0	0	0	0	0	0	0	0	0	0	0	0	0	0	0	0	0	0	0	0	0	0	0	0	0	0	0	0	0	0	0	0	0	0	0
Ascomycota	Sordariomycetes	Xylariales	Xylariaceae	Xylaria	NM	ITS1_01047	1	0	0	0	1	0	0	159	0	1	0	2	1	0	1	0	0	0	0	0	0	0	0	0	0	0	0	0	0	0	0	0	0	0	0	0	0	0	0	0	0	0	0
Basidiomycota	Fungi_other				NM	ITS1_01049	1	96	27	1	0	0	0	0	0	0	0	0	0	0	0	0	0	0	1	0	0	0	0	0	0	0	0	0	0	0	32	7	0	0	0	0	0	0	0	0	0	0	0
Basidiomycota	Agaricomycetes	Cantharellales	Clavulinaceae	Clavulina	EcM	ITS1_01050	0	0	0	0	0	0	0	0	0	0	0	0	0	0	0	0	0	1	0	0	0	1	1	161	0	0	0	0	1	0	0	0	0	0	0	0	0	0	0	0	0	0	0
Basidiomycota	Agaricomycetes	Agaricales	Entolomataceae		NM	ITS1_01051	0	63	21	0	0	0	0	0	0	0	0	0	0	0	0	1	0	0	0	0	0	0	0	0	0	0	0	0	0	0	57	22	0	0	0	0	0	0	0	0	0	0	0
Basidiomycota	Agaricomycetes	Agaricales	Inocybaceae	Inocybe	EcM	ITS1_01052	0	0	1	0	0	0	0	6	0	0	0	0	0	0	0	0	1	5	1	0	3	132	6	1	0	4	0	3	1	0	0	0	0	0	0	0	0	0	0	0	0	0	0
Basidiomycota	Agaricomycetes	Agaricales	Inocybaceae	Inocybe	EcM	ITS1_01053	0	0	0	0	0	1	0	0	0	0	0	0	0	0	0	0	0	0	0	0	0	0	1	102	0	1	0	0	0	0	0	0	0	0	0	0	0	0	0	0	0	0	0
Basidiomycota	Agaricomycetes	Agaricales			NM	ITS1_01054	0	9	1	0	0	0	0	0	0	0	0	1	0	0	0	25	1	118	0	0	0	0	0	0	0	9	0	0	0	0	0	0	0	0	0	0	0	0	0	0	0	0	0
Basidiomycota	Agaricomycetes	Russulales	Russulaceae		EcM	ITS1_01055	0	0	0	0	0	0	0	0	0	0	0	0	0	0	0	0	0	1	0	0	0	0	0	1	0	0	0	110	1	0	0	0	0	0	0	0	0	0	0	0	0	0	0
Basidiomycota	Agaricomycetes	Sebacinales	Sebacinaceae		NM	ITS1_01056	0	0	1	1	58	58	0	0	0	0	0	0	0	1	0	0	0	0	0	0	0	0	4	1	0	1	0	1	0	0	0	0	0	26	11	0	0	0	0	0	0	0	0
Basidiomycota	Agaricomycetes	Trechisporales			NM	ITS1_01059	3	0	0	0	93	20	0	0	0	1	0	0	0	0	1	0	0	0	1	0	0	0	0	0	0	0	0	0	0	2	0	0	0	40	0	0	1	0	0	0	0	0	0
Basidiomycota	Fungi_other				NM	ITS1_01060	0	0	0	0	0	0	0	0	0	0	0	0	0	148	0	0	0	0	0	0	0	0	0	0	0	0	0	0	0	0	0	0	0	0	0	0	1	0	0	0	0	0	14
Basidiomycota	Agaricomycetes	Russulales	Russulaceae	Russula	EcM	ITS1_01061	143	0	0	0	0	0	0	0	0	0	0	0	1	0	0	0	0	0	0	0	0	0	0	0	0	0	0	0	0	18	0	0	0	0	0	1	0	0	0	0	0	0	0
Basidiomycota	Agaricomycetes	Thelephorales	Thelephoraceae	Tomentella	EcM	ITS1_01062	0	0	0	0	0	1	0	0	0	0	0	0	0	0	0	0	0	0	2	0	0	122	3	1	5	0	0	0	0	0	0	0	0	0	0	0	0	0	0	0	0	0	0
Ascomycota	Leotiomycetes	Helotiales			NM	ITS1_01063	0	0	0	0	0	0	0	0	0	0	0	0	0	0	0	44	3	0	115	0	0	0	0	0	0	0	0	0	0	0	0	0	0	0	0	0	0	0	0	0	0	0	0
Ascomycota	Eurotiomycetes	Chaetothyriales	Herpotrichiellaceae	Exophiala	NM	ITS1_01064	0	0	0	0	0	0	0	0	0	0	0	0	157	0	1	1	0	0	2	0	0	0	0	0	0	0	0	0	0	0	0	0	0	0	0	0	0	0	0	0	0	1	0
Ascomycota	Eurotiomycetes	Chaetothyriales	Herpotrichiellaceae		NM	ITS1_01065	0	0	0	0	0	0	0	2	0	0	0	0	0	0	0	0	0	0	0	0	0	0	0	0	0	0	0	0	0	0	0	0	0	0	0	8	149	0	0	0	0	0	2
Basidiomycota	Agaricomycetes	Thelephorales	Thelephoraceae		EcM	ITS1_01070	0	0	0	0	0	0	0	0	0	0	0	0	0	0	0	0	0	0	0	0	0	0	1	0	0	0	0	1	69	0	0	0	0	0	0	0	0	0	0	0	0	0	0
Basidiomycota	Agaricomycetes	Agaricales	Marasmiaceae	Marasmius	NM	ITS1_01072	0	0	2	0	0	0	0	0	0	0	0	0	0	0	0	0	0	1	0	0	0	0	100	1	1	0	0	0	0	0	0	0	0	0	0	0	0	0	0	0	0	0	0
Basidiomycota	Agaricomycetes	Gomphales	Gomphaceae	Ramaria	EcM	ITS1_01073	0	0	0	0	0	0	0	0	0	0	0	0	0	0	0	0	0	3	0	0	0	0	0	0	0	0	0	0	0	0	0	0	0	0	0	0	0	0	0	0	0	0	0
Basidiomycota	Agaricomycetes	Russulales	Russulaceae		EcM	ITS1_01074	0	0	0	0	0	0	0	1	0	0	0	144	1	0	0	1	0	0	0	0	0	0	0	0	0	0	0	0	0	0	0	0	0	0	0	0	0	0	0	1	14	0	0
Ascomycota	Leotiomycetes	Helotiales			NM	ITS1_01075	0	0	0	0	0	0	0	0	0	0	0	0	0	0	0	0	0	0	144	0	0	0	0	0	0	0	0	0	0	0	0	0	0	0	0	0	0	0	0	0	0	0	0
Ascomycota	Fungi_other				NM	ITS1_01076	1	0	0	0	0	0	2	0	0	5	1	139	0	1	1	0	0	0	0	0	0	0	0	0	0	0	0	0	0	0	0	0	0	0	0	0	0	0	5	0	4	0	0
Basidiomycota	Agaricomycetes	Agaricales	Inocybaceae	Inocybe	EcM	ITS1_01077	0	0	0	0	0	0	152	2	0	1	0	0	0	0	4	0	0	0	0	0	0	0	0	0	0	0	0	0	0	0	0	0	0	0	0	2	0	0	0	0	0	0	0
Basidiomycota	Agaricomycetes	Thelephorales	Thelephoraceae		EcM	ITS1_01078	0	0	0	0	0	0	0	0	0	0	0	0	0	0	0	0	0	2	0	0	0	123	0	1	0	0	0	0	1	0	0	0	0	0	0	0	0	0	0	0	0	0	0
Basidiomycota	Agaricomycetes	Thelephorales	Thelephoraceae		EcM	ITS1_01079	0	0	0	1	0	0	125	0	0	1	0	0	0	0	0	0	0	0	0	0	0	0	0	0	0	0	0	0	0	0	0	0	0	0	0	32	0	0	0	0	0	0	0
Ascomycota	Eurotiomycetes	Eurotiales	Trichocomaceae	Talaromyces	NM	ITS1_01080	0	0	0	0	0	0	0	0	0	0	0	0	0	0	0	0	27	0	0	0	0	0	0	0	0	0	0	0	0	0	0	0	0	0	0	0	0	0	0	0	0	0	0
Ascomycota	Pezizomycetes	Pezizales	Pyronemataceae		NM	ITS1_01081	71	0	0	0	4	4	0	0	0	0	0	1	0	0	0	0	0	0	0	0	0	0	1	0	0	0	0	0	0	71	0	0	0	5	0	0	0	0	0	0	0	0	0
Basidiomycota	Agaricomycetes	Agaricales			NM	ITS1_01082	0	0	0	0	0	0	0	0	0	0	0	0	0	0	0	0	0	0	0	0	0	0	0	0	0	0	0	0	0	0	0	0	0	0	0	0	0	0	0	0	0	0	1
Basidiomycota	Agaricomycetes	Boletales	Hygrophoropsidaceae	Leucogyrophana	NM	ITS1_01083	0	0	0	0	0	0	0	0	0	0	0	0	0	0	0	0	0	0	0	0	0	0	0	0	0	0	0	0	98	0	0	0	0	0	0	0	0	0	0	0	0	0	0
Basidiomycota	Agaricomycetes	Russulales	Russulaceae	Russula	EcM	ITS1_01085	0	0	0	0	0	0	0	0	0	0	0	0	0	0	0	0	0	0	0	0	0	0	0	0	0	0	0	0	20	0	0	0	0	0	0	0	0	0	0	0	0	0	0
Ascomycota	Sordariomycetes	Hypocreales	Cordycipitaceae		NM	ITS1_01086	0	0	0	9	1	0	0	0	12	3	5	39	1	0	0	0	0	5	0	3	0	0	0	0	0	3	4	74	0	0	0	0	0	0	0	0	0	0	0	0	0	0	0
Basidiomycota	Agaricomycetes	Agaricales	Hygrophoraceae	Humidicutis	NM	ITS1_01087	0	0	0	0	0	0	0	0	0	0	0	0	0	0	0	0	0	0	0	0	0	0	1	0	0	0	0	158	1	0	0	0	0	0	0	0	0	0	0	0	0	0	0
Basidiomycota	Agaricomycetes	Agaricales	Hygrophoraceae	Hygrocybe	NM	ITS1_01088	1	0	0	0	0	0	126	1	0	1	0	0	0	0	0	0	0	0	0	0	0	0	0	0	0	0	0	0	0	0	0	0	0	0	0	30	0	0	0	0	0	0	0
Basidiomycota	Agaricomycetes	Russulales	Russulaceae	Russula	EcM	ITS1_01090	0	0	0	128	0	0	0	0	0	0	0	0	0	1	0	0	0	0	0	0	0	0	0	0	0	0	0	0	0	0	0	0	29	1	0	0	0	0	0	0	0	0	0
Basidiomycota	Agaricomycetes	Russulales	Russulaceae	Lactarius	EcM	ITS1_01091	0	0	0	0	0	0	0	0	0	0	0	0	0	0	0	0	0	49	1	0	0	0	0	0	0	0	0	0	0	0	0	0	0	0	0	0	0	0	0	0	0	0	0
Mortierellomycota	Mortierellomycetes	Mortierellales			NM	ITS1_01092	0	1	0	0	0	0	0	0	1	0	0	0	0	0	0	18	34	20	6	2	2	1	3	0	0	12	10	7	0	0	0	0	1	0	0	0	0	0	0	0	0	0	0
Ascomycota	Leotiomycetes				NM	ITS1_01093	0	0	0	0	0	0	0	0	0	0	0	0	0	0	0	64	0	0	46	0	0	1	0	0	0	0	1	0	0	0	0	0	0	0	0	0	0	0	0	0	0	0	0
Ascomycota	Dothideomycetes				NM	ITS1_01094	0	0	0	0	36	35	0	86	0	1	0	0	0	0	0	0	0	0	0	0	0	0	0	0	0	0	0	0	0	0	0	0	0	0	0	0	0	0	0	0	0	0	0
Basidiomycota	Agaricomycetes	Russulales	Russulaceae	Russula	EcM	ITS1_01095	0	0	0	0	0	0	0	0	0	0	0	0	0	0	0	0	0	74	0	0	0	0	0	0	0	0	1	0	0	0	0	0	0	0	0	0	0	0	0	0	0	0	0
Ascomycota	Leotiomycetes	Leotiales	Leotiaceae	Leotia	NM	ITS1_01097	0	0	0	0	0	0	0	0	0	0	1	0	0	0	0	0	3	129	1	0	0	0	0	0	0	23	0	0	0	0	0	0	0	0	0	0	0	0	0	0	0	0	0
Ascomycota	Fungi_other				NM	ITS1_01100	3	4	0	0	0	1	19	3	10	3	1	15	4	84	1	0	0	0	0	0	0	0	0	8	0	0	0	0	0	0	0	0	0	0	0	0	0	0	0	0	0	0	0
Basidiomycota	Agaricomycetes	Russulales	Russulaceae	Russula	EcM	ITS1_01102	0	0	0	1	1	0	0	0	0	0	0	1	152	0	2	0	0	0	0	0	0	0	0	0	0	0	0	0	0	0	0	0	0	0	0	0	0	0	0	0	0	0	0
Basidiomycota	Agaricomycetes	Sebacinales	Sebacinaceae		EcM	ITS1_01103	1	1	0	0	73	56	0	0	0	0	0	0	1	0	1	0	0	0	0	0	1	0	3	0	1	0	0	0	0	0	0	0	0	18	1	0	0	0	0	0	0	0	0
Basidiomycota	Agaricomycetes	Sebacinales	Sebacinaceae		NM	ITS1_01104	0	0	0	1	55	27	0	1	0	0	0	0	0	8	0	0	0	0	1	0	0	0	0	0	1	0	0	0	0	0	0	0	0	39	11	0	0	0	0	0	0	0	10
Basidiomycota	Agaricomycetes	Sebacinales	Sebacinaceae		EcM	ITS1_01105	0	0	0	0	0	0	0	0	0	0	0	0	0	0	0	0	0	113	1	0	31	2	1	0	0	0	0	0	0	0	0	0	0	0	0	0	0	0	0	0	0	0	0
Ascomycota	Eurotiomycetes	Chaetothyriales			NM	ITS1_01106	0	0	0	0	0	0	0	0	0	0	0	0	128	0	0	0	3	4	0	0	3	0	0	0	0	0	1	0	0	0	1	0	0	0	0	0	0	0	0	0	0	14	0
Basidiomycota	Agaricomycetes	Agaricales	Tricholomataceae		NM	ITS1_01108	1	0	0	63	0	0	0	0	0	0	0	0	0	0	0	1	0	0	0	0	0	0	0	0	0	0	0	0	0	0	0	0	91	0	0	0	0	0	0	0	0	0	0
Basidiomycota	Agaricomycetes	Thelephorales	Thelephoraceae		EcM	ITS1_01109	0	0	0	0	0	0	0	0	0	0	0	0	0	0	0	0	3	0	0	0	0	6	0	0	0	0	1	107	1	0	0	0	0	0	0	0	0	0	0	0	0	0	0
Basidiomycota	Agaricomycetes	Thelephorales	Thelephoraceae		EcM	ITS1_01110	0	0	0	0	0	0	0	0	0	0	0	0	0	0	0	0	0	117	0	0	0	0	1	0	4	11	1	2	0	0	0	0	0	0	0	0	0	0	0	0	0	0	0
Ascomycota	Eurotiomycetes	Eurotiales	Trichocomaceae	Penicillium	NM	ITS1_01111	0	0	0	0	0	0	0	3	0	0	0	0	0	0	0	0	11	0	0	0	0	0	0	0	0	0	4	0	0	0	0	0	0	0	0	0	1	0	5	5	0	0	0
Basidiomycota	Agaricomycetes	Russulales	Russulaceae	Russula	EcM	ITS1_01112	0	0	0	0	0	0	0	0	0	0	0	0	0	0	0	0	0	0	0	0	0	0	0	0	0	0	0	0	0	0	0	0	1	1	0	0	0	0	23	67	47	16	0
Basidiomycota	Agaricomycetes	Thelephorales	Thelephoraceae		EcM	ITS1_01114	0	0	0	0	0	0	0	0	1	0	0	0	0	0	0	0	0	0	0	0	0	0	1	125	1	0	0	0	0	0	0	0	0	0	0	0	0	0	0	0	0	0	0
Basidiomycota	Agaricomycetes	Agaricales	Cortinariaceae	Cortinarius	EcM	ITS1_01115	0	0	0	0	0	0	0	0	0	0	0	0	0	0	0	0	0	0	0	0	0	0	0	0	0	0	0	0	0	0	0	0	153	0	0	1	0	0	0	0	0	0	0
Basidiomycota	Agaricomycetes	Agaricales	Clavariaceae		NM	ITS1_01116	0	0	0	0	0	0	0	0	0	0	0	0	0	0	0	32	0	0	80	0	0	0	1	0	0	0	1	0	0	0	0	0	0	0	0	0	0	0	0	0	0	0	0
Basidiomycota	Agaricomycetes	Agaricales	Cortinariaceae		EcM	ITS1_01118	0	0	0	0	0	0	0	0	0	0	0	0	0	0	0	0	0	0	0	137	18	0	0	0	0	0	0	0	0	0	0	0	0	0	0	0	0	0	0	0	0	0	0
Basidiomycota	Agaricomycetes	Thelephorales			EcM	ITS1_01119	0	0	0	0	0	0	0	0	0	0	0	0	0	0	0	0	0	0	0	1	0	0	7	0	0	0	0	125	0	0	0	0	0	0	0	0	0	0	0	0	0	0	0
Ascomycota	Eurotiomycetes	Eurotiales	Trichocomaceae	Penicillium	NM	ITS1_01120	0	0	0	0	0	0	0	0	0	74	38	4	1	0	0	0	0	0	0	0	0	0	0	0	0	0	0	0	0	0	0	0	0	0	0	0	0	0	21	16	1	0	0
Basidiomycota	Agaricomycetes	Cantharellales	Ceratobasidiaceae		NM	ITS1_01122	0	63	22	0	0	0	0	0	0	0	0	0	0	0	8	19	2	0	0	0	0	0	0	1	0	0	0	0	0	0	12	14	0	0	0	0	0	5	0	0	0	0	0
Ascomycota	Eurotiomycetes	Eurotiales	Trichocomaceae	Penicillium	NM	ITS1_01123	1	0	0	0	0	0	0	0	0	0	0	0	14	0	0	0	5	0	1	0	0	51	0	0	63	0	0	0	0	0	0	0	0	0	0	1	0	0	0	0	0	1	0
Basidiomycota	Agaricomycetes	Cantharellales	Clavulinaceae		EcM	ITS1_01124	0	0	0	0	0	0	0	0	0	0	0	0	0	0	0	0	0	2	0	0	0	0	0	0	0	9	105	0	1	0	0	0	0	0	0	0	0	0	0	0	0	0	0
Ascomycota	Leotiomycetes				NM	ITS1_01125	0	45	22	1	0	0	0	0	0	0	0	0	0	0	0	1	0	0	0	0	0	0	0	0	0	0	3	0	0	0	42	33	3	0	0	0	0	0	0	0	0	0	0
Basidiomycota	Agaricomycetes	Sebacinales	Sebacinaceae		EcM	ITS1_01126	1	0	0	2	0	0	0	91	0	0	0	0	0	0	0	1	0	0	0	0	0	1	0	0	0	0	0	0	0	0	0	0	1	1	0	0	56	0	0	0	0	0	0
Basidiomycota	Agaricomycetes	Agaricales			EcM	ITS1_01127	1	0	0	2	0	0	0	140	0	1	0	2	0	0	0	0	0	0	0	0	0	0	0	0	0	0	0	0	0	0	0	0	0	0	0	0	8	0	0	0	0	0	0
Ascomycota	Archaeorhizomycetes	Archaeorhizomycetales	Archaeorhizomycetaceae	Archaeorhizomyces	NM	ITS1_01128	0	0	52	0	0	76	0	0	0	0	0	0	0	0	0	0	0	0	0	0	0	0	1	0	0	0	0	0	0	0	0	1	0	0	2	0	0	0	0	0	0	0	0
Ascomycota	Pezizomycetes	Pezizales	Pyronemataceae	Humaria	EcM	ITS1_01129	0	0	0	0	0	0	0	0	0	0	0	0	0	0	0	0	0	0	0	0	0	0	0	91	0	0	0	9	0	0	0	0	0	0	0	0	0	0	0	0	0	0	0
Ascomycota	Eurotiomycetes	Chaetothyriales	Herpotrichiellaceae		NM	ITS1_01130	0	0	0	1	41	38	31	1	0	0	0	0	0	32	0	0	0	0	0	0	0	0	0	0	0	0	0	0	0	0	0	0	0	2	1	2	0	0	0	0	0	0	2
Ascomycota	Sordariomycetes				NM	ITS1_01131	21	69	25	18	1	0	0	0	17	0	0	0	0	0	0	0	1	0	0	0	0	0	0	0	0	0	0	0	0	0	0	1	0	0	0	0	0	0	0	0	0	0	0
Basidiomycota	Agaricomycetes	Thelephorales	Thelephoraceae	Tomentella	EcM	ITS1_01132	0	0	0	0	0	0	0	0	0	0	0	0	0	0	0	0	0	65	0	0	0	0	3	1	0	0	0	32	0	0	0	0	0	0	0	0	0	0	0	0	0	0	0
Basidiomycota	Agaricomycetes	Thelephorales	Thelephoraceae		EcM	ITS1_01133	0	0	0	0	0	0	0	0	2	0	1	0	0	145	0	0	0	0	0	0	0	0	0	0	0	0	0	0	0	0	0	0	0	0	0	0	0	0	0	0	0	0	5
Basidiomycota	Agaricomycetes	Russulales	Russulaceae	Russula	EcM	ITS1_01134	0	0	0	54	0	0	0	0	0	0	0	0	0	0	0	0	1	0	0	0	0	0	0	0	0	0	0	0	0	0	0	0	93	0	0	0	0	0	0	0	0	0	0
Basidiomycota	Agaricomycetes	Russulales	Russulaceae	Russula	EcM	ITS1_01135	0	0	0	0	0	0	0	0	0	0	0	0	0	0	0	0	0	0	0	0	0	0	0	0	0	0	0	113	0	0	0	0	0	0	0	0	0	0	0	0	0	0	0
Basidiomycota	Agaricomycetes	Agaricales	Agaricaceae		NM	ITS1_01136	0	0	0	0	0	0	0	0	0	0	0	0	0	0	0	0	0	0	0	0	0	0	0	0	0	0	0	0	0	0	0	0	0	0	0	0	0	0	0	0	0	0	0
Basidiomycota	Agaricomycetes	Agaricales	Tricholomataceae	Delicatula	NM	ITS1_01138	4	3	3	0	9	12	1	0	0	0	0	0	0	8	2	0	0	0	0	0	1	2	3	2	0	9	0	12	0	9	1	0	0	21	11	0	0	11	0	0	0	0	9
Basidiomycota	Agaricomycetes	Russulales	Russulaceae	Russula	EcM	ITS1_01139	0	0	0	0	0	0	0	0	0	0	0	0	0	0	0	0	81	35	0	0	0	0	0	0	0	0	0	0	0	0	0	1	0	0	0	0	0	0	0	0	0	0	0
Ascomycota	Eurotiomycetes	Chaetothyriales	Herpotrichiellaceae		NM	ITS1_01143	0	0	0	0	0	0	0	0	0	0	0	0	0	0	0	0	0	0	0	0	0	0	0	0	0	0	0	0	0	0	6	3	0	0	0	0	0	0	0	0	0	0	0
Basidiomycota	Agaricomycetes	Agaricales	Cortinariaceae	Cortinarius	EcM	ITS1_01144	0	0	0	0	0	0	0	0	0	0	0	0	0	0	0	0	0	0	0	113	30	0	0	0	0	0	0	0	0	0	0	0	0	0	0	0	0	0	0	0	0	0	0
Basidiomycota	Agaricomycetes	Cantharellales	Clavulinaceae	Clavulina	EcM	ITS1_01145	0	0	0	0	0	0	0	0	0	0	0	0	0	0	0	0	0	0	0	1	0	0	0	149	0	0	0	1	0	0	0	0	0	0	0	0	0	0	0	0	0	0	0
Basidiomycota	Agaricomycetes	Agaricales	Inocybaceae	Inocybe	EcM	ITS1_01146	0	0	0	0	0	0	0	0	0	0	0	144	0	1	0	0	0	0	0	0	0	0	0	0	0	0	0	0	0	0	0	0	0	0	0	0	0	0	0	0	6	0	0
Basidiomycota	Agaricomycetes	Auriculariales			NM	ITS1_01149	0	0	0	0	0	0	0	0	0	0	0	0	0	0	0	0	0	1	1	0	0	46	99	3	0	0	0	0	0	0	0	0	0	0	0	0	0	0	0	0	0	0	0
Basidiomycota	Agaricomycetes	Agaricales	Inocybaceae	Inocybe	EcM	ITS1_01150	0	0	0	0	0	0	0	4	0	0	0	0	0	0	0	0	0	0	0	0	0	0	0	0	0	0	0	0	0	0	0	0	0	0	0	0	144	0	0	0	0	0	0
Ascomycota	Sordariomycetes	Hypocreales	Hypocreaceae	Trichoderma	NM	ITS1_01151	0	0	0	0	23	3	0	16	4	18	0	4	2	22	29	0	4	0	0	0	0	1	0	3	6	11	4	0	0	0	0	0	0	0	0	0	0	0	0	0	0	0	0
Basidiomycota	Agaricomycetes	Sebacinales			NM	ITS1_01152	0	0	0	0	0	1	0	0	0	0	0	0	0	0	0	0	0	0	1	0	0	50	49	22	1	0	0	0	0	0	0	0	0	0	0	0	0	0	0	0	0	0	0
Ascomycota	Eurotiomycetes	Chaetothyriales	Herpotrichiellaceae		NM	ITS1_01153	0	1	2	0	0	0	0	0	0	0	0	0	0	0	0	0	0	0	1	0	0	0	0	0	0	0	0	0	0	0	82	44	5	5	0	0	1	0	0	0	0	0	2
Basidiomycota	Agaricomycetes	Sebacinales	Sebacinaceae		EcM	ITS1_01154	0	0	0	0	0	0	0	0	0	0	0	0	0	1	0	0	0	0	0	0	0	3	68	1	0	0	0	35	0	0	0	0	0	0	0	0	0	0	0	0	0	0	0
Basidiomycota	Agaricomycetes	Agaricales	Entolomataceae		NM	ITS1_01155	0	35	59	0	0	0	0	0	0	0	0	0	0	0	0	0	0	0	0	0	0	0	0	0	0	0	0	0	0	0	22	32	0	0	0	0	0	0	0	0	0	0	0
Basidiomycota	Agaricomycetes	Agaricales	Inocybaceae	Inocybe	EcM	ITS1_01157	0	0	0	0	0	0	0	0	0	0	0	0	0	0	0	0	0	0	0	0	0	3	145	1	0	0	0	0	0	0	0	0	0	0	0	0	0	0	0	0	0	0	0
Basidiomycota	Agaricomycetes	Agaricales	Entolomataceae	Clitopilus	NM	ITS1_01158	1	0	0	0	0	0	59	10	0	1	0	0	0	0	0	0	0	0	0	0	0	0	0	0	0	0	0	0	0	0	0	0	0	0	0	64	8	0	0	0	0	0	0
Chytridiomycota	Chytridiomycetes				NM	ITS1_01159	0	0	0	0	2	0	46	1	10	0	0	0	0	4	4	0	0	0	0	0	0	0	0	1	0	0	0	0	0	0	0	0	0	0	0	53	0	24	0	0	0	0	0
Basidiomycota	Agaricomycetes				NM	ITS1_01160	27	9	10	2	14	19	0	1	12	0	0	0	0	1	0	3	0	0	0	0	0	0	1	2	0	0	0	0	0	21	2	2	0	15	4	0	0	0	0	0	0	0	3
Basidiomycota	Agaricomycetes	Thelephorales	Thelephoraceae		EcM	ITS1_01161	0	0	0	1	0	0	0	0	12	0	0	0	0	112	0	0	0	0	0	0	0	0	0	0	0	0	0	0	0	0	0	0	0	0	0	0	0	8	0	0	0	0	16
Ascomycota	Eurotiomycetes	Eurotiales	Trichocomaceae	Penicillium	NM	ITS1_01162	14	0	0	0	17	4	8	6	0	60	34	0	0	4	1	0	0	0	0	0	0	0	0	0	0	0	0	0	0	0	0	0	0	0	0	0	0	0	1	0	0	0	0
Basidiomycota	Agaricomycetes	Sebacinales	Sebacinaceae	Sebacina	EcM	ITS1_01163	0	0	0	0	0	0	0	0	0	0	0	0	0	0	0	0	0	2	0	0	0	14	123	0	1	0	0	1	7	0	0	0	0	0	0	0	0	0	0	0	0	0	0
Ascomycota	Archaeorhizomycetes	Archaeorhizomycetales	Archaeorhizomycetaceae	Archaeorhizomyces	NM	ITS1_01164	0	0	0	1	0	0	129	0	0	0	0	1	0	0	0	0	0	0	0	0	0	0	0	0	0	0	0	0	0	0	0	0	0	0	0	15	0	0	0	0	0	0	0
Ascomycota	Eurotiomycetes	Chaetothyriales	Herpotrichiellaceae		NM	ITS1_01166	0	0	0	0	0	0	0	0	0	0	0	0	0	0	0	147	0	0	0	0	0	0	0	0	0	0	0	1	0	0	0	0	0	0	0	0	0	0	0	0	0	0	0
Basidiomycota	Agaricomycetes	Agaricales	Entolomataceae	Clitopilus	NM	ITS1_01167	7	0	0	25	0	0	0	0	0	0	0	0	0	0	0	0	0	0	0	0	0	0	0	0	100	5	1	10	0	0	0	0	0	0	0	0	0	0	0	0	0	0	0
Basidiomycota	Agaricomycetes	Thelephorales	Thelephoraceae	Tomentella	EcM	ITS1_01168	0	0	0	0	0	0	0	0	0	0	0	0	0	0	147	0	0	0	0	0	0	0	0	0	0	0	0	0	0	0	0	0	0	0	0	0	0	0	0	0	0	0	0
Ascomycota	Fungi_other				NM	ITS1_01169	0	0	1	0	0	0	0	0	0	0	0	0	0	0	0	23	3	23	0	11	17	3	0	0	0	5	7	54	0	0	0	0	0	0	0	0	0	0	0	0	0	0	0
Basidiomycota	Agaricomycetes	Agaricales	Hygrophoraceae	Hygrocybe	NM	ITS1_01171	0	74	21	0	0	0	0	0	0	0	0	0	0	0	0	1	0	1	1	0	0	0	0	0	0	0	0	0	0	0	27	22	0	0	0	0	0	0	0	0	0	0	0
Ascomycota	Leotiomycetes	Helotiales			NM	ITS1_01172	0	0	0	0	0	0	0	0	0	0	0	0	0	0	0	0	0	0	147	0	0	0	0	0	0	0	0	0	0	0	0	0	0	0	0	0	0	0	0	0	0	0	0
Ascomycota	Archaeorhizomycetes	Archaeorhizomycetales	Archaeorhizomycetaceae	Archaeorhizomyces	NM	ITS1_01174	0	0	0	0	0	0	0	0	0	0	0	0	0	0	127	1	0	0	0	0	0	0	0	0	0	0	0	0	0	0	0	0	0	0	0	0	0	0	0	0	0	0	0
Ascomycota	Sordariomycetes				NM	ITS1_01175	18	91	33	5	0	0	0	0	0	0	0	0	0	0	0	0	0	0	0	0	0	0	0	0	0	0	0	0	0	0	0	0	0	0	0	0	0	0	0	0	0	0	0
Basidiomycota	Agaricomycetes	Agaricales	Cortinariaceae	Cortinarius	EcM	ITS1_01176	0	0	0	0	0	0	0	0	0	0	0	0	0	0	0	0	0	0	0	0	0	0	1	0	7	0	0	133	3	0	0	0	0	0	0	0	0	0	0	0	0	0	0
Basidiomycota	Agaricomycetes	Russulales	Russulaceae	Lactifluus	EcM	ITS1_01177	0	0	0	0	0	0	0	0	0	0	0	0	0	0	0	0	0	0	0	0	0	0	0	0	0	0	0	0	0	0	0	0	0	0	0	0	0	0	0	0	0	0	0
Basidiomycota	Fungi_other				NM	ITS1_01178	1	82	30	0	0	0	0	0	0	0	0	1	1	0	1	0	0	0	0	0	0	0	0	0	0	0	0	0	0	0	20	10	0	0	0	0	0	0	0	0	0	0	0
Basidiomycota	Agaricomycetes	Auriculariales			NM	ITS1_01180	0	0	0	0	0	0	0	0	0	0	0	0	0	0	0	0	2	1	44	0	0	33	1	0	1	0	0	0	0	0	0	0	0	0	0	0	0	0	0	0	0	0	0
Basidiomycota	Agaricomycetes	Agaricales	Inocybaceae	Inocybe	EcM	ITS1_01181	0	0	0	0	0	0	0	0	0	0	0	0	0	0	0	0	0	0	0	0	0	0	0	0	0	0	0	1	81	0	0	0	0	0	0	0	0	0	0	0	0	0	0
Basidiomycota	Agaricomycetes	Russulales	Russulaceae	Russula	EcM	ITS1_01182	0	0	0	0	0	0	0	0	0	0	0	0	0	0	0	0	0	0	0	0	0	0	0	0	0	0	0	0	0	0	0	0	120	24	1	0	1	0	0	0	0	0	0
Basidiomycota	Agaricomycetes	Agaricales	Inocybaceae	Inocybe	EcM	ITS1_01183	0	0	0	0	0	0	0	0	0	0	0	0	0	0	0	0	0	0	0	0	0	0	0	0	0	0	1	74	1	0	0	0	0	0	0	0	0	0	0	0	0	0	0
Basidiomycota	Agaricomycetes	Cantharellales	Hydnaceae	Sistotrema	NM	ITS1_01184	0	71	27	0	0	0	0	0	0	0	0	0	0	0	0	0	0	0	0	0	0	0	0	0	0	0	0	0	0	0	32	15	0	0	0	0	0	0	0	0	0	0	0
Basidiomycota	Agaricomycetes	Atheliales	Atheliaceae	Piloderma	EcM	ITS1_01185	0	0	0	64	0	0	0	0	0	0	0	0	0	1	0	0	0	0	0	0	0	0	0	0	0	0	0	0	0	1	0	0	78	0	0	0	1	0	0	0	0	0	0
Basidiomycota	Agaricomycetes	Thelephorales	Thelephoraceae	Tomentella	EcM	ITS1_01186	0	0	0	107	0	0	0	0	1	0	0	0	0	0	0	0	0	1	0	0	0	0	0	1	0	2	2	22	1	0	0	0	1	0	0	0	0	0	0	0	0	0	0
Basidiomycota	Agaricomycetes	Agaricales	Psathyrellaceae		NM	ITS1_01188	0	0	0	0	0	0	0	1	52	0	0	0	0	0	1	0	0	0	0	0	0	0	0	0	0	0	0	0	0	2	0	0	0	0	0	0	0	86	0	0	1	0	0
Basidiomycota	Agaricomycetes	Agaricales	Inocybaceae	Inocybe	EcM	ITS1_01189	0	0	0	0	0	0	0	0	0	0	0	0	0	0	0	0	0	0	0	112	16	0	0	0	0	0	0	2	0	0	0	0	0	0	0	0	0	0	0	0	0	0	0
Chytridiomycota	Chytridiomycetes				NM	ITS1_01190	3	18	3	6	0	0	0	0	0	0	0	0	62	1	1	7	7	7	11	0	0	0	0	1	0	0	1	2	0	0	1	1	0	0	0	0	0	0	0	0	0	8	0
Ascomycota	Group0835				NM	ITS1_01192	0	0	0	0	0	0	0	0	0	0	0	0	0	0	0	0	0	0	143	0	0	0	0	1	0	0	0	0	0	0	0	0	0	0	0	0	0	0	0	0	0	0	0
Basidiomycota	Agaricomycetes	Cantharellales	Clavulinaceae		EcM	ITS1_01193	0	1	0	1	0	0	52	1	21	0	0	0	0	1	0	0	0	0	0	0	0	0	0	0	0	0	0	0	0	0	0	0	0	0	0	42	0	22	0	0	0	0	1
Ascomycota	Eurotiomycetes	Chaetothyriales	Herpotrichiellaceae	Cladophialophora	NM	ITS1_01194	59	12	0	0	0	0	0	0	0	1	0	14	1	0	0	0	0	0	0	0	0	0	0	0	0	0	0	0	0	49	2	3	0	0	0	0	0	0	0	1	0	0	0
Ascomycota	Eurotiomycetes	Eurotiales	Trichocomaceae	Penicillium	NM	ITS1_01195	0	0	0	0	0	0	0	0	4	31	21	0	0	0	0	0	0	0	0	0	0	0	0	0	0	0	0	0	0	0	0	0	0	0	0	0	1	2	52	32	0	0	0
Basidiomycota	Agaricomycetes	Russulales	Russulaceae	Russula	EcM	ITS1_01197	0	0	0	0	0	0	0	0	0	0	0	1	142	0	0	0	0	0	0	0	0	0	0	0	0	0	0	0	0	0	0	0	0	0	0	0	0	0	0	0	0	0	0
Basidiomycota	Agaricomycetes	Russulales	Russulaceae	Russula	EcM	ITS1_01198	0	0	0	0	0	0	0	0	0	0	0	0	0	0	0	0	0	1	0	58	60	0	0	0	0	0	1	0	1	0	0	0	0	0	0	0	0	0	0	0	0	0	0
Ascomycota	Eurotiomycetes	Eurotiales	Trichocomaceae	Penicillium	NM	ITS1_01199	0	0	0	0	0	0	0	0	0	0	0	0	0	0	0	0	30	1	0	0	0	9	0	0	4	2	27	0	0	0	0	0	0	0	0	0	0	0	0	0	0	0	0
Basidiomycota	Agaricomycetes	Auriculariales			NM	ITS1_01200	0	0	0	0	0	0	0	0	0	0	0	0	0	0	0	0	0	0	0	0	2	0	2	0	0	0	0	0	0	0	0	0	0	0	0	0	0	0	0	0	0	0	0
Ascomycota	Dothideomycetes	Venturiales			NM	ITS1_01201	0	73	43	24	0	0	0	1	0	0	0	0	0	0	0	0	0	1	0	0	0	0	0	0	0	0	0	0	0	0	0	0	0	0	0	0	0	0	0	0	0	0	0
Basidiomycota	Agaricomycetes	Russulales	Russulaceae	Lactarius	EcM	ITS1_01202	0	0	0	141	0	0	0	0	0	0	0	0	0	0	0	0	0	0	0	0	0	0	0	0	0	0	0	0	0	0	0	0	1	0	0	0	0	0	0	0	0	0	0
Basidiomycota	Agaricomycetes	Cantharellales	Clavulinaceae	Clavulina	EcM	ITS1_01203	0	0	0	0	0	0	0	0	0	0	0	0	0	0	0	0	0	0	0	0	0	0	2	1	112	0	0	1	0	0	0	0	0	0	0	0	0	0	0	0	0	0	0
Basidiomycota	Agaricomycetes	Agaricales	Hygrophoraceae	Humidicutis	NM	ITS1_01204	0	0	0	0	0	0	0	0	0	0	0	0	113	0	0	1	0	0	0	0	0	0	0	0	0	0	0	0	0	0	0	0	0	0	0	1	0	0	0	0	0	26	0
Basidiomycota	Fungi_other				NM	ITS1_01206	0	0	0	0	0	0	9	0	0	0	0	0	0	5	63	0	0	0	0	0	0	0	0	0	0	0	0	0	0	0	0	0	0	1	0	13	0	0	0	0	0	0	17
Ascomycota	Eurotiomycetes	Eurotiales	Elaphomycetaceae	Elaphomyces	EcM	ITS1_01208	0	0	0	0	0	0	0	0	0	0	0	0	0	0	0	0	0	0	0	67	0	0	0	0	0	0	0	0	0	0	0	0	0	0	0	0	0	0	0	0	0	0	0
Basidiomycota	Agaricomycetes	Thelephorales	Thelephoraceae		EcM	ITS1_01209	0	0	0	0	0	0	0	0	0	0	0	0	0	0	0	0	0	0	0	0	0	0	0	1	0	0	0	0	129	0	0	0	0	0	0	0	0	0	0	0	0	0	0
Ascomycota	Leotiomycetes	Helotiales			NM	ITS1_01210	0	0	0	0	0	0	0	0	0	0	0	0	0	0	0	0	0	0	66	0	0	0	0	0	0	27	0	0	0	0	0	0	0	0	0	0	0	0	0	0	0	0	0
Ascomycota	Sordariomycetes	Xylariales	Xylariaceae	Lopadostoma	NM	ITS1_01212	0	0	0	0	0	0	0	0	0	0	0	0	0	0	0	0	0	6	1	36	67	0	0	0	0	0	1	0	0	0	0	0	0	0	0	0	0	0	0	0	0	0	0
Basidiomycota	Agaricomycetes	Boletales			EcM	ITS1_01215	0	0	0	0	0	0	0	0	0	1	6	51	1	1	1	0	0	0	0	0	0	0	0	0	0	0	0	0	0	1	0	0	0	0	0	0	1	0	4	1	69	3	0
Basidiomycota	Agaricomycetes	Russulales	Russulaceae	Russula	EcM	ITS1_01216	0	0	0	122	11	5	0	0	0	0	0	0	0	0	0	0	0	0	0	0	0	0	0	0	0	0	0	0	0	0	0	0	1	0	0	0	0	0	0	0	0	0	0
Ascomycota	Sordariomycetes	Hypocreales	Hypocreaceae		NM	ITS1_01217	0	0	0	0	0	0	0	0	0	0	0	0	0	0	0	0	0	0	0	0	0	1	0	0	1	3	132	3	0	0	0	0	0	0	0	0	0	0	0	0	0	0	0
Basidiomycota	Agaricomycetes	Trechisporales			NM	ITS1_01218	0	0	0	0	0	0	0	0	0	0	0	0	0	0	0	0	0	1	0	0	0	0	0	0	0	0	0	0	98	0	0	0	0	0	0	0	0	0	0	0	0	0	0
Basidiomycota	Agaricomycetes	Boletales	Sclerodermataceae	Scleroderma	EcM	ITS1_01219	0	0	0	0	0	0	0	0	0	0	0	0	0	0	0	0	0	0	0	0	0	0	0	0	0	0	0	0	0	0	0	0	0	0	0	18	0	4	0	0	0	0	117
Ascomycota	Sordariomycetes	Chaetosphaeriales	Chaetosphaeriaceae	Chaetosphaeria	NM	ITS1_01220	11	2	0	5	2	4	0	0	9	7	3	5	3	0	0	0	26	1	1	0	0	3	3	2	14	15	14	9	0	0	0	0	0	0	0	0	0	0	0	0	0	0	0
Mortierellomycota	Mortierellomycetes	Mortierellales	Mortierellaceae	Mortierella	NM	ITS1_01221	0	0	0	0	1	0	0	0	0	0	0	0	0	2	99	1	0	0	0	0	0	0	0	0	0	0	0	0	0	0	0	0	0	0	0	0	0	0	0	0	0	0	0
Basidiomycota	Agaricomycetes	Agaricales	Porotheleaceae		NM	ITS1_01222	0	0	0	0	1	0	0	0	0	0	0	0	0	1	136	0	0	0	0	0	0	0	0	0	0	0	0	0	0	0	0	0	0	0	0	0	0	0	0	0	0	0	0
Basidiomycota	Agaricomycetes	Thelephorales	Thelephoraceae		EcM	ITS1_01223	0	0	0	0	0	0	0	0	0	0	0	0	0	0	0	0	7	7	1	24	75	1	0	1	1	9	2	2	0	0	0	0	0	0	0	0	0	0	0	0	0	0	0
Basidiomycota	Agaricomycetes	Thelephorales	Thelephoraceae		EcM	ITS1_01224	0	1	0	0	0	0	0	89	0	1	0	0	0	0	1	0	0	0	0	0	0	0	0	0	0	0	0	0	0	0	0	0	0	0	0	0	45	0	0	0	0	0	0
Basidiomycota	Agaricomycetes	Thelephorales	Thelephoraceae	Tomentella	EcM	ITS1_01225	0	0	0	2	0	0	0	0	0	1	0	0	0	0	0	0	6	50	0	0	0	0	0	0	0	6	0	58	1	0	0	0	2	0	0	0	0	0	0	0	0	0	0
Basidiomycota	Agaricomycetes	Russulales	Russulaceae	Russula	EcM	ITS1_01226	0	0	0	0	0	0	0	0	0	0	0	0	0	0	0	0	0	1	1	0	1	0	1	41	0	46	0	3	1	0	0	0	0	0	0	0	0	0	0	0	0	0	0
Ascomycota	Eurotiomycetes	Chaetothyriales	Herpotrichiellaceae		NM	ITS1_01227	0	0	0	0	0	0	0	0	0	0	0	0	0	0	0	0	0	0	0	136	0	0	0	0	0	0	0	0	0	0	0	0	0	0	0	0	0	0	0	0	0	0	0
Ascomycota	Eurotiomycetes	Eurotiales	Trichocomaceae	Penicillium	NM	ITS1_01228	0	0	0	0	0	0	0	0	0	63	74	0	0	0	0	0	0	0	0	0	0	0	0	0	0	0	1	0	0	0	0	0	0	0	0	0	0	0	0	0	0	0	0
Ascomycota	Eurotiomycetes	Eurotiales	Trichocomaceae	Penicillium	NM	ITS1_01229	0	0	0	0	0	0	0	0	0	0	0	0	3	0	0	0	0	0	0	0	0	56	0	0	0	0	0	0	0	0	0	0	0	0	0	0	0	0	0	0	0	3	0
Mortierellomycota	Mortierellomycetes	Mortierellales	Mortierellaceae		NM	ITS1_01230	0	0	0	0	0	0	0	0	0	0	0	0	4	0	0	4	13	33	0	10	14	0	0	0	0	0	1	0	0	0	0	0	0	0	0	0	0	0	0	0	0	2	0
Basidiomycota	Agaricomycetes	Russulales	Russulaceae	Russula	EcM	ITS1_01232	0	0	0	0	74	45	0	17	0	0	0	0	1	0	0	0	0	0	0	0	0	0	1	0	0	0	0	0	0	0	0	0	0	0	0	0	0	0	0	0	0	0	0
Ascomycota	Sordariomycetes	Xylariales	Amphisphaeriaceae		NM	ITS1_01233	0	0	0	0	0	0	0	0	0	0	0	0	0	0	0	0	1	0	13	0	0	1	0	0	1	0	3	2	117	0	0	0	0	0	0	0	0	0	0	0	0	0	0
Ascomycota	Leotiomycetes	Helotiales	Dermateaceae		NM	ITS1_01234	0	0	0	0	0	0	0	0	0	0	0	0	0	0	0	0	2	4	0	1	1	0	3	0	0	0	2	3	1	0	0	0	1	0	0	0	0	0	0	0	0	1	0
Basidiomycota	Agaricomycetes	Agaricales	Tricholomataceae	Delicatula	NM	ITS1_01236	0	0	0	0	0	0	0	1	0	0	0	6	0	0	0	0	0	0	0	0	0	0	0	0	0	0	0	0	0	0	0	0	4	18	5	0	2	0	1	0	91	1	3
Basidiomycota	Agaricomycetes	Agaricales	Tricholomataceae	Arthromyces	NM	ITS1_01237	0	0	0	0	0	0	0	0	0	0	0	0	0	0	0	0	0	0	0	0	1	0	2	95	0	0	0	0	0	0	0	0	0	0	0	0	0	0	0	0	0	0	0
Basidiomycota	Agaricomycetes	Russulales	Russulaceae	Russula	EcM	ITS1_01238	0	0	0	3	0	0	0	0	0	0	0	0	0	0	0	0	0	0	0	0	0	0	0	0	0	0	0	0	0	0	0	0	134	0	0	0	0	0	0	0	0	0	0
Basidiomycota	Agaricomycetes	Thelephorales	Thelephoraceae	Tomentella	EcM	ITS1_01239	0	0	0	0	0	0	0	0	0	0	0	0	0	0	0	0	0	72	0	0	0	2	0	0	0	13	1	33	0	0	0	0	0	0	0	0	0	0	0	0	0	0	0
Basidiomycota	Agaricomycetes	Sebacinales			NM	ITS1_01240	0	0	0	1	0	0	0	0	0	0	0	0	0	0	0	0	0	0	125	0	0	0	0	0	0	0	0	0	0	0	0	0	0	0	0	0	0	0	0	0	0	0	0
Basidiomycota	Agaricomycetes	Cantharellales	Clavulinaceae		EcM	ITS1_01241	0	0	0	0	19	24	0	29	0	0	0	1	0	0	1	1	0	0	0	0	0	0	0	0	0	0	0	0	0	0	0	0	0	23	8	0	28	0	0	0	0	0	0
Basidiomycota	Agaricomycetes	Sebacinales	Sebacinaceae	Sebacina	EcM	ITS1_01242	0	0	0	0	0	0	0	0	0	0	0	0	0	0	0	0	0	0	0	0	0	10	1	0	0	0	0	125	0	0	0	0	0	0	0	0	0	0	0	0	0	0	0
Basidiomycota	Agaricomycetes	Thelephorales	Thelephoraceae		EcM	ITS1_01243	0	0	0	0	0	0	4	0	0	0	0	0	0	0	0	0	0	0	0	0	0	2	1	84	0	3	0	1	0	0	0	0	0	0	0	0	0	0	0	0	0	0	0
Basidiomycota	Agaricomycetes	Cantharellales	Clavulinaceae		EcM	ITS1_01244	0	0	0	0	0	0	0	0	0	0	0	0	0	0	0	0	0	1	0	58	42	0	0	0	1	0	0	0	0	0	0	0	0	0	0	0	0	0	0	0	0	0	0
Basal lineages2	Fungi_other				NM	ITS1_01245	0	0	0	0	0	0	0	0	0	0	0	0	0	0	0	0	0	0	0	0	0	0	0	0	0	0	0	0	0	0	0	0	0	0	0	0	0	0	0	0	0	0	0
Basidiomycota	Agaricomycetes	Russulales	Russulaceae	Russula	EcM	ITS1_01246	0	0	0	1	0	0	0	49	0	0	0	0	0	0	0	0	0	0	0	0	0	0	0	0	0	0	0	0	0	0	0	0	3	4	0	0	76	0	0	0	0	0	0
Basidiomycota	Agaricomycetes	Russulales	Russulaceae	Russula	EcM	ITS1_01247	0	0	0	0	2	2	0	0	0	0	0	0	0	0	0	0	0	0	0	0	0	0	0	0	0	0	0	0	0	0	0	0	119	12	1	0	0	0	0	0	0	0	0
Basidiomycota	Tremellomycetes				NM	ITS1_01248	3	7	2	5	3	1	0	0	0	3	1	0	6	0	0	1	20	2	0	2	1	1	2	1	13	16	24	7	1	0	1	0	1	1	0	0	3	0	0	0	0	1	0
Basidiomycota	Agaricomycetes				NM	ITS1_01249	0	0	0	0	0	0	0	0	0	0	0	0	0	0	0	0	0	0	0	0	0	0	0	0	0	0	0	0	0	0	0	0	0	0	0	0	0	0	0	0	0	0	0
Basidiomycota	Agaricomycetes	Russulales	Russulaceae	Lactarius	EcM	ITS1_01250	0	0	0	0	0	0	0	0	0	0	0	0	0	0	0	0	111	5	0	0	0	0	0	0	0	8	0	0	0	0	0	0	0	0	0	0	0	0	0	0	0	0	0
Basidiomycota	Agaricomycetes	Thelephorales	Thelephoraceae		EcM	ITS1_01251	0	0	0	0	0	0	0	0	0	0	0	0	0	0	0	0	1	0	0	0	0	1	122	0	0	0	0	0	0	0	0	0	0	0	0	0	0	0	0	0	0	0	0
Basidiomycota	Agaricomycetes	Cantharellales	Clavulinaceae	Clavulina	EcM	ITS1_01252	0	0	0	0	0	0	0	0	0	0	0	0	0	0	0	0	1	0	0	0	0	9	0	0	0	4	107	2	2	0	0	0	0	0	0	0	0	0	0	0	0	0	0
Basidiomycota	Agaricomycetes	Sebacinales	Sebacinaceae	Sebacina	EcM	ITS1_01253	0	0	0	0	0	0	0	1	0	1	0	0	0	0	0	0	0	0	0	0	0	0	0	0	0	0	0	0	0	0	0	0	0	0	0	0	133	0	0	0	0	0	0
Basidiomycota	Agaricomycetes	Atheliales	Atheliaceae	Byssocorticium	EcM	ITS1_01254	0	0	0	0	0	0	0	0	0	0	0	0	0	0	0	0	0	109	0	0	0	0	0	0	0	0	2	0	0	0	0	0	0	0	0	0	0	0	0	0	0	0	0
Basidiomycota	Agaricomycetes	Geastrales	Geastraceae	Geastrum	NM	ITS1_01255	0	0	0	0	0	0	0	0	0	0	0	0	0	0	0	0	0	0	0	0	0	0	0	1	0	0	0	0	0	0	1	0	0	0	0	0	0	0	1	0	0	0	0
Basidiomycota	Agaricomycetes	Agaricales	Cortinariaceae		EcM	ITS1_01256	0	0	0	0	0	0	0	0	0	0	0	0	0	0	0	0	0	1	0	0	0	0	0	1	0	0	52	5	0	0	0	0	0	0	0	0	0	0	0	0	0	0	0
Ascomycota	Dothideomycetes				NM	ITS1_01257	0	95	37	3	0	0	0	0	0	0	0	0	0	0	0	0	0	0	0	0	0	0	0	0	0	0	0	0	0	0	0	0	0	0	0	0	0	0	0	0	0	0	0
Ascomycota	Eurotiomycetes	Chaetothyriales	Herpotrichiellaceae		NM	ITS1_01258	0	31	16	1	0	0	0	1	0	0	0	0	0	0	0	5	0	0	0	2	0	0	1	0	5	3	0	2	0	0	40	14	3	3	0	0	0	0	0	0	0	0	0
Basidiomycota	Agaricomycetes	Sebacinales	Sebacinaceae		EcM	ITS1_01259	1	1	0	1	0	0	0	98	0	1	0	1	0	0	0	0	0	0	0	0	0	0	0	0	0	0	0	0	0	0	0	0	0	1	0	0	30	0	0	0	0	0	0
Basidiomycota	Wallemiomycetes	Geminibasidiales	Geminibasidiaceae	Geminibasidium	NM	ITS1_01260	1	0	0	1	2	1	1	16	0	1	0	3	0	0	0	0	5	1	0	0	0	0	0	0	0	0	9	92	1	0	0	0	0	0	0	0	0	0	0	0	0	0	0
Basidiomycota	Agaricomycetes	Russulales	Russulaceae	Russula	EcM	ITS1_01261	0	0	0	0	0	0	0	0	0	0	0	0	0	0	0	0	16	33	0	0	0	0	0	0	0	27	0	0	0	0	0	0	0	0	0	0	0	0	0	0	0	0	0
Basal lineages2	Fungi_other				NM	ITS1_01262	0	27	25	4	0	0	0	0	0	0	0	0	0	0	0	0	0	0	0	0	0	0	0	0	0	0	0	0	0	0	46	31	1	0	0	0	0	0	0	0	0	0	0
Ascomycota	Dothideomycetes	Pleosporales			NM	ITS1_01263	1	0	0	0	0	0	0	1	0	3	0	1	1	51	0	2	0	0	0	0	0	1	0	0	2	0	0	0	1	0	0	0	1	0	0	0	0	0	3	0	0	0	62
Ascomycota	Sordariomycetes	Sordariales			EcM	ITS1_01264	0	0	0	1	3	2	0	125	0	0	0	0	0	1	0	1	0	0	0	0	0	0	0	0	0	0	0	0	0	0	0	0	0	0	0	0	0	0	0	0	0	0	0
Basidiomycota	Agaricomycetes	Agaricales	Clavariaceae		NM	ITS1_01265	0	0	0	0	0	0	0	0	0	0	0	0	0	0	0	0	0	0	98	0	0	0	0	0	0	0	0	0	1	0	0	0	0	0	0	0	0	0	0	0	0	0	0
Basidiomycota	Agaricomycetes	Agaricales	Entolomataceae	Clitopilus	NM	ITS1_01266	0	0	0	0	0	0	0	0	0	0	0	0	0	0	0	0	0	0	0	0	0	0	0	0	0	0	0	0	0	3	0	0	34	0	0	0	0	0	0	0	0	0	0
Basidiomycota	Agaricomycetes	Agaricales	Marasmiaceae	Marasmius	NM	ITS1_01267	0	0	0	0	0	0	0	0	0	0	0	1	0	0	0	15	0	67	0	0	0	0	0	0	0	0	0	0	0	0	0	0	0	0	0	0	0	0	0	0	0	0	0
Basidiomycota	Agaricomycetes	Sebacinales	Serendipitaceae		NM	ITS1_01268	0	0	0	0	0	0	0	0	0	0	0	0	0	0	0	0	0	0	0	0	0	0	0	0	0	0	0	1	58	0	0	0	0	0	0	0	0	0	0	0	0	0	0
Ascomycota	Sordariomycetes				NM	ITS1_01269	0	0	0	2	1	0	0	0	0	0	0	0	0	0	0	0	3	7	1	76	0	1	2	0	0	11	2	19	0	0	0	0	0	0	0	0	0	0	0	0	0	0	0
Basidiomycota	Agaricomycetes	Thelephorales	Thelephoraceae	Tomentella	EcM	ITS1_01270	0	0	0	10	0	0	0	0	0	0	0	0	0	0	0	1	1	115	0	0	1	0	0	0	0	3	1	2	0	0	0	0	0	0	0	0	0	0	0	0	0	0	0
Ascomycota	Fungi_other				NM	ITS1_01271	0	0	0	1	28	22	0	41	0	0	0	0	0	0	0	0	0	0	0	0	0	0	0	0	0	0	0	0	0	0	0	0	0	8	3	0	31	0	0	0	0	0	0
Basidiomycota	Agaricomycetes	Thelephorales	Thelephoraceae		EcM	ITS1_01273	0	0	0	0	0	0	0	0	0	0	0	0	0	0	0	0	0	0	0	0	0	0	0	0	0	0	1	0	117	0	0	0	0	0	0	0	0	0	0	0	0	0	0
Basidiomycota	Agaricomycetes	Thelephorales	Thelephoraceae	Tomentella	EcM	ITS1_01274	0	0	0	0	0	0	0	0	0	0	0	0	0	0	0	0	1	0	0	0	0	0	0	95	0	0	0	2	0	0	0	0	0	0	0	0	0	0	0	0	0	0	0
Basidiomycota	Agaricomycetes	Agaricales	Clavariaceae		NM	ITS1_01276	0	0	0	0	0	0	0	0	0	0	0	0	0	0	2	119	0	0	2	0	0	0	0	0	0	0	0	0	0	0	0	0	0	0	0	0	0	0	0	0	0	0	0
Basidiomycota	Agaricomycetes	Cantharellales	Clavulinaceae	Clavulina	EcM	ITS1_01277	0	1	0	1	0	0	0	78	0	0	0	0	0	0	0	0	0	0	0	0	0	0	0	0	0	0	0	0	0	0	0	0	0	0	0	0	52	0	0	0	0	0	0
Basidiomycota	Agaricomycetes	Sebacinales	Sebacinaceae		EcM	ITS1_01280	0	0	0	0	54	42	0	0	0	0	0	0	0	0	0	0	0	3	0	0	0	0	0	0	0	0	0	0	1	0	0	0	0	23	9	0	0	0	0	0	0	0	0
Basidiomycota	Agaricomycetes	Cantharellales	Cantharellaceae	Pseudocraterellus	EcM	ITS1_01281	0	0	0	0	0	0	0	0	0	0	0	0	0	0	0	0	0	0	1	0	0	0	0	0	0	0	0	72	0	0	0	0	0	0	0	0	0	0	0	0	0	0	0
Basidiomycota	Agaricomycetes	Agaricales	Marasmiaceae	Clitocybula	NM	ITS1_01282	0	0	0	2	1	0	0	0	0	0	0	57	0	0	0	0	0	0	0	0	0	0	0	0	0	0	0	0	0	0	0	0	1	0	0	0	0	0	0	0	69	0	0
Basidiomycota	Agaricomycetes	Agaricales	Inocybaceae	Inocybe	EcM	ITS1_01283	0	1	0	1	60	46	0	1	0	2	1	0	0	0	1	0	1	1	0	1	1	0	1	3	0	0	0	1	0	0	0	0	0	8	2	0	0	0	0	0	0	0	0
Basidiomycota	Agaricomycetes	Trechisporales			NM	ITS1_01284	0	59	34	0	0	0	0	0	0	0	0	0	0	0	0	0	0	0	0	0	0	0	0	0	0	0	0	0	0	0	33	6	0	0	0	0	0	0	0	0	0	0	0
Ascomycota	Eurotiomycetes	Chaetothyriales			NM	ITS1_01285	0	0	0	1	19	5	5	0	0	0	0	0	0	0	0	6	1	1	0	1	0	10	23	6	21	5	10	5	0	0	0	0	0	2	1	1	0	0	0	0	0	0	0
Ascomycota	Eurotiomycetes	Chaetothyriales			NM	ITS1_01286	0	16	3	0	0	0	0	0	0	0	0	0	0	0	0	2	7	0	1	1	0	0	0	1	11	9	1	0	0	0	41	5	0	0	0	0	0	0	0	0	0	0	0
Basidiomycota	Fungi_other				NM	ITS1_01287	0	0	0	0	0	0	0	0	0	0	0	0	0	0	0	0	0	1	113	0	0	0	0	1	0	0	0	0	1	0	0	0	0	0	0	0	0	0	0	0	0	0	0
Basidiomycota	Agaricomycetes	Cantharellales	Cantharellaceae	Craterellus	EcM	ITS1_01290	0	0	0	0	0	0	0	0	0	0	0	0	0	0	0	0	0	0	0	12	42	0	0	0	0	0	17	0	0	0	0	0	0	0	0	0	0	0	0	0	0	0	0
Basidiomycota	Agaricomycetes	Agaricales	Inocybaceae	Inocybe	EcM	ITS1_01291	0	0	0	0	0	0	0	0	0	0	0	0	0	0	0	0	0	0	0	0	0	0	0	0	0	0	0	0	0	0	0	0	131	0	0	0	0	0	0	0	0	0	0
Basidiomycota	Agaricomycetes	Agaricales	Tricholomataceae		NM	ITS1_01292	0	0	0	0	0	0	0	0	0	0	0	0	0	0	0	0	0	0	0	81	12	0	0	0	0	0	0	0	0	0	0	0	0	0	0	0	0	0	0	0	0	0	0
Basidiomycota	Agaricomycetes	Agaricales			EcM	ITS1_01293	0	0	0	0	0	0	0	0	0	0	0	0	0	0	0	0	0	2	0	1	0	19	27	1	19	0	0	62	0	0	0	0	0	0	0	0	0	0	0	0	0	0	0
Basidiomycota	Agaricomycetes	Agaricales	Cortinariaceae	Cortinarius	EcM	ITS1_01294	0	0	0	0	0	0	0	0	0	0	0	0	0	0	0	0	0	1	0	0	0	0	1	0	0	0	0	129	0	0	0	0	0	0	0	0	0	0	0	0	0	0	0
Basidiomycota	Agaricomycetes	Russulales	Russulaceae	Lactarius	EcM	ITS1_01295	0	0	0	0	0	0	0	0	0	0	0	0	0	0	0	0	0	66	0	0	0	0	2	0	1	3	0	0	0	0	0	0	0	0	0	0	0	0	0	0	0	0	0
Basidiomycota	Agaricomycetes	Sebacinales	Serendipitaceae		NM	ITS1_01296	0	0	0	0	0	0	0	0	0	0	0	0	0	0	0	0	0	1	0	0	0	66	25	0	0	0	1	0	0	0	0	0	0	0	0	0	0	0	0	0	0	0	0
Basidiomycota	Agaricomycetes	Russulales	Russulaceae	Russula	EcM	ITS1_01297	1	0	0	78	0	0	0	0	0	0	0	0	0	0	0	0	0	0	0	0	0	0	0	0	0	0	0	0	0	0	0	0	52	0	0	0	0	0	0	0	0	0	0
Mortierellomycota	Mortierellomycetes	Mortierellales			NM	ITS1_01298	0	0	0	0	0	0	0	0	0	0	0	0	0	0	9	0	0	0	0	0	0	0	0	0	0	0	0	0	0	0	0	0	0	0	0	0	0	0	0	0	0	0	0
Ascomycota	Eurotiomycetes	Chaetothyriales			NM	ITS1_01299	0	0	0	0	0	0	0	0	0	0	0	0	0	0	0	0	0	0	122	0	0	1	0	0	0	0	1	1	0	0	0	0	0	0	0	0	0	0	0	0	0	0	0
Basidiomycota	Agaricomycetes	Russulales	Russulaceae	Russula	EcM	ITS1_01301	0	0	0	83	0	0	0	0	0	0	0	0	0	0	0	0	0	0	0	0	0	0	0	0	0	0	0	0	0	0	0	0	47	0	0	0	0	0	0	0	0	0	0
Basidiomycota	Agaricomycetes	Agaricales	Physalacriaceae	Armillaria	NM	ITS1_01302	0	0	0	0	0	0	0	0	0	0	0	0	0	0	0	4	2	2	0	0	2	0	0	0	0	45	4	0	0	0	0	0	0	0	0	0	0	0	0	0	0	0	0
Ascomycota	Sordariomycetes	Sordariales		Ascotaiwania	NM	ITS1_01303	0	0	0	0	0	0	0	0	0	0	0	0	0	0	0	120	0	0	3	0	0	2	0	0	0	0	3	0	0	0	0	0	0	0	0	0	0	0	0	0	0	0	0
Basidiomycota	Agaricomycetes				NM	ITS1_01305	47	0	0	0	0	0	0	1	0	0	0	0	17	0	1	0	0	0	0	0	0	0	0	0	0	0	0	0	0	46	0	0	0	0	0	1	0	0	0	0	0	17	0
Basidiomycota	Agaricomycetes	Sebacinales			NM	ITS1_01306	0	0	0	0	0	0	0	0	0	0	0	0	0	0	0	0	0	0	0	0	0	0	0	0	0	0	0	1	0	0	0	0	0	0	0	0	0	0	0	0	0	0	0
Basidiomycota	Agaricomycetes	Hymenochaetales	Repetobasidiaceae	Rickenella	NM	ITS1_01307	0	0	0	0	81	43	0	0	0	1	1	1	0	0	0	0	0	0	0	0	0	0	0	0	2	0	0	0	1	0	0	0	0	0	0	0	0	0	0	0	0	0	0
Basidiomycota	Agaricomycetes	Sebacinales			NM	ITS1_01308	0	0	0	0	0	0	0	0	0	0	0	0	0	0	0	0	0	0	125	0	0	1	2	0	1	0	0	0	1	0	0	0	0	0	0	0	0	0	0	0	0	0	0
Basidiomycota	Agaricomycetes	Thelephorales	Thelephoraceae	Tomentella	EcM	ITS1_01309	0	0	0	22	0	0	0	0	0	0	0	0	0	0	0	0	1	1	0	0	0	0	0	0	0	13	1	29	0	0	0	0	37	0	0	0	0	0	0	0	0	0	0
Basidiomycota	Agaricomycetes	Cantharellales	Clavulinaceae		EcM	ITS1_01310	0	0	0	0	0	0	0	0	0	0	0	0	0	0	0	0	1	0	0	0	0	0	2	0	0	0	1	83	0	0	0	0	0	0	0	0	0	0	0	0	0	0	0
Ascomycota	Dothideomycetes				NM	ITS1_01311	0	0	0	18	0	0	0	0	0	2	0	21	0	0	0	0	0	0	0	0	0	0	0	0	0	0	0	4	0	0	0	0	17	0	0	0	0	0	9	1	47	3	0
Ascomycota	Archaeorhizomycetes	Archaeorhizomycetales	Archaeorhizomycetaceae		NM	ITS1_01312	0	0	0	0	0	0	0	0	0	0	0	0	0	0	0	1	0	0	0	0	0	0	0	0	0	0	0	56	0	0	0	0	0	0	0	0	0	0	0	0	0	0	0
Ascomycota	Eurotiomycetes	Eurotiales	Trichocomaceae	Penicillium	NM	ITS1_01313	0	0	0	0	0	0	0	0	0	0	0	0	1	0	0	0	1	0	0	0	0	0	0	0	0	0	2	0	0	0	0	0	0	0	0	0	0	0	0	0	0	25	0
Basidiomycota	Agaricomycetes	Agaricales	Cortinariaceae	Cortinarius	EcM	ITS1_01315	0	0	0	0	0	0	0	0	0	0	0	0	0	0	0	0	0	0	1	1	115	0	0	0	10	0	1	1	0	0	0	0	0	0	0	0	0	0	0	0	0	0	0
Basidiomycota	Agaricomycetes	Russulales	Russulaceae	Russula	EcM	ITS1_01316	0	0	0	0	0	0	0	0	0	0	0	0	0	0	0	0	0	0	0	0	0	0	0	0	0	0	0	0	0	0	0	0	128	0	0	0	1	0	0	0	0	0	0
Ascomycota	Sordariomycetes	Hypocreales	Hypocreaceae	Trichoderma	NM	ITS1_01317	0	0	0	0	0	0	0	1	0	33	0	0	0	0	0	1	0	0	0	0	0	1	1	0	3	84	4	0	1	0	0	0	0	0	0	0	0	0	0	0	0	0	0
Ascomycota	Sordariomycetes	Hypocreales	Hypocreaceae		NM	ITS1_01318	1	0	0	0	0	0	29	1	13	0	0	0	0	1	84	0	0	0	0	0	0	0	0	0	0	0	0	0	0	0	0	0	0	0	0	0	0	0	0	0	0	0	0
Basidiomycota	Agaricomycetes	Agaricales	Hygrophoraceae	Hygrocybe	NM	ITS1_01320	0	0	0	0	0	0	0	0	0	0	0	0	100	0	0	2	0	0	0	0	0	0	0	0	0	0	0	0	0	0	1	0	0	0	0	0	2	0	0	0	0	22	0
Basidiomycota	Agaricomycetes	Russulales	Russulaceae		EcM	ITS1_01321	0	0	0	0	0	0	0	0	0	0	0	0	0	0	0	0	0	0	0	0	0	0	0	0	0	0	0	0	0	0	0	0	0	0	0	0	0	0	0	0	0	0	0
Basidiomycota	Fungi_other				NM	ITS1_01324	0	0	0	0	0	0	0	0	0	0	22	32	0	0	0	0	0	0	0	0	0	0	0	0	0	0	0	0	0	0	0	0	2	0	0	0	0	0	0	28	44	0	0
Basidiomycota	Agaricomycetes	Agaricales	Entolomataceae	Entoloma	NM	ITS1_01325	0	50	13	0	2	2	0	0	0	0	0	0	0	0	0	13	0	0	1	0	0	0	2	0	0	0	2	0	0	0	22	8	0	3	2	0	0	0	0	0	0	0	1
Basidiomycota	Agaricomycetes	Agaricales	Agaricaceae	Leucoagaricus	NM	ITS1_01326	2	0	0	0	0	0	0	0	0	0	0	0	0	0	0	0	0	0	0	0	0	0	1	0	0	0	0	67	0	2	1	0	0	0	0	0	0	0	0	0	0	0	0
Basidiomycota	Agaricomycetes	Agaricales			NM	ITS1_01327	0	0	0	3	27	9	0	0	0	0	0	21	0	0	0	0	0	0	0	0	0	0	0	2	0	0	0	0	0	0	0	0	0	38	6	0	1	0	1	0	17	0	0
Basidiomycota	Agaricomycetes	Agaricales	Agaricaceae	Lycoperdon	NM	ITS1_01328	7	8	0	3	0	0	2	1	10	0	0	0	0	0	0	0	0	0	1	0	0	0	4	4	4	40	21	14	2	0	0	0	0	0	0	0	0	0	0	0	0	0	0
Basidiomycota	Agaricomycetes	Agaricales	Cortinariaceae	Cortinarius	EcM	ITS1_01329	0	0	0	0	0	0	0	0	0	0	0	0	0	0	0	0	0	1	0	0	0	0	121	0	0	0	0	6	0	0	0	0	0	0	0	0	0	0	0	0	0	0	0
Basidiomycota	Agaricomycetes				NM	ITS1_01331	0	0	0	0	0	0	0	0	0	0	0	82	0	0	0	0	0	0	0	0	0	0	0	0	0	0	0	0	0	0	0	0	0	1	0	0	1	0	0	0	44	0	0
Basidiomycota	Agaricomycetes	Russulales	Russulaceae	Lactifluus	EcM	ITS1_01332	0	0	0	0	41	21	0	0	0	0	0	0	0	0	0	0	0	0	0	0	0	1	0	0	0	0	0	0	0	0	0	0	0	56	9	0	0	0	0	0	0	0	0
Basidiomycota	Agaricomycetes	Russulales	Russulaceae	Russula	EcM	ITS1_01333	0	0	0	0	0	0	0	0	0	0	0	0	0	0	0	0	1	0	0	1	0	0	2	3	22	76	2	2	6	0	0	0	0	0	0	0	0	0	0	0	0	0	0
Ascomycota	Dothideomycetes				NM	ITS1_01334	0	0	0	1	1	0	0	98	0	0	0	0	1	1	0	0	0	0	0	0	0	0	0	0	0	0	0	0	0	0	0	0	0	0	0	0	26	0	0	0	0	0	0
Basidiomycota	Agaricomycetes	Thelephorales	Thelephoraceae	Tomentella	EcM	ITS1_01335	0	0	0	0	0	0	0	0	0	0	0	0	0	0	0	0	1	4	1	0	0	0	116	1	3	0	2	0	0	0	0	0	0	0	0	0	0	0	0	0	0	0	0
Ascomycota	Eurotiomycetes	Eurotiales	Trichocomaceae	Penicillium	NM	ITS1_01336	0	0	0	0	5	5	0	1	8	0	0	0	0	4	0	0	0	0	0	0	0	0	0	0	0	0	0	0	0	15	0	0	2	2	0	1	3	76	3	0	0	0	0
Basidiomycota	Agaricomycetes	Russulales	Russulaceae	Russula	EcM	ITS1_01338	0	0	0	0	0	0	0	0	0	0	0	0	0	0	0	0	0	0	0	0	0	0	0	0	0	0	0	0	109	0	0	0	0	0	0	0	0	0	0	0	0	0	0
Ascomycota	Sordariomycetes				NM	ITS1_01339	0	0	0	0	0	0	0	0	3	0	0	0	0	47	43	0	0	0	0	0	0	0	0	0	0	0	0	0	0	0	0	0	0	0	0	1	0	2	0	0	0	0	15
Ascomycota	Eurotiomycetes	Eurotiales	Trichocomaceae	Penicillium	NM	ITS1_01341	0	0	0	0	0	0	0	0	5	0	0	0	0	0	0	0	0	0	0	0	0	0	0	0	0	0	0	0	0	0	0	0	0	0	0	0	0	79	43	0	0	0	0
Ascomycota	Eurotiomycetes	Eurotiales	Trichocomaceae	Penicillium	NM	ITS1_01343	0	0	0	0	0	0	9	3	21	6	6	0	0	1	0	0	25	0	1	0	0	8	0	0	0	0	0	1	0	0	0	0	0	0	0	0	0	0	0	0	0	0	0
Basidiomycota	Agaricomycetes	Agaricales	Inocybaceae	Inocybe	EcM	ITS1_01344	0	0	0	0	0	0	0	0	0	0	0	0	0	0	0	0	0	16	0	0	0	0	0	0	0	0	0	0	0	0	0	1	0	0	0	0	0	0	0	0	0	0	0
Basidiomycota	Agaricomycetes	Agaricales	Inocybaceae	Inocybe	EcM	ITS1_01345	1	0	0	125	0	0	0	0	0	0	0	0	0	0	0	0	0	0	0	0	0	0	0	0	0	0	0	0	0	0	0	0	0	0	0	0	0	0	0	0	0	0	0
Basidiomycota	Agaricomycetes	Agaricales	Cortinariaceae	Cortinarius	EcM	ITS1_01346	0	0	0	0	0	0	0	0	0	0	0	0	0	0	0	0	0	0	0	0	12	0	0	0	1	0	0	0	0	0	0	0	0	0	0	1	0	0	0	0	0	0	0
Basidiomycota	Agaricomycetes	Agaricales			NM	ITS1_01347	0	0	0	0	0	0	0	0	0	0	0	0	0	0	0	0	0	2	0	0	1	0	0	87	0	0	0	0	0	0	0	0	0	0	0	0	0	0	0	0	0	0	0
Basidiomycota	Agaricomycetes	Cantharellales	Clavulinaceae	Clavulina	EcM	ITS1_01348	0	0	0	0	0	0	0	0	0	0	0	0	0	0	0	0	0	0	1	0	0	1	123	0	1	0	0	0	0	0	0	0	0	0	0	0	0	0	0	0	0	0	0
Basidiomycota	Agaricomycetes	Thelephorales	Thelephoraceae		EcM	ITS1_01349	0	0	0	0	0	0	0	0	0	0	0	0	0	0	0	0	0	0	0	0	0	0	0	74	3	0	1	0	1	0	0	0	0	0	0	0	0	0	0	0	0	0	0
Ascomycota	Eurotiomycetes	Chaetothyriales	Herpotrichiellaceae	Cladophialophora	NM	ITS1_01350	0	0	0	0	0	0	0	0	0	0	0	0	0	0	0	0	33	15	1	0	0	2	2	5	0	4	29	5	3	0	0	0	0	0	0	0	0	0	0	0	0	0	0
Ascomycota	Lecanoromycetes	Acarosporales	Acarosporaceae	Acarospora	NM	ITS1_01351	0	0	0	0	0	1	0	0	0	0	0	0	0	0	0	0	0	0	0	0	0	42	14	56	0	1	0	0	0	0	0	0	0	0	0	0	0	0	0	0	0	0	0
Ascomycota	Eurotiomycetes	Chaetothyriales	Herpotrichiellaceae		NM	ITS1_01352	0	5	2	12	0	1	0	0	0	0	0	0	1	0	0	0	0	0	0	0	0	0	0	0	0	0	0	0	0	0	54	17	33	0	0	0	1	0	0	0	0	0	0
Basidiomycota	Agaricomycetes	Agaricales	Cortinariaceae	Cortinarius	EcM	ITS1_01354	0	0	0	0	0	0	0	0	0	0	0	0	0	0	0	0	0	0	0	90	36	0	0	0	0	0	0	0	0	0	0	0	0	0	0	0	0	0	0	0	0	0	0
Basidiomycota	Agaricomycetes	Russulales	Russulaceae	Lactarius	EcM	ITS1_01355	0	0	0	31	0	0	0	0	0	0	0	0	0	0	0	0	0	2	0	0	0	0	0	0	0	13	1	0	0	0	3	0	61	1	0	0	0	0	0	0	0	0	0
Basidiomycota	Fungi_other				NM	ITS1_01356	0	0	0	0	0	0	0	0	0	0	0	0	1	0	0	118	5	2	0	0	0	0	0	0	0	0	0	0	0	0	0	0	0	0	0	0	0	0	0	0	0	0	0
Ascomycota	Eurotiomycetes	Eurotiales			NM	ITS1_01358	0	0	0	0	0	0	0	0	0	0	0	0	123	0	0	1	0	0	0	0	0	0	0	0	0	0	0	0	0	0	0	0	0	0	0	0	0	0	0	0	0	1	0
Ascomycota	Sordariomycetes	Xylariales	Amphisphaeriaceae	Pestalotiopsis	NM	ITS1_01359	5	3	1	0	3	1	1	1	11	8	2	1	0	22	2	0	17	1	0	0	0	30	0	0	2	6	4	3	0	0	0	0	0	0	0	0	0	0	0	0	0	0	0
Basidiomycota	Agaricomycetes	Cantharellales	Cantharellaceae		EcM	ITS1_01360	0	0	0	0	0	0	0	0	0	0	0	0	0	0	0	0	0	0	0	0	0	73	48	0	0	0	2	0	1	0	0	0	0	0	0	0	0	0	0	0	0	0	0
Basidiomycota	Agaricomycetes	Agaricales	Agaricaceae	Cystolepiota	NM	ITS1_01361	124	0	0	0	0	0	0	0	0	0	0	0	0	0	1	0	0	0	0	0	0	0	0	0	0	0	0	0	0	0	0	0	0	0	0	0	0	0	0	0	0	0	0
Basidiomycota	Agaricomycetes	Russulales	Russulaceae		EcM	ITS1_01362	0	0	0	2	0	0	66	0	14	0	0	0	0	0	0	0	0	0	0	0	0	0	0	0	0	0	0	0	0	0	0	0	0	1	0	29	0	12	0	0	0	0	0
Basidiomycota	Agaricomycetes	Russulales	Russulaceae	Russula	EcM	ITS1_01363	0	0	0	1	0	0	0	0	0	0	0	0	110	0	0	0	0	13	0	0	0	0	0	0	0	0	0	0	1	0	0	0	0	0	0	0	0	0	0	0	0	0	0
Basidiomycota	Agaricomycetes	Russulales	Russulaceae	Russula	EcM	ITS1_01364	0	0	0	23	0	0	0	0	0	0	1	0	1	0	0	0	1	0	1	0	0	0	0	0	0	44	51	2	1	0	0	0	0	0	0	0	0	0	0	0	0	0	0
Ascomycota	Leotiomycetes	Helotiales		Cadophora	EcM	ITS1_01365	0	0	0	0	0	0	0	0	0	0	0	0	0	0	0	0	0	0	0	0	0	0	0	0	0	0	0	0	24	0	0	0	0	0	0	0	0	0	0	0	0	0	0
Basidiomycota	Agaricomycetes	Thelephorales	Thelephoraceae		EcM	ITS1_01368	0	0	0	0	0	0	0	0	2	0	0	0	0	56	0	0	0	0	0	0	0	0	0	0	0	0	0	0	0	0	0	0	0	0	0	0	0	1	0	0	0	0	65
Basidiomycota	Agaricomycetes	Sebacinales			NM	ITS1_01369	0	0	0	0	0	0	0	0	0	0	0	0	0	0	0	0	0	0	54	0	0	1	59	0	0	0	0	0	0	0	0	0	0	0	0	0	0	0	0	0	0	0	0
Ascomycota	Eurotiomycetes	Eurotiales	Trichocomaceae	Paecilomyces	NM	ITS1_01370	3	0	0	0	1	1	27	2	52	5	1	0	0	1	1	0	23	0	0	0	0	7	0	0	0	0	0	0	0	0	0	0	0	0	0	0	0	0	0	0	0	0	0
Basidiomycota	Agaricomycetes	Russulales	Russulaceae	Lactarius	EcM	ITS1_01371	0	0	0	0	0	0	0	0	0	0	0	0	74	0	0	1	0	0	0	0	0	0	0	0	0	0	0	0	0	0	0	0	0	0	0	0	0	0	0	0	0	48	0
Basidiomycota	Agaricomycetes	Agaricales	Marasmiaceae	Clitocybula	NM	ITS1_01372	0	0	0	0	0	0	0	1	0	0	0	0	0	48	0	0	0	0	0	0	0	0	0	0	0	0	0	0	0	0	0	0	0	0	0	0	0	0	0	0	0	0	74
Ascomycota	Archaeorhizomycetes	Archaeorhizomycetales	Archaeorhizomycetaceae	Archaeorhizomyces	NM	ITS1_01373	90	0	0	0	0	0	0	0	0	0	0	0	0	0	0	0	0	0	0	0	0	0	0	0	0	0	0	0	0	33	0	0	0	0	0	0	0	0	0	0	0	0	0
Basidiomycota	Agaricomycetes	Agaricales	Hydnangiaceae	Laccaria	EcM	ITS1_01374	0	0	0	0	0	0	0	0	0	0	0	0	0	0	0	0	0	1	0	0	0	0	0	66	0	0	0	1	0	0	0	0	0	0	0	0	0	0	0	0	0	0	0
Basidiomycota	Agaricomycetes	Agaricales	Cortinariaceae	Cortinarius	EcM	ITS1_01375	0	0	0	0	0	0	0	0	0	0	0	0	0	0	0	0	0	0	0	0	123	0	0	0	0	0	0	0	0	0	0	0	0	0	0	0	0	0	0	0	0	0	0
Basidiomycota	Agaricomycetes	Russulales	Russulaceae	Russula	EcM	ITS1_01376	0	0	0	0	0	0	0	0	0	0	0	0	0	0	0	0	0	0	0	0	0	0	0	0	0	0	1	0	116	0	0	0	0	0	0	0	0	0	0	0	0	0	0
Basidiomycota	Agaricomycetes	Thelephorales	Thelephoraceae	Tomentella	EcM	ITS1_01377	0	0	0	0	0	0	0	0	0	0	0	0	0	0	0	0	2	23	0	0	0	0	0	0	1	23	3	57	1	0	0	0	4	0	0	0	0	0	0	0	0	0	0
Basidiomycota	Agaricomycetes	Agaricales	Inocybaceae	Inocybe	EcM	ITS1_01378	1	0	0	0	53	60	0	0	0	0	0	0	0	0	0	0	0	0	0	0	0	0	2	0	0	0	0	1	0	0	0	0	0	5	1	0	0	0	0	0	0	0	0
Basidiomycota	Agaricomycetes	Thelephorales	Thelephoraceae		EcM	ITS1_01379	0	0	1	0	0	0	0	0	0	0	0	0	0	0	0	0	0	1	0	0	0	40	36	0	8	0	0	1	0	0	0	0	0	0	0	0	0	0	0	0	0	0	0
Basidiomycota	Agaricomycetes	Trechisporales	Hydnodontaceae	Trechispora	NM	ITS1_01380	0	0	0	0	1	0	0	0	0	0	2	96	9	0	0	0	0	0	0	0	0	0	0	0	0	0	0	0	0	0	0	0	0	0	0	0	0	0	0	1	13	0	0
Basidiomycota	Agaricomycetes			Cyphellostereum	NM	ITS1_01382	0	0	0	0	0	0	0	0	0	0	0	0	0	0	0	0	0	0	113	0	0	0	0	0	0	0	0	0	0	0	0	0	0	0	0	0	0	0	0	0	0	0	0
Ascomycota	Geoglossomycetes	Geoglossales	Geoglossaceae	Trichoglossum	NM	ITS1_01383	0	0	0	0	0	0	0	9	0	0	0	0	0	0	0	0	0	0	0	0	0	0	0	0	0	0	0	0	0	1	0	0	1	0	1	7	69	15	0	0	0	0	4
Ascomycota	Leotiomycetes	Helotiales			NM	ITS1_01384	0	0	0	0	0	0	0	0	0	0	0	0	0	0	0	0	0	0	1	0	0	0	0	0	0	0	0	0	88	0	0	0	0	0	0	0	0	0	0	0	0	0	0
Basidiomycota	Fungi_other				NM	ITS1_01386	0	0	0	1	0	0	0	0	0	0	0	0	1	0	0	4	0	0	116	0	0	0	0	0	0	0	0	0	0	0	0	0	0	0	0	0	0	0	0	0	0	0	0
Ascomycota	Eurotiomycetes	Chaetothyriales	Herpotrichiellaceae	Cladophialophora	NM	ITS1_01389	0	0	0	0	0	0	0	0	0	0	0	0	1	0	0	0	0	1	3	0	0	0	0	0	0	0	0	1	103	0	0	0	0	0	0	0	0	0	0	0	0	0	0
Ascomycota	Eurotiomycetes	Chaetothyriales	Herpotrichiellaceae	Cladophialophora	NM	ITS1_01391	0	0	1	0	0	0	0	0	0	0	0	0	4	0	0	14	2	2	3	0	1	11	28	1	5	0	1	11	0	0	0	0	0	0	0	0	0	0	0	0	0	1	0
Ascomycota	Leotiomycetes	Helotiales	Hyaloscyphaceae		NM	ITS1_01392	0	0	0	0	0	0	0	0	0	0	0	0	0	0	0	0	0	0	0	0	1	0	0	0	0	0	0	2	0	0	0	1	0	0	0	0	0	0	0	0	0	0	0
Basidiomycota	Agaricomycetes	Agaricales	Psathyrellaceae	Psathyrella	NM	ITS1_01394	0	0	0	0	0	0	0	0	0	0	0	0	0	71	0	0	0	0	0	0	0	0	0	0	0	0	0	0	0	2	0	0	0	0	0	0	0	0	0	0	0	0	47
Basidiomycota	Agaricomycetes	Agaricales	Pluteaceae	Pluteus	NM	ITS1_01395	0	0	0	0	0	0	0	0	0	0	0	0	1	0	65	0	0	0	0	0	0	0	0	0	0	0	0	0	0	0	1	0	0	0	0	0	0	0	0	0	0	0	0
Ascomycota	Eurotiomycetes				NM	ITS1_01397	0	2	1	0	0	0	0	0	0	0	0	0	0	0	0	0	0	0	0	0	0	0	0	0	0	0	0	0	0	0	79	38	0	1	0	0	0	0	0	0	0	0	0
Basidiomycota	Agaricomycetes	Russulales	Russulaceae	Lactarius	EcM	ITS1_01398	0	0	0	0	0	0	0	0	0	0	0	0	0	0	0	0	0	111	0	0	0	0	1	0	0	8	1	0	0	0	0	0	0	0	0	0	0	0	0	0	0	0	0
Basidiomycota	Agaricomycetes	Thelephorales	Thelephoraceae	Tomentella	EcM	ITS1_01399	0	0	0	0	0	0	0	0	0	0	0	0	0	0	0	0	18	24	0	0	2	0	2	0	36	0	3	0	0	0	0	0	0	0	0	0	0	0	0	0	0	0	0
Ascomycota	Eurotiomycetes	Chaetothyriales	Herpotrichiellaceae	Rhinocladiella	NM	ITS1_01400	0	0	0	0	0	0	0	0	0	0	0	0	0	0	0	0	0	0	0	0	0	0	0	0	0	0	0	0	101	0	0	0	0	0	0	0	0	0	0	0	0	0	0
Basidiomycota	Agaricomycetes	Sebacinales	Sebacinaceae		NM	ITS1_01401	0	0	0	1	2	2	0	0	0	0	0	6	0	89	0	1	0	0	0	0	0	0	0	0	0	0	0	0	0	0	0	0	0	2	1	0	0	0	0	0	3	0	13
Basidiomycota	Wallemiomycetes	Geminibasidiales	Geminibasidiaceae	Geminibasidium	NM	ITS1_01402	2	0	0	0	4	2	0	18	0	11	41	40	2	0	0	0	0	0	0	0	0	0	0	0	0	0	0	0	0	0	0	0	0	0	0	0	0	0	0	0	0	0	0
Basidiomycota	Agaricomycetes	Russulales	Russulaceae	Russula	EcM	ITS1_01403	0	0	0	0	0	0	0	0	0	0	0	0	0	0	0	0	0	0	0	0	0	0	0	0	0	0	0	3	0	0	0	0	0	0	0	0	0	0	0	0	0	0	0
Basidiomycota	Agaricomycetes	Russulales	Russulaceae	Russula	EcM	ITS1_01404	0	0	0	0	60	37	0	0	0	0	0	0	0	0	0	0	0	0	0	0	0	0	0	0	0	0	0	0	0	0	0	0	0	18	5	0	0	0	0	0	0	0	0
Basidiomycota	Agaricomycetes	Thelephorales	Thelephoraceae		EcM	ITS1_01405	0	0	0	0	0	0	0	0	0	0	0	0	0	0	0	0	1	0	0	0	1	0	1	0	0	85	10	1	0	0	0	0	0	0	0	0	0	0	0	0	1	0	0
Ascomycota	Leotiomycetes	Helotiales			NM	ITS1_01406	0	0	0	0	0	0	0	0	0	0	0	0	0	0	0	0	0	0	0	105	6	0	0	0	0	0	0	9	0	0	0	0	0	0	0	0	0	0	0	0	0	0	0
Ascomycota	Eurotiomycetes	Chaetothyriales	Herpotrichiellaceae	Cladophialophora	NM	ITS1_01408	0	0	0	0	0	0	0	75	0	0	0	0	1	0	1	0	0	0	0	0	0	0	0	0	0	0	0	0	0	0	0	0	0	0	0	0	42	0	0	0	0	1	0
Basidiomycota	Agaricomycetes	Agaricales	Cortinariaceae	Cortinarius	EcM	ITS1_01409	0	0	0	0	0	0	0	0	0	0	0	0	0	0	0	0	0	0	0	0	0	0	0	0	0	0	0	0	0	0	0	0	0	0	0	0	0	0	0	0	0	0	0
Basidiomycota	Agaricomycetes	Agaricales	Lycoperdaceae		NM	ITS1_01410	35	3	0	0	1	0	0	0	0	0	0	0	4	0	0	0	0	2	0	0	0	0	1	0	3	33	2	35	1	0	0	0	0	0	0	0	0	0	0	0	0	0	0
Basidiomycota	Agaricomycetes	Agaricales			EcM	ITS1_01411	0	0	0	0	0	0	0	0	0	0	0	0	0	0	0	0	0	1	0	0	0	0	48	0	0	0	0	0	0	0	0	0	0	0	0	0	0	0	0	0	0	0	0
Basidiomycota	Agaricomycetes	Sebacinales	Serendipitaceae		NM	ITS1_01413	0	0	0	1	0	0	0	0	0	0	0	0	0	0	0	0	0	0	70	0	0	0	0	0	0	0	0	0	0	0	0	0	0	0	0	0	0	0	0	0	0	0	0
Ascomycota	Dothideomycetes				NM	ITS1_01414	2	0	0	0	0	0	99	1	0	0	0	1	0	0	0	1	0	0	0	0	0	0	0	5	0	0	0	0	0	0	0	0	0	0	0	11	0	0	0	0	0	0	0
Basidiomycota	Agaricomycetes				NM	ITS1_01417	0	0	0	0	0	0	0	0	0	0	0	0	0	0	0	0	0	1	0	0	0	0	0	0	0	0	0	76	1	0	0	0	0	0	0	0	0	0	0	0	0	0	0
Ascomycota	Eurotiomycetes	Eurotiales	Trichocomaceae	Penicillium	NM	ITS1_01418	0	0	0	0	0	0	0	0	0	0	0	0	0	0	0	0	0	0	0	0	0	0	0	0	0	0	0	0	0	0	0	0	0	1	1	0	87	0	1	1	0	0	0
Kickxellomycota	Kickxellomycetes	Kickxellales	Kickxellaceae	Ramicandelaber	NM	ITS1_01420	2	0	0	0	15	11	0	0	0	0	0	0	0	18	0	0	0	0	0	0	0	0	0	0	0	0	0	0	0	3	0	0	0	34	8	0	0	0	0	0	0	0	28
Basidiomycota	Agaricomycetes	Agaricales	Entolomataceae	Clitopilus	NM	ITS1_01421	1	0	0	0	8	7	0	0	4	0	0	0	0	3	0	0	0	0	0	0	0	0	0	0	1	0	0	1	0	11	0	0	0	28	7	0	4	29	0	0	0	0	3
Ascomycota	Pezizomycetes	Pezizales	Pezizaceae		NM	ITS1_01422	0	0	0	0	0	0	0	0	0	1	0	0	0	0	114	1	0	0	0	0	0	0	0	0	0	0	0	0	0	0	0	0	0	0	0	0	0	0	0	0	0	1	0
Ascomycota	Eurotiomycetes	Eurotiales	Trichocomaceae	Aspergillus	NM	ITS1_01423	0	0	0	0	0	0	0	1	0	43	39	0	0	0	2	0	8	0	0	0	0	0	0	0	0	0	0	0	0	0	0	0	0	0	0	0	0	0	10	7	0	0	0
Basidiomycota	Agaricomycetes	Sebacinales	Sebacinaceae		EcM	ITS1_01427	0	0	0	88	0	0	0	0	0	0	0	0	0	1	0	0	0	0	0	0	0	0	0	0	0	0	0	0	0	0	0	0	29	0	0	0	0	0	0	0	0	0	0
Kickxellomycota	Kickxellomycetes	Kickxellales	Kickxellaceae	Ramicandelaber	NM	ITS1_01428	0	0	0	0	0	1	0	0	0	0	0	0	0	42	0	0	0	0	0	0	0	0	0	0	0	0	0	0	0	0	0	0	0	0	2	2	7	0	0	0	0	0	63
Basidiomycota	Agaricomycetes	Agaricales	Psathyrellaceae	Psathyrella	NM	ITS1_01429	0	0	0	0	0	0	0	0	0	0	0	0	54	0	0	0	0	0	0	0	0	0	0	0	0	0	0	0	0	1	0	0	2	1	0	0	0	0	0	0	0	51	0
Basidiomycota	Agaricomycetes	Agaricales	Inocybaceae	Inocybe	EcM	ITS1_01430	1	0	0	65	0	0	0	0	0	0	0	0	0	0	0	0	0	0	0	0	0	0	0	0	0	0	0	0	0	0	0	0	49	0	0	0	1	0	0	0	0	0	0
Basidiomycota	Agaricomycetes	Agaricales	Cortinariaceae	Cortinarius	EcM	ITS1_01431	0	0	0	0	0	0	0	0	0	0	0	0	0	0	0	0	0	0	0	118	0	0	0	0	0	0	0	0	0	0	0	0	0	0	0	0	0	0	0	0	0	0	0
Ascomycota	Eurotiomycetes	Eurotiales	Trichocomaceae	Penicillium	NM	ITS1_01432	0	0	0	0	0	0	0	0	0	0	0	0	0	0	0	0	0	0	0	0	0	6	0	0	2	0	0	0	0	0	0	0	0	0	0	1	0	0	0	0	0	1	0
Basidiomycota	Agaricomycetes	Trechisporales			NM	ITS1_01433	0	0	0	0	0	0	0	0	0	0	0	22	0	0	0	0	1	0	89	0	0	0	0	0	0	0	0	0	0	0	0	0	0	0	0	0	0	0	0	0	0	0	0
Basidiomycota	Agaricomycetes	Russulales	Russulaceae	Russula	EcM	ITS1_01434	0	0	0	0	61	56	0	0	0	0	0	0	0	0	0	0	0	0	0	0	0	0	0	1	0	0	0	0	0	0	0	0	0	0	0	0	0	0	0	0	0	0	0
Ascomycota	Eurotiomycetes	Chaetothyriales	Herpotrichiellaceae		NM	ITS1_01435	0	0	0	0	0	0	0	0	0	0	0	0	0	0	0	3	0	0	0	0	0	0	0	0	0	0	0	0	0	0	46	29	11	9	4	0	1	0	0	0	0	0	0
Ascomycota	Eurotiomycetes	Eurotiales	Trichocomaceae	Penicillium	NM	ITS1_01437	0	0	0	0	0	0	0	0	0	20	0	0	0	0	0	0	0	0	0	0	0	0	0	0	0	0	0	0	0	0	0	0	0	0	0	1	0	0	68	28	0	0	0
Basidiomycota	Agaricomycetes	Hymenochaetales	Hymenochaetaceae	Phellinus	NM	ITS1_01438	0	0	0	0	0	0	0	0	0	0	0	0	0	0	0	0	0	0	0	0	0	0	0	0	0	0	0	0	0	0	0	0	0	0	0	0	1	112	0	0	0	0	4
Basidiomycota	Agaricomycetes	Agaricales	Psathyrellaceae		NM	ITS1_01439	1	3	0	0	1	0	8	1	11	0	0	0	0	0	20	4	2	0	3	0	0	0	0	4	1	6	0	0	0	0	7	0	2	0	0	3	0	9	2	0	0	0	1
Basidiomycota	Agaricomycetes	Thelephorales	Thelephoraceae		EcM	ITS1_01440	0	0	0	0	0	0	0	0	0	0	0	0	0	0	0	0	0	0	0	0	0	0	1	0	0	0	0	2	111	0	0	0	0	0	0	0	0	0	0	0	0	0	0
Ascomycota	Sordariomycetes	Hypocreales	Hypocreaceae	Trichoderma	NM	ITS1_01441	0	0	0	1	0	0	8	0	84	2	2	0	1	2	0	0	1	0	0	0	0	4	1	0	1	6	4	0	0	0	0	0	0	0	0	0	0	0	0	0	0	0	0
Ascomycota	Eurotiomycetes	Chaetothyriales	Herpotrichiellaceae		NM	ITS1_01442	1	0	0	0	2	0	61	3	0	0	0	1	0	42	0	0	0	0	0	0	0	0	0	0	0	0	0	0	0	0	0	0	1	0	0	2	0	0	0	0	0	0	4
Basidiomycota	Agaricomycetes	Boletales			EcM	ITS1_01445	0	0	0	16	0	0	0	0	0	0	0	0	0	0	0	0	0	0	0	0	0	0	0	0	0	0	0	0	0	0	0	0	15	0	0	0	0	85	0	0	0	0	0
Ascomycota	Eurotiomycetes	Eurotiales	Trichocomaceae	Penicillium	NM	ITS1_01446	0	0	0	0	0	0	0	0	0	0	0	0	0	0	0	0	0	0	0	0	0	0	0	0	0	0	0	0	0	0	0	0	0	0	0	3	1	3	42	51	0	0	0
Basidiomycota	Agaricomycetes	Russulales	Stephanosporaceae		NM	ITS1_01447	0	0	0	0	0	0	0	0	0	0	0	0	0	0	0	0	0	0	81	0	0	0	0	0	0	0	0	0	0	0	0	0	0	0	0	0	0	0	0	0	0	0	0
Basidiomycota	Fungi_other				NM	ITS1_01448	0	76	36	0	0	0	0	0	0	0	0	0	0	0	0	1	0	0	0	0	0	0	2	0	0	0	0	0	0	0	0	0	0	0	0	0	0	0	0	0	0	0	0
Basidiomycota	Agaricomycetes	Agaricales	Inocybaceae	Inocybe	EcM	ITS1_01449	1	0	0	0	0	0	0	109	1	0	0	0	0	0	0	1	0	0	0	0	0	0	0	0	0	0	0	0	0	0	0	0	0	0	0	0	3	0	0	0	0	0	0
Basidiomycota	Agaricomycetes	Agaricales	Entolomataceae	Entoloma	NM	ITS1_01451	0	62	49	0	0	0	1	0	0	0	1	0	0	0	0	0	0	0	1	0	0	0	1	1	0	0	0	0	0	0	0	0	0	0	0	0	0	0	0	0	0	0	0
Basidiomycota	Agaricomycetes	Agaricales	Hygrophoraceae	Hygrocybe	NM	ITS1_01452	0	0	0	0	0	0	0	0	0	0	0	0	0	0	0	53	0	0	0	0	0	0	0	0	0	0	0	0	0	0	0	0	0	0	0	0	0	0	0	0	0	0	0
Ascomycota	Sordariomycetes	Xylariales			NM	ITS1_01453	0	0	0	1	0	0	0	0	0	0	0	88	27	0	0	0	0	0	0	0	0	0	0	0	0	0	0	0	0	0	0	0	0	0	0	0	0	0	0	0	0	0	0
Basidiomycota	Agaricomycetes	Agaricales			NM	ITS1_01454	0	0	0	0	0	0	0	0	0	0	0	0	0	0	0	0	0	0	0	0	0	0	106	0	0	0	0	0	0	0	0	0	0	0	0	0	0	0	0	0	0	0	0
Basidiomycota	Agaricomycetes	Thelephorales	Thelephoraceae	Tomentella	EcM	ITS1_01455	0	0	0	0	0	0	0	0	0	0	0	95	1	0	1	1	0	0	0	0	0	0	0	0	0	0	0	0	0	0	0	0	0	0	0	0	0	0	0	0	18	0	0
Ascomycota	Fungi_other				NM	ITS1_01456	0	0	0	0	0	0	0	0	0	0	0	0	0	0	0	55	1	14	0	0	12	0	0	0	0	3	6	25	0	0	0	0	0	0	0	0	0	0	0	0	0	0	0
Basidiomycota	Agaricomycetes	Thelephorales	Thelephoraceae	Tomentella	EcM	ITS1_01457	1	0	0	0	0	0	0	0	7	0	0	63	4	1	1	0	0	0	0	0	0	0	0	0	0	0	0	0	0	0	0	0	0	1	0	0	0	9	0	0	28	0	0
Mortierellomycota	Mortierellomycetes	Mortierellales	Mortierellaceae	Mortierella	NM	ITS1_01459	1	1	0	0	0	0	72	0	38	0	0	0	0	0	1	0	0	0	0	0	0	0	0	0	0	0	0	0	0	0	0	0	1	0	0	0	0	0	0	0	0	0	0
Basidiomycota	Agaricomycetes	Sebacinales	Sebacinaceae	Sebacina	EcM	ITS1_01460	0	0	0	0	0	0	0	0	0	0	0	0	0	0	0	0	7	0	0	0	0	2	0	68	0	0	0	0	2	0	0	0	0	0	0	0	0	0	0	0	0	0	0
Ascomycota	Sordariomycetes	Chaetosphaeriales			NM	ITS1_01461	2	0	0	2	0	0	7	1	31	0	0	0	0	3	2	0	0	0	0	0	0	0	0	1	31	30	1	3	0	0	0	0	0	0	0	0	0	0	0	0	0	0	0
Basidiomycota	Agaricomycetes	Cantharellales	Cantharellaceae		EcM	ITS1_01462	0	0	0	0	0	0	0	0	0	0	0	0	0	0	0	0	0	0	0	0	0	0	0	0	0	19	0	32	0	0	0	0	0	0	0	0	0	0	0	0	0	0	0
Ascomycota	Sordariomycetes	Coniochaetales	Coniochaetaceae	Lecythophora	NM	ITS1_01463	0	0	0	0	0	0	0	0	0	0	0	0	0	0	0	0	3	0	0	0	0	1	0	0	0	105	6	0	0	0	0	0	0	0	0	0	0	0	0	0	0	0	0
Basidiomycota	Agaricomycetes	Cantharellales	Cantharellaceae		EcM	ITS1_01464	0	0	0	0	0	0	0	0	0	0	0	0	0	0	0	0	0	0	0	0	0	0	0	0	0	0	0	0	0	0	0	0	0	0	0	0	0	0	0	0	0	0	0
Basidiomycota	Agaricomycetes	Agaricales	Tricholomataceae	Delicatula	NM	ITS1_01465	0	20	4	8	7	5	0	0	0	0	0	67	3	0	1	0	0	0	0	0	0	0	0	0	0	0	0	0	0	0	0	0	0	0	0	0	0	0	0	0	0	0	0
Basidiomycota	Agaricomycetes	Thelephorales	Thelephoraceae	Tomentella	EcM	ITS1_01468	0	0	0	34	0	0	0	0	0	0	0	0	0	0	0	0	2	33	0	0	0	0	0	2	0	35	8	1	0	0	0	0	0	0	0	0	0	0	0	0	0	0	0
Basidiomycota	Fungi_other				NM	ITS1_01470	0	0	0	0	0	0	0	0	0	0	0	0	0	0	0	0	0	0	0	0	0	0	0	0	0	0	0	0	0	0	81	33	0	0	0	0	0	0	0	0	0	0	0
Basidiomycota	Agaricomycetes	Agaricales	Hygrophoraceae	Gliophorus	NM	ITS1_01471	0	0	0	0	0	0	0	0	0	0	0	0	0	0	0	0	0	0	0	63	0	0	0	0	0	0	0	0	0	0	0	0	0	0	0	0	0	0	0	0	0	0	0
Ascomycota	Geoglossomycetes	Geoglossales			NM	ITS1_01472	0	0	0	0	0	0	0	0	0	0	0	0	0	0	0	0	0	0	1	0	0	0	0	0	0	0	0	0	0	0	0	0	1	0	0	1	1	0	1	0	0	0	0
Ascomycota	Dothideomycetes	Botryosphaeriales	Botryosphaeriaceae	Endomelanconiopsis	NM	ITS1_01473	2	0	0	0	1	0	2	0	1	26	5	4	0	4	1	0	0	0	0	0	0	0	0	0	0	0	0	0	0	0	0	0	0	0	0	0	0	0	62	5	0	1	0
Ascomycota	Leotiomycetes	Helotiales			NM	ITS1_01475	0	0	0	0	0	0	0	0	0	0	0	0	2	0	0	0	0	0	0	0	0	0	0	0	0	0	0	0	0	0	0	1	1	0	0	0	0	0	0	0	0	86	0
Ascomycota	Eurotiomycetes	Eurotiales	Trichocomaceae	Penicillium	NM	ITS1_01476	0	0	0	0	0	0	0	0	0	0	0	0	0	0	0	0	0	0	0	0	0	0	0	0	0	0	0	0	0	0	0	0	0	0	0	0	5	1	64	29	0	0	1
Basidiomycota	Agaricomycetes	Cantharellales	Clavulinaceae	Clavulina	EcM	ITS1_01477	0	0	0	0	0	0	0	0	0	0	0	0	0	0	0	0	0	0	0	89	0	0	0	0	0	0	0	0	0	0	0	0	0	0	0	0	0	0	0	0	0	0	0
Basidiomycota	Agaricomycetes	Hymenochaetales	Hymenochaetaceae	Coltriciella	EcM	ITS1_01479	23	0	0	0	0	0	0	0	0	0	0	0	0	0	0	0	0	0	0	0	0	0	0	0	0	0	0	0	0	90	0	0	0	0	0	0	0	0	0	0	0	0	0
Ascomycota	Eurotiomycetes				NM	ITS1_01481	0	0	0	0	0	0	0	4	0	0	0	0	0	0	0	0	0	0	0	0	0	0	0	0	0	0	0	0	0	0	0	0	0	0	0	0	109	0	0	0	0	0	0
Ascomycota	Sordariomycetes	Xylariales	Xylariaceae	Anthostomella	NM	ITS1_01482	0	0	0	0	0	0	0	0	0	0	0	0	0	0	0	0	0	0	110	0	0	0	1	0	1	0	0	1	0	0	0	0	0	0	0	0	0	0	0	0	0	0	0
Basidiomycota	Agaricomycetes	Agaricales	Inocybaceae		EcM	ITS1_01484	0	0	0	0	0	0	0	0	0	0	0	0	0	0	0	0	0	1	0	0	0	0	0	0	0	0	0	0	0	0	0	0	0	0	0	0	0	0	0	0	0	0	0
Basidiomycota	Agaricomycetes	Russulales	Russulaceae	Russula	EcM	ITS1_01485	0	0	0	0	0	0	0	0	0	0	0	0	0	0	0	0	0	1	0	0	0	0	0	61	0	0	0	0	0	0	0	0	0	0	0	0	0	0	0	0	0	0	0
Basidiomycota	Agaricomycetes	Russulales	Russulaceae		EcM	ITS1_01486	0	0	0	0	0	0	0	0	0	0	0	0	0	0	0	0	0	3	0	0	0	0	47	0	0	0	2	10	0	0	0	0	0	0	0	0	0	0	0	0	0	0	0
Ascomycota	Orbiliomycetes				NM	ITS1_01487	0	46	67	0	0	0	0	0	0	0	0	0	0	0	0	0	0	0	0	0	0	0	0	0	0	0	0	0	0	0	0	0	0	0	0	0	0	0	0	0	0	0	0
Mucoromycota	Mucoromycetes	Umbelopsidales	Umbelopsidaceae	Umbelopsis	NM	ITS1_01488	0	0	0	0	0	0	0	0	0	0	0	0	0	0	0	0	0	0	0	0	0	0	0	0	0	0	0	0	1	0	0	0	0	0	0	0	0	0	0	0	0	0	0
Basidiomycota	Agaricomycetes	Russulales	Russulaceae	Russula	EcM	ITS1_01489	0	0	0	0	0	0	0	0	0	0	0	0	0	0	0	0	0	110	0	0	0	0	3	0	0	0	0	0	0	0	0	0	0	0	0	0	0	0	0	0	0	0	0
Ascomycota	Geoglossomycetes	Geoglossales	Geoglossaceae	Trichoglossum	NM	ITS1_01490	0	0	0	0	0	0	0	0	0	0	0	0	0	0	0	0	0	0	0	0	0	0	0	0	0	0	0	0	0	0	0	0	0	0	0	0	0	0	1	0	0	0	112
Basidiomycota	Agaricomycetes	Russulales	Russulaceae	Russula	EcM	ITS1_01491	0	0	0	0	0	0	0	0	0	0	0	0	0	0	0	0	1	1	0	0	0	0	0	0	0	0	0	7	0	0	0	0	0	0	0	0	0	0	0	0	0	0	0
Basidiomycota	Agaricomycetes	Thelephorales	Thelephoraceae	Tomentella	EcM	ITS1_01493	0	0	0	0	0	0	0	0	0	0	0	0	0	0	0	0	0	7	0	0	0	0	1	0	1	6	1	18	0	0	0	0	0	0	0	0	0	0	0	0	0	0	0
Basidiomycota	Agaricomycetes			Cyphellostereum	NM	ITS1_01494	0	0	0	0	0	0	0	0	0	0	0	0	0	0	0	0	1	0	96	1	0	0	0	0	0	0	0	0	1	0	0	0	0	0	0	0	0	0	0	0	0	0	0
Mortierellomycota	Mortierellomycetes	Mortierellales	Mortierellaceae	Mortierella	NM	ITS1_01495	6	1	0	6	17	7	12	1	16	0	0	0	0	17	0	0	0	0	0	0	0	0	0	0	0	0	0	0	0	2	0	0	0	4	6	7	1	1	0	0	0	0	8
Basidiomycota	Agaricomycetes	Thelephorales	Thelephoraceae	Tomentella	EcM	ITS1_01496	0	0	0	0	0	0	0	0	0	0	0	0	0	0	0	0	0	0	0	0	0	0	0	0	0	0	0	0	0	0	0	0	0	0	0	0	0	0	0	0	0	0	0
Ascomycota	Leotiomycetes	Helotiales			NM	ITS1_01497	0	0	0	0	0	0	0	0	0	0	0	0	1	0	0	0	4	0	0	0	30	0	0	0	0	0	0	0	0	0	0	0	0	0	0	0	0	0	0	0	0	2	0
Ascomycota	Eurotiomycetes	Chaetothyriales	Herpotrichiellaceae		NM	ITS1_01498	0	0	0	0	0	0	0	0	0	0	0	0	0	0	0	0	0	0	0	0	0	0	0	0	0	0	0	0	0	0	0	0	0	0	0	81	0	0	1	0	0	0	30
Ascomycota	Sordariomycetes	Hypocreales			NM	ITS1_01499	2	0	0	0	0	0	0	0	2	0	0	0	14	0	0	3	32	0	0	0	0	0	0	0	59	0	0	0	0	0	0	0	0	0	0	0	0	0	0	0	0	0	0
Basidiomycota	Fungi_other				NM	ITS1_01500	0	0	0	0	0	0	0	0	0	0	0	0	0	0	0	0	0	0	0	0	0	0	0	0	0	0	0	0	0	0	0	0	0	0	0	0	0	0	1	0	0	0	0
Basidiomycota	Agaricomycetes	Agaricales	Inocybaceae	Inocybe	EcM	ITS1_01502	0	0	0	0	0	0	0	0	0	0	0	0	0	0	0	0	0	0	0	0	0	0	0	0	0	0	0	0	67	0	0	0	0	0	0	0	0	0	0	0	0	0	0
Basidiomycota	Agaricomycetes	Cantharellales	Clavulinaceae	Clavulina	EcM	ITS1_01503	0	0	0	0	0	0	0	0	0	0	0	0	0	0	0	0	1	1	0	0	50	0	1	1	0	0	0	0	0	0	0	0	0	0	0	0	0	0	0	0	0	0	0
Basidiomycota	Agaricomycetes	Cantharellales	Clavulinaceae		EcM	ITS1_01504	0	0	0	0	0	0	0	0	0	0	0	0	0	0	0	0	0	0	0	1	0	0	1	0	41	1	0	1	1	0	0	0	0	0	0	0	0	0	0	0	0	0	0
Basidiomycota	Agaricomycetes	Cantharellales			NM	ITS1_01505	0	0	0	0	0	0	0	0	0	0	0	0	0	0	0	0	0	0	89	8	0	0	0	0	0	0	0	0	0	0	0	0	0	0	0	0	0	0	0	0	0	0	0
Basidiomycota	Agaricomycetes	Thelephorales	Thelephoraceae	Tomentella	EcM	ITS1_01507	0	0	0	0	0	0	0	0	9	0	0	63	7	0	1	0	0	0	0	0	0	0	0	0	0	0	0	0	0	0	0	0	2	0	0	0	0	0	0	0	27	1	0
Ascomycota	Sordariomycetes	Hypocreales	Ophiocordycipitaceae		NM	ITS1_01509	0	0	0	0	0	0	1	0	0	0	0	0	17	0	0	0	3	0	0	0	0	10	7	1	4	11	56	0	0	0	0	0	0	0	0	0	0	0	0	0	0	0	0
Basidiomycota	Agaricomycetes	Agaricales			EcM	ITS1_01510	0	0	0	0	0	0	0	0	0	0	0	0	0	0	0	0	0	0	0	0	0	0	0	0	0	0	0	0	0	0	0	0	0	0	0	0	109	0	0	0	0	0	0
Basidiomycota	Agaricomycetes	Agaricales	Inocybaceae	Inocybe	EcM	ITS1_01511	0	1	0	47	0	0	0	0	0	0	0	0	0	0	0	0	0	0	0	0	0	0	0	0	0	0	0	0	0	0	0	0	63	0	0	0	0	0	0	0	0	0	0
Basidiomycota	Agaricomycetes	Agaricales	Strophariaceae	Psilocybe	NM	ITS1_01512	0	36	15	0	1	0	0	0	0	0	0	0	0	0	0	0	0	1	0	0	0	0	0	0	0	0	0	0	0	0	41	14	1	0	0	0	0	0	0	0	0	0	0
Basidiomycota	Agaricomycetes	Agaricales	Inocybaceae	Inocybe	EcM	ITS1_01513	0	0	0	1	0	0	0	0	0	0	1	0	0	0	100	0	0	0	0	0	0	0	0	0	0	0	0	0	0	0	0	0	0	0	0	0	0	0	0	0	0	0	0
Basidiomycota	Agaricomycetes	Trechisporales			NM	ITS1_01514	0	0	0	0	0	0	0	0	0	0	0	0	0	0	0	0	0	1	108	0	0	0	0	0	0	0	0	0	0	0	0	0	0	0	0	0	0	0	0	0	0	0	0
Ascomycota	Eurotiomycetes	Chaetothyriales	Herpotrichiellaceae	Exophiala	NM	ITS1_01515	0	0	0	0	0	0	3	0	0	0	0	0	0	0	84	0	0	0	0	0	0	0	0	0	0	0	0	0	0	0	0	0	0	0	0	0	0	0	0	0	0	0	0
Ascomycota	Leotiomycetes	Leotiales	Leotiaceae	Leotia	NM	ITS1_01516	0	19	9	54	7	0	0	0	0	1	3	0	0	0	0	0	0	0	0	0	0	0	0	0	0	0	0	0	0	0	0	0	12	0	0	0	0	0	1	1	0	0	0
Basidiomycota	Agaricomycetes	Russulales	Russulaceae	Russula	EcM	ITS1_01517	0	0	0	0	0	0	0	0	0	0	0	0	0	0	0	0	22	69	0	0	0	0	0	0	0	0	0	0	0	0	0	0	0	0	0	0	0	0	0	0	0	0	0
Mortierellomycota	Mortierellomycetes	Mortierellales	Mortierellaceae	Mortierella	NM	ITS1_01518	0	0	0	0	0	0	0	0	0	0	0	0	1	0	0	0	0	1	0	0	0	0	0	0	0	0	5	0	0	0	0	2	3	0	0	0	0	0	0	0	0	6	0
Basal lineages2	Fungi_other				NM	ITS1_01519	0	0	0	2	0	0	0	0	26	0	0	0	0	0	0	0	0	0	0	0	0	0	0	0	0	0	0	0	0	0	0	0	0	0	0	0	0	82	0	0	0	0	0
Basidiomycota	Agaricomycetes	Agaricales	Cortinariaceae	Cortinarius	EcM	ITS1_01523	0	0	0	0	0	0	0	0	0	0	0	0	0	0	0	0	0	0	0	3	0	0	1	0	0	0	0	95	0	0	0	0	0	0	0	0	0	0	0	0	0	0	0
Basidiomycota	Agaricomycetes	Agaricales	Hydnangiaceae		EcM	ITS1_01524	0	0	0	0	0	0	0	0	0	0	0	0	0	0	0	0	0	0	1	0	45	0	2	0	0	0	0	17	0	0	0	0	0	0	0	0	0	0	0	0	0	0	0
Basidiomycota	Agaricomycetes	Agaricales	Cortinariaceae	Cortinarius	EcM	ITS1_01525	0	0	0	0	0	0	0	0	0	0	0	0	0	0	0	0	0	0	0	0	0	0	0	0	0	0	0	0	0	0	0	0	0	0	0	0	0	0	0	0	0	0	0
Basidiomycota	Agaricomycetes	Russulales	Albatrellaceae		EcM	ITS1_01527	0	0	0	0	0	0	0	0	0	0	0	0	0	0	0	0	0	0	3	0	0	0	17	0	0	0	2	46	0	0	0	0	0	0	0	0	0	0	0	0	0	0	0
Basidiomycota	Agaricomycetes	Cantharellales	Clavulinaceae	Clavulina	EcM	ITS1_01528	0	0	0	0	0	0	0	0	0	0	0	0	0	0	0	0	0	0	1	0	0	43	15	2	29	0	0	0	0	0	0	0	0	0	0	0	0	0	0	0	0	0	0
Basidiomycota	Agaricomycetes	Agaricales	Inocybaceae	Inocybe	EcM	ITS1_01529	0	0	0	0	0	0	0	0	0	0	0	0	0	0	0	0	0	1	0	0	0	0	0	0	0	103	0	1	5	0	0	0	0	0	0	0	0	0	0	0	0	0	0
Ascomycota	Sordariomycetes	Xylariales	Amphisphaeriaceae	Pestalotiopsis	NM	ITS1_01530	0	0	0	0	0	0	0	0	0	0	0	0	5	0	0	0	32	0	1	0	0	31	1	0	19	10	10	1	0	0	0	0	0	0	0	0	0	0	0	0	0	0	0
Basidiomycota	Agaricomycetes	Thelephorales	Thelephoraceae	Tomentella	EcM	ITS1_01533	0	0	0	0	0	0	18	0	2	0	0	0	0	54	7	0	0	0	0	0	0	0	0	0	0	0	0	0	0	0	0	0	0	0	0	14	1	1	0	0	0	0	3
Ascomycota	Eurotiomycetes				NM	ITS1_01534	0	0	0	0	0	0	0	0	0	0	0	0	0	0	0	0	0	0	0	0	0	0	0	0	0	0	0	0	0	0	0	0	0	1	1	1	106	0	0	0	0	0	0
Ascomycota	Dothideomycetes				NM	ITS1_01535	0	4	2	13	0	0	0	0	0	0	0	0	0	0	0	1	0	0	0	0	0	0	0	0	0	0	0	2	0	0	32	15	37	0	0	0	0	0	0	0	0	1	0
Ascomycota	Eurotiomycetes	Chaetothyriales	Herpotrichiellaceae		NM	ITS1_01536	0	2	2	0	0	0	0	0	0	0	0	0	0	0	0	51	0	0	0	0	0	0	0	1	0	0	49	0	2	0	2	0	0	0	0	0	0	0	0	0	0	0	0
Basidiomycota	Agaricomycetes	Cantharellales	Cantharellaceae	Craterellus	EcM	ITS1_01537	0	0	0	0	0	0	0	0	0	0	0	0	0	0	0	0	2	48	0	0	0	0	0	0	10	6	6	0	0	0	0	0	0	0	0	0	0	0	0	0	0	0	0
Ascomycota	Dothideomycetes	Pleosporales			NM	ITS1_01538	0	0	0	0	0	0	0	0	61	0	0	0	0	0	0	0	0	0	0	0	0	0	0	0	0	0	0	0	0	0	0	0	0	0	0	0	0	46	0	0	0	0	0
Basidiomycota	Agaricomycetes	Agaricales	Inocybaceae	Inocybe	EcM	ITS1_01539	0	0	0	0	0	0	0	50	0	0	0	0	1	0	0	0	0	0	0	0	0	0	0	0	0	0	0	0	0	0	0	0	0	0	0	0	57	0	0	0	0	0	0
Basidiomycota	Agaricomycetes	Russulales	Russulaceae	Lactarius	EcM	ITS1_01540	0	0	0	0	0	0	0	0	0	0	0	0	0	0	0	0	0	2	0	0	0	0	0	0	0	0	0	0	0	0	0	0	0	0	0	0	0	0	0	0	0	0	0
Basidiomycota	Agaricomycetes			Cyphellostereum	NM	ITS1_01541	0	0	0	0	0	0	0	0	0	0	0	0	0	0	0	0	0	0	87	1	0	0	0	0	0	0	0	1	0	0	0	0	0	0	0	0	0	0	0	0	0	0	0
Basidiomycota	Agaricomycetes	Cantharellales	Cantharellaceae		EcM	ITS1_01542	0	0	0	40	0	0	0	0	0	0	1	0	0	0	0	0	0	0	0	0	0	0	0	0	0	6	0	0	0	0	0	0	55	0	0	0	0	0	0	0	0	0	0
Basidiomycota	Agaricomycetes	Agaricales	Inocybaceae	Inocybe	EcM	ITS1_01544	0	0	0	0	0	0	0	0	0	0	0	0	0	0	0	0	0	1	0	0	0	0	1	0	0	0	0	2	104	0	0	0	0	0	0	0	0	0	0	0	0	0	0
Basidiomycota	Agaricomycetes	Russulales	Russulaceae		EcM	ITS1_01545	0	0	0	0	0	0	0	0	0	0	0	0	0	0	0	0	0	76	0	0	0	0	0	0	0	0	0	1	0	0	0	0	0	0	0	0	0	0	0	0	0	0	0
Basidiomycota	Agaricomycetes	Thelephorales	Thelephoraceae		EcM	ITS1_01546	0	0	0	1	0	0	0	0	0	0	0	0	88	0	1	0	0	0	0	0	0	0	0	0	0	0	0	0	0	0	0	0	0	0	0	0	0	0	0	0	0	18	0
Ascomycota	Group0127				NM	ITS1_01547	1	0	0	0	11	7	0	85	1	0	0	0	0	0	0	0	0	0	0	0	0	0	3	0	0	0	0	0	0	0	0	0	0	0	0	0	0	0	0	0	0	0	0
Basidiomycota	Agaricomycetes	Russulales	Russulaceae	Russula	EcM	ITS1_01548	0	0	0	0	0	0	0	0	0	0	0	0	0	0	0	0	0	0	0	0	0	0	0	0	0	1	1	95	0	0	0	0	0	0	0	0	0	0	0	0	0	0	0
Basidiomycota	Agaricomycetes	Cantharellales	Clavulinaceae		EcM	ITS1_01549	0	0	0	0	0	0	0	0	0	0	0	0	0	0	0	0	0	1	0	0	0	0	0	80	0	1	0	3	0	0	0	0	0	0	0	0	0	0	0	0	0	0	0
Basidiomycota	Agaricomycetes	Agaricales	Clavariaceae		NM	ITS1_01550	0	0	0	0	0	0	0	104	0	0	1	0	0	1	0	0	0	0	0	0	0	0	0	0	0	0	0	0	0	0	0	0	0	0	0	0	1	0	0	0	0	0	0
Basidiomycota	Agaricomycetes	Sebacinales	Serendipitaceae		NM	ITS1_01551	0	0	0	0	0	0	0	0	0	0	0	0	0	0	0	0	0	0	59	0	0	11	15	1	0	1	0	0	0	0	0	0	0	0	0	0	0	0	0	0	0	0	0
Basidiomycota	Fungi_other				NM	ITS1_01552	0	0	0	0	0	0	0	0	0	0	0	0	0	0	0	0	0	0	82	0	0	0	0	0	0	0	0	0	0	0	0	0	0	0	0	0	0	0	0	0	0	0	0
Basidiomycota	Agaricomycetes	Thelephorales	Thelephoraceae	Tomentella	EcM	ITS1_01553	0	0	0	0	0	0	0	0	0	0	0	0	0	0	0	0	1	48	0	0	0	0	0	0	0	8	10	19	0	0	0	0	0	0	0	0	0	0	0	0	0	0	0
Basidiomycota	Agaricomycetes	Boletales	Sclerodermataceae	Scleroderma	EcM	ITS1_01554	46	0	0	0	11	4	0	1	0	0	0	1	0	0	0	0	0	0	0	0	0	0	1	0	0	0	0	0	0	36	0	0	0	4	2	0	0	0	0	0	0	0	0
Ascomycota	Eurotiomycetes	Chaetothyriales			NM	ITS1_01556	0	0	0	0	0	0	0	0	0	0	0	1	51	0	1	27	2	1	0	0	0	0	0	0	0	0	5	0	0	0	0	0	1	0	0	0	0	0	0	0	0	10	0
Basidiomycota	Agaricomycetes	Sebacinales	Serendipitaceae		NM	ITS1_01557	0	0	0	0	0	0	0	0	0	0	0	0	0	0	0	0	0	1	81	0	0	0	0	0	0	0	0	1	0	0	0	0	0	0	0	0	0	0	0	0	0	0	0
Basidiomycota	Wallemiomycetes	Geminibasidiales	Geminibasidiaceae	Geminibasidium	NM	ITS1_01558	0	0	0	0	0	0	0	6	0	0	0	2	0	0	0	0	0	1	0	0	0	0	0	0	0	0	1	72	0	0	0	0	1	0	0	0	3	0	4	7	5	1	0
Basidiomycota	Agaricomycetes	Agaricales	Cortinariaceae	Cortinarius	EcM	ITS1_01561	0	0	0	0	0	0	0	0	0	0	0	0	0	0	0	0	0	0	0	70	15	0	0	0	0	0	0	0	0	0	0	0	0	0	0	0	0	0	0	0	0	0	0
Ascomycota	Sordariomycetes	Xylariales			NM	ITS1_01563	0	0	0	0	0	0	0	0	0	0	0	0	0	0	0	0	0	0	0	0	0	0	0	0	0	0	0	0	0	0	0	0	0	1	0	0	0	0	0	0	83	23	0
Ascomycota	Eurotiomycetes	Chaetothyriales	Herpotrichiellaceae		NM	ITS1_01566	0	0	0	0	0	0	0	0	0	0	0	0	0	0	0	0	0	0	0	0	0	0	0	0	0	0	0	0	5	0	0	0	0	0	0	0	0	0	0	0	0	0	0
Basidiomycota	Wallemiomycetes	Geminibasidiales	Geminibasidiaceae	Geminibasidium	NM	ITS1_01568	2	0	0	0	0	0	0	0	0	3	77	20	2	0	0	0	0	1	0	0	0	0	0	0	0	0	0	0	0	0	0	0	0	0	0	0	0	0	0	0	0	0	0
Basidiomycota	Fungi_other				NM	ITS1_01571	1	1	0	0	36	23	0	0	0	1	0	0	0	0	0	0	0	0	0	0	0	0	0	0	0	0	0	0	0	0	0	0	1	31	12	0	0	0	0	0	0	0	0
Basidiomycota	Agaricomycetes	Cantharellales	Clavulinaceae	Clavulina	EcM	ITS1_01572	0	0	0	0	0	1	0	0	0	0	0	0	0	0	0	0	4	0	0	0	0	72	24	3	0	0	0	2	0	0	0	0	0	0	0	0	0	0	0	0	0	0	0
Basidiomycota	Agaricomycetes	Thelephorales	Thelephoraceae	Tomentella	EcM	ITS1_01573	0	0	0	0	0	0	0	0	0	0	0	0	0	0	0	0	0	23	0	0	0	3	0	0	1	0	0	67	0	0	0	0	0	0	0	0	0	0	0	0	0	0	0
Basidiomycota	Agaricomycetes	Sebacinales	Sebacinaceae		EcM	ITS1_01575	0	0	0	0	0	0	0	0	0	0	0	0	0	0	0	0	0	86	0	0	1	0	1	0	0	0	0	0	0	0	0	0	0	0	0	0	0	0	0	0	0	0	0
Basidiomycota	Agaricomycetes	Russulales	Russulaceae	Russula	EcM	ITS1_01576	0	0	0	0	0	0	0	0	0	0	0	0	6	0	0	0	0	0	0	0	0	0	0	0	0	0	0	0	0	0	0	0	0	0	0	0	0	0	23	42	21	13	0
Basidiomycota	Agaricomycetes	Russulales	Russulaceae		EcM	ITS1_01577	0	0	0	0	0	0	0	0	0	0	14	36	4	0	0	1	0	0	0	0	0	0	0	0	0	0	0	0	0	0	0	0	0	0	0	0	0	0	1	11	32	6	0
Basidiomycota	Agaricomycetes	Russulales	Russulaceae	Russula	EcM	ITS1_01578	0	0	0	0	0	0	0	0	0	0	0	0	0	0	0	0	2	0	0	0	0	0	0	0	0	0	2	10	0	0	0	0	0	0	1	0	0	0	0	0	0	0	0
Basidiomycota	Agaricomycetes	Polyporales	Ganodermataceae	Ganoderma	NM	ITS1_01579	0	6	3	2	0	0	1	0	1	4	6	11	1	11	1	0	0	0	0	0	0	0	0	0	0	0	0	0	0	0	12	2	2	2	0	1	2	1	16	3	9	0	7
Mucoromycota	Mucoromycetes	Umbelopsidales	Umbelopsidaceae	Umbelopsis	NM	ITS1_01580	0	0	0	0	0	0	0	0	0	0	0	0	0	0	0	0	0	0	0	0	0	0	0	0	0	0	1	0	0	0	0	0	1	0	0	0	0	0	0	0	0	0	0
Basidiomycota	Agaricomycetes	Cantharellales	Cantharellaceae		EcM	ITS1_01581	0	0	0	22	0	0	0	0	0	0	0	0	0	0	0	0	0	0	0	0	0	0	0	40	0	0	0	0	0	0	0	0	18	0	0	0	0	0	0	0	0	0	0
Ascomycota	Sordariomycetes	Hypocreales	Clavicipitaceae		NM	ITS1_01582	0	0	0	0	0	0	0	0	0	0	0	0	0	0	0	0	4	0	0	0	0	0	1	0	0	12	88	0	0	0	0	0	0	0	0	0	0	0	0	0	0	0	0
Basidiomycota	Agaricomycetes	Agaricales	Mycenaceae		NM	ITS1_01584	0	0	0	0	0	0	0	0	72	0	0	0	0	0	0	0	0	0	0	0	0	0	0	0	0	0	0	0	0	0	0	0	0	0	0	0	0	33	0	0	0	0	0
Basidiomycota	Agaricomycetes	Russulales	Russulaceae	Russula	EcM	ITS1_01585	0	0	0	0	0	0	0	0	0	0	0	0	0	0	0	0	0	0	0	0	0	0	0	0	0	0	0	105	0	0	0	0	0	0	0	0	0	0	0	0	0	0	0
Basidiomycota	Agaricomycetes	Thelephorales	Thelephoraceae	Tomentella	EcM	ITS1_01586	0	0	0	0	0	0	0	0	0	0	0	0	0	0	0	0	0	0	0	0	0	0	0	0	0	0	0	0	81	0	0	0	0	0	0	0	0	0	0	0	0	0	0
Basidiomycota	Agaricomycetes	Thelephorales	Thelephoraceae	Tomentella	EcM	ITS1_01588	1	0	0	1	5	1	0	96	0	0	1	0	0	0	0	0	0	0	0	0	0	0	0	0	0	0	0	0	0	0	0	0	0	0	0	0	0	0	0	0	0	0	0
Ascomycota	Eurotiomycetes	Chaetothyriales	Herpotrichiellaceae		NM	ITS1_01589	0	0	0	0	0	0	0	3	0	0	0	0	0	0	0	0	0	0	0	0	0	0	0	0	0	0	0	0	0	0	0	0	0	2	2	0	94	0	0	0	0	0	4
Ascomycota	Fungi_other				NM	ITS1_01590	0	0	0	0	0	0	0	0	0	0	0	0	0	0	0	0	0	0	0	98	7	0	0	0	0	0	0	0	0	0	0	0	0	0	0	0	0	0	0	0	0	0	0
Ascomycota	Eurotiomycetes	Chaetothyriales	Herpotrichiellaceae	Cladophialophora	NM	ITS1_01591	0	0	0	0	0	0	0	0	0	4	2	78	2	0	1	0	0	0	0	0	0	0	0	0	0	0	0	0	0	0	0	0	0	0	0	0	0	0	3	0	14	0	0
Ascomycota	Dothideomycetes	Pleosporales			NM	ITS1_01594	0	0	0	0	0	0	0	0	0	0	0	0	0	0	0	0	0	0	0	0	0	0	0	0	0	0	0	0	0	0	0	0	0	0	0	0	104	0	0	0	0	0	0
Basidiomycota	Agaricomycetes	Agaricales	Inocybaceae	Inocybe	EcM	ITS1_01596	0	0	0	0	0	0	0	0	0	0	0	0	0	0	0	0	0	0	0	0	0	0	0	0	0	0	0	0	6	0	0	0	0	0	0	0	0	0	0	0	0	0	0
Basidiomycota	Agaricomycetes	Cantharellales	Clavulinaceae	Clavulina	EcM	ITS1_01597	0	0	0	0	0	0	0	0	0	0	0	0	0	0	0	0	0	0	0	0	0	0	0	1	0	0	0	0	0	0	0	0	0	0	0	0	0	0	0	0	0	0	0
Ascomycota	Eurotiomycetes				NM	ITS1_01598	0	1	0	0	0	0	74	1	0	0	0	0	0	0	1	0	0	0	0	0	0	0	0	0	0	0	0	0	0	0	0	0	0	0	0	27	0	0	0	0	0	0	0
Ascomycota	Eurotiomycetes	Chaetothyriales	Herpotrichiellaceae		NM	ITS1_01599	0	0	0	0	0	0	0	0	0	0	0	0	0	0	0	0	0	0	0	0	0	0	0	0	0	0	0	0	75	0	0	0	0	0	0	0	0	0	0	0	0	0	0
Basidiomycota	Fungi_other				NM	ITS1_01600	0	0	0	0	0	0	0	0	0	0	0	0	0	0	1	0	0	0	0	0	0	0	0	0	0	0	0	0	0	0	68	35	0	0	0	0	0	0	0	0	0	0	0
Ascomycota	Eurotiomycetes	Chaetothyriales	Herpotrichiellaceae		NM	ITS1_01601	0	0	0	0	0	0	0	0	0	1	1	96	3	0	2	0	0	0	0	0	0	0	0	0	0	0	0	0	0	0	0	0	0	0	0	0	0	0	0	0	1	0	0
Ascomycota	Sordariomycetes	Sordariales	Lasiosphaeriaceae	Cladorrhinum	NM	ITS1_01602	0	0	0	0	0	0	0	0	3	0	0	0	0	98	2	0	0	0	0	0	0	0	0	0	0	0	0	0	0	0	0	0	0	0	0	0	0	0	0	0	0	0	0
Ascomycota	Dothideomycetes	Pleosporales	Didymellaceae	Rhizopycnis	NM	ITS1_01604	0	0	0	0	1	1	6	5	36	0	0	0	0	3	5	0	0	0	0	0	0	0	0	0	0	0	0	0	0	0	0	0	0	1	0	18	6	9	0	0	0	0	3
Basidiomycota	Agaricomycetes	Agaricales	Marasmiaceae	Hydropus	NM	ITS1_01605	0	0	0	0	0	0	0	0	0	0	0	0	0	0	0	0	0	1	0	0	59	0	1	0	0	0	0	0	0	0	0	0	0	0	0	0	0	0	0	0	0	0	0
Basidiomycota	Agaricomycetes	Agaricales	Entolomataceae	Entoloma	NM	ITS1_01606	0	0	0	0	0	0	0	0	0	0	0	0	0	0	0	59	0	0	1	0	0	0	12	1	0	0	0	0	0	0	0	0	0	0	0	0	0	0	0	0	0	0	0
Basidiomycota	Agaricomycetes	Agaricales	Cortinariaceae	Cortinarius	EcM	ITS1_01607	0	0	0	0	0	0	0	0	0	0	0	0	0	0	0	0	0	1	0	0	0	0	12	0	0	0	0	0	0	0	0	0	0	0	0	0	0	0	0	0	0	0	0
Basidiomycota	Agaricomycetes	Thelephorales	Thelephoraceae	Tomentellopsis	EcM	ITS1_01608	0	0	0	0	0	0	0	0	0	0	0	0	0	0	0	0	0	0	0	15	79	0	0	0	0	0	0	0	0	0	0	0	0	0	0	0	0	0	0	0	0	0	0
Basidiomycota	Agaricomycetes	Cantharellales	Clavulinaceae	Clavulina	EcM	ITS1_01609	0	0	0	0	0	0	0	0	0	0	0	0	0	0	0	0	0	0	0	93	5	0	0	0	0	0	0	0	0	0	0	0	0	0	0	0	0	0	0	0	0	0	0
Mucoromycota	Mucoromycetes	Umbelopsidales	Umbelopsidaceae	Umbelopsis	NM	ITS1_01610	0	0	0	0	0	0	0	0	0	24	27	15	4	0	1	0	0	0	0	0	0	0	0	0	0	0	0	0	0	0	1	0	0	0	0	0	0	0	10	5	15	1	0
Ascomycota	Eurotiomycetes	Eurotiales	Trichocomaceae	Paecilomyces	NM	ITS1_01611	0	0	0	0	1	0	39	1	59	0	0	0	0	0	0	0	0	0	0	0	0	0	0	0	3	0	0	0	0	0	0	0	0	0	0	0	0	0	0	0	0	0	0
Basidiomycota	Agaricomycetes	Atheliales	Atheliaceae	Piloderma	EcM	ITS1_01613	0	0	0	0	0	0	0	0	0	0	0	0	0	0	0	0	0	0	0	0	0	0	0	0	0	1	0	0	77	0	0	0	0	0	0	0	0	0	0	0	0	0	0
Mortierellomycota	Mortierellomycetes	Mortierellales	Mortierellaceae	Mortierella	NM	ITS1_01616	1	0	0	4	0	0	28	0	25	0	0	0	0	13	16	0	0	0	0	0	0	0	0	0	0	0	0	0	0	0	0	0	0	0	0	10	0	3	0	0	0	0	1
Basidiomycota	Agaricomycetes	Thelephorales	Thelephoraceae		EcM	ITS1_01618	0	0	0	0	0	0	0	0	0	0	0	0	0	0	0	0	1	0	0	0	0	0	0	0	0	0	0	0	26	0	0	0	0	0	0	0	0	0	0	0	0	0	0
Ascomycota	Eurotiomycetes	Chaetothyriales			NM	ITS1_01620	0	0	0	0	0	0	0	0	0	0	0	0	0	0	0	0	0	0	0	96	6	0	0	0	0	0	0	0	0	0	0	0	0	0	0	0	0	0	0	0	0	0	0
Basidiomycota	Agaricomycetes	Agaricales	Entolomataceae	Entoloma	NM	ITS1_01622	0	9	11	0	0	0	0	0	1	0	0	0	0	0	0	0	0	0	0	0	0	0	0	0	0	0	0	0	0	0	56	23	0	0	1	0	0	0	0	0	0	0	0
Basidiomycota	Agaricomycetes	Agaricales	Inocybaceae	Inocybe	EcM	ITS1_01623	0	0	0	0	0	0	0	0	0	0	0	0	0	0	0	0	0	0	0	0	0	0	2	53	0	1	0	0	0	0	0	0	0	0	0	0	0	0	0	0	0	0	0
Basidiomycota	Agaricomycetes	Thelephorales	Bankeraceae	Sarcodon	EcM	ITS1_01624	0	0	0	0	0	0	0	0	0	0	0	0	0	0	0	0	0	0	0	0	0	0	0	0	0	0	39	1	0	0	0	0	0	0	0	0	0	0	0	0	0	0	0
Basidiomycota	Agaricomycetes	Agaricales	Marasmiaceae	Marasmius	NM	ITS1_01625	0	0	0	0	0	0	0	0	0	1	0	56	0	0	0	0	0	0	0	0	0	0	0	0	0	0	0	0	0	0	0	0	1	0	0	0	0	0	1	0	42	0	0
Basidiomycota	Agaricomycetes	Thelephorales	Thelephoraceae	Tomentella	EcM	ITS1_01626	0	0	0	0	0	0	0	0	0	0	0	0	0	0	0	0	0	0	0	0	0	0	0	0	0	0	0	0	0	0	0	0	0	0	0	0	0	4	0	0	0	0	0
Ascomycota	Eurotiomycetes	Eurotiales	Trichocomaceae	Penicillium	NM	ITS1_01628	0	0	0	0	0	1	29	60	0	1	0	0	0	0	0	0	6	0	0	0	0	1	0	0	0	0	0	0	0	0	0	0	0	0	0	1	2	0	1	0	0	0	0
Ascomycota	Sordariomycetes	Sordariales			NM	ITS1_01629	0	2	1	1	0	0	0	0	0	0	0	0	1	0	0	19	1	1	0	0	0	2	0	4	1	5	0	3	0	12	1	4	0	1	1	0	0	0	0	0	0	0	0
Basidiomycota	Agaricomycetes	Agaricales	Inocybaceae	Inocybe	EcM	ITS1_01632	0	0	0	0	0	0	0	0	0	0	0	0	0	0	0	0	0	49	0	0	0	0	0	0	0	0	1	9	0	0	0	0	0	0	0	0	0	0	0	0	0	0	0
Basidiomycota	Agaricomycetes	Gomphales	Gomphaceae		EcM	ITS1_01633	0	0	0	0	0	0	0	0	0	0	0	0	0	0	0	0	0	0	0	0	0	0	6	0	0	0	0	0	0	0	0	0	0	0	0	0	0	0	0	0	0	0	0
Basidiomycota	Agaricomycetes	Agaricales	Hygrophoraceae	Hygrocybe	NM	ITS1_01634	0	0	0	0	0	0	0	1	0	0	0	0	0	49	0	1	0	0	0	0	0	0	0	0	0	0	0	0	0	0	0	0	0	0	0	0	2	0	0	0	0	0	46
Basidiomycota	Agaricomycetes	Russulales	Russulaceae	Russula	EcM	ITS1_01635	1	0	0	0	1	0	0	0	0	0	0	0	89	0	0	0	0	0	0	0	0	0	0	0	0	0	0	0	0	2	0	0	0	0	0	0	0	0	0	0	0	8	0
Basidiomycota	Agaricomycetes	Thelephorales	Thelephoraceae	Tomentella	EcM	ITS1_01636	0	0	0	0	0	0	0	0	0	0	0	0	0	0	88	0	0	0	0	0	0	0	0	0	0	0	0	0	0	0	0	0	0	0	0	0	0	0	0	0	0	0	0
Basidiomycota	Agaricomycetes	Atheliales	Atheliaceae	Corella	NM	ITS1_01637	0	0	0	0	0	0	0	0	0	0	0	0	0	0	0	0	1	1	95	0	0	0	0	0	0	0	0	0	0	0	0	0	0	0	0	0	0	0	0	0	0	0	0
Basidiomycota	Agaricomycetes	Russulales	Russulaceae	Russula	EcM	ITS1_01638	0	0	0	0	0	0	0	1	0	0	0	0	0	0	0	0	0	1	1	0	0	0	0	98	0	0	0	0	0	0	0	0	0	0	0	0	0	0	0	0	0	0	0
Ascomycota	Dothideomycetes	Pleosporales	Montagnulaceae	Paraconiothyrium	NM	ITS1_01639	0	0	0	0	0	0	0	0	0	0	0	0	0	0	0	5	6	5	46	16	0	1	0	1	0	6	3	6	0	0	0	0	0	0	0	0	0	0	0	0	0	0	0
Basidiomycota	Agaricomycetes	Sebacinales			NM	ITS1_01640	0	0	0	0	0	0	0	0	0	0	0	0	0	0	0	81	0	0	0	0	0	0	0	0	0	0	0	0	0	0	0	0	0	0	0	0	0	0	0	0	0	0	0
Ascomycota	Eurotiomycetes	Eurotiales	Trichocomaceae	Paecilomyces	NM	ITS1_01641	0	0	0	0	0	0	0	0	0	0	0	0	0	0	0	0	60	0	0	0	0	7	2	0	23	2	6	1	0	0	0	0	0	0	0	0	0	0	0	0	0	0	0
Basidiomycota	Agaricomycetes	Thelephorales	Thelephoraceae		EcM	ITS1_01642	0	0	0	0	0	0	0	0	0	0	0	0	0	0	0	0	0	0	0	0	0	0	0	0	0	0	0	0	101	0	0	0	0	0	0	0	0	0	0	0	0	0	0
Ascomycota	Eurotiomycetes				NM	ITS1_01644	0	0	0	0	0	0	0	0	0	0	0	0	0	0	0	0	0	0	0	0	0	0	0	0	0	0	0	0	0	0	0	0	0	0	0	2	98	0	0	0	0	0	0
Basidiomycota	Agaricomycetes	Agaricales	Psathyrellaceae		NM	ITS1_01645	0	30	2	0	0	0	0	0	0	0	0	21	0	0	0	1	0	0	0	0	1	0	0	0	0	0	0	0	0	0	17	5	0	0	0	0	0	0	0	0	23	0	0
Basidiomycota	Agaricomycetes	Agaricales	Inocybaceae	Inocybe	EcM	ITS1_01647	0	0	0	0	0	0	0	0	0	0	0	0	0	0	0	0	0	65	0	0	0	0	0	0	0	4	0	0	0	0	0	0	0	0	0	0	0	0	0	0	0	0	0
Basidiomycota	Agaricomycetes	Russulales	Russulaceae	Lactarius	EcM	ITS1_01649	0	0	0	0	0	0	0	0	0	0	0	0	0	0	0	1	0	0	0	0	0	0	0	0	0	0	1	97	1	0	0	0	0	0	0	0	0	0	0	0	0	0	0
Ascomycota	Sordariomycetes	Hypocreales	Hypocreaceae	Trichoderma	NM	ITS1_01650	1	0	0	1	0	1	0	0	12	3	2	0	0	0	1	0	5	1	0	0	0	30	8	1	17	9	7	1	0	0	0	0	0	0	0	0	0	0	0	0	0	0	0
Basidiomycota	Agaricomycetes	Sebacinales			NM	ITS1_01651	0	0	0	0	0	0	0	0	0	0	0	0	0	0	0	0	0	0	0	0	0	0	0	0	0	0	0	0	54	0	0	0	0	0	0	0	0	0	0	0	0	0	0
Basidiomycota	Agaricomycetes	Thelephorales	Thelephoraceae		EcM	ITS1_01652	0	0	0	0	0	0	0	0	0	0	0	0	0	0	0	0	0	0	0	0	0	0	0	0	0	0	0	0	80	0	0	0	0	0	0	0	0	0	0	0	0	0	0
Basidiomycota	Agaricomycetes	Thelephorales	Thelephoraceae	Tomentella	EcM	ITS1_01653	0	0	0	16	1	0	0	0	0	0	0	0	0	0	0	0	11	22	0	0	0	0	0	1	0	3	2	43	1	0	0	0	0	0	0	0	0	0	0	0	0	0	0
Ascomycota	Leotiomycetes	Helotiales	Dermateaceae		NM	ITS1_01654	0	0	0	0	0	0	0	0	0	0	0	0	0	0	0	0	0	0	0	0	0	0	1	0	0	0	0	5	0	0	0	1	0	0	0	0	0	0	0	0	0	0	0
Basidiomycota	Agaricomycetes				NM	ITS1_01657	0	0	0	0	0	0	0	0	0	0	0	0	0	0	0	80	2	7	5	0	0	0	0	0	0	0	0	0	0	0	0	0	0	0	0	0	0	0	0	0	0	0	0
Basidiomycota	Agaricomycetes	Sebacinales	Sebacinaceae		EcM	ITS1_01658	0	0	0	0	0	0	0	0	0	0	0	0	0	0	0	0	2	81	0	0	0	0	0	0	1	0	13	0	1	0	0	0	0	0	0	0	0	0	0	0	0	0	0
Basidiomycota	Agaricomycetes	Thelephorales	Thelephoraceae	Tomentella	EcM	ITS1_01659	0	0	0	0	42	18	0	0	0	0	0	0	0	0	1	0	0	0	0	0	0	0	0	0	0	1	5	19	1	0	0	0	0	6	3	0	0	0	0	0	0	0	0
Basidiomycota	Agaricomycetes	Thelephorales	Thelephoraceae		EcM	ITS1_01660	0	0	0	0	0	0	0	0	0	0	0	0	0	0	0	0	0	1	0	0	0	0	0	1	0	0	2	68	0	0	0	0	0	0	0	0	0	0	0	0	0	0	0
Basidiomycota	Agaricomycetes	Geastrales	Geastraceae	Geastrum	NM	ITS1_01661	0	1	0	0	0	0	0	0	0	0	0	0	0	18	0	0	0	0	0	0	0	0	0	0	0	0	0	0	0	0	0	0	0	0	0	0	0	0	0	0	0	0	80
Ascomycota	Fungi_other				NM	ITS1_01662	0	0	0	0	0	0	0	74	0	0	0	1	0	0	0	0	0	0	0	0	0	0	0	0	0	0	0	0	0	0	0	0	0	0	0	0	24	0	0	0	0	0	0
Basidiomycota	Agaricomycetes	Agaricales	Psathyrellaceae	Coprinopsis	NM	ITS1_01663	0	0	0	0	0	0	0	0	0	0	0	0	0	0	18	0	0	0	0	0	0	0	0	0	0	0	0	0	0	0	0	0	0	0	0	0	0	0	0	0	0	0	0
Basidiomycota	Agaricomycetes	Russulales	Russulaceae	Russula	EcM	ITS1_01664	0	0	0	0	0	0	0	0	0	0	0	0	0	0	0	0	0	0	0	0	0	0	0	0	0	0	0	0	0	0	0	0	3	2	0	0	93	0	0	0	0	1	0
Basidiomycota	Agaricomycetes	Russulales	Russulaceae	Russula	EcM	ITS1_01665	0	0	0	0	0	0	0	0	0	0	0	0	0	0	0	0	0	0	0	0	0	0	0	0	0	0	0	0	0	0	0	0	2	0	0	0	0	0	0	0	0	97	0
Basidiomycota	Agaricomycetes	Thelephorales	Thelephoraceae		EcM	ITS1_01666	0	0	0	2	0	0	0	0	0	0	0	0	0	96	1	0	0	0	0	0	0	0	0	0	0	0	0	0	0	0	0	0	0	0	0	0	0	0	0	0	0	0	0
Ascomycota	Sordariomycetes	Hypocreales	Cordycipitaceae		NM	ITS1_01668	0	0	0	6	1	0	0	0	0	5	18	38	5	0	0	0	3	7	0	10	0	0	0	0	0	0	3	2	1	0	0	0	0	0	0	0	0	0	0	0	0	0	0
Basidiomycota	Fungi_other				NM	ITS1_01669	0	0	0	0	0	0	0	0	0	0	0	0	0	0	0	0	0	0	0	0	0	0	0	0	0	0	0	0	0	0	65	31	1	0	0	0	0	0	0	0	0	0	0
Ascomycota	Fungi_other				NM	ITS1_01670	0	0	0	0	0	0	0	0	0	0	0	1	0	0	0	58	0	0	0	0	0	0	0	0	0	0	0	0	0	0	0	0	0	0	0	0	0	0	0	0	0	0	0
Basidiomycota	Agaricomycetes	Agaricales	Hygrophoraceae	Camarophyllus	NM	ITS1_01672	0	0	0	0	0	0	0	0	0	0	0	0	0	0	0	0	1	0	0	0	0	0	0	0	39	0	0	0	1	0	0	0	0	0	0	0	0	0	0	0	0	0	0
Basidiomycota	Agaricomycetes	Agaricales	Cortinariaceae	Cortinarius	EcM	ITS1_01673	0	0	0	0	0	0	0	0	0	0	0	0	0	0	0	0	0	1	0	0	0	0	0	0	0	0	0	62	0	0	0	0	0	0	0	0	0	0	0	0	0	0	0
Basidiomycota	Agaricomycetes	Agaricales	Inocybaceae	Inocybe	EcM	ITS1_01674	0	0	0	0	0	0	92	0	0	1	1	1	0	0	1	1	0	0	0	0	0	0	0	0	0	0	0	0	0	0	0	0	0	0	0	0	0	0	0	0	0	0	0
Basidiomycota	Agaricomycetes	Agaricales	Tricholomataceae		NM	ITS1_01677	0	0	0	0	0	0	0	1	0	0	0	21	0	0	0	0	0	0	0	0	0	0	0	0	0	0	0	0	0	0	0	0	0	0	0	0	0	0	1	0	69	1	0
Basidiomycota	Agaricomycetes	Cantharellales	Clavulinaceae		EcM	ITS1_01678	0	0	0	0	0	0	0	0	0	0	0	0	0	0	0	0	0	0	0	0	0	0	0	0	0	0	0	0	0	0	0	0	0	0	0	0	0	0	1	0	0	0	0
Basidiomycota	Agaricomycetes	Thelephorales	Thelephoraceae		EcM	ITS1_01679	0	0	0	0	0	0	0	0	0	0	0	0	0	0	0	0	0	1	0	0	1	40	0	34	1	1	3	4	0	0	0	0	0	0	0	0	0	0	0	0	0	0	0
Ascomycota	Sordariomycetes	Xylariales	Amphisphaeriaceae	Pestalotiopsis	NM	ITS1_01680	10	2	4	3	11	8	1	4	0	20	25	6	1	0	1	0	0	0	0	0	0	0	0	0	0	0	2	0	0	0	0	0	0	0	0	0	0	0	0	0	0	0	0
Ascomycota	Eurotiomycetes	Chaetothyriales	Herpotrichiellaceae		NM	ITS1_01681	0	0	0	0	0	0	0	0	0	7	7	81	3	0	0	0	0	0	0	0	0	0	0	0	0	0	0	0	0	0	0	0	0	0	0	0	0	0	0	0	0	0	0
Ascomycota	Eurotiomycetes	Chaetothyriales	Herpotrichiellaceae		NM	ITS1_01682	0	0	0	0	0	0	0	3	0	0	0	1	0	0	0	0	0	0	0	0	0	0	0	0	0	0	0	0	0	0	0	0	0	0	0	21	72	0	0	0	0	0	1
Basidiomycota	Agaricomycetes	Thelephorales	Thelephoraceae		EcM	ITS1_01683	0	1	0	0	0	0	47	0	3	1	1	0	1	0	0	0	0	0	0	0	0	0	0	0	0	0	0	0	0	0	0	0	1	0	0	40	1	0	0	0	0	0	0
Basidiomycota	Agaricomycetes	Thelephorales	Thelephoraceae		EcM	ITS1_01685	0	0	0	0	0	0	0	0	0	0	0	0	0	0	0	0	0	0	0	0	0	0	0	0	0	0	4	51	1	0	0	0	0	0	0	0	0	0	0	0	0	0	0
Basidiomycota	Agaricomycetes	Polyporales	Ganodermataceae	Ganoderma	NM	ITS1_01686	0	4	0	0	1	4	15	1	11	5	6	28	0	1	1	0	0	0	0	0	0	0	0	0	1	1	0	0	0	0	0	0	0	1	0	3	0	5	1	0	2	1	1
Ascomycota	Leotiomycetes	Leotiales	Leotiaceae	Leotia	NM	ITS1_01688	0	0	0	0	0	0	0	0	0	0	0	0	0	0	0	0	0	2	0	0	0	0	0	0	0	0	0	81	0	0	0	0	0	0	0	0	0	0	0	0	0	0	0
Basidiomycota	Agaricomycetes	Hymenochaetales	Hymenochaetaceae	Hymenochaete	NM	ITS1_01689	0	0	0	1	0	0	0	0	0	0	0	31	0	0	0	0	0	0	0	0	0	0	0	0	0	0	0	0	0	0	0	0	1	0	0	0	0	51	0	0	10	0	3
Basidiomycota	Agaricomycetes	Agaricales	Cortinariaceae	Cortinarius	EcM	ITS1_01691	0	0	0	0	0	0	0	0	0	0	0	0	0	0	0	0	0	51	0	0	2	0	1	0	0	0	1	7	1	0	0	0	0	0	0	0	0	0	0	0	0	0	0
Basidiomycota	Agaricomycetes	Russulales	Russulaceae	Lactarius	EcM	ITS1_01692	0	0	0	0	0	0	0	0	0	0	0	0	3	0	0	0	0	81	0	0	0	0	0	0	0	3	0	1	0	0	0	0	0	1	0	0	0	0	0	0	0	2	0
Basidiomycota	Agaricomycetes	Russulales	Russulaceae	Russula	EcM	ITS1_01693	0	0	0	0	0	0	0	0	0	0	0	0	0	0	0	0	0	2	0	55	26	0	0	0	0	0	0	1	0	0	0	0	0	0	0	0	0	0	0	0	0	0	0
Basidiomycota	Agaricomycetes	Thelephorales	Thelephoraceae		EcM	ITS1_01694	0	0	0	0	0	0	0	0	0	0	0	95	0	1	1	0	0	0	0	0	0	0	0	0	0	0	0	0	0	0	0	0	0	0	0	0	0	0	0	0	0	0	0
Basidiomycota	Agaricomycetes	Agaricales	Hygrophoraceae	Hygrocybe	NM	ITS1_01695	2	0	0	0	0	0	79	0	0	0	1	0	0	1	0	0	0	0	0	0	0	0	0	0	0	0	0	0	0	0	0	0	0	0	0	14	0	0	0	0	0	0	0
Basidiomycota	Agaricomycetes	Thelephorales	Thelephoraceae	Tomentella	EcM	ITS1_01696	0	0	0	17	0	0	0	0	0	0	0	0	0	0	0	0	0	29	0	0	0	0	0	0	0	12	0	39	0	0	0	0	0	0	0	0	0	0	0	0	0	0	0
Basidiomycota	Agaricomycetes	Russulales	Russulaceae	Russula	EcM	ITS1_01697	0	0	0	0	0	0	0	0	0	0	0	0	1	0	0	0	0	0	0	0	0	0	0	0	0	0	0	0	0	0	0	0	0	2	0	0	0	0	0	0	1	93	0
Basidiomycota	Agaricomycetes	Agaricales	Clavariaceae	Clavaria	NM	ITS1_01700	0	0	0	0	0	1	0	0	0	0	0	0	0	0	0	0	0	0	58	0	1	0	0	0	0	0	0	0	0	0	0	0	0	0	0	0	0	0	0	0	0	0	0
Ascomycota	Eurotiomycetes	Eurotiales	Trichocomaceae	Penicillium	NM	ITS1_01701	0	0	0	0	0	1	0	0	0	0	0	0	9	0	0	1	5	0	0	1	0	73	1	0	5	0	0	0	0	0	0	0	0	0	0	0	0	0	0	0	0	0	0
Ascomycota	Leotiomycetes	Helotiales	Vibrisseaceae	Phialocephala	NM	ITS1_01702	0	0	0	0	0	0	0	0	0	0	0	0	0	0	0	0	0	0	1	0	0	0	0	0	0	0	0	0	25	0	0	0	0	0	0	0	0	0	0	0	0	1	0
Basidiomycota	Agaricomycetes	Cantharellales	Clavulinaceae	Clavulina	NM	ITS1_01705	0	0	0	0	0	0	0	0	20	0	0	0	0	0	0	0	0	0	0	0	0	0	0	0	0	0	0	0	0	0	0	0	0	0	0	0	0	76	0	0	0	0	0
Basidiomycota	Agaricomycetes	Agaricales			NM	ITS1_01706	0	0	0	0	0	0	0	0	0	0	0	0	0	0	0	0	0	1	71	0	0	0	0	1	0	0	0	0	0	0	0	0	0	0	0	0	0	0	0	0	0	0	0
Basidiomycota	Agaricomycetes	Trechisporales			NM	ITS1_01707	0	0	0	0	0	0	0	0	0	3	0	0	42	0	0	1	0	0	0	0	0	0	0	0	0	0	0	0	0	0	0	0	0	0	0	0	0	0	0	0	0	50	0
Basidiomycota	Agaricomycetes	Cantharellales	Ceratobasidiaceae	Ceratobasidium	NM	ITS1_01708	0	0	0	0	0	0	0	0	0	0	0	0	0	0	52	0	0	0	0	0	0	0	0	0	0	0	0	0	0	0	0	0	0	0	0	0	0	0	0	0	0	0	0
Basidiomycota	Agaricomycetes	Hymenochaetales			NM	ITS1_01709	0	0	1	0	0	0	0	0	0	0	0	0	0	0	0	0	1	1	93	0	0	0	0	0	0	0	0	0	0	0	0	0	0	0	0	0	0	0	0	0	0	0	0
Basidiomycota	Agaricomycetes	Cantharellales		Minimedusa	NM	ITS1_01710	0	0	0	0	0	0	0	0	0	0	0	0	0	0	0	0	0	0	0	0	0	30	5	10	13	24	0	0	0	0	0	0	0	0	0	0	0	0	0	0	0	0	0
Basidiomycota	Agaricomycetes	Russulales	Russulaceae	Russula	EcM	ITS1_01711	0	0	0	0	0	0	0	0	0	0	0	0	0	0	0	0	83	9	0	0	0	0	0	0	0	2	1	0	1	0	0	0	0	0	0	0	0	0	0	0	0	0	0
Basidiomycota	Agaricomycetes	Russulales	Russulaceae		EcM	ITS1_01713	0	0	0	0	0	0	0	0	0	0	0	0	0	0	0	0	0	95	0	0	0	0	0	0	0	0	0	0	0	0	0	0	0	0	0	0	0	0	0	0	0	0	0
Basidiomycota	Agaricomycetes	Sebacinales	Sebacinaceae		NM	ITS1_01715	0	0	0	0	0	1	0	0	0	0	0	0	0	0	0	0	0	0	0	0	0	2	60	0	0	0	0	0	0	0	0	0	0	0	0	0	0	0	0	0	0	0	0
Basidiomycota	Agaricomycetes	Sebacinales	Sebacinaceae		EcM	ITS1_01716	0	0	0	0	29	17	0	1	0	0	0	0	0	0	0	0	0	0	0	0	0	0	0	0	0	0	6	0	0	0	0	0	0	17	6	0	0	0	0	0	0	0	0
Ascomycota	Eurotiomycetes	Chaetothyriales	Herpotrichiellaceae	Cladophialophora	NM	ITS1_01717	0	0	0	0	0	0	0	0	0	0	0	73	0	0	0	0	0	0	0	0	0	0	0	0	0	0	0	0	0	0	0	0	0	0	0	0	0	0	0	0	20	0	1
Ascomycota	Leotiomycetes	Helotiales	Dermateaceae		NM	ITS1_01718	0	0	0	0	0	0	0	0	0	0	0	0	0	0	0	0	2	1	0	0	0	2	23	1	0	0	1	57	1	0	0	0	0	0	0	0	0	0	0	0	1	0	0
Basidiomycota	Agaricomycetes	Agaricales	Cortinariaceae	Cortinarius	EcM	ITS1_01721	0	0	0	0	0	0	0	0	0	0	0	0	0	0	0	0	0	0	0	0	83	0	0	0	0	0	0	0	0	0	0	0	0	0	0	0	0	0	0	0	0	0	0
Basidiomycota	Agaricomycetes	Agaricales	Cortinariaceae	Cortinarius	EcM	ITS1_01722	0	0	0	0	0	0	0	0	0	0	0	0	0	0	0	0	0	0	0	0	68	0	2	0	0	0	0	0	0	0	0	0	0	0	0	0	0	0	0	0	0	0	0
Basidiomycota	Agaricomycetes				NM	ITS1_01723	1	0	0	0	0	0	0	0	0	0	0	0	0	0	1	50	2	0	0	0	0	0	0	0	0	0	0	0	0	0	0	0	0	0	0	0	0	0	0	0	0	0	0
Basidiomycota	Agaricomycetes	Agaricales	Tricholomataceae	Tricholoma	EcM	ITS1_01724	0	0	0	0	0	0	0	0	0	0	0	0	0	0	0	0	0	6	0	0	0	0	10	0	0	15	19	4	0	0	0	0	0	0	0	0	0	0	0	0	0	0	0
Basal lineages	Fungi_other				NM	ITS1_01725	0	0	0	0	0	1	0	0	0	0	9	21	1	0	0	0	0	0	0	0	0	0	0	0	0	0	0	0	0	0	0	0	0	0	0	0	1	0	4	19	39	0	0
Mortierellomycota	Mortierellomycetes	Mortierellales	Mortierellaceae	Mortierella	NM	ITS1_01726	0	0	0	1	0	0	0	0	0	0	0	0	0	0	56	0	0	0	0	0	0	0	0	0	0	0	0	0	0	0	0	0	0	0	0	0	0	0	0	0	0	0	0
Basidiomycota	Agaricomycetes	Cantharellales	Clavulinaceae		EcM	ITS1_01727	0	0	0	0	0	0	0	0	0	0	0	0	0	0	0	0	0	0	0	0	2	0	0	0	0	0	0	0	0	0	0	1	0	0	0	0	0	0	0	0	0	0	0
Basidiomycota	Agaricomycetes	Thelephorales	Thelephoraceae		EcM	ITS1_01728	56	0	0	1	12	12	0	0	0	0	0	0	0	0	1	0	0	0	0	0	0	0	0	0	1	0	0	0	0	4	0	0	0	2	3	0	1	0	0	0	0	0	0
Basidiomycota	Agaricomycetes	Thelephorales	Thelephoraceae		EcM	ITS1_01729	0	0	0	0	0	0	0	0	0	0	0	0	0	0	0	0	0	0	0	0	0	0	1	82	0	0	0	1	0	0	0	0	0	0	0	0	0	0	0	0	0	0	0
Basidiomycota	Agaricomycetes	Thelephorales	Thelephoraceae		EcM	ITS1_01731	0	0	0	0	30	34	0	8	0	1	0	0	0	0	0	0	0	0	0	0	0	0	0	1	0	0	0	0	0	0	0	0	0	12	0	0	7	0	0	0	0	0	1
Basidiomycota	Agaricomycetes	Sebacinales	Serendipitaceae		NM	ITS1_01732	0	0	0	0	0	0	0	0	0	0	0	0	0	0	0	0	0	0	70	0	0	0	0	0	0	0	0	0	0	0	0	0	0	0	0	0	0	0	0	0	0	0	0
Basidiomycota	Agaricomycetes				NM	ITS1_01736	0	0	0	0	0	0	0	0	0	0	0	0	0	0	0	0	0	0	0	0	0	0	0	0	0	0	0	0	0	0	0	0	0	0	0	0	0	92	0	0	0	0	0
Basidiomycota	Agaricomycetes	Agaricales	Marasmiaceae	Marasmius	NM	ITS1_01737	0	0	0	0	0	0	0	0	0	32	0	0	5	0	2	0	0	0	0	0	0	0	0	0	0	0	0	0	0	0	0	0	0	0	0	0	0	0	52	0	0	2	0
Basidiomycota	Agaricomycetes	Russulales	Russulaceae	Russula	EcM	ITS1_01738	0	0	0	67	0	0	0	0	0	0	0	0	0	0	0	0	0	0	0	0	0	0	0	0	0	0	0	0	0	0	0	0	27	0	0	0	0	0	0	0	0	0	0
Ascomycota	Fungi_other				NM	ITS1_01739	10	43	13	8	12	3	0	0	0	0	0	0	0	0	0	0	0	0	0	0	0	0	0	5	0	0	0	0	0	0	0	0	0	0	0	0	0	0	0	0	0	0	0
Basidiomycota	Agaricomycetes	Thelephorales	Thelephoraceae	Tomentella	EcM	ITS1_01741	0	0	0	5	0	0	0	0	0	0	0	0	0	0	0	0	2	0	0	0	0	0	0	1	0	34	5	36	0	0	0	0	0	0	0	0	0	0	0	0	0	0	0
Ascomycota	Eurotiomycetes	Eurotiales	Trichocomaceae	Penicillium	NM	ITS1_01742	13	6	0	17	6	6	9	0	4	0	2	0	0	0	0	0	0	0	0	0	0	0	0	2	3	0	0	0	0	5	1	0	5	2	1	4	0	1	2	0	0	0	0
Basidiomycota	Agaricomycetes	Agaricales	Inocybaceae	Inocybe	EcM	ITS1_01744	0	0	0	0	0	0	0	0	0	0	0	0	0	0	0	0	0	0	0	0	0	0	0	0	0	0	0	0	44	0	0	0	0	0	0	0	0	0	0	0	0	0	0
Basidiomycota	Agaricomycetes	Agaricales	Cortinariaceae	Cortinarius	EcM	ITS1_01746	0	0	0	0	0	0	0	0	0	0	0	0	0	0	0	0	0	0	0	0	0	0	5	0	0	0	0	0	0	0	0	0	0	0	0	0	0	0	0	0	0	0	0
Basidiomycota	Agaricomycetes	Agaricales	Entolomataceae	Clitopilus	NM	ITS1_01747	0	0	0	1	0	0	13	0	2	0	0	0	0	0	0	0	0	0	0	0	0	0	0	0	0	0	0	0	0	0	0	0	0	0	0	48	1	27	0	0	0	0	0
Basidiomycota	Agaricomycetes	Thelephorales	Thelephoraceae		EcM	ITS1_01748	0	0	0	5	0	0	0	0	0	0	0	0	0	0	0	0	0	0	0	0	0	13	42	0	0	0	1	0	0	0	0	0	0	0	0	0	0	0	0	0	0	0	0
Ascomycota	Eurotiomycetes	Chaetothyriales	Herpotrichiellaceae		NM	ITS1_01749	0	0	0	0	1	0	2	0	0	0	0	0	0	86	0	0	0	0	0	0	0	0	0	0	0	0	0	0	0	0	0	0	0	0	0	0	1	0	0	0	0	0	3
Basidiomycota	Agaricomycetes	Thelephorales	Thelephoraceae	Tomentella	EcM	ITS1_01750	0	0	0	0	0	0	0	0	0	0	0	0	0	0	0	0	0	69	0	0	1	0	0	0	0	5	4	9	0	0	0	0	0	0	0	0	0	0	0	0	0	0	0
Basidiomycota	Agaricomycetes	Russulales	Russulaceae	Russula	EcM	ITS1_01751	0	0	0	93	0	0	0	0	0	0	0	0	0	0	0	0	0	0	0	0	0	0	0	0	0	0	0	0	0	0	0	0	0	0	0	0	0	0	0	0	0	0	0
Ascomycota	Eurotiomycetes	Onygenales			NM	ITS1_01754	0	0	0	1	0	0	88	0	0	1	0	0	0	0	0	0	0	0	0	0	0	0	0	0	0	0	0	0	0	0	0	0	0	0	0	2	0	0	0	0	0	0	0
Ascomycota	Leotiomycetes	Helotiales	Helotiaceae	Phaeohelotium	NM	ITS1_01756	18	0	0	0	14	10	0	0	0	0	0	0	0	0	0	0	0	0	0	0	0	0	0	0	0	0	0	0	0	15	0	1	0	25	6	1	0	0	0	0	0	0	0
Basidiomycota	Fungi_other				NM	ITS1_01757	0	0	0	0	0	0	10	0	0	0	0	0	0	0	0	0	0	0	0	0	0	0	0	0	0	0	0	0	0	0	0	0	0	0	0	82	0	0	0	0	0	0	0
Basidiomycota	Agaricomycetes				NM	ITS1_01760	0	0	0	0	0	0	0	0	0	0	0	0	0	0	0	0	0	0	0	0	54	0	0	0	0	0	0	0	0	0	0	0	0	0	0	0	0	0	0	0	0	0	0
Ascomycota	Eurotiomycetes	Eurotiales	Trichocomaceae	Penicillium	NM	ITS1_01762	0	0	0	0	0	0	0	0	0	0	0	0	1	0	0	0	61	0	2	0	0	10	1	0	2	0	0	0	0	0	0	0	0	0	0	0	0	0	0	0	0	0	0
Basidiomycota	Agaricomycetes	Thelephorales	Thelephoraceae		EcM	ITS1_01763	0	0	0	0	0	0	0	0	0	0	0	0	0	0	0	0	0	0	0	0	0	0	0	0	0	0	0	66	0	0	0	0	0	0	0	0	0	0	0	0	0	0	0
Ascomycota	Sordariomycetes	Hypocreales	Hypocreaceae	Hypocrea	NM	ITS1_01764	0	0	0	0	0	0	0	0	0	0	0	0	26	0	0	0	51	0	0	10	5	0	0	0	0	0	0	0	0	0	0	0	0	0	0	0	0	0	0	0	0	0	0
Basidiomycota	Agaricomycetes	Hymenochaetales	Hymenochaetaceae	Coltriciella	EcM	ITS1_01765	0	0	0	0	0	0	0	0	2	0	0	0	0	0	0	0	0	0	0	0	0	0	0	0	0	0	0	0	0	0	0	0	0	0	0	0	0	88	0	0	1	0	0
Basidiomycota	Agaricomycetes	Thelephorales	Thelephoraceae	Tomentella	EcM	ITS1_01766	0	0	0	0	0	0	0	0	0	33	11	10	22	0	0	1	0	0	0	0	0	0	0	0	0	0	0	0	0	0	0	0	0	0	0	0	0	0	4	1	2	5	0
Basidiomycota	Agaricomycetes	Thelephorales	Thelephoraceae		EcM	ITS1_01767	0	0	0	0	0	0	0	0	0	0	0	0	0	0	0	0	0	0	0	0	0	0	0	0	0	0	0	0	67	0	0	0	0	0	0	0	0	0	0	0	0	0	0
Ascomycota	Eurotiomycetes	Chaetothyriales	Herpotrichiellaceae	Cladophialophora	NM	ITS1_01768	0	0	0	0	0	0	0	0	0	0	0	0	0	0	0	0	19	13	0	0	0	7	9	0	0	2	24	13	1	0	0	0	0	0	0	0	0	0	0	0	0	0	0
Ascomycota	Leotiomycetes	Helotiales			NM	ITS1_01769	0	0	0	0	0	0	0	0	0	0	0	0	1	0	0	1	0	0	28	0	0	0	0	0	0	2	1	0	2	0	0	0	0	0	0	0	0	0	0	0	0	5	0
Basidiomycota	Agaricomycetes	Agaricales	Agaricaceae	Leucocoprinus	NM	ITS1_01770	14	24	11	0	0	0	0	0	0	0	0	0	0	0	0	0	0	0	0	0	0	0	0	0	0	0	0	0	0	13	22	6	0	0	0	0	0	0	0	1	0	0	0
Ascomycota	Archaeorhizomycetes	Archaeorhizomycetales	Archaeorhizomycetaceae		NM	ITS1_01771	0	0	0	0	0	0	0	0	0	0	0	0	0	0	0	50	2	0	0	0	0	0	0	0	0	0	0	0	0	0	0	0	0	0	0	0	0	0	0	0	0	0	1
Basidiomycota	Agaricomycetes	Agaricales	Inocybaceae	Inocybe	EcM	ITS1_01772	0	0	0	0	0	0	0	0	0	0	0	0	0	0	0	0	0	1	0	0	0	0	0	0	0	0	0	0	54	0	0	0	0	0	0	0	0	0	0	0	0	0	0
Basidiomycota	Agaricomycetes	Agaricales	Agaricaceae	Leucoagaricus	NM	ITS1_01773	0	0	0	0	0	0	0	0	11	0	0	1	0	7	0	2	0	0	0	0	0	0	0	0	0	0	0	0	0	0	0	0	0	0	0	0	0	57	0	0	0	0	13
Basidiomycota	Agaricomycetes	Agaricales	Tricholomataceae	Delicatula	NM	ITS1_01774	0	0	0	0	0	0	0	0	19	0	0	7	2	0	2	0	0	0	0	0	0	0	0	0	0	0	0	0	0	1	0	0	0	0	0	0	0	48	0	0	12	0	0
Basidiomycota	Agaricomycetes	Agaricales	Cortinariaceae	Cortinarius	EcM	ITS1_01775	0	0	0	0	0	0	0	0	0	0	0	0	0	0	0	0	0	0	0	77	6	0	0	0	0	0	0	0	0	0	0	0	0	0	0	0	0	0	0	0	0	0	0
Basidiomycota	Agaricomycetes	Boletales	Boletaceae		EcM	ITS1_01776	0	0	0	0	0	0	12	0	0	0	0	26	0	0	0	0	0	0	0	0	0	0	0	0	0	0	0	18	0	0	0	0	0	0	0	0	0	0	0	0	25	0	0
Basidiomycota	Agaricomycetes	Russulales	Russulaceae	Russula	EcM	ITS1_01777	0	0	0	0	39	28	0	0	1	0	0	0	0	0	0	0	0	1	0	0	0	0	0	0	0	0	0	1	1	0	0	0	0	17	3	0	0	0	0	0	0	0	0
Basidiomycota	Agaricomycetes	Thelephorales	Thelephoraceae		EcM	ITS1_01778	0	0	0	0	0	0	0	0	0	0	0	0	0	0	0	0	0	0	0	0	0	0	0	77	0	0	0	1	0	0	0	0	0	0	0	0	0	0	0	0	0	0	0
Ascomycota	Eurotiomycetes	Chaetothyriales			NM	ITS1_01779	0	0	0	24	0	0	0	0	0	0	0	0	0	0	0	0	0	0	1	0	0	0	0	0	1	1	1	41	0	0	0	0	5	0	0	0	0	0	0	0	0	0	0
Basidiomycota	Agaricomycetes	Thelephorales	Thelephoraceae	Tomentella	EcM	ITS1_01780	0	0	0	0	0	0	0	0	0	0	0	0	0	0	0	0	0	0	0	0	0	0	0	0	0	0	0	0	91	0	0	0	0	0	0	0	0	0	0	0	0	0	0
Ascomycota	Eurotiomycetes	Chaetothyriales	Herpotrichiellaceae		NM	ITS1_01781	0	1	0	0	0	0	0	0	0	0	0	0	0	0	0	0	0	0	0	0	0	0	0	0	0	0	0	0	0	0	49	32	8	0	0	0	0	0	0	0	0	0	0
Basidiomycota	Agaricomycetes	Agaricales	Clavariaceae		NM	ITS1_01782	0	0	0	0	0	0	0	0	0	0	0	0	0	0	1	64	0	0	1	0	0	1	5	0	0	0	0	4	0	0	0	0	0	0	0	0	0	0	0	0	0	0	0
Ascomycota	Eurotiomycetes	Chaetothyriales	Herpotrichiellaceae	Cladophialophora	NM	ITS1_01783	0	0	0	0	0	0	0	0	0	0	0	0	0	0	0	0	0	0	0	0	0	0	0	0	0	0	0	1	89	0	0	0	0	0	0	0	0	0	0	0	0	0	0
Ascomycota	Lecanoromycetes	Peltigerales	Peltigeraceae	Peltigera	NM	ITS1_01784	0	0	0	0	0	0	0	0	0	0	0	0	0	0	0	0	0	0	0	0	0	0	0	0	0	0	0	0	87	0	0	0	0	0	0	0	0	0	0	0	0	0	0
Basidiomycota	Agaricomycetes	Cantharellales	Ceratobasidiaceae	Ceratobasidium	NM	ITS1_01785	0	0	0	0	0	0	0	0	0	0	0	0	0	0	0	71	0	0	0	0	0	0	0	0	0	0	0	0	0	0	0	0	0	0	0	0	0	0	0	0	0	0	1
Ascomycota	Dothideomycetes	Venturiales			NM	ITS1_01786	0	0	0	0	0	1	1	84	0	1	0	0	0	0	0	0	0	0	0	0	0	0	0	0	0	0	0	0	0	0	0	0	0	0	0	0	4	0	0	0	0	0	0
Ascomycota	Eurotiomycetes	Eurotiales	Trichocomaceae	Penicillium	NM	ITS1_01787	0	0	0	0	0	0	33	0	0	0	0	0	0	0	0	0	32	0	0	0	0	0	0	0	0	0	0	0	0	0	0	0	0	0	0	18	0	0	1	0	0	0	0
Basidiomycota	Agaricomycetes	Polyporales	Ganodermataceae	Ganoderma	NM	ITS1_01789	0	4	1	2	0	0	0	0	9	0	0	0	0	0	0	0	0	0	0	0	0	1	0	0	0	50	2	1	0	0	2	0	0	0	0	0	0	0	0	0	0	0	0
Basidiomycota	Agaricomycetes	Agaricales	Inocybaceae	Inocybe	EcM	ITS1_01791	1	0	0	0	0	0	0	0	0	0	0	0	0	0	85	0	0	0	0	0	0	0	0	0	0	0	0	0	0	1	0	0	0	0	0	0	0	0	0	0	0	0	0
Basidiomycota	Agaricomycetes	Agaricales	Inocybaceae	Inocybe	EcM	ITS1_01792	0	0	0	2	20	13	0	0	0	0	0	0	0	0	0	0	0	0	0	0	0	0	0	0	0	0	0	0	0	0	0	0	0	46	9	0	0	0	0	0	0	0	0
Basidiomycota	Agaricomycetes	Boletales	Boletaceae		EcM	ITS1_01793	0	0	0	89	0	0	0	0	0	0	0	0	0	0	0	0	0	0	0	0	0	0	0	0	0	0	0	0	0	0	0	0	1	0	0	0	0	0	0	0	0	0	0
Basidiomycota	Agaricomycetes	Thelephorales	Thelephoraceae		EcM	ITS1_01794	0	0	0	0	0	0	0	0	0	0	0	0	0	0	0	0	15	4	0	0	0	44	0	0	0	9	2	2	1	0	0	0	0	0	0	0	0	0	0	0	0	0	0
Basidiomycota	Agaricomycetes	Cantharellales	Clavulinaceae		EcM	ITS1_01795	0	0	0	0	0	0	0	0	0	0	0	0	0	0	0	0	0	0	0	85	0	0	0	0	0	0	0	0	0	0	0	0	0	0	0	0	0	0	0	0	0	0	0
Basidiomycota	Agaricomycetes	Thelephorales	Thelephoraceae	Tomentella	EcM	ITS1_01796	41	0	0	0	14	9	0	0	0	0	0	1	0	1	0	0	1	0	0	0	0	0	0	0	0	0	0	1	0	14	0	0	0	6	1	0	0	0	0	0	0	0	1
Basidiomycota	Agaricomycetes	Russulales	Russulaceae	Russula	EcM	ITS1_01797	0	0	0	0	0	0	0	0	0	0	0	0	0	0	0	0	0	0	0	0	0	0	1	0	0	0	0	85	1	0	0	0	0	0	0	0	0	0	0	0	0	0	0
Ascomycota	Leotiomycetes				NM	ITS1_01798	0	0	0	0	0	0	0	0	0	0	0	0	0	0	0	3	0	0	58	0	0	0	0	0	0	0	1	1	0	0	0	0	0	0	0	0	0	0	0	0	0	0	0
Ascomycota	Pezizomycetes				NM	ITS1_01801	0	0	0	0	40	15	0	0	0	0	1	0	0	0	0	0	0	0	0	0	0	0	1	1	0	0	0	0	0	0	0	0	0	26	4	0	0	0	0	0	0	0	0
Ascomycota	Pezizomycetes	Pezizales	Tuberaceae	Tuber	EcM	ITS1_01802	0	0	0	51	0	0	0	0	0	0	0	0	1	0	0	0	1	1	0	0	0	0	0	0	0	3	3	0	0	0	0	0	25	0	0	0	0	0	0	0	0	0	0
Ascomycota	Pezizomycetes	Pezizales	Pyronemataceae		NM	ITS1_01803	0	0	0	0	0	0	0	0	0	0	0	0	0	0	0	0	0	1	0	0	0	0	0	0	0	0	1	61	0	0	0	0	0	0	0	0	0	0	0	0	0	0	0
Ascomycota	Eurotiomycetes				NM	ITS1_01804	0	0	0	0	0	0	0	0	0	0	0	0	0	0	0	0	7	0	0	0	0	0	1	0	20	0	0	0	0	0	0	0	0	0	0	0	0	0	0	0	0	0	0
Ascomycota	Dothideomycetes	Hysteriales	Gloniaceae	Cenococcum	EcM	ITS1_01806	0	0	0	0	0	0	0	0	0	0	0	0	0	0	0	0	0	0	0	0	0	0	0	0	0	0	1	0	0	0	0	0	0	0	0	0	0	0	0	0	0	0	0
Ascomycota	Eurotiomycetes	Eurotiales	Trichocomaceae	Aspergillus	NM	ITS1_01808	0	0	0	0	0	0	3	0	0	0	0	0	0	0	0	3	67	0	0	0	0	2	0	0	1	0	0	0	0	0	0	0	0	0	0	2	0	0	0	0	0	0	0
Ascomycota	Leotiomycetes	Helotiales			NM	ITS1_01809	0	0	0	0	0	0	0	0	0	0	0	0	0	0	0	26	0	0	0	0	1	0	0	0	0	0	0	0	0	0	0	0	0	0	0	0	0	0	1	0	0	0	0
Basidiomycota	Agaricomycetes	Agaricales	Cortinariaceae	Cortinarius	EcM	ITS1_01810	0	0	0	0	0	0	0	0	0	0	0	0	0	0	0	0	0	0	0	0	84	0	3	0	0	0	0	1	1	0	0	0	0	0	0	0	0	0	0	0	0	0	0
Ascomycota	Eurotiomycetes	Chaetothyriales			NM	ITS1_01811	11	0	0	0	5	6	6	1	2	0	0	0	0	5	6	0	0	0	0	0	0	15	0	4	1	7	19	1	0	0	0	0	0	0	0	0	0	0	0	0	0	0	0
Basidiomycota	Agaricomycetes	Agaricales			EcM	ITS1_01813	0	0	0	0	0	0	0	0	0	0	0	0	0	0	0	0	0	0	0	0	0	0	0	1	0	0	0	11	0	0	0	0	0	0	0	0	0	0	0	0	0	0	0
Basidiomycota	Agaricomycetes	Cantharellales	Clavulinaceae	Clavulina	EcM	ITS1_01817	0	0	0	0	0	0	0	5	0	0	0	0	0	0	0	0	0	0	0	78	0	0	1	0	0	0	0	1	0	0	0	0	0	0	0	0	2	0	0	0	0	0	0
Basidiomycota	Agaricomycetes	Agaricales	Marasmiaceae	Tetrapyrgos	NM	ITS1_01818	0	0	0	1	0	0	0	0	0	0	0	0	0	1	77	0	0	0	0	0	0	0	0	0	0	0	0	0	0	0	0	0	0	0	0	0	0	0	0	0	0	0	0
Basidiomycota	Agaricomycetes	Russulales	Russulaceae	Russula	EcM	ITS1_01819	0	0	0	0	0	0	0	0	0	0	0	0	0	0	0	0	0	89	0	0	0	0	0	0	0	0	0	0	0	0	0	0	0	0	0	0	0	0	0	0	0	0	0
Basidiomycota	Agaricomycetes	Russulales	Russulaceae	Lactarius	EcM	ITS1_01821	0	0	0	0	0	0	0	0	0	0	0	0	52	0	0	1	0	0	0	0	0	0	0	0	0	0	0	0	0	0	0	0	0	0	0	0	0	0	1	0	0	34	0
Basidiomycota	Agaricomycetes	Thelephorales	Thelephoraceae		EcM	ITS1_01822	0	0	0	1	0	0	0	0	0	36	0	0	2	0	14	0	0	0	0	0	0	0	0	0	0	0	0	0	0	0	0	0	0	0	0	0	0	0	26	1	1	2	0
Basidiomycota	Agaricomycetes	Agaricales	Inocybaceae	Inocybe	EcM	ITS1_01827	0	0	0	0	0	1	0	0	0	0	0	0	0	0	0	0	0	1	0	0	0	0	0	59	0	1	0	0	0	0	0	0	0	0	0	0	0	0	0	0	0	0	0
Basidiomycota	Agaricomycetes	Agaricales	Porotheleaceae		NM	ITS1_01828	0	0	0	0	23	27	0	0	0	0	0	0	0	0	0	0	0	0	1	1	0	0	0	0	1	0	0	0	0	0	0	0	0	23	10	0	0	0	0	0	0	0	0
Basidiomycota	Agaricomycetes	Sebacinales			NM	ITS1_01829	0	0	0	0	0	0	0	0	0	0	0	0	0	0	0	3	1	0	27	5	46	0	1	0	0	2	0	3	0	0	0	0	0	0	0	0	0	0	0	0	0	0	0
Basidiomycota	Agaricomycetes	Russulales	Russulaceae		EcM	ITS1_01830	0	0	0	0	0	0	0	0	0	0	0	0	0	0	0	0	0	10	0	0	0	0	0	39	0	0	0	39	0	0	0	0	0	0	0	0	0	0	0	0	0	0	0
Ascomycota	Eurotiomycetes	Chaetothyriales	Herpotrichiellaceae		NM	ITS1_01831	0	0	0	0	0	0	0	1	0	1	0	44	0	0	1	1	0	0	0	0	0	0	0	0	0	0	0	0	0	0	0	0	1	0	0	0	1	0	1	0	35	0	0
Ascomycota	Eurotiomycetes				NM	ITS1_01832	0	0	0	0	0	0	0	0	0	0	0	0	0	0	0	1	0	0	0	0	0	0	0	0	0	0	0	0	0	0	0	0	0	0	0	2	71	0	0	0	0	0	13
Ascomycota	Eurotiomycetes	Chaetothyriales	Herpotrichiellaceae		NM	ITS1_01834	5	0	0	0	0	0	0	0	0	0	0	0	0	0	0	3	6	2	0	0	0	4	7	0	20	3	14	1	0	0	0	0	0	0	0	0	0	0	0	0	0	0	0
Ascomycota	Leotiomycetes	Helotiales			NM	ITS1_01835	0	0	0	0	0	0	0	0	0	0	0	0	0	0	0	0	0	0	87	0	0	0	0	0	0	0	0	0	0	0	0	0	0	0	0	0	0	0	0	0	0	0	0
Basidiomycota	Agaricomycetes	Trechisporales			NM	ITS1_01837	0	0	0	1	1	0	6	0	0	0	0	0	0	0	59	1	0	0	0	0	0	0	0	0	0	0	0	0	0	0	0	0	0	0	0	0	0	0	0	0	0	0	0
Ascomycota	Leotiomycetes	Helotiales			NM	ITS1_01838	0	0	0	0	0	0	0	0	0	0	0	0	42	1	0	0	24	0	0	0	0	0	0	0	1	3	15	1	0	0	0	0	0	0	0	0	0	0	0	0	0	0	0
Basidiomycota	Fungi_other				NM	ITS1_01839	0	0	0	0	0	0	0	0	0	0	0	0	0	0	0	0	0	0	0	0	0	0	0	0	29	0	0	0	1	0	0	0	0	0	0	0	0	0	0	0	0	0	0
Chytridiomycota	Chytridiomycetes	Chytridiales			NM	ITS1_01840	1	0	0	0	1	1	15	0	0	0	0	0	0	25	0	0	0	0	0	0	0	0	0	1	0	0	0	0	0	0	0	0	0	0	0	20	4	0	0	0	0	0	16
Ascomycota	Sordariomycetes	Sordariales			NM	ITS1_01841	0	0	1	0	0	0	0	0	0	0	0	0	47	0	0	0	6	7	0	0	0	0	0	0	1	5	0	2	0	0	0	0	0	0	0	0	0	0	0	0	0	6	0
Basidiomycota	Agaricomycetes	Agaricales	Lycoperdaceae		NM	ITS1_01842	0	0	0	0	0	0	0	0	0	0	0	0	0	0	0	0	0	0	0	0	0	0	0	0	0	0	0	0	0	23	0	0	0	0	0	0	0	0	0	0	0	0	0
Basidiomycota	Agaricomycetes	Agaricales	Marasmiaceae	Marasmiellus	NM	ITS1_01844	0	0	0	0	0	0	0	0	0	0	0	1	0	0	84	0	0	0	0	0	0	0	0	0	0	0	0	0	0	0	0	0	0	0	0	0	0	0	0	0	0	0	0
Basidiomycota	Agaricomycetes	Russulales	Russulaceae	Russula	EcM	ITS1_01845	0	0	0	0	0	0	0	0	0	0	0	0	79	0	1	0	0	0	0	0	0	0	0	0	0	0	0	0	0	0	0	0	0	0	0	0	0	0	0	0	0	7	0
Basidiomycota	Agaricomycetes	Russulales	Russulaceae	Russula	EcM	ITS1_01846	0	0	0	0	0	0	0	0	0	0	0	0	0	0	0	0	0	0	0	0	0	0	0	0	0	0	0	0	0	0	0	0	1	64	18	0	0	0	0	0	0	0	0
Ascomycota	Sordariomycetes	Hypocreales	Hypocreaceae	Trichoderma	NM	ITS1_01847	13	1	0	1	2	1	3	2	1	0	0	0	0	0	0	0	31	0	0	0	0	10	2	0	3	1	16	0	0	0	0	0	0	0	0	0	0	0	0	0	0	0	0
Ascomycota	Dothideomycetes	Pleosporales	Sporormiaceae	Preussia	NM	ITS1_01848	0	0	0	0	0	0	0	41	0	0	0	0	0	2	0	0	0	0	0	0	0	0	0	0	0	0	0	0	0	0	0	0	0	1	0	0	40	0	0	0	0	0	1
Basidiomycota	Agaricomycetes	Russulales	Russulaceae	Russula	EcM	ITS1_01849	0	0	0	0	0	0	0	0	0	0	0	0	0	0	0	0	1	23	0	0	0	0	0	0	0	0	50	2	0	0	0	0	0	0	0	0	0	0	0	0	0	1	0
Basidiomycota	Agaricomycetes	Russulales	Russulaceae	Russula	EcM	ITS1_01850	0	0	0	0	0	0	0	0	0	0	0	0	0	0	0	0	0	81	0	0	0	0	0	0	0	0	0	0	0	0	0	0	0	0	0	0	0	0	0	0	0	0	0
Basidiomycota	Agaricomycetes	Sebacinales	Serendipitaceae		NM	ITS1_01852	0	0	0	0	0	0	0	0	0	0	0	0	0	0	0	0	0	0	73	0	0	0	0	0	0	0	0	0	0	0	0	0	0	0	0	0	0	0	0	0	0	0	0
Basidiomycota	Agaricomycetes	Polyporales	Xenasmataceae	Xenasmatella	NM	ITS1_01853	0	47	16	1	0	0	0	0	0	0	0	0	0	0	0	0	0	0	0	0	0	0	0	0	0	0	0	0	0	0	19	3	0	0	0	0	0	0	0	0	0	0	0
Basidiomycota	Agaricomycetes	Russulales	Russulaceae		EcM	ITS1_01854	0	0	0	40	0	0	0	0	0	0	0	0	0	0	0	0	0	0	0	0	0	0	0	0	0	0	0	0	0	0	0	0	44	0	0	0	0	0	0	0	0	1	0
Basidiomycota	Agaricomycetes	Sebacinales	Serendipitaceae		NM	ITS1_01855	0	0	0	0	0	0	0	0	0	0	0	0	0	0	0	0	0	0	61	0	0	0	1	0	0	0	0	0	0	0	0	0	0	0	0	0	0	0	0	0	0	0	0
Ascomycota	Leotiomycetes	Helotiales			NM	ITS1_01858	0	0	0	0	0	0	0	0	0	0	0	0	0	0	0	10	0	0	1	0	0	0	0	0	0	0	0	0	0	0	0	0	0	0	0	0	0	0	0	0	0	2	0
Basidiomycota	Agaricomycetes	Agaricales	Entolomataceae	Entoloma	NM	ITS1_01860	0	0	0	0	0	0	0	0	33	0	0	0	0	1	0	0	0	0	0	0	0	0	0	0	0	0	0	0	0	0	0	0	0	0	0	0	0	52	0	0	0	0	0
Basidiomycota	Agaricomycetes	Agaricales	Tricholomataceae		NM	ITS1_01861	0	0	0	0	0	0	0	0	0	0	4	36	1	0	1	1	0	0	0	0	0	0	0	0	0	0	0	0	0	0	0	0	1	0	0	1	0	0	1	2	36	0	0
Basidiomycota	Agaricomycetes	Agaricales	Strophariaceae	Gymnopilus	NM	ITS1_01862	0	4	0	0	2	2	2	0	1	1	1	4	1	12	10	0	0	0	0	0	0	0	0	0	1	0	0	0	0	0	6	0	5	0	0	0	0	3	4	0	2	2	11
Basidiomycota	Agaricomycetes	Agaricales	Cortinariaceae	Cortinarius	EcM	ITS1_01863	0	0	0	0	0	0	0	0	0	0	0	0	0	0	0	0	2	72	0	0	0	0	0	0	0	12	0	0	0	0	0	0	0	0	0	0	0	0	0	0	0	0	0
Basidiomycota	Agaricomycetes	Russulales	Russulaceae		EcM	ITS1_01864	0	0	0	0	0	0	0	0	0	0	30	4	2	0	0	0	0	0	0	0	0	0	0	0	0	0	0	0	0	0	0	0	0	0	0	0	0	0	2	41	4	3	0
Basidiomycota	Agaricomycetes	Thelephorales	Thelephoraceae	Tomentella	EcM	ITS1_01865	0	0	0	1	0	0	0	19	1	0	0	0	0	0	0	0	0	0	0	0	0	0	0	0	0	0	0	0	0	0	0	0	0	0	0	0	64	0	0	0	0	0	0
Basidiomycota	Agaricomycetes	Sebacinales	Sebacinaceae		NM	ITS1_01866	0	0	0	0	0	0	0	0	0	0	0	0	0	78	0	0	0	0	0	0	0	0	0	0	0	0	0	0	0	0	0	0	0	0	0	0	0	0	0	0	0	0	8
Ascomycota	Eurotiomycetes	Eurotiales	Trichocomaceae	Penicillium	NM	ITS1_01867	0	0	0	0	0	0	0	0	0	0	0	0	2	0	0	0	1	0	0	1	0	72	0	1	2	0	0	0	0	0	0	0	0	0	0	0	0	0	0	0	0	0	0
Ascomycota	Leotiomycetes				NM	ITS1_01868	0	0	0	0	0	0	0	0	0	0	0	0	0	0	0	0	0	0	71	0	0	0	0	0	0	0	0	0	0	0	0	0	0	0	0	0	0	0	0	0	0	0	0
Basidiomycota	Agaricomycetes	Agaricales	Amanitaceae	Amanita	EcM	ITS1_01869	0	0	0	0	0	0	0	0	0	0	0	0	0	0	0	0	0	0	0	69	0	0	0	0	0	0	0	0	0	0	0	0	0	0	0	0	0	0	0	0	0	0	0
Basidiomycota	Agaricomycetes	Cantharellales	Clavulinaceae	Clavulina	EcM	ITS1_01870	0	0	0	0	0	0	0	0	0	0	0	0	0	0	0	0	0	0	0	0	0	0	59	0	0	1	0	0	0	0	0	0	0	0	0	0	0	0	0	0	0	0	0
Basidiomycota	Agaricomycetes	Russulales	Russulaceae		EcM	ITS1_01871	1	0	0	2	1	0	41	0	0	0	0	0	2	0	0	0	0	0	0	0	0	0	0	0	0	0	0	0	0	0	0	0	1	0	0	36	0	0	0	0	0	1	0
Ascomycota	Eurotiomycetes				NM	ITS1_01873	0	0	0	0	0	0	0	36	0	0	0	0	0	0	0	1	0	0	0	0	0	0	0	0	0	0	0	0	0	0	0	0	0	0	0	0	47	0	0	0	0	0	0
Ascomycota	Pezizomycetes				NM	ITS1_01876	0	0	0	0	0	0	0	0	0	0	0	0	0	0	0	0	0	2	0	0	0	0	0	0	0	0	16	0	0	0	0	0	0	0	0	0	0	0	0	0	0	0	1
Basidiomycota	Agaricomycetes	Agaricales	Cortinariaceae	Cortinarius	EcM	ITS1_01877	0	0	0	0	0	0	0	0	0	0	0	0	0	0	0	0	0	0	0	0	0	0	3	0	0	0	0	0	0	0	0	0	0	0	0	0	0	0	0	0	0	0	0
Basidiomycota	Agaricomycetes	Boletales	Coniophoraceae	Coniophora	NM	ITS1_01878	12	10	1	1	0	0	0	0	15	2	3	10	0	0	0	0	0	0	0	0	0	0	0	0	0	0	0	0	0	2	1	0	4	0	0	0	0	19	1	2	1	0	0
Ascomycota	Sordariomycetes	Hypocreales	Hypocreaceae		NM	ITS1_01879	0	21	7	0	3	2	0	0	0	0	0	0	0	0	0	0	8	7	0	0	0	2	1	2	19	10	3	0	0	0	0	0	0	0	0	0	0	0	0	0	0	0	0
Basidiomycota	Agaricomycetes	Thelephorales	Thelephoraceae		EcM	ITS1_01880	0	0	0	0	1	0	0	56	0	0	0	0	0	0	0	0	0	0	0	0	0	0	0	0	0	0	0	0	0	0	0	0	0	0	0	0	26	0	0	0	0	0	1
Ascomycota	Eurotiomycetes	Chaetothyriales	Herpotrichiellaceae		NM	ITS1_01881	0	0	0	0	0	0	0	0	0	0	0	0	0	0	0	0	0	0	0	0	0	0	0	0	0	0	0	0	0	0	0	0	0	1	0	2	81	0	0	0	0	0	0
Basidiomycota	Agaricomycetes	Thelephorales	Thelephoraceae		EcM	ITS1_01882	0	0	0	0	0	0	0	0	0	0	0	0	0	0	0	0	0	0	0	0	0	0	0	0	0	0	0	2	73	0	0	0	0	0	0	0	0	0	0	0	0	0	0
Basidiomycota	Agaricomycetes	Thelephorales	Thelephoraceae		EcM	ITS1_01883	0	0	0	0	0	0	0	0	0	0	0	0	0	0	0	0	0	0	0	0	0	0	0	0	0	0	0	1	61	0	0	1	0	0	0	0	0	0	0	0	0	0	0
Ascomycota	Leotiomycetes	Leotiales		Leohumicola	NM	ITS1_01885	0	0	0	0	0	0	0	0	0	0	0	0	0	0	0	0	0	0	83	0	0	0	0	0	1	0	0	0	0	0	0	0	0	0	0	0	0	0	0	0	0	0	0
Ascomycota	Leotiomycetes	Helotiales			NM	ITS1_01886	0	0	0	0	0	0	0	0	0	0	0	0	4	0	0	0	2	0	0	0	0	0	0	0	0	0	3	0	0	1	0	0	0	0	0	0	1	0	0	0	0	30	0
Ascomycota	Eurotiomycetes	Eurotiales	Trichocomaceae	Penicillium	NM	ITS1_01887	0	0	0	0	0	0	0	0	0	0	0	0	1	0	0	0	0	0	0	0	0	0	0	1	0	0	0	0	0	0	0	0	0	0	0	0	0	0	0	1	0	1	0
Ascomycota	Eurotiomycetes	Eurotiales	Trichocomaceae	Penicillium	NM	ITS1_01888	0	0	0	0	0	0	0	0	0	0	0	0	5	0	0	0	0	0	0	0	0	0	0	0	0	0	0	0	0	0	1	0	2	1	0	1	1	0	3	0	0	59	0
Ascomycota	Dothideomycetes				NM	ITS1_01889	0	0	0	0	0	0	0	0	0	0	0	0	0	0	0	0	0	0	0	0	0	0	0	0	0	0	0	0	0	0	1	0	0	15	3	0	0	65	0	0	0	0	0
Basidiomycota	Agaricomycetes	Agaricales	Hygrophoraceae	Hygrocybe	NM	ITS1_01891	0	0	0	0	0	0	0	0	0	1	0	0	0	0	0	68	0	0	0	0	0	0	0	0	0	0	0	0	0	0	0	0	0	0	0	0	0	0	0	0	0	0	0
Basidiomycota	Agaricomycetes	Agaricales	Cortinariaceae	Cortinarius	EcM	ITS1_01892	0	0	0	0	0	0	0	0	0	0	0	0	0	0	0	0	0	1	0	0	0	0	82	0	1	0	0	0	0	0	0	0	0	0	0	0	0	0	0	0	0	0	0
Basidiomycota	Agaricomycetes	Russulales	Russulaceae	Russula	EcM	ITS1_01893	0	0	0	59	0	0	0	1	0	0	0	0	0	0	0	0	0	0	0	0	0	0	0	0	0	0	0	0	0	0	0	0	24	0	0	0	0	0	0	0	0	0	0
Basidiomycota	Agaricomycetes	Thelephorales	Thelephoraceae	Tomentella	EcM	ITS1_01894	0	0	0	0	0	0	0	45	0	0	0	0	0	0	0	0	0	0	0	0	0	0	0	0	0	0	0	0	0	0	0	0	0	0	0	0	39	0	0	0	0	0	0
Basidiomycota	Agaricomycetes	Sebacinales	Serendipitaceae		NM	ITS1_01895	0	0	0	0	0	0	0	0	0	0	0	0	0	0	0	0	0	1	1	0	3	2	77	0	0	0	0	0	0	0	0	0	0	0	0	0	0	0	0	0	0	0	0
Ascomycota	Eurotiomycetes	Chaetothyriales	Herpotrichiellaceae	Cladophialophora	NM	ITS1_01896	0	0	0	0	0	0	0	0	0	0	0	0	25	0	0	4	5	0	0	6	0	1	3	0	15	18	4	3	0	0	0	0	0	0	0	0	0	0	0	0	0	0	0
Basidiomycota	Agaricomycetes	Cantharellales	Ceratobasidiaceae		NM	ITS1_01897	1	0	0	0	10	3	4	1	0	0	15	1	1	19	26	1	0	0	0	0	0	2	0	0	0	0	0	0	0	0	0	0	0	0	0	0	0	0	0	0	0	0	0
Basidiomycota	Agaricomycetes	Atheliales	Atheliaceae		EcM	ITS1_01898	0	0	0	0	0	0	0	0	0	0	0	0	0	0	0	0	0	0	0	1	0	0	1	0	67	0	0	0	0	0	0	0	0	0	0	0	0	0	0	0	0	0	0
Basidiomycota	Agaricomycetes	Sebacinales	Serendipitaceae		NM	ITS1_01899	0	0	0	0	0	1	0	0	0	0	0	0	0	0	0	0	0	0	1	1	1	41	12	9	1	1	0	1	1	0	0	0	0	0	0	0	0	0	0	0	0	0	0
Ascomycota	Leotiomycetes	Helotiales			NM	ITS1_01900	0	0	0	0	0	0	0	0	0	0	0	0	0	0	0	0	0	0	81	0	0	0	0	0	1	0	0	0	0	0	0	0	0	0	0	0	0	0	0	0	0	0	0
Ascomycota	Eurotiomycetes	Chaetothyriales	Herpotrichiellaceae		NM	ITS1_01901	0	0	0	0	0	0	0	0	0	0	0	0	0	0	0	0	0	0	0	0	0	0	0	0	0	0	0	0	58	0	0	0	0	0	0	0	0	0	0	0	0	0	0
Ascomycota	Eurotiomycetes	Chaetothyriales	Herpotrichiellaceae		NM	ITS1_01902	0	0	0	0	0	0	0	0	0	0	0	0	0	0	0	73	0	0	0	0	0	0	0	0	0	0	0	0	0	0	0	0	0	0	0	0	1	0	0	0	0	0	0
Ascomycota	Leotiomycetes				NM	ITS1_01903	0	25	25	0	0	0	0	0	0	0	0	0	0	0	0	10	0	0	0	0	0	0	0	0	0	0	0	0	0	0	9	10	1	0	0	0	0	0	0	0	0	0	0
Basidiomycota	Agaricomycetes	Agaricales	Cortinariaceae	Cortinarius	EcM	ITS1_01905	0	0	0	0	0	0	0	0	0	0	0	0	0	0	0	0	0	2	0	1	78	0	0	0	0	0	0	1	0	0	0	0	0	0	0	0	0	0	0	0	0	0	0
Basidiomycota	Agaricomycetes	Thelephorales	Bankeraceae	Sarcodon	EcM	ITS1_01906	0	33	7	0	0	0	0	0	0	0	0	0	0	1	0	0	0	0	0	0	0	0	0	0	0	0	0	0	0	0	37	5	0	0	0	0	0	0	0	0	0	0	0
Basidiomycota	Agaricomycetes	Cantharellales	Ceratobasidiaceae		NM	ITS1_01907	0	66	12	0	0	0	0	0	0	0	0	0	0	1	0	0	0	0	0	0	0	0	1	0	0	0	0	0	0	0	3	0	0	0	0	0	0	0	0	0	0	0	0
Mucoromycota	Mucoromycetes	Mucorales	Mucoraceae	Mucor	NM	ITS1_01908	0	0	0	0	0	0	0	0	0	0	0	0	0	0	0	0	0	0	0	0	0	0	0	0	0	0	0	0	0	2	18	3	11	0	0	1	0	46	0	0	0	0	0
Basidiomycota	Agaricomycetes	Cantharellales	Ceratobasidiaceae		NM	ITS1_01909	0	0	0	0	0	0	0	0	0	0	0	2	0	0	46	0	0	0	0	0	0	0	0	0	0	0	0	0	0	0	0	0	0	0	0	0	0	0	0	0	0	0	0
Basidiomycota	Agaricomycetes	Thelephorales	Thelephoraceae	Tomentella	EcM	ITS1_01910	0	0	0	0	0	0	0	0	0	0	0	0	0	0	0	0	0	0	0	0	0	0	21	0	15	0	1	38	1	0	0	0	0	0	0	0	0	0	0	0	0	0	0
Basidiomycota	Agaricomycetes	Russulales	Russulaceae		EcM	ITS1_01911	0	0	0	0	0	0	0	0	0	0	0	0	0	0	0	0	0	13	0	0	0	0	0	0	0	0	0	69	1	0	0	0	0	0	0	0	0	0	0	0	0	0	0
Ascomycota	Fungi_other				NM	ITS1_01912	0	0	0	0	0	0	0	74	0	1	0	0	0	0	0	0	0	0	0	0	0	0	0	0	0	0	0	0	0	0	0	0	0	0	0	0	8	0	0	0	0	0	0
Basidiomycota	Agaricomycetes	Thelephorales	Thelephoraceae	Tomentella	EcM	ITS1_01913	0	2	0	36	0	0	0	0	0	0	0	0	0	0	0	0	0	14	0	0	0	0	0	0	0	8	0	0	0	0	0	0	19	0	0	0	0	0	0	0	0	0	0
Basidiomycota	Agaricomycetes	Thelephorales	Thelephoraceae		EcM	ITS1_01914	0	3	0	17	0	0	0	0	22	0	0	0	0	0	1	0	0	0	0	0	0	0	0	0	0	0	0	0	0	1	0	0	33	0	0	0	0	5	0	0	0	0	0
Ascomycota	Dothideomycetes	Pleosporales			NM	ITS1_01915	0	0	0	0	0	0	1	39	0	0	0	1	0	0	0	0	0	0	0	0	0	0	0	0	0	0	0	0	0	0	0	0	0	0	0	0	41	0	0	0	0	0	0
Mucoromycota	Mucoromycetes	Endogonales			NM	ITS1_01917	0	0	0	0	0	0	0	0	0	0	0	0	0	0	0	2	0	0	0	0	0	0	0	0	0	0	0	0	0	0	0	1	0	0	0	0	0	0	0	0	0	0	0
Ascomycota	Fungi_other				NM	ITS1_01918	0	0	0	0	0	0	0	0	0	0	0	0	0	0	0	0	0	0	0	0	0	0	0	0	0	0	0	0	16	0	0	0	0	0	0	0	0	0	0	0	0	0	0
Basidiomycota	Agaricomycetes	Cantharellales	Cantharellaceae	Craterellus	EcM	ITS1_01921	0	0	0	0	0	0	0	0	0	0	0	0	0	0	0	0	0	0	0	0	0	0	0	0	12	34	0	36	0	0	0	0	0	0	0	0	0	0	0	0	0	0	0
Basidiomycota	Agaricomycetes	Russulales	Stephanosporaceae	Stephanospora	NM	ITS1_01922	0	15	16	0	0	0	0	0	0	0	0	0	0	0	0	0	0	0	1	0	0	0	1	0	0	0	0	0	0	0	31	13	0	0	0	0	1	0	0	0	1	0	0
Basidiomycota	Agaricomycetes	Agaricales	Marasmiaceae	Hydropus	NM	ITS1_01923	0	2	5	27	0	0	0	0	0	0	0	0	0	0	0	0	0	0	0	0	1	0	0	0	0	0	0	0	0	8	15	0	24	0	0	0	0	0	0	0	0	0	0
Basidiomycota	Agaricomycetes	Agaricales			EcM	ITS1_01925	0	0	0	0	0	0	0	0	0	0	0	0	0	0	0	0	1	0	0	0	0	0	2	0	0	11	27	1	1	0	0	0	0	0	0	0	0	0	0	0	0	0	0
Basidiomycota	Agaricomycetes	Agaricales			EcM	ITS1_01926	0	0	0	0	0	0	0	0	0	0	0	0	0	0	0	0	0	0	0	77	5	0	0	0	0	0	0	0	0	0	0	0	0	0	0	0	0	0	0	0	0	0	0
Basal lineages	Fungi_other				NM	ITS1_01927	0	0	0	0	0	0	0	0	0	3	23	38	1	0	0	0	0	0	0	0	0	0	0	0	0	0	0	0	0	0	0	0	0	0	0	0	0	0	8	3	5	1	0
Basidiomycota	Agaricomycetes	Corticiales	Corticiaceae		NM	ITS1_01928	1	54	22	2	0	0	0	1	0	0	0	0	0	0	1	0	0	0	1	0	0	0	0	0	0	0	0	0	0	0	0	0	0	0	0	0	0	0	0	0	0	0	0
Basidiomycota	Agaricomycetes	Thelephorales	Thelephoraceae		EcM	ITS1_01929	0	0	0	0	0	0	0	0	0	0	0	0	0	0	0	0	7	57	0	0	0	0	0	0	1	17	0	0	0	0	0	0	0	0	0	0	0	0	0	0	0	0	0
Ascomycota	Eurotiomycetes	Eurotiales	Thermoascaceae		NM	ITS1_01930	61	0	0	7	0	0	0	0	10	1	1	1	0	0	0	1	0	0	0	0	0	0	0	0	0	0	0	0	0	0	0	0	0	0	0	0	0	0	0	0	0	0	0
Basidiomycota	Agaricomycetes	Thelephorales	Thelephoraceae		EcM	ITS1_01931	0	0	0	0	0	0	0	0	0	0	0	0	0	0	0	0	0	81	1	0	0	0	0	0	0	0	0	0	0	0	0	0	0	0	0	0	0	0	0	0	0	0	0
Ascomycota	Leotiomycetes	Helotiales			NM	ITS1_01932	0	0	0	0	0	0	0	0	0	0	0	0	0	0	0	0	0	0	45	0	0	0	0	0	0	0	0	0	0	0	0	0	0	0	0	0	0	0	0	0	0	0	0
Ascomycota	Eurotiomycetes	Chaetothyriales			NM	ITS1_01935	0	0	0	0	0	0	0	0	0	0	0	0	0	0	0	0	0	1	71	0	0	0	0	0	0	0	0	0	0	0	0	0	0	0	0	0	0	0	0	0	0	0	0
Ascomycota	Eurotiomycetes	Chaetothyriales	Herpotrichiellaceae	Cladophialophora	NM	ITS1_01937	0	0	0	0	0	0	0	0	0	0	0	0	0	0	0	10	0	0	26	0	3	0	0	0	0	0	0	0	17	0	0	0	0	0	0	0	0	0	0	0	0	0	0
Ascomycota	Eurotiomycetes	Chaetothyriales	Herpotrichiellaceae		NM	ITS1_01938	0	0	0	0	0	0	0	0	0	0	0	1	0	0	0	0	0	0	0	0	0	0	0	0	0	0	0	0	0	1	0	0	0	0	0	0	1	0	9	3	58	8	0
Ascomycota	Eurotiomycetes	Chaetothyriales	Herpotrichiellaceae	Cladophialophora	NM	ITS1_01939	0	0	0	0	0	0	0	1	0	2	18	37	0	0	0	1	0	0	0	0	0	0	0	0	0	0	0	0	0	0	0	1	0	0	0	0	1	0	6	4	10	0	0
Ascomycota	Eurotiomycetes	Chaetothyriales	Herpotrichiellaceae		NM	ITS1_01940	0	0	0	0	0	0	0	1	0	0	0	0	0	0	0	0	0	0	0	0	0	0	0	0	0	0	0	0	0	0	0	0	0	0	0	0	80	0	0	0	0	0	0
Basidiomycota	Agaricomycetes	Agaricales	Hygrophoraceae	Hygrocybe	NM	ITS1_01941	0	0	0	0	0	0	0	0	0	0	0	0	0	0	0	0	0	0	0	0	35	0	0	0	0	0	0	0	0	0	0	0	0	0	0	0	0	0	0	0	0	0	0
Basidiomycota	Agaricomycetes	Polyporales			NM	ITS1_01942	0	0	0	0	0	0	0	0	0	0	0	0	1	0	80	0	0	0	0	0	0	0	0	0	0	0	0	0	0	0	0	0	0	0	0	0	0	0	0	0	0	0	0
Kickxellomycota	Kickxellomycetes	Kickxellales	Kickxellaceae	Ramicandelaber	NM	ITS1_01944	2	23	2	32	0	0	0	0	0	0	0	0	0	0	0	0	0	0	0	0	0	0	0	0	0	0	0	0	0	2	1	2	17	0	0	0	0	0	0	0	0	0	0
Basidiomycota	Agaricomycetes	Boletales	Boletaceae	Boletus	EcM	ITS1_01945	0	0	0	0	0	0	0	22	0	0	0	0	0	0	1	0	0	0	0	0	0	0	0	0	0	0	0	0	0	0	0	0	0	0	0	0	58	0	0	0	0	0	0
Basidiomycota	Agaricomycetes	Agaricales	Psathyrellaceae	Psathyrella	NM	ITS1_01946	0	0	0	0	0	0	0	0	0	0	0	0	43	0	1	1	0	0	0	0	0	0	0	0	0	0	0	0	0	0	0	0	0	0	0	0	0	0	0	0	0	34	0
Basidiomycota	Agaricomycetes	Agaricales	Entolomataceae	Entoloma	NM	ITS1_01947	0	0	0	0	0	0	39	1	0	1	0	0	0	0	0	0	0	0	0	0	0	0	0	0	0	0	0	0	0	0	0	0	1	0	0	39	0	0	0	0	0	0	0
Ascomycota	Leotiomycetes	Helotiales			NM	ITS1_01948	0	0	0	0	1	0	0	0	0	0	0	0	0	3	0	0	0	0	6	12	0	0	0	7	0	0	0	0	49	0	0	0	0	0	0	0	0	0	0	0	0	0	0
Basidiomycota	Fungi_other				EcM	ITS1_01949	0	0	0	0	0	0	0	0	0	0	0	0	0	0	0	0	0	0	1	0	0	0	0	50	0	0	0	0	0	0	0	0	0	0	0	0	0	0	1	0	0	0	0
Ascomycota	Eurotiomycetes	Chaetothyriales	Herpotrichiellaceae		NM	ITS1_01950	0	0	0	0	0	0	0	0	0	7	17	46	0	0	0	0	0	0	0	0	0	0	0	0	0	0	0	0	0	0	0	0	0	0	0	0	0	0	0	0	11	0	0
Ascomycota	Eurotiomycetes				NM	ITS1_01953	2	0	0	0	8	6	0	48	0	0	0	0	0	0	0	0	0	0	1	0	0	0	0	1	0	0	0	0	0	0	0	0	0	1	2	0	11	0	0	0	0	0	0
Basidiomycota	Agaricomycetes	Cantharellales	Clavulinaceae		EcM	ITS1_01954	0	0	0	0	0	0	0	0	0	0	0	0	0	0	0	0	0	0	0	0	0	0	0	0	0	0	0	0	0	0	0	0	80	0	0	0	0	0	0	0	0	0	0
Ascomycota	Eurotiomycetes	Chaetothyriales	Herpotrichiellaceae		NM	ITS1_01956	0	0	0	0	0	0	0	78	0	0	0	0	0	0	1	0	0	0	0	0	0	0	0	0	0	0	0	0	0	0	0	0	0	0	0	0	0	0	0	0	0	0	0
Ascomycota	Eurotiomycetes				NM	ITS1_01957	0	0	0	1	1	0	0	54	0	0	0	0	0	0	0	0	0	0	0	0	0	0	0	0	0	0	0	0	0	0	0	0	0	3	0	0	21	0	0	0	0	0	0
Ascomycota	Leotiomycetes	Helotiales			NM	ITS1_01958	0	0	0	0	0	0	0	0	0	0	0	0	0	0	0	0	0	0	0	0	80	0	0	0	0	0	0	0	0	0	0	0	0	0	0	0	0	0	0	0	0	0	0
Basidiomycota	Agaricomycetes	Sebacinales	Sebacinaceae		EcM	ITS1_01960	0	0	0	0	0	0	0	0	0	0	0	0	0	0	0	0	0	78	0	0	0	0	0	0	0	1	1	0	0	0	0	0	0	0	0	0	0	0	0	0	0	0	0
Basidiomycota	Agaricomycetes	Sebacinales	Sebacinaceae		EcM	ITS1_01961	0	0	0	0	0	0	0	0	0	0	0	0	0	0	0	0	1	0	1	4	73	0	1	0	0	0	0	0	0	0	0	0	0	0	0	0	0	0	0	0	0	0	0
Basidiomycota	Agaricomycetes	Agaricales	Clavariaceae		NM	ITS1_01962	0	0	0	0	0	0	0	0	0	0	0	0	0	0	0	0	0	0	0	0	52	0	0	0	0	1	0	0	0	0	0	0	0	0	0	0	0	0	0	0	0	0	0
Basidiomycota	Agaricomycetes	Boletales	Boletaceae	Phylloporus	EcM	ITS1_01963	0	0	0	0	0	0	0	0	0	0	0	0	0	0	0	0	0	0	0	0	0	0	11	0	0	0	0	28	0	0	0	0	0	0	0	0	0	0	0	0	0	0	0
Basidiomycota	Agaricomycetes	Cantharellales	Clavulinaceae	Clavulina	EcM	ITS1_01964	0	0	0	0	0	0	0	0	0	0	0	0	0	0	0	0	0	0	0	0	0	0	0	0	0	0	0	0	0	0	0	0	0	0	0	0	0	0	0	0	0	0	0
Basidiomycota	Agaricomycetes	Thelephorales	Bankeraceae	Boletopsis	EcM	ITS1_01965	0	0	0	0	0	0	0	0	0	0	0	0	0	0	0	0	0	1	0	0	0	0	0	0	0	46	0	0	0	0	0	0	0	0	0	0	0	0	0	0	0	0	0
Basidiomycota	Agaricomycetes	Agaricales	Clavariaceae	Clavaria	NM	ITS1_01966	0	0	0	0	0	0	0	0	0	0	0	0	0	0	0	2	1	39	0	0	0	0	1	0	0	0	0	7	1	0	0	0	0	0	0	0	0	0	0	0	0	0	0
Basidiomycota	Agaricomycetes	Thelephorales	Thelephoraceae		EcM	ITS1_01967	0	0	0	0	0	0	0	2	0	0	0	0	0	0	0	0	0	0	0	0	0	0	0	0	0	0	0	0	0	0	0	0	0	0	0	0	78	0	0	0	0	0	0
Basidiomycota	Agaricomycetes				NM	ITS1_01968	0	0	0	0	0	0	0	0	0	0	0	0	0	0	0	0	0	0	73	0	0	0	0	0	0	0	0	1	0	0	0	0	0	0	0	0	0	0	0	0	0	0	0
Basidiomycota	Agaricomycetes	Thelephorales	Thelephoraceae	Tomentella	EcM	ITS1_01969	0	0	0	0	7	3	0	1	0	0	0	0	0	0	0	0	1	4	0	0	0	0	0	0	0	2	1	5	0	0	0	0	1	19	6	0	0	0	0	0	0	0	0
Basidiomycota	Agaricomycetes	Sebacinales	Serendipitaceae		NM	ITS1_01970	0	0	0	0	0	0	0	0	0	0	0	0	0	0	0	0	0	0	71	0	0	0	0	0	0	0	0	0	0	0	0	0	0	0	0	0	0	0	0	0	0	0	0
Basidiomycota	Agaricomycetes	Russulales	Russulaceae	Russula	EcM	ITS1_01971	0	0	0	30	0	0	0	1	0	0	0	0	0	0	0	0	29	7	0	1	0	0	0	1	0	6	1	3	1	0	0	0	0	0	0	0	0	0	0	0	0	0	0
Ascomycota	Eurotiomycetes	Chaetothyriales			NM	ITS1_01972	0	0	0	0	0	0	0	0	0	0	0	0	0	0	0	0	0	0	0	0	0	0	0	0	0	0	0	0	35	0	0	0	0	0	0	0	0	0	0	0	0	0	0
Basidiomycota	Agaricomycetes	Sebacinales	Sebacinaceae		EcM	ITS1_01973	0	0	0	0	3	5	0	0	0	0	0	0	0	0	0	0	0	0	0	0	0	0	0	0	0	0	1	0	0	0	0	0	0	54	10	0	1	0	0	0	0	0	0
Basidiomycota	Agaricomycetes	Sebacinales	Sebacinaceae	Sebacina	EcM	ITS1_01974	0	0	0	0	0	0	0	0	0	0	0	0	0	0	0	0	0	10	0	0	0	0	0	0	0	0	0	3	0	0	0	0	0	0	0	0	0	0	0	0	0	0	0
Basidiomycota	Agaricomycetes	Agaricales	Amanitaceae	Amanita	EcM	ITS1_01976	0	0	0	0	0	0	0	0	0	0	0	0	0	0	0	0	0	1	0	0	0	0	0	0	0	0	0	61	0	0	0	0	0	0	0	0	0	0	0	0	0	0	0
Basidiomycota	Agaricomycetes	Russulales	Russulaceae		EcM	ITS1_01977	0	0	0	0	0	0	0	0	0	0	0	0	0	0	0	0	0	0	0	0	0	0	0	0	0	0	0	0	0	0	0	0	0	0	0	0	0	0	0	0	0	0	0
Ascomycota	Eurotiomycetes	Chaetothyriales	Herpotrichiellaceae	Cladophialophora	NM	ITS1_01978	0	0	0	0	0	0	0	0	0	0	0	0	2	0	0	0	0	0	0	0	0	0	0	0	0	0	0	0	61	0	0	0	0	0	0	0	0	0	0	0	0	0	0
Mortierellomycota	Mortierellomycetes	Mortierellales	Mortierellaceae		NM	ITS1_01979	0	0	0	0	0	0	0	0	0	0	0	0	0	0	0	69	6	3	0	0	0	0	0	0	0	0	1	0	0	0	0	0	0	0	0	0	0	0	0	0	0	0	0
Basidiomycota	Agaricomycetes			Cyphellostereum	NM	ITS1_01980	0	0	0	0	0	0	0	0	0	0	0	0	0	0	0	0	0	0	75	0	0	0	0	0	0	0	0	0	0	0	0	0	0	0	0	0	0	0	0	0	0	0	0
Basidiomycota	Agaricomycetes	Boletales	Boletaceae	Mycoamaranthus	EcM	ITS1_01984	0	0	0	0	0	1	0	0	0	0	0	0	0	0	0	0	0	1	0	0	0	5	32	0	0	0	0	2	0	0	0	0	4	0	0	0	0	0	0	0	0	0	0
Ascomycota	Lecanoromycetes	Lecanorales	Cladoniaceae	Cladonia	NM	ITS1_01986	0	0	0	0	0	0	0	0	0	0	0	0	0	0	0	0	0	0	0	0	0	0	0	1	0	0	0	0	49	0	0	0	0	0	0	0	0	0	0	0	0	0	0
Basidiomycota	Agaricomycetes	Thelephorales	Thelephoraceae		EcM	ITS1_01987	0	0	0	0	0	0	0	0	0	0	0	0	0	0	53	0	0	0	0	0	0	0	0	0	0	0	0	0	0	0	0	0	1	0	0	0	1	0	0	0	0	0	0
Basidiomycota	Agaricomycetes	Russulales	Russulaceae	Lactarius	EcM	ITS1_01988	0	0	0	0	0	0	0	0	0	0	0	0	0	0	0	0	0	0	0	0	0	0	0	0	0	0	0	42	1	0	0	0	0	0	0	0	0	0	0	0	0	0	0
Basidiomycota	Agaricomycetes	Agaricales	Marasmiaceae	Marasmiellus	NM	ITS1_01989	1	0	0	1	44	13	1	9	0	0	0	0	0	0	1	0	1	0	0	0	0	0	0	0	0	0	0	0	0	0	0	0	0	3	2	0	2	0	0	0	0	0	0
Ascomycota	Eurotiomycetes	Chaetothyriales			NM	ITS1_01990	0	0	0	0	0	0	56	1	0	0	0	0	0	0	0	0	0	0	0	0	0	0	0	0	0	0	0	0	0	0	0	0	0	0	0	21	0	0	0	0	1	0	0
Ascomycota	Group0127				NM	ITS1_01991	0	0	0	0	0	0	0	0	0	0	0	0	0	0	79	0	0	0	0	0	0	0	0	0	0	0	0	0	0	0	0	0	0	0	0	0	0	0	0	0	0	0	0
Ascomycota	Group0127				NM	ITS1_01992	0	0	0	0	0	0	4	0	2	0	0	0	0	0	73	0	0	0	0	0	0	0	0	0	0	0	0	0	0	0	0	0	0	0	0	0	0	0	0	0	0	0	0
Basidiomycota	Agaricomycetes	Russulales	Russulaceae		EcM	ITS1_01993	0	0	0	0	0	0	0	0	0	0	0	0	0	0	0	0	0	50	0	0	0	0	0	0	0	0	1	0	0	0	0	1	0	0	0	0	0	0	0	0	0	0	0
Ascomycota	Eurotiomycetes	Chaetothyriales	Herpotrichiellaceae		NM	ITS1_01994	0	0	0	0	0	0	0	0	0	0	0	0	0	23	0	0	0	0	0	0	0	0	0	0	0	0	0	0	0	0	0	0	0	1	0	5	1	0	0	0	0	0	49
Ascomycota	Eurotiomycetes	Chaetothyriales	Herpotrichiellaceae		NM	ITS1_01995	0	0	0	0	0	0	1	0	0	0	0	0	0	0	0	0	0	0	0	0	0	0	0	0	0	0	0	0	0	0	0	0	0	2	0	54	1	0	0	0	0	0	14
Ascomycota	Sordariomycetes	Xylariales	Amphisphaeriaceae	Pestalotiopsis	NM	ITS1_01996	7	0	0	0	0	1	8	0	0	2	2	0	0	1	0	9	2	0	0	0	1	25	0	2	2	9	7	1	0	0	0	0	0	0	0	0	0	0	0	0	0	0	0
Basidiomycota	Agaricomycetes	Sebacinales	Sebacinaceae		EcM	ITS1_01997	0	0	0	0	0	0	0	0	0	0	0	0	68	0	0	1	0	0	0	0	0	0	0	0	0	0	0	0	0	0	0	0	0	0	0	0	0	0	0	0	0	10	0
Mortierellomycota	Mortierellomycetes	Mortierellales	Mortierellaceae	Mortierella	NM	ITS1_01998	0	0	0	0	0	0	0	0	0	0	0	0	0	74	2	0	0	0	0	0	0	0	0	0	0	0	0	0	0	0	0	0	0	0	0	0	0	0	0	0	0	0	2
Basidiomycota	Agaricomycetes	Trechisporales			NM	ITS1_01999	0	0	0	0	0	0	0	0	0	0	0	0	0	0	0	0	0	0	69	0	0	0	0	0	0	0	0	0	1	0	0	0	0	0	0	0	0	0	0	0	0	0	0
Basidiomycota	Agaricomycetes	Sebacinales	Serendipitaceae		NM	ITS1_02000	0	0	0	0	0	0	0	0	0	0	0	0	0	0	0	0	0	0	0	0	0	0	0	0	0	0	0	0	73	0	0	0	0	0	0	0	0	0	0	0	0	0	0
Basidiomycota	Agaricomycetes	Sebacinales	Sebacinaceae		EcM	ITS1_02001	0	0	0	0	0	0	0	0	0	0	0	11	0	0	0	0	0	0	0	0	0	51	2	0	0	0	0	0	0	0	0	0	0	0	0	0	0	0	0	0	2	0	0
Basidiomycota	Agaricomycetes	Polyporales	Polyporaceae	Perenniporia	NM	ITS1_02002	1	3	0	1	1	0	0	0	10	4	5	16	3	0	1	0	0	0	0	0	0	0	0	0	0	0	0	0	0	1	2	0	2	0	0	2	0	11	2	1	8	1	3
Ascomycota	Leotiomycetes	Helotiales			NM	ITS1_02003	0	0	0	0	0	0	0	0	0	0	0	0	0	0	0	2	4	0	0	72	0	0	0	0	0	0	0	0	0	0	0	0	0	0	0	0	0	0	0	0	0	0	0
Ascomycota	Sordariomycetes	Coniochaetales	Coniochaetaceae	Coniochaeta	NM	ITS1_02005	0	0	0	0	0	0	0	0	0	0	0	0	0	0	0	0	1	0	76	0	0	0	0	0	0	0	1	0	0	0	0	0	0	0	0	0	0	0	0	0	0	0	0
Basidiomycota	Agaricomycetes	Agaricales	Lyophyllaceae	Lyophyllum	NM	ITS1_02007	0	0	0	0	0	0	0	0	0	0	0	0	0	0	0	0	0	0	0	0	0	0	47	0	0	0	0	0	0	0	0	0	0	0	0	0	0	0	0	0	0	0	0
Basidiomycota	Agaricomycetes	Trechisporales			NM	ITS1_02008	0	0	0	0	0	0	0	0	0	0	0	0	0	0	38	0	0	0	0	0	0	0	0	0	0	0	0	0	0	0	0	0	0	0	0	0	0	0	0	0	0	0	3
Basidiomycota	Agaricomycetes	Russulales	Russulaceae	Russula	EcM	ITS1_02009	0	0	0	0	0	0	0	0	0	0	0	0	0	0	0	0	4	37	0	0	0	0	0	0	0	0	0	0	0	0	0	0	0	0	0	0	0	0	0	0	0	0	0
Basidiomycota	Agaricomycetes	Thelephorales	Thelephoraceae		EcM	ITS1_02010	0	0	0	0	0	0	0	0	0	0	0	0	0	0	1	0	0	0	1	0	0	0	1	57	2	0	0	0	1	0	0	0	0	0	0	0	0	0	0	0	0	0	0
Basidiomycota	Agaricomycetes	Russulales	Russulaceae	Russula	EcM	ITS1_02011	0	0	0	0	0	0	0	0	0	0	0	0	0	0	0	0	0	0	0	0	0	0	0	0	0	0	0	0	38	0	0	0	0	0	0	0	0	0	0	0	0	0	0
Basidiomycota	Agaricomycetes	Thelephorales	Thelephoraceae		EcM	ITS1_02013	0	0	0	0	0	0	0	0	0	0	0	0	0	0	0	0	0	0	0	0	0	1	67	1	7	0	0	2	0	0	0	0	0	0	0	0	0	0	0	0	0	0	0
Ascomycota	Pezizomycetes	Pezizales	Pyronemataceae		NM	ITS1_02014	1	0	0	0	37	33	0	0	0	0	0	0	1	0	0	0	0	0	0	0	0	0	1	0	0	0	0	0	0	0	0	0	0	5	0	0	0	0	0	0	0	0	0
Ascomycota	Lecanoromycetes				NM	ITS1_02016	0	0	0	0	0	0	0	0	0	0	0	0	0	0	0	0	0	0	0	0	0	0	0	0	0	0	0	0	77	0	0	0	0	0	0	0	0	0	0	0	0	0	0
Basidiomycota	Agaricomycetes	Russulales	Russulaceae	Russula	EcM	ITS1_02017	0	0	0	0	0	0	0	0	0	0	0	0	0	0	0	0	0	0	0	56	0	0	0	0	0	0	0	0	0	0	0	0	0	0	0	0	0	0	0	0	0	0	0
Basidiomycota	Agaricomycetes	Cantharellales	Clavulinaceae		EcM	ITS1_02018	0	0	0	0	0	0	0	0	0	0	4	49	0	0	0	0	0	0	0	0	0	0	0	0	0	0	0	0	0	0	0	0	0	0	0	0	0	0	0	2	22	0	0
Basidiomycota	Agaricomycetes	Thelephorales	Thelephoraceae	Tomentella	EcM	ITS1_02019	0	0	0	0	8	5	0	1	0	0	0	0	0	0	0	0	0	0	0	0	0	0	0	1	0	0	0	0	0	0	0	0	0	40	13	0	8	0	0	0	0	0	0
Basidiomycota	Agaricomycetes	Sebacinales	Sebacinaceae		NM	ITS1_02020	0	0	0	0	0	0	0	0	0	0	0	66	0	0	0	3	0	0	0	0	0	0	0	0	0	0	0	0	0	0	0	0	0	0	0	0	0	0	0	0	8	0	0
Ascomycota	Eurotiomycetes	Chaetothyriales	Herpotrichiellaceae	Cladophialophora	NM	ITS1_02021	0	0	0	0	0	0	0	0	0	0	0	0	0	0	0	3	3	0	1	0	0	3	14	5	8	3	1	8	1	0	0	1	0	0	0	0	0	0	0	0	0	0	0
Ascomycota	Eurotiomycetes	Chaetothyriales			NM	ITS1_02022	0	0	0	0	0	1	0	0	0	0	0	0	3	0	0	0	2	1	0	0	0	1	1	0	22	8	2	9	0	0	0	0	0	0	0	0	0	0	0	0	0	1	0
Basidiomycota	Agaricomycetes	Agaricales	Hygrophoraceae	Cuphophyllus	NM	ITS1_02027	0	0	0	0	0	0	0	0	0	0	0	0	0	0	0	49	0	0	0	0	0	0	0	0	0	0	0	0	0	0	0	0	0	0	0	0	0	0	0	0	0	0	0
Basidiomycota	Agaricomycetes	Agaricales	Entolomataceae		EcM	ITS1_02028	0	0	0	0	0	0	0	0	0	0	0	0	36	0	0	0	0	0	0	0	0	0	0	0	0	0	0	0	0	0	0	0	0	0	0	0	0	0	0	0	0	40	0
Basidiomycota	Agaricomycetes	Agaricales	Marasmiaceae	Marasmius	NM	ITS1_02029	0	0	0	0	0	0	0	0	0	0	0	0	0	0	0	0	0	0	0	0	0	0	0	0	0	0	0	47	0	0	0	0	5	0	0	0	0	0	0	0	0	0	0
Ascomycota	Leotiomycetes	Helotiales			NM	ITS1_02030	0	0	0	0	0	0	0	0	0	0	0	0	0	0	0	0	3	0	73	0	1	0	0	0	0	0	0	0	0	0	0	0	0	0	0	0	0	0	0	0	0	0	0
Basidiomycota	Agaricomycetes	Russulales	Russulaceae	Russula	EcM	ITS1_02031	0	0	0	0	0	0	0	0	0	0	0	0	0	0	0	0	0	0	0	0	0	0	0	14	0	0	0	0	0	0	0	0	0	0	0	0	0	0	0	0	0	0	0
Ascomycota	Pezizomycetes	Pezizales	Pyronemataceae		EcM	ITS1_02032	0	0	0	0	0	0	0	0	0	0	0	0	0	0	0	0	6	61	0	0	0	0	0	0	0	1	0	0	0	0	0	0	0	0	0	0	0	0	0	0	0	0	0
Basidiomycota	Agaricomycetes	Agaricales	Hygrophoraceae	Hygrocybe	NM	ITS1_02033	1	0	0	0	2	0	0	0	0	0	0	0	0	0	0	59	0	0	0	0	0	4	0	0	0	0	0	0	0	0	0	0	0	0	0	0	0	0	0	0	0	0	0
Basidiomycota	Agaricomycetes	Thelephorales	Thelephoraceae		EcM	ITS1_02035	0	0	0	41	0	0	0	0	0	0	0	0	0	0	0	0	0	0	0	0	0	0	0	0	0	0	0	0	0	0	0	0	34	0	0	0	0	0	0	0	0	0	0
Basidiomycota	Agaricomycetes	Sebacinales	Sebacinaceae		EcM	ITS1_02038	0	0	0	0	0	0	0	0	0	0	0	0	0	0	0	0	0	0	0	0	75	0	0	0	0	0	0	1	0	0	0	0	0	0	0	0	0	0	0	0	0	0	0
Basidiomycota	Agaricomycetes	Russulales	Russulaceae	Russula	EcM	ITS1_02039	0	0	0	0	0	0	0	0	0	0	0	0	0	0	0	0	0	69	0	0	0	0	0	1	0	0	0	0	1	0	0	0	0	0	0	0	0	0	0	0	0	0	0
Ascomycota	Leotiomycetes	Helotiales			NM	ITS1_02040	1	43	18	0	2	10	0	0	0	0	0	0	0	0	0	0	0	0	0	1	0	0	0	0	0	0	0	0	0	0	0	0	0	0	0	0	0	0	0	0	0	0	0
Ascomycota	Eurotiomycetes	Eurotiales	Trichocomaceae	Aspergillus	NM	ITS1_02041	0	0	0	0	0	0	46	3	11	1	1	0	1	0	2	0	0	0	0	0	0	0	0	0	0	0	0	0	0	1	0	0	0	0	0	9	0	0	0	0	0	0	0
Ascomycota	Eurotiomycetes	Onygenales			NM	ITS1_02042	0	0	0	0	0	0	1	4	0	0	0	0	0	0	0	0	0	0	0	0	0	0	0	0	0	0	0	0	0	0	0	0	0	0	0	1	69	0	0	0	0	0	0
Basidiomycota	Agaricomycetes	Agaricales	Hydnangiaceae	Laccaria	EcM	ITS1_02043	0	0	0	0	0	0	0	0	0	0	0	0	0	0	0	0	0	0	0	0	0	0	0	0	0	0	0	0	0	0	0	0	0	0	0	0	0	0	0	0	0	0	0
ascomycota	Dothideomycetes				NM	ITS1_02045	0	0	0	0	0	1	0	1	6	0	0	0	0	20	8	3	0	0	0	0	0	0	0	6	0	0	3	2	0	0	0	0	0	3	0	2	1	0	0	0	0	0	4
Basidiomycota	Agaricomycetes	Thelephorales	Thelephoraceae		EcM	ITS1_02046	0	0	0	0	0	0	0	0	0	0	0	0	0	0	0	0	0	0	0	0	0	0	0	53	0	1	1	1	0	0	0	0	0	0	0	0	0	0	0	0	0	0	0
Ascomycota	Group0127				NM	ITS1_02047	0	0	0	0	0	0	12	0	6	0	0	0	0	0	58	0	0	0	0	0	0	0	0	0	0	0	0	0	0	0	0	0	0	0	0	0	0	0	0	0	0	0	0
Ascomycota	Sordariomycetes				NM	ITS1_02048	30	1	0	0	1	0	1	2	25	0	0	2	0	5	0	3	0	0	0	0	0	0	0	0	0	0	0	0	0	2	0	0	0	0	0	2	0	2	0	0	0	0	0
Basidiomycota	Agaricomycetes	Atheliales	Atheliaceae		EcM	ITS1_02049	0	0	0	0	0	0	0	0	0	0	0	0	0	0	0	0	0	0	0	0	0	0	0	0	0	0	0	74	2	0	0	0	0	0	0	0	0	0	0	0	0	0	0
Ascomycota	Dothideomycetes				NM	ITS1_02050	0	0	0	0	0	0	0	0	0	0	0	0	0	0	0	0	0	0	0	0	0	0	0	0	0	0	0	0	53	0	0	0	0	0	0	0	0	0	0	0	0	0	0
Basidiomycota	Agaricomycetes	Russulales	Russulaceae		EcM	ITS1_02051	0	0	0	41	0	0	0	0	0	0	0	0	0	0	0	0	0	0	0	0	0	0	0	0	0	0	0	0	0	0	0	0	33	0	0	0	0	0	0	0	0	0	0
Ascomycota	Fungi_other				NM	ITS1_02053	0	0	0	0	0	0	0	2	0	0	0	0	0	0	0	0	0	0	0	0	0	0	0	0	0	0	0	0	0	0	0	0	0	0	0	0	73	0	0	0	0	0	0
Basidiomycota	Agaricomycetes	Hysterangiales			EcM	ITS1_02055	0	0	0	0	0	0	0	0	0	0	0	0	0	0	0	0	0	0	0	0	20	0	0	0	0	0	0	0	0	0	0	0	0	0	0	0	0	0	0	0	0	0	0
Ascomycota	Sordariomycetes	Hypocreales			NM	ITS1_02056	0	2	0	1	1	0	0	0	1	1	0	0	0	0	0	0	22	0	0	0	0	6	1	1	25	4	5	4	0	0	0	0	0	0	0	0	0	0	0	0	0	0	0
Basidiomycota	Agaricomycetes	Agaricales			EcM	ITS1_02057	0	0	0	0	0	0	0	0	0	0	0	0	56	0	0	0	0	0	0	0	0	0	0	0	0	0	0	0	0	0	0	0	0	0	0	0	0	0	0	0	0	19	0
Basidiomycota	Agaricomycetes	Agaricales	Mycenaceae	Mycena	NM	ITS1_02059	0	48	24	1	0	0	0	0	0	0	0	0	0	0	0	1	0	0	0	0	0	0	0	0	0	0	1	0	0	0	0	0	0	0	0	0	0	0	0	0	0	0	0
Basidiomycota	Agaricomycetes	Polyporales	Ganodermataceae	Ganoderma	NM	ITS1_02060	0	0	0	0	0	0	0	0	14	0	0	0	1	0	5	0	0	0	0	0	0	1	1	8	4	0	0	0	0	0	0	0	0	0	0	0	0	19	0	0	0	0	3
Ascomycota	Dothideomycetes	Venturiales	Sympoventuriaceae	Scolecobasidium	NM	ITS1_02061	0	0	0	0	0	0	0	0	0	0	0	0	0	0	0	0	0	0	0	0	0	0	0	59	0	0	0	0	0	0	0	0	0	0	0	0	0	0	0	0	0	0	0
Ascomycota	Sordariomycetes				NM	ITS1_02063	0	1	0	0	0	0	0	0	0	0	0	0	0	0	74	0	0	0	0	0	0	0	0	0	0	0	0	0	0	0	0	0	0	0	0	0	0	0	0	0	0	0	0
Ascomycota	Eurotiomycetes	Eurotiales	Trichocomaceae	Talaromyces	NM	ITS1_02064	0	0	0	0	0	0	11	0	21	0	1	0	0	19	11	0	0	0	0	0	0	0	0	0	0	0	0	0	0	0	0	0	0	0	0	3	0	5	0	1	0	0	1
Basidiomycota	Agaricomycetes	Thelephorales	Thelephoraceae		EcM	ITS1_02067	0	0	0	0	0	0	0	0	0	0	0	0	0	0	0	0	0	1	0	0	0	0	2	0	1	0	2	37	1	0	0	0	0	2	2	0	0	0	0	0	0	0	0
Ascomycota	Fungi_other				NM	ITS1_02068	2	0	0	0	0	0	0	0	0	0	0	0	0	50	0	0	0	0	0	0	0	0	0	0	0	0	0	0	0	1	0	0	0	0	0	0	0	0	0	0	0	0	21
Basidiomycota	Agaricomycetes	Thelephorales	Thelephoraceae	Tomentella	EcM	ITS1_02070	0	0	0	0	0	0	0	0	0	0	0	0	0	0	0	0	0	1	0	0	0	0	0	0	29	0	0	7	0	0	0	0	0	0	0	0	0	0	0	0	0	0	0
Basidiomycota	Agaricomycetes	Agaricales	Cortinariaceae	Cortinarius	EcM	ITS1_02071	0	0	0	0	0	0	0	0	0	0	0	0	0	0	0	0	0	0	0	0	0	0	0	0	0	0	0	0	30	0	0	0	0	0	0	0	0	0	0	0	0	0	0
Basidiomycota	Agaricomycetes	Agaricales			NM	ITS1_02073	0	0	0	0	0	0	18	0	9	0	0	0	0	0	0	0	0	0	0	0	0	0	0	0	0	0	0	0	0	0	0	0	0	0	0	45	0	0	0	0	0	0	0
Basidiomycota	Agaricomycetes	Agaricales	Cortinariaceae	Cortinarius	EcM	ITS1_02074	0	0	0	0	0	0	0	0	0	0	0	0	0	0	0	0	0	0	0	0	1	0	0	0	0	0	0	0	0	0	0	0	0	0	0	0	0	0	0	0	0	0	0
Basidiomycota	Fungi_other				NM	ITS1_02075	0	0	0	0	0	0	0	0	0	0	0	0	0	0	0	0	0	2	0	0	38	1	0	0	0	0	0	0	0	0	0	0	0	0	0	0	0	0	0	0	0	0	0
Basidiomycota	Agaricomycetes	Thelephorales	Thelephoraceae		EcM	ITS1_02077	0	0	0	1	16	17	0	7	0	0	0	13	0	0	0	0	0	0	0	0	0	0	0	0	0	0	0	0	0	0	0	0	0	14	2	0	0	0	0	0	3	0	0
Basidiomycota	Agaricomycetes	Russulales	Russulaceae	Russula	EcM	ITS1_02078	0	0	0	0	0	0	0	0	0	0	0	0	36	0	0	0	0	0	0	0	0	0	0	0	0	0	0	0	0	0	0	0	1	0	0	0	0	0	0	0	0	37	0
Basidiomycota	Agaricomycetes	Russulales	Russulaceae	Russula	EcM	ITS1_02080	0	0	0	1	25	16	0	0	0	0	0	0	0	0	0	0	0	1	1	0	0	0	0	0	0	1	0	0	0	0	0	0	0	24	1	0	0	0	0	0	0	0	0
Mortierellomycota	Mortierellomycetes	Mortierellales	Mortierellaceae	Mortierella	NM	ITS1_02081	0	0	0	0	0	0	0	0	0	0	0	0	0	0	0	0	1	0	58	1	0	0	0	0	0	0	0	0	0	0	0	0	0	0	0	0	0	0	0	0	0	0	0
Ascomycota	Eurotiomycetes	Chaetothyriales	Herpotrichiellaceae	Cladophialophora	NM	ITS1_02082	0	0	0	0	0	0	0	0	0	0	0	0	0	0	0	0	0	1	0	0	0	1	0	0	0	0	0	0	70	0	0	0	0	0	0	0	0	0	0	0	0	0	0
Ascomycota	Eurotiomycetes	Chaetothyriales	Herpotrichiellaceae	Cladophialophora	NM	ITS1_02085	0	0	0	0	0	0	0	0	0	0	0	0	7	0	0	0	3	23	0	0	0	0	0	0	0	28	9	0	0	0	0	0	0	0	0	0	0	0	0	0	0	1	0
Ascomycota	Fungi_other				NM	ITS1_02087	0	0	0	1	0	0	0	59	0	0	0	0	0	0	0	0	0	0	0	0	0	0	0	0	0	0	0	0	0	0	0	0	0	0	0	0	13	0	0	0	0	0	0
Basidiomycota	Agaricomycetes	Cantharellales	Hydnaceae	Hydnum	EcM	ITS1_02090	0	0	0	9	0	0	0	0	0	0	0	0	0	0	0	0	0	0	0	0	0	0	0	0	0	44	1	1	0	0	0	0	5	0	0	0	0	0	0	0	0	0	0
Basidiomycota	Agaricomycetes	Russulales	Russulaceae	Russula	EcM	ITS1_02091	0	0	0	3	0	0	0	0	0	0	0	0	0	0	0	0	0	0	0	0	0	0	0	0	0	0	0	0	0	0	0	0	70	0	0	0	0	0	0	0	0	0	0
Basidiomycota	Agaricomycetes	Agaricales	Clavariaceae	Clavaria	NM	ITS1_02092	0	0	0	0	0	0	0	0	0	0	0	0	0	0	0	0	0	0	0	0	0	0	0	0	0	0	0	0	0	0	1	0	0	0	0	0	0	0	0	0	0	0	0
Basidiomycota	Agaricomycetes	Thelephorales	Thelephoraceae		EcM	ITS1_02093	0	0	0	0	0	0	0	0	0	0	0	0	0	0	0	0	0	0	0	0	0	0	0	0	0	0	0	72	0	0	0	0	0	0	0	0	0	0	0	0	0	0	0
Basidiomycota	Agaricomycetes	Sebacinales	Sebacinaceae		EcM	ITS1_02094	0	0	0	0	0	0	0	0	0	0	0	0	0	0	0	0	0	0	0	70	0	0	0	0	0	0	0	0	0	0	0	0	0	0	0	0	0	0	0	0	0	0	0
Basidiomycota	Agaricomycetes	Sebacinales	Sebacinaceae		EcM	ITS1_02095	0	0	0	0	0	0	0	0	0	0	0	0	0	0	0	0	0	0	0	0	0	0	0	0	0	0	0	70	0	0	0	0	0	0	0	0	0	0	0	0	0	0	0
Ascomycota	Eurotiomycetes	Chaetothyriales	Herpotrichiellaceae		NM	ITS1_02096	0	2	3	7	0	0	0	0	0	0	0	0	0	0	0	0	0	0	0	0	0	0	0	0	0	0	0	0	0	0	33	11	15	0	0	1	1	0	0	0	0	0	0
Basidiomycota	Agaricomycetes	Cantharellales	Clavulinaceae	Clavulina	EcM	ITS1_02099	0	0	0	52	0	0	0	0	0	0	0	0	0	0	0	0	0	0	0	0	0	0	0	0	0	0	0	0	0	0	0	0	18	0	0	1	0	0	0	0	0	0	0
Basidiomycota	Agaricomycetes	Thelephorales	Thelephoraceae		EcM	ITS1_02100	0	0	0	0	0	0	0	0	0	0	0	0	0	0	0	0	0	1	1	0	0	11	0	36	0	0	0	1	0	0	0	0	0	0	0	0	0	0	0	0	0	0	0
Ascomycota	Leotiomycetes				NM	ITS1_02104	0	0	0	0	0	0	0	0	0	0	0	0	0	0	0	0	0	0	45	0	0	0	0	0	0	0	0	0	0	0	0	1	0	0	0	0	0	0	0	0	0	0	0
Ascomycota	Leotiomycetes	Helotiales			NM	ITS1_02105	0	0	0	0	0	0	0	0	0	0	0	0	0	0	0	0	0	0	1	0	0	0	0	0	0	0	0	21	0	0	0	0	0	0	0	0	0	0	0	0	0	0	0
Ascomycota	Leotiomycetes	Rhytismatales	Rhytismataceae	Coccomyces	NM	ITS1_02106	0	0	0	0	0	0	0	0	0	0	0	0	0	0	0	0	0	0	0	72	0	0	0	0	0	0	0	0	0	0	0	0	0	0	0	0	0	0	0	0	0	0	0
Ascomycota	Leotiomycetes	Helotiales			NM	ITS1_02108	0	0	0	0	0	0	0	0	0	0	0	0	0	0	0	0	0	0	37	0	0	0	0	0	0	0	0	0	0	0	0	1	0	0	0	0	0	0	0	0	0	0	0
Ascomycota	Archaeorhizomycetes	Archaeorhizomycetales	Archaeorhizomycetaceae	Archaeorhizomyces	NM	ITS1_02109	0	0	0	0	0	0	0	0	0	0	0	0	0	0	0	70	0	0	0	0	0	0	0	0	0	0	0	0	0	0	0	0	0	0	0	0	0	0	0	0	0	0	0
Basidiomycota	Agaricomycetes	Boletales	Boletaceae		EcM	ITS1_02111	0	0	0	0	0	0	0	0	0	0	0	0	0	0	0	0	0	7	0	61	0	0	0	0	0	4	0	0	0	0	0	0	0	0	0	0	0	0	0	0	0	0	0
Basidiomycota	Agaricomycetes	Russulales	Russulaceae	Lactarius	EcM	ITS1_02113	0	0	0	9	0	0	0	0	0	0	0	0	0	0	0	0	5	30	0	0	0	0	0	0	0	0	0	0	0	0	0	0	19	0	0	0	0	0	0	0	0	0	0
Ascomycota	Eurotiomycetes	Chaetothyriales	Herpotrichiellaceae	Cladophialophora	NM	ITS1_02114	0	0	0	1	34	23	0	6	0	0	0	0	0	5	0	0	0	0	1	0	0	0	0	0	0	0	0	0	0	0	0	0	0	0	0	0	2	0	0	0	0	0	0
Basidiomycota	Agaricomycetes	Sebacinales	Serendipitaceae		NM	ITS1_02115	0	0	0	0	0	0	0	0	0	0	0	0	0	0	0	0	0	0	0	0	0	5	66	1	0	0	0	0	0	0	0	0	0	0	0	0	0	0	0	0	0	0	0
Ascomycota	Eurotiomycetes	Eurotiales	Trichocomaceae	Aspergillus	NM	ITS1_02116	1	2	0	0	0	0	0	5	0	0	38	0	1	0	0	2	13	0	0	0	0	0	0	0	1	0	0	0	0	0	0	0	0	0	0	0	2	0	0	6	0	0	0
Ascomycota	Fungi_other				NM	ITS1_02117	0	57	15	0	0	0	0	0	0	0	0	0	0	0	0	0	0	0	0	0	0	0	0	0	0	0	0	0	0	0	0	0	0	0	0	0	0	0	0	0	0	0	0
Ascomycota	Sordariomycetes	Chaetosphaeriales	Chaetosphaeriaceae	Phaeoisaria	NM	ITS1_02118	0	0	0	0	0	0	2	1	3	0	0	4	0	8	54	0	0	0	0	0	0	0	0	0	0	0	0	0	0	0	0	0	0	0	0	0	0	0	0	0	0	0	0
Basidiomycota	Fungi_other				NM	ITS1_02119	0	0	0	0	0	0	0	0	0	0	0	0	0	0	0	5	0	0	44	0	0	0	12	0	0	0	0	0	0	0	0	0	0	0	0	0	0	0	0	0	0	0	0
Basidiomycota	Agaricomycetes	Thelephorales	Thelephoraceae	Tomentella	EcM	ITS1_02120	0	0	0	1	0	0	0	0	32	0	0	0	0	0	0	0	0	0	0	0	0	0	0	0	0	0	0	0	0	0	0	0	0	0	0	0	0	38	0	0	0	0	0
Basidiomycota	Wallemiomycetes	Geminibasidiales	Geminibasidiaceae	Geminibasidium	NM	ITS1_02121	0	0	0	0	0	0	0	1	0	15	28	27	0	0	0	0	0	0	0	0	0	0	0	0	0	0	0	0	0	0	0	0	0	0	0	0	0	0	0	0	0	0	0
Ascomycota	Leotiomycetes				NM	ITS1_02122	0	0	0	0	0	0	0	0	0	0	0	0	65	0	0	2	0	0	0	0	2	0	0	0	0	0	0	0	0	0	0	0	0	0	0	0	0	0	0	0	0	2	0
Basidiomycota	Agaricomycetes	Cantharellales	Cantharellaceae		EcM	ITS1_02125	0	0	0	0	0	0	0	0	0	0	0	0	0	0	0	0	0	0	0	0	0	0	0	0	57	0	0	0	0	0	0	0	0	0	0	0	0	0	0	0	0	0	0
Ascomycota	Pezizomycetes	Pezizales	Discinaceae	Hydnotrya	EcM	ITS1_02127	0	0	0	0	0	0	0	0	0	0	0	0	0	0	0	0	0	0	0	0	0	0	0	0	0	4	9	0	0	0	0	0	0	0	0	0	0	0	0	0	0	0	0
Basidiomycota	Agaricomycetes	Agaricales	Cortinariaceae	Cortinarius	EcM	ITS1_02130	0	0	0	0	0	0	0	0	0	0	0	0	0	0	0	0	0	0	0	0	0	0	0	0	0	0	21	2	1	0	0	0	0	0	0	0	0	0	0	0	0	0	0
Basidiomycota	Agaricomycetes	Agaricales	Cortinariaceae	Cortinarius	EcM	ITS1_02131	0	0	0	0	0	0	0	0	1	0	0	0	0	0	0	0	0	0	0	0	0	0	37	0	0	0	0	1	0	0	0	0	0	0	0	0	0	0	0	0	0	0	0
Basidiomycota	Agaricomycetes	Agaricales	Cortinariaceae	Cortinarius	EcM	ITS1_02132	0	0	0	0	0	0	0	0	0	0	0	0	0	0	0	0	0	0	0	48	2	0	0	0	0	0	0	0	0	0	0	0	0	0	0	0	0	0	0	0	0	0	0
Basidiomycota	Agaricomycetes	Agaricales			EcM	ITS1_02134	0	0	0	0	0	0	0	0	0	0	0	0	0	0	0	0	29	27	0	0	0	0	0	1	3	3	6	1	1	0	0	0	0	0	0	0	0	0	0	0	0	0	0
Basidiomycota	Agaricomycetes	Thelephorales	Thelephoraceae		EcM	ITS1_02136	0	0	0	0	1	0	2	0	58	0	0	0	0	0	0	0	0	0	0	0	0	0	0	0	0	0	0	0	0	0	0	0	0	0	0	0	0	10	0	0	0	0	0
Ascomycota	Dothideomycetes				NM	ITS1_02137	0	0	0	0	0	0	0	0	0	0	0	0	0	0	0	0	0	0	69	0	0	0	1	0	0	0	0	0	0	0	0	0	0	0	0	0	0	0	0	0	0	0	0
Ascomycota	Eurotiomycetes	Eurotiales	Trichocomaceae	Aspergillus	NM	ITS1_02138	0	0	0	0	0	0	0	0	0	0	0	0	4	0	0	0	25	0	0	4	0	0	1	0	25	6	2	0	0	0	0	0	0	0	0	0	0	0	0	0	0	0	0
Ascomycota	Fungi_other				NM	ITS1_02139	0	0	1	0	0	0	0	0	69	0	0	0	1	0	0	0	0	0	0	0	0	0	0	0	0	0	0	0	0	0	0	0	0	0	0	0	0	0	0	0	0	0	0
Ascomycota	Eurotiomycetes	Chaetothyriales	Herpotrichiellaceae	Cladophialophora	NM	ITS1_02140	0	0	0	0	0	0	0	0	0	0	0	0	0	0	0	0	0	0	0	0	0	1	56	1	7	0	0	6	0	0	0	0	0	0	0	0	0	0	0	0	0	0	0
Ascomycota	Leotiomycetes	Helotiales			NM	ITS1_02141	0	0	0	0	0	0	0	0	0	0	0	0	0	0	0	3	0	0	61	0	0	0	0	0	0	0	0	0	0	0	0	0	0	0	0	0	0	0	0	0	0	0	0
Ascomycota	Sordariomycetes				NM	ITS1_02142	0	67	0	1	0	0	0	1	0	0	0	2	0	0	0	0	0	0	0	0	0	0	0	0	0	0	0	0	0	0	0	0	0	0	0	0	0	0	0	0	0	0	0
Basidiomycota	Agaricomycetes	Sebacinales			NM	ITS1_02144	0	0	0	0	0	0	0	0	0	0	0	0	0	0	0	0	0	0	55	0	0	0	1	0	0	0	0	0	0	0	0	0	0	0	0	0	0	0	0	0	0	0	0
Mortierellomycota	Mortierellomycetes	Mortierellales	Mortierellaceae	Mortierella	NM	ITS1_02145	0	0	0	0	0	0	0	0	0	0	0	0	1	0	0	48	0	3	0	0	0	3	2	2	1	0	0	0	0	0	0	0	0	0	0	0	0	0	0	0	0	0	0
Basidiomycota	Agaricomycetes	Agaricales	Porotheleaceae	Porotheleum	NM	ITS1_02146	0	0	0	0	0	0	0	0	0	0	0	0	0	0	0	0	0	0	0	0	0	0	0	0	0	0	0	0	0	0	0	0	1	0	0	0	0	65	0	0	4	0	0
Ascomycota	Eurotiomycetes	Chaetothyriales	Herpotrichiellaceae	Cladophialophora	NM	ITS1_02149	0	17	5	0	0	0	0	0	0	0	0	0	1	14	0	0	0	0	0	0	0	0	0	0	0	0	0	0	0	1	3	3	2	0	0	0	0	0	0	0	0	0	23
Ascomycota	Leotiomycetes	Helotiales			NM	ITS1_02151	0	0	0	0	0	0	0	0	0	0	0	0	0	0	0	0	2	0	0	0	1	0	1	0	1	3	1	1	0	0	0	0	0	0	0	0	0	0	0	0	0	0	0
Basidiomycota	Agaricomycetes	Agaricales			NM	ITS1_02153	0	0	0	0	0	0	0	0	46	0	0	0	0	0	0	0	0	0	0	0	0	0	0	0	0	0	0	0	0	0	0	0	0	0	0	0	0	24	0	0	0	0	0
Basidiomycota	Agaricomycetes	Agaricales	Cortinariaceae	Cortinarius	EcM	ITS1_02154	0	0	0	0	0	0	0	0	0	0	0	0	0	0	0	0	0	0	0	6	2	0	0	0	0	0	0	0	0	0	0	0	0	0	0	0	0	0	0	0	0	0	0
Ascomycota	Archaeorhizomycetes	Archaeorhizomycetales	Archaeorhizomycetaceae	Archaeorhizomyces	NM	ITS1_02156	0	0	0	0	0	0	0	0	0	0	0	0	0	70	0	0	0	0	0	0	0	0	0	0	0	0	0	0	0	0	0	0	0	0	0	0	0	0	0	0	0	0	0
Basidiomycota	Agaricomycetes	Russulales	Russulaceae	Russula	EcM	ITS1_02158	0	0	0	0	0	0	0	0	0	0	0	0	0	0	0	0	40	1	0	1	0	0	0	0	0	0	0	0	0	0	0	0	0	0	0	0	0	0	0	0	0	0	0
Ascomycota	Eurotiomycetes	Chaetothyriales	Herpotrichiellaceae	Cladophialophora	NM	ITS1_02159	0	0	0	3	0	0	0	0	0	0	0	0	0	0	0	2	4	0	0	0	0	6	8	12	6	7	3	5	0	0	0	0	0	0	0	0	0	0	0	0	0	0	0
Basidiomycota	Agaricomycetes	Thelephorales	Thelephoraceae		EcM	ITS1_02160	0	0	0	0	0	0	0	0	0	0	0	2	0	0	41	0	0	0	0	0	0	0	0	0	0	0	0	0	0	0	0	0	0	0	0	0	0	0	0	0	0	0	0
Basidiomycota	Agaricomycetes	Corticiales	Corticiaceae		NM	ITS1_02161	0	19	5	0	0	0	0	0	0	0	0	0	0	0	1	1	0	0	0	0	0	0	0	0	1	0	0	0	0	0	30	13	0	0	0	0	0	0	0	0	0	0	0
Basidiomycota	Agaricomycetes	Thelephorales	Thelephoraceae		EcM	ITS1_02163	0	0	0	0	0	1	0	0	0	0	0	0	0	0	0	0	0	0	0	0	0	0	0	68	0	0	0	1	0	0	0	0	0	0	0	0	0	0	0	0	0	0	0
Ascomycota	Eurotiomycetes	Eurotiales	Trichocomaceae	Aspergillus	NM	ITS1_02164	0	0	0	0	0	0	0	63	0	0	0	0	0	2	0	0	0	0	0	0	0	0	0	0	0	0	0	0	0	0	0	0	0	0	0	0	5	0	0	0	0	0	0
Basidiomycota	Agaricomycetes	Sebacinales	Sebacinaceae		EcM	ITS1_02165	0	0	0	0	0	0	0	46	0	0	0	0	0	0	0	0	0	0	0	0	0	0	0	0	0	0	0	0	0	0	0	0	0	0	0	0	23	0	0	0	0	0	0
Ascomycota	Leotiomycetes	Helotiales		Cadophora	NM	ITS1_02166	0	0	0	0	0	0	0	0	0	0	0	0	57	1	0	2	0	0	0	0	0	0	0	0	0	0	0	0	0	0	0	0	0	0	0	0	0	0	0	0	0	9	0
Ascomycota	Eurotiomycetes	Eurotiales			NM	ITS1_02167	0	0	0	0	34	16	0	17	0	0	0	0	0	1	0	0	0	0	0	0	0	0	0	0	0	0	0	1	0	0	0	0	0	0	0	0	0	0	0	0	0	0	0
Basidiomycota	Agaricomycetes	Thelephorales	Thelephoraceae	Tomentella	EcM	ITS1_02168	0	0	0	0	24	21	0	0	0	0	0	0	0	0	0	0	0	0	0	0	0	0	1	0	0	0	0	0	0	0	0	0	0	18	5	0	0	0	0	0	0	0	0
Ascomycota	Pezizomycetes	Pezizales	Sarcosomataceae		NM	ITS1_02169	0	0	0	0	0	0	0	0	0	0	0	0	0	0	0	0	0	0	0	0	0	0	0	0	0	0	0	0	0	0	0	0	0	55	11	0	1	0	0	0	0	0	0
Ascomycota	Dothideomycetes	Pleosporales			NM	ITS1_02170	0	0	0	0	0	0	0	0	0	0	0	0	0	0	0	0	3	0	14	0	0	0	0	0	1	0	5	0	4	0	0	0	0	0	0	0	0	0	0	0	0	0	0
Ascomycota	Dothideomycetes	Hysteriales	Gloniaceae	Cenococcum	EcM	ITS1_02173	0	0	0	0	0	0	0	0	0	0	0	0	0	0	0	0	1	4	0	1	0	10	22	0	6	0	5	20	0	0	0	0	0	0	0	0	0	0	0	0	0	0	0
Basidiomycota	Agaricomycetes	Agaricales	Inocybaceae	Simocybe	NM	ITS1_02174	0	0	0	0	0	0	0	0	11	0	0	0	0	0	0	0	0	0	0	0	0	0	0	0	0	0	0	0	0	0	0	0	0	0	0	0	0	58	0	0	0	0	0
Basidiomycota	Agaricomycetes	Agaricales	Tricholomataceae	Delicatula	NM	ITS1_02176	0	0	0	0	9	7	0	0	0	0	1	14	0	0	0	1	0	0	0	0	0	0	0	0	0	0	0	0	0	0	11	1	1	2	0	1	0	0	1	1	17	0	0
Basidiomycota	Agaricomycetes	Agaricales	Pluteaceae	Pluteus	NM	ITS1_02177	0	0	0	0	0	0	0	0	0	0	0	0	0	0	35	0	0	0	0	0	0	0	0	0	0	0	0	0	0	0	0	0	0	0	0	0	0	0	0	0	0	0	0
Basidiomycota	Agaricomycetes	Boletales	Boletaceae		EcM	ITS1_02178	0	0	0	0	0	0	0	0	0	4	6	15	2	0	0	0	0	0	0	0	0	0	0	0	0	0	0	0	0	0	0	0	0	0	0	0	0	0	15	3	23	1	0
Basidiomycota	Agaricomycetes	Agaricales	Entolomataceae	Entoloma	NM	ITS1_02179	2	0	0	0	23	6	3	0	0	0	0	0	0	1	0	0	0	0	0	0	0	0	0	0	0	0	0	0	0	1	0	0	2	17	9	2	0	0	0	0	0	0	0
Basidiomycota	Agaricomycetes				NM	ITS1_02180	0	40	24	0	0	0	0	1	0	0	1	0	0	0	1	0	0	1	0	0	0	0	0	0	0	0	0	0	0	0	0	0	0	0	0	0	0	0	0	0	0	0	0
Basidiomycota	Agaricomycetes	Russulales	Russulaceae	Russula	EcM	ITS1_02181	0	0	0	0	0	0	0	0	0	0	0	0	0	0	0	0	5	56	0	0	0	0	0	0	0	8	0	0	0	0	0	0	0	0	0	0	0	0	0	0	0	0	0
Ascomycota	Orbiliomycetes	Orbiliales	Orbiliaceae		NM	ITS1_02182	1	32	5	0	0	0	0	0	0	0	0	0	0	0	0	0	0	0	0	0	0	0	0	0	5	0	0	8	0	0	9	1	0	0	0	0	0	0	0	0	0	0	0
Ascomycota	Sordariomycetes	Magnaporthales	Magnaporthaceae	Mycoleptodiscus	NM	ITS1_02183	0	11	3	2	0	0	0	0	5	1	0	4	0	23	1	0	0	0	0	0	0	0	0	0	0	0	0	0	0	0	1	2	1	0	0	0	0	0	1	0	2	1	11
Ascomycota	Eurotiomycetes	Chaetothyriales	Herpotrichiellaceae	Phaeomoniella	NM	ITS1_02184	0	0	0	0	24	20	0	0	0	0	1	0	0	0	0	0	0	0	0	0	0	0	0	0	0	0	0	0	0	0	0	0	0	21	0	0	0	0	0	0	0	0	0
Basidiomycota	Wallemiomycetes	Geminibasidiales	Geminibasidiaceae	Geminibasidium	NM	ITS1_02185	3	0	0	0	9	6	0	0	0	0	0	0	0	0	0	0	0	0	0	0	0	0	0	0	0	0	0	0	0	7	0	0	0	32	10	0	0	0	0	0	0	0	0
Basidiomycota	Agaricomycetes	Thelephorales	Thelephoraceae		EcM	ITS1_02186	0	0	0	0	0	0	0	0	0	0	0	0	0	0	0	0	0	0	0	0	0	0	0	0	0	0	0	0	0	0	0	0	0	0	0	0	0	0	0	0	0	0	68
Basidiomycota	Agaricomycetes	Sebacinales	Serendipitaceae		NM	ITS1_02187	0	0	0	0	0	0	0	0	0	0	0	0	0	0	0	0	0	0	0	0	0	0	0	0	17	34	0	0	0	0	0	0	0	0	0	0	0	0	0	0	0	0	0
Basidiomycota	Agaricomycetes	Russulales	Russulaceae	Russula	EcM	ITS1_02188	0	0	0	0	0	0	0	0	0	0	0	0	0	0	0	0	0	0	0	0	0	0	0	0	0	0	0	47	0	0	0	0	0	0	0	0	0	0	0	0	0	0	0
Basidiomycota	Agaricomycetes	Atheliales	Atheliaceae		EcM	ITS1_02189	0	0	0	0	0	0	0	0	0	0	0	0	0	0	0	0	0	0	0	0	0	0	0	0	0	0	0	0	0	0	0	0	0	0	0	0	0	0	0	0	0	0	0
Ascomycota	Eurotiomycetes	Chaetothyriales	Herpotrichiellaceae	Cladophialophora	NM	ITS1_02190	1	0	0	0	0	0	0	0	0	0	0	46	0	0	0	0	0	0	0	0	0	0	0	0	0	0	0	0	0	0	0	0	0	0	0	0	0	0	0	0	21	0	0
Ascomycota	Eurotiomycetes	Chaetothyriales			NM	ITS1_02192	0	6	0	0	0	0	0	0	3	0	0	0	0	0	0	0	0	0	0	0	0	0	9	3	2	0	0	40	1	0	0	0	0	0	0	0	0	0	0	0	0	0	0
Ascomycota	Eurotiomycetes	Chaetothyriales			NM	ITS1_02196	1	29	15	6	0	0	0	0	0	0	0	0	1	0	1	0	0	0	0	0	0	0	0	0	0	0	0	0	0	0	13	2	0	0	0	0	0	0	0	0	0	0	0
Ascomycota	Eurotiomycetes	Chaetothyriales			NM	ITS1_02198	0	1	0	1	0	0	0	0	0	0	0	0	0	0	0	9	3	4	0	0	0	0	3	0	0	1	0	1	0	0	3	0	4	0	0	0	0	0	0	0	0	0	0
Basidiomycota	Agaricomycetes	Agaricales	Cortinariaceae	Cortinarius	EcM	ITS1_02199	0	0	0	0	0	0	0	0	0	0	0	0	0	0	0	0	0	0	0	0	0	0	0	0	0	0	0	0	0	0	0	0	0	0	0	0	0	0	0	0	0	0	0
Basidiomycota	Agaricomycetes	Agaricales	Psathyrellaceae	Psathyrella	NM	ITS1_02200	0	1	0	0	0	0	0	0	0	0	0	0	0	0	27	0	0	0	0	0	0	0	0	0	0	0	0	0	0	0	0	0	0	0	0	0	0	0	0	0	0	0	0
Basidiomycota	Agaricomycetes	Thelephorales	Thelephoraceae		EcM	ITS1_02201	0	0	0	0	0	0	0	0	0	0	0	0	0	0	0	0	0	0	0	0	0	0	0	0	0	0	0	0	0	0	0	0	67	1	0	0	0	0	0	0	0	0	0
Basidiomycota	Agaricomycetes	Thelephorales	Thelephoraceae	Tomentella	EcM	ITS1_02202	0	0	0	0	0	0	0	0	0	0	0	0	0	0	0	0	0	0	0	0	0	0	0	0	0	0	0	0	58	0	0	0	0	0	0	0	0	0	0	0	0	0	0
Basidiomycota	Agaricomycetes	Cantharellales	Clavulinaceae		EcM	ITS1_02203	0	0	0	0	0	0	0	0	0	0	0	0	0	0	0	0	0	65	0	0	0	0	0	0	0	0	0	0	0	0	0	0	0	0	0	0	0	0	0	0	0	0	0
Ascomycota	Leotiomycetes	Helotiales	Hyaloscyphaceae	Arachnopeziza	NM	ITS1_02204	0	0	0	0	0	0	0	0	0	0	0	0	0	0	0	0	0	0	0	1	58	0	0	0	0	0	0	0	0	0	0	0	0	0	0	0	0	0	0	0	0	0	0
Ascomycota	Eurotiomycetes	Chaetothyriales	Herpotrichiellaceae		NM	ITS1_02205	0	0	0	0	0	0	3	0	0	0	0	0	0	0	0	0	0	0	0	0	0	0	0	0	0	0	0	0	0	0	0	0	0	0	0	14	46	0	0	0	0	0	2
Ascomycota	Sordariomycetes	Hypocreales	Hypocreaceae		NM	ITS1_02206	4	0	0	0	0	0	0	0	0	0	0	0	0	0	0	24	23	0	4	0	2	0	4	0	6	0	1	0	0	0	0	0	0	0	0	0	0	0	0	0	0	0	0
Ascomycota	Eurotiomycetes	Chaetothyriales	Herpotrichiellaceae		NM	ITS1_02207	0	29	11	0	0	0	0	0	0	2	0	25	1	0	0	0	0	0	0	0	0	0	0	0	0	0	0	0	0	0	0	0	0	0	0	0	0	0	0	0	0	0	0
Ascomycota	Eurotiomycetes	Chaetothyriales	Herpotrichiellaceae	Cladophialophora	NM	ITS1_02208	0	0	0	0	0	0	0	0	0	13	0	55	0	0	0	0	0	0	0	0	0	0	0	0	0	0	0	0	0	0	0	0	0	0	0	0	0	0	0	0	0	0	0
Basidiomycota	Agaricomycetes	Sebacinales	Sebacinaceae		EcM	ITS1_02209	0	0	0	0	0	0	0	0	0	0	0	0	0	0	67	0	0	0	0	0	0	0	0	0	0	0	0	0	0	0	0	0	0	0	0	0	0	0	0	0	0	0	0
Basidiomycota	Agaricomycetes	Thelephorales	Thelephoraceae	Tomentella	EcM	ITS1_02210	0	0	0	0	0	0	0	0	0	0	0	0	0	0	0	0	0	1	0	0	47	0	0	0	0	0	0	0	0	0	0	0	0	0	0	0	0	0	0	0	0	0	0
Ascomycota	Fungi_other				NM	ITS1_02212	0	0	0	0	0	0	0	0	0	5	0	45	6	1	0	2	0	0	0	0	0	0	0	0	0	0	0	0	0	0	0	0	0	0	0	0	0	0	0	2	6	0	0
Basidiomycota	Agaricomycetes	Cantharellales	Hydnaceae	Sistotrema	EcM	ITS1_02213	0	0	0	0	0	0	0	0	0	0	0	0	0	0	0	0	0	1	0	0	0	0	0	0	0	54	0	0	2	0	0	0	0	0	0	0	0	0	0	0	0	0	0
Basidiomycota	Agaricomycetes	Sebacinales	Sebacinaceae	Sebacina	EcM	ITS1_02214	0	0	0	0	0	0	0	0	0	0	0	0	0	0	0	0	0	0	0	0	0	0	0	0	0	0	0	0	0	0	0	0	0	52	9	0	0	0	0	0	0	0	6
Basidiomycota	Agaricomycetes	Thelephorales	Thelephoraceae	Tomentella	EcM	ITS1_02215	0	0	0	0	0	0	0	0	0	0	0	0	0	0	0	0	0	1	0	0	0	0	0	0	0	0	0	0	42	0	0	0	0	0	0	0	0	0	0	0	0	0	0
Basidiomycota	Agaricomycetes	Gomphales	Gomphaceae	Ramaria	NM	ITS1_02219	0	0	0	0	0	0	1	0	0	0	0	0	0	0	0	0	0	0	0	0	0	0	0	0	0	0	0	0	0	0	0	0	0	0	0	66	0	0	0	0	0	0	0
Basidiomycota	Agaricomycetes	Agaricales	Marasmiaceae	Clitocybula	NM	ITS1_02220	0	0	0	0	0	0	0	0	0	0	0	0	0	0	0	0	0	1	53	0	0	0	0	0	0	0	0	1	0	0	0	0	0	0	0	0	0	0	0	0	0	0	0
Basidiomycota	Agaricomycetes	Agaricales	Hydnangiaceae	Laccaria	EcM	ITS1_02221	0	0	0	0	0	0	0	0	0	0	0	0	38	0	1	0	0	0	0	0	0	0	0	0	0	0	0	0	0	0	0	0	0	0	0	0	0	0	0	0	0	28	0
Ascomycota	Orbiliomycetes	Orbiliales			NM	ITS1_02222	1	0	0	0	19	12	0	0	0	0	0	0	0	0	0	0	0	0	0	0	0	0	0	0	0	0	0	0	0	0	0	0	1	24	7	0	0	0	0	0	0	0	1
Basidiomycota	Agaricomycetes	Agaricales	Strophariaceae	Hebeloma	EcM	ITS1_02223	0	0	0	0	0	0	0	0	0	0	0	0	0	0	0	0	0	0	0	1	0	1	65	0	0	0	0	0	0	0	0	0	0	0	0	0	0	0	0	0	0	0	0
Basidiomycota	Agaricomycetes	Agaricales	Inocybaceae	Inocybe	EcM	ITS1_02224	0	0	0	34	0	0	0	0	0	0	0	0	0	0	0	1	0	0	0	0	0	0	0	0	0	0	0	0	0	0	0	0	32	0	0	0	0	0	0	0	0	0	0
Basidiomycota	Agaricomycetes	Thelephorales	Thelephoraceae		EcM	ITS1_02225	0	0	0	0	0	0	0	0	0	0	0	0	0	0	0	0	0	0	0	0	0	0	0	0	0	0	0	1	53	0	0	0	0	0	0	0	0	0	0	0	0	0	0
Basidiomycota	Agaricomycetes	Thelephorales	Thelephoraceae	Tomentella	EcM	ITS1_02226	0	0	0	0	0	0	0	0	0	0	0	0	0	0	0	0	0	0	0	0	0	0	0	0	0	0	0	1	45	0	0	0	0	0	0	0	0	0	0	0	0	0	0
Ascomycota	Eurotiomycetes	Eurotiales	Trichocomaceae	Paecilomyces	NM	ITS1_02227	0	0	0	0	0	0	0	0	0	0	0	0	10	0	1	4	40	0	11	0	0	0	0	0	0	0	1	0	0	0	0	0	0	0	0	0	0	0	0	0	0	0	0
Ascomycota	Eurotiomycetes	Chaetothyriales	Herpotrichiellaceae	Cladophialophora	NM	ITS1_02230	0	0	0	0	0	0	0	0	0	0	0	0	0	0	0	0	0	0	0	0	0	0	0	0	0	0	0	0	54	0	0	0	0	0	0	0	0	0	0	0	0	0	0
Ascomycota	Leotiomycetes				NM	ITS1_02231	0	0	0	0	0	0	0	0	0	0	0	0	0	0	0	0	0	0	54	0	0	0	0	0	0	0	0	0	0	0	0	0	0	0	0	0	0	0	0	0	0	0	0
Ascomycota	Eurotiomycetes				NM	ITS1_02232	0	0	0	0	0	0	0	0	0	0	0	0	0	0	40	0	0	0	0	0	0	0	0	0	0	0	0	0	0	0	0	0	0	1	0	0	0	0	0	0	0	0	0
Basidiomycota	Agaricomycetes	Sebacinales	Sebacinaceae		EcM	ITS1_02236	0	0	0	0	0	0	0	0	0	0	0	0	0	0	0	0	0	0	0	0	0	50	12	0	4	0	0	0	0	0	0	0	0	0	0	0	0	0	0	0	0	0	0
Ascomycota	Eurotiomycetes	Eurotiales	Trichocomaceae	Penicillium	NM	ITS1_02238	0	0	0	0	0	0	0	0	0	0	0	0	0	0	0	2	41	0	0	0	1	18	0	0	3	0	0	0	1	0	0	0	0	0	0	0	0	0	0	0	0	0	0
Ascomycota	Leotiomycetes				NM	ITS1_02239	0	0	0	0	0	0	0	0	0	0	0	0	0	0	0	0	0	0	36	0	0	0	0	0	0	0	0	1	0	0	0	0	0	0	0	0	0	0	0	0	0	0	0
Ascomycota	Eurotiomycetes	Chaetothyriales	Herpotrichiellaceae		NM	ITS1_02240	0	0	0	0	0	0	17	0	0	0	0	0	0	1	0	0	0	0	0	0	0	0	0	0	0	0	0	0	0	0	0	0	0	0	0	29	3	0	0	0	0	0	15
Basidiomycota	Agaricomycetes	Cantharellales	Cantharellaceae		EcM	ITS1_02242	0	0	0	0	0	0	0	0	0	0	0	0	0	0	0	0	0	0	0	41	21	0	0	0	0	0	0	4	0	0	0	0	0	0	0	0	0	0	0	0	0	0	0
Mucoromycota	Mucoromycetes	Mucorales	Backusellaceae	Backusella	NM	ITS1_02243	0	0	0	0	0	0	0	0	0	0	0	0	0	0	0	0	0	0	0	0	0	0	0	0	0	0	0	0	0	2	3	2	15	0	0	0	0	0	0	0	0	0	0
Basidiomycota	Agaricomycetes	Russulales	Russulaceae	Russula	EcM	ITS1_02244	0	0	0	2	37	27	0	0	0	0	0	0	0	0	0	0	0	0	0	0	0	0	0	0	0	0	0	0	0	0	0	0	0	0	0	0	0	0	0	0	0	0	0
Basidiomycota	Agaricomycetes	Agaricales	Cortinariaceae	Cortinarius	EcM	ITS1_02245	0	0	0	0	0	0	0	0	0	0	0	0	0	0	0	0	0	0	0	0	0	0	0	0	0	0	0	0	0	0	0	0	0	0	0	0	0	0	0	0	0	65	0
Basidiomycota	Agaricomycetes	Agaricales	Entolomataceae	Entoloma	NM	ITS1_02246	0	0	0	0	0	0	0	0	0	0	0	0	0	0	0	4	0	0	36	0	1	0	3	1	1	0	3	0	0	0	0	0	0	0	0	0	0	0	0	0	0	0	0
Basidiomycota	Agaricomycetes	Agaricales	Strophariaceae	Galerina	NM	ITS1_02247	0	0	0	0	0	0	0	0	0	0	0	0	0	0	0	0	0	1	47	0	0	0	0	0	1	0	0	1	0	0	0	0	0	0	0	0	0	0	0	0	0	0	0
Basidiomycota	Agaricomycetes	Agaricales	Entolomataceae	Entoloma	NM	ITS1_02248	0	0	0	0	0	0	0	0	0	0	0	0	1	0	32	0	0	0	0	0	0	0	0	0	0	0	0	0	0	0	0	0	0	0	0	0	0	0	0	0	0	0	0
Mucoromycota	Mucoromycetes	Umbelopsidales	Umbelopsidaceae	Umbelopsis	NM	ITS1_02249	0	0	0	0	0	0	0	0	0	1	2	17	6	0	0	0	0	0	0	0	0	0	0	0	0	0	0	0	0	0	0	0	0	0	0	0	0	0	4	7	23	5	0
Basidiomycota	Agaricomycetes	Russulales	Russulaceae		EcM	ITS1_02252	0	0	0	0	0	0	0	0	0	0	0	0	0	0	0	0	0	11	0	0	0	0	0	0	0	0	0	0	0	0	0	0	0	0	0	0	0	0	0	0	0	0	0
Basidiomycota	Agaricomycetes	Trechisporales			NM	ITS1_02254	0	0	0	0	0	0	0	0	0	0	0	0	0	0	0	62	0	0	0	0	0	0	0	1	0	0	0	0	0	0	0	0	0	1	0	0	0	0	0	0	0	0	0
Basidiomycota	Agaricomycetes	Thelephorales	Thelephoraceae		EcM	ITS1_02255	0	0	0	0	0	0	0	0	0	0	0	0	0	0	0	0	0	0	0	0	0	0	0	0	0	1	0	0	49	0	0	0	0	0	0	0	0	0	0	0	0	0	0
Basidiomycota	Agaricomycetes	Thelephorales	Thelephoraceae	Tomentella	EcM	ITS1_02256	0	0	0	0	0	0	0	0	0	0	0	0	0	0	0	0	0	0	0	0	0	0	58	0	1	0	1	0	0	0	0	0	0	0	0	0	0	0	0	0	0	0	0
Basidiomycota	Agaricomycetes	Thelephorales	Thelephoraceae		EcM	ITS1_02257	0	0	0	0	20	3	0	0	0	0	0	0	0	0	0	0	0	1	0	0	0	6	11	0	0	0	4	1	0	0	0	0	0	10	0	0	0	0	0	0	0	0	0
Ascomycota	Sordariomycetes	Hypocreales	Hypocreaceae	Trichoderma	NM	ITS1_02258	0	1	0	0	0	0	1	0	11	37	2	13	1	0	0	0	0	0	0	0	0	0	0	0	0	0	0	0	0	0	0	0	0	0	0	0	0	0	0	0	0	0	0
Ascomycota	Lecanoromycetes				NM	ITS1_02259	0	0	0	0	0	0	0	0	0	0	0	0	0	0	0	2	0	0	0	0	5	0	0	0	0	0	0	0	48	0	0	0	0	0	0	0	0	0	0	0	0	0	0
Basidiomycota	Agaricomycetes	Thelephorales	Thelephoraceae		EcM	ITS1_02260	0	0	0	0	0	0	0	0	0	0	0	0	0	0	0	0	0	0	0	0	0	0	0	0	0	0	0	0	0	0	0	0	0	0	0	16	0	37	0	0	0	0	12
Basidiomycota	Agaricomycetes	Sebacinales	Sebacinaceae		EcM	ITS1_02262	0	0	0	0	0	0	0	0	0	0	0	0	0	0	0	0	4	42	1	0	0	0	0	0	1	0	8	1	0	0	0	0	0	0	0	0	0	0	0	0	0	0	0
Ascomycota	Sordariomycetes	Chaetosphaeriales	Chaetosphaeriaceae	Chloridium	NM	ITS1_02263	0	0	0	0	0	0	0	0	0	0	0	0	0	0	0	0	21	1	0	0	1	0	9	0	0	16	15	2	0	0	0	0	0	0	0	0	0	0	0	0	0	0	0
Ascomycota	Fungi_other				NM	ITS1_02264	0	0	0	1	0	0	0	0	0	0	0	0	1	0	2	61	0	0	0	0	0	0	0	0	0	0	0	0	0	0	0	0	0	0	0	0	0	0	0	0	0	0	0
Ascomycota	Eurotiomycetes	Eurotiales	Trichocomaceae	Penicillium	NM	ITS1_02268	0	0	0	0	0	2	0	0	0	6	10	0	0	0	0	0	0	0	0	0	0	0	0	0	0	0	4	0	0	0	0	0	0	0	0	0	1	0	1	37	0	0	0
Ascomycota	Leotiomycetes	Helotiales			NM	ITS1_02269	0	0	0	0	0	0	0	0	0	0	0	0	0	0	0	0	0	0	0	0	0	0	0	0	0	0	0	17	0	0	0	0	0	0	0	0	0	0	0	0	0	0	0
Ascomycota	Sordariomycetes	Sordariales			NM	ITS1_02270	0	0	0	0	0	3	0	0	0	0	0	0	0	0	0	0	0	2	0	0	0	1	5	0	0	2	1	51	0	0	0	0	0	0	0	0	0	0	0	0	0	0	0
Basidiomycota	Agaricomycetes	Cantharellales	Cantharellaceae		EcM	ITS1_02271	0	0	0	0	0	0	0	0	0	0	0	0	0	0	0	0	0	0	1	0	0	8	54	1	0	0	0	1	0	0	0	0	0	0	0	0	0	0	0	0	0	0	0
Basidiomycota	Agaricomycetes	Agaricales	Inocybaceae		EcM	ITS1_02272	0	0	0	0	0	0	0	17	0	0	0	0	0	0	0	0	0	0	0	0	0	0	0	0	0	0	0	0	0	0	0	0	0	0	0	0	48	0	0	0	0	0	0
Basidiomycota	Agaricomycetes	Agaricales	Cortinariaceae		EcM	ITS1_02273	0	0	0	0	0	1	0	0	0	0	0	0	0	0	0	0	0	0	0	0	33	0	0	0	0	0	0	1	0	0	0	0	0	0	0	0	0	0	0	0	0	0	0
Ascomycota	Dothideomycetes				NM	ITS1_02275	0	0	0	0	0	0	0	45	0	0	0	0	0	0	0	0	0	0	0	0	0	0	0	0	0	0	0	0	0	0	0	0	0	0	0	0	19	0	0	0	0	0	0
Basidiomycota	Agaricomycetes	Agaricales	Tricholomataceae		NM	ITS1_02276	0	0	0	0	0	0	0	0	0	0	4	33	0	0	0	0	0	0	0	0	0	0	0	0	0	0	0	0	0	0	0	0	0	0	0	0	0	0	0	1	27	0	0
Basidiomycota	Agaricomycetes	Agaricales	Tricholomataceae		NM	ITS1_02277	0	0	0	0	7	3	2	0	0	1	0	9	0	2	0	0	0	0	1	0	0	0	0	1	0	0	0	1	0	0	0	0	0	5	0	1	0	0	1	0	8	0	23
Ascomycota	Eurotiomycetes	Chaetothyriales	Herpotrichiellaceae	Phaeomoniella	NM	ITS1_02279	0	0	0	0	0	0	0	0	0	0	0	0	26	0	0	1	0	0	0	0	0	0	0	0	0	8	1	2	0	0	0	0	0	0	0	0	0	0	0	0	0	17	0
Basidiomycota	Agaricomycetes	Thelephorales	Thelephoraceae		EcM	ITS1_02280	0	0	0	2	0	0	0	0	0	0	0	0	0	0	0	0	0	0	0	0	0	0	0	0	0	0	1	45	0	0	0	0	1	0	0	0	0	0	0	0	0	0	0
Basidiomycota	Agaricomycetes	Trechisporales			NM	ITS1_02281	0	1	0	0	0	0	0	0	0	0	0	0	0	0	1	54	0	0	0	0	0	0	0	0	0	0	0	0	0	0	0	0	0	0	0	0	0	0	0	0	0	0	0
Basidiomycota	Agaricomycetes	Sebacinales	Sebacinaceae		EcM	ITS1_02282	0	0	0	0	28	25	0	0	0	0	0	0	0	0	0	0	0	0	1	0	0	0	1	0	0	1	0	0	0	0	0	0	0	8	1	0	0	0	0	0	0	0	0
Mortierellomycota	Mortierellomycetes	Mortierellales	Mortierellaceae	Mortierella	NM	ITS1_02287	0	0	0	0	0	0	2	0	0	0	0	0	0	0	1	0	0	0	0	0	0	0	0	0	0	0	0	0	0	0	0	0	1	0	0	42	0	18	0	0	0	0	0
Basidiomycota	Agaricomycetes	Sebacinales			NM	ITS1_02289	0	0	0	0	0	0	0	0	0	0	0	0	0	0	0	0	0	0	1	0	0	6	48	0	1	0	1	0	0	0	0	0	0	0	0	0	0	0	0	0	0	0	0
Ascomycota	Eurotiomycetes				NM	ITS1_02290	0	0	0	0	0	0	0	0	0	0	0	0	0	0	0	0	0	0	0	0	0	0	0	0	0	0	0	0	0	0	0	0	0	0	0	51	0	0	0	0	0	0	0
Ascomycota	Sordariomycetes	Hypocreales	Clavicipitaceae	Pochonia	NM	ITS1_02291	0	0	0	0	0	0	0	0	0	0	0	0	0	0	0	0	2	0	0	0	0	12	0	1	5	8	36	0	0	0	0	0	0	0	0	0	0	0	0	0	0	0	0
Ascomycota	Eurotiomycetes	Chaetothyriales	Herpotrichiellaceae	Cladophialophora	NM	ITS1_02292	1	0	0	0	0	0	24	15	0	0	0	0	0	0	0	0	0	0	0	0	0	0	0	0	0	0	0	0	0	0	0	0	0	0	0	14	9	0	0	0	0	0	0
Basidiomycota	Agaricomycetes	Agaricales	Cortinariaceae	Cortinarius	EcM	ITS1_02294	0	0	0	0	0	0	0	0	0	0	0	0	0	0	0	0	0	0	0	0	0	0	0	64	0	0	0	0	0	0	0	0	0	0	0	0	0	0	0	0	0	0	0
Ascomycota	Sordariomycetes	Sordariales			NM	ITS1_02295	0	0	0	0	0	0	0	0	0	0	0	0	0	0	0	0	1	0	0	19	34	0	0	0	0	0	0	0	0	0	0	0	0	0	0	0	0	0	0	0	0	0	0
Basidiomycota	Agaricomycetes	Agaricales	Tricholomataceae		NM	ITS1_02296	0	0	0	0	0	1	0	0	0	0	0	0	0	0	0	0	0	0	51	0	1	0	2	0	0	0	0	1	0	0	0	0	0	0	0	0	0	0	0	0	0	0	0
Basidiomycota	Agaricomycetes	Cantharellales	Clavulinaceae	Clavulina	EcM	ITS1_02297	0	0	0	0	0	0	0	0	0	0	0	0	0	0	0	0	1	0	0	0	0	0	0	0	0	0	0	30	0	0	0	0	0	0	0	0	0	0	0	0	0	0	0
Mucoromycota	Mucoromycetes	Mucorales	Cunninghamellaceae	Absidia	NM	ITS1_02298	0	0	0	0	0	0	0	0	0	0	0	0	0	0	0	0	0	0	0	0	0	4	0	0	0	0	0	0	0	0	0	0	0	0	0	0	0	0	0	0	0	0	0
Basidiomycota	Agaricomycetes	Russulales	Russulaceae	Russula	EcM	ITS1_02299	0	0	0	0	0	0	0	0	0	0	0	0	0	0	0	0	0	0	0	0	0	0	1	60	0	0	0	0	1	0	0	0	0	0	0	0	0	0	0	0	0	0	0
Ascomycota	Eurotiomycetes	Chaetothyriales	Herpotrichiellaceae		NM	ITS1_02300	0	0	0	0	0	0	0	0	0	0	0	0	0	0	0	0	0	0	25	0	0	3	20	0	0	1	1	8	1	0	0	0	0	1	0	0	0	0	0	0	0	0	0
Basidiomycota	Agaricomycetes	Thelephorales	Thelephoraceae		EcM	ITS1_02301	0	0	0	0	0	0	0	0	0	0	0	0	0	0	0	0	0	50	0	0	0	0	0	0	0	3	2	2	0	0	0	0	0	0	0	0	0	0	0	0	0	0	0
Basidiomycota	Agaricomycetes	Russulales	Russulaceae	Russula	EcM	ITS1_02302	0	0	0	0	0	0	0	0	0	0	0	0	0	0	0	0	11	0	0	0	0	0	0	1	0	40	0	5	2	0	0	0	0	0	0	0	0	0	0	0	0	0	0
Mortierellomycota	Mortierellomycetes	Mortierellales	Mortierellaceae	Mortierella	NM	ITS1_02303	0	0	0	0	0	0	7	0	2	0	0	0	0	4	5	0	0	0	0	0	0	0	0	0	0	0	0	0	0	0	0	0	3	0	0	15	0	23	0	0	0	0	4
Basidiomycota	Agaricomycetes	Sebacinales	Sebacinaceae		EcM	ITS1_02304	0	0	0	0	0	0	0	43	0	1	0	0	0	0	2	0	0	0	0	0	0	0	0	0	0	0	0	0	0	0	0	0	0	0	0	0	17	0	0	0	0	0	0
Basidiomycota	Agaricomycetes	Auriculariales			NM	ITS1_02305	0	0	0	0	0	0	0	0	0	0	0	30	0	0	0	0	0	0	0	0	0	0	0	0	0	0	0	0	0	0	0	0	0	1	0	0	0	0	0	0	33	0	0
Ascomycota	Eurotiomycetes	Chaetothyriales	Herpotrichiellaceae		NM	ITS1_02308	0	0	0	0	0	0	0	41	1	0	0	2	0	0	0	0	0	0	0	0	0	0	0	0	0	0	0	0	0	0	0	0	0	0	0	0	19	0	0	0	0	0	0
Basidiomycota	Agaricomycetes	Cantharellales	Botryobasidiaceae		NM	ITS1_02310	21	0	0	5	0	0	0	0	0	0	0	0	0	0	0	0	0	0	0	0	0	0	0	0	0	5	3	10	0	5	0	0	5	0	0	0	0	0	0	0	0	0	0
Basidiomycota	Agaricomycetes	Cantharellales	Hydnaceae	Sistotrema	NM	ITS1_02311	0	0	0	0	0	0	0	0	0	0	0	0	0	0	0	55	0	0	0	0	0	0	0	0	0	0	0	0	0	0	0	0	0	0	0	0	0	0	0	0	0	0	0
Basidiomycota	Agaricomycetes	Cantharellales	Ceratobasidiaceae		EcM	ITS1_02314	0	0	0	0	0	0	0	0	0	0	0	0	0	0	0	0	0	0	0	0	0	0	0	0	0	0	0	0	0	1	0	0	1	16	2	0	13	0	2	5	20	0	0
Ascomycota	Sordariomycetes	Sordariales			EcM	ITS1_02316	1	0	0	58	0	0	0	0	0	0	0	0	1	0	0	1	0	0	0	0	0	0	0	0	0	0	0	0	0	0	0	0	2	0	0	0	0	0	0	0	0	0	0
Ascomycota	Leotiomycetes	Helotiales			NM	ITS1_02317	0	0	0	0	0	0	0	0	0	0	0	0	0	0	0	9	0	1	0	1	12	0	0	0	0	0	0	0	0	0	0	0	0	0	0	0	0	0	0	0	0	0	0
Ascomycota	Sordariomycetes	Chaetosphaeriales	Chaetosphaeriaceae	Chloridium	NM	ITS1_02319	0	0	0	0	0	0	0	0	0	0	0	0	0	0	0	1	12	4	0	0	2	0	0	0	1	8	33	2	0	0	0	0	0	0	0	0	0	0	0	0	0	0	0
Basidiomycota	Agaricomycetes	Agaricales	Entolomataceae	Entoloma	NM	ITS1_02323	0	0	0	0	0	0	0	0	0	1	0	38	0	0	0	1	0	0	0	0	0	0	0	0	0	0	0	0	0	0	0	0	0	0	0	0	0	0	2	1	18	0	0
Basidiomycota	Agaricomycetes	Agaricales	Pluteaceae	Pluteus	NM	ITS1_02324	2	0	0	0	0	2	3	0	0	0	0	0	0	18	0	0	0	1	0	0	0	0	0	0	0	4	2	0	2	0	0	0	0	0	0	7	0	0	0	0	0	0	17
Basidiomycota	Agaricomycetes	Agaricales	Cortinariaceae		NM	ITS1_02326	0	0	0	0	0	0	0	0	0	0	0	0	4	0	0	0	0	0	0	29	9	0	0	0	0	0	0	0	0	0	0	0	0	0	0	0	0	0	0	0	0	1	0
Ascomycota	Eurotiomycetes	Eurotiales	Elaphomycetaceae	Elaphomyces	EcM	ITS1_02327	0	0	0	0	0	0	0	0	0	0	0	0	0	0	0	0	0	0	0	0	0	0	0	0	0	0	0	0	0	0	0	0	0	0	0	0	0	0	0	0	0	0	0
Basidiomycota	Fungi_other				NM	ITS1_02328	0	0	0	0	0	0	0	0	0	0	0	0	0	0	0	0	0	0	44	0	0	0	0	1	0	0	0	0	0	0	0	0	0	0	0	0	0	0	0	0	0	0	0
Basidiomycota	Agaricomycetes	Cantharellales	Clavulinaceae	Clavulina	EcM	ITS1_02329	0	0	0	0	0	0	0	0	0	0	0	0	0	0	0	0	0	62	0	0	0	0	0	0	0	0	0	0	0	0	0	0	0	0	0	0	0	0	0	0	0	0	0
Basidiomycota	Agaricomycetes	Agaricales	Inocybaceae	Inocybe	EcM	ITS1_02330	0	0	0	0	0	0	0	0	0	0	0	0	0	0	0	0	0	0	0	0	0	0	0	0	0	0	0	0	0	0	0	0	0	0	0	0	0	0	0	0	0	0	0
Mortierellomycota	Mortierellomycetes				NM	ITS1_02331	0	0	0	0	0	0	0	0	0	0	0	0	0	0	0	1	14	5	0	0	0	0	3	0	0	8	0	1	0	0	0	0	0	0	0	0	0	0	0	0	0	0	0
Basidiomycota	Agaricomycetes	Cantharellales	Clavulinaceae	Clavulina	EcM	ITS1_02332	0	0	0	0	0	0	0	35	0	0	0	0	0	0	1	0	0	0	0	0	0	0	0	0	0	0	0	0	0	0	0	0	0	0	0	0	26	0	0	0	0	0	0
Basidiomycota	Agaricomycetes	Russulales	Russulaceae		EcM	ITS1_02333	0	0	0	0	0	0	0	0	0	0	0	0	0	0	0	0	2	1	0	0	0	0	0	0	0	0	53	1	2	0	0	0	0	0	0	0	0	0	0	0	0	0	0
Ascomycota	Eurotiomycetes	Eurotiales	Trichocomaceae	Paecilomyces	NM	ITS1_02334	0	6	3	0	0	0	0	0	0	0	0	0	0	0	0	0	4	0	0	0	0	5	0	0	25	13	6	1	0	0	0	0	0	0	0	0	0	0	0	0	0	0	0
Ascomycota	Eurotiomycetes				NM	ITS1_02335	0	0	0	0	0	0	1	20	0	0	0	0	0	0	0	0	0	0	0	0	0	0	0	0	0	0	0	0	0	0	0	0	0	0	0	1	41	0	0	0	0	0	0
Ascomycota	Eurotiomycetes	Chaetothyriales	Herpotrichiellaceae		NM	ITS1_02336	0	0	0	0	0	0	0	0	0	8	6	47	2	0	0	0	0	0	0	0	0	0	0	0	0	0	0	0	0	0	0	0	0	0	0	0	0	0	0	0	0	0	0
Basidiomycota	Agaricomycetes	Agaricales	Clavariaceae		NM	ITS1_02337	0	0	0	0	0	0	0	0	0	0	0	0	0	0	0	0	0	0	0	0	0	0	0	0	0	0	0	0	52	0	0	0	0	0	0	0	0	0	0	0	0	0	0
Ascomycota	Fungi_other				NM	ITS1_02338	0	0	0	0	0	0	0	0	0	0	0	0	0	0	0	0	0	0	0	0	0	0	0	0	0	3	0	0	0	0	0	0	2	0	0	0	0	0	0	0	0	2	0
Basidiomycota	Agaricomycetes	Thelephorales	Thelephoraceae	Tomentella	EcM	ITS1_02340	0	0	0	4	0	0	0	0	0	0	0	0	0	0	0	0	1	28	0	0	0	0	0	0	3	10	0	15	0	0	0	0	1	0	0	0	0	0	0	0	0	0	0
Ascomycota	Pezizomycetes	Pezizales	Pyronemataceae	Pseudaleuria	NM	ITS1_02341	0	0	0	0	0	1	0	0	0	0	0	0	0	0	0	0	0	1	0	0	0	5	0	0	0	40	0	12	0	0	0	0	0	0	0	0	0	0	0	0	0	0	0
Basidiomycota	Agaricomycetes	Boletales	Boletaceae	Strobilomyces	NM	ITS1_02344	0	0	0	0	0	0	0	0	0	0	0	0	0	0	0	0	0	0	0	0	0	0	0	10	0	0	0	0	1	0	0	0	0	0	0	0	0	0	0	0	0	0	0
Basidiomycota	Agaricomycetes	Agaricales	Inocybaceae	Inocybe	EcM	ITS1_02346	0	0	0	0	0	0	0	0	0	0	0	0	0	0	0	0	0	0	0	0	0	0	0	0	0	0	0	1	39	0	0	0	0	0	0	0	0	0	0	0	0	0	0
Ascomycota	Dothideomycetes	Botryosphaeriales	Botryosphaeriaceae	Microdiplodia	NM	ITS1_02347	0	0	0	0	0	0	1	0	5	0	0	0	0	1	0	0	0	0	0	0	0	0	0	0	0	0	0	0	0	0	0	0	0	3	1	9	1	4	4	2	2	1	27
Mortierellomycota	Mortierellomycetes	Mortierellales	Mortierellaceae	Mortierella	NM	ITS1_02349	3	12	4	22	0	0	0	0	0	0	0	0	0	0	0	1	0	0	0	0	0	0	0	0	0	0	0	0	0	1	5	1	9	1	0	0	0	0	0	0	0	0	0
Ascomycota	Pezizomycetes				NM	ITS1_02351	1	0	0	0	0	0	0	0	0	0	0	0	0	0	47	0	0	0	0	0	0	0	0	0	0	0	0	0	0	0	0	0	0	0	0	0	0	0	0	0	0	0	0
Basidiomycota	Agaricomycetes	Corticiales	Corticiaceae		NM	ITS1_02353	0	0	0	0	0	0	0	0	8	0	0	0	0	0	0	0	0	0	0	0	0	0	0	0	0	0	0	0	0	0	0	0	0	0	0	0	0	54	0	0	0	0	0
Basidiomycota	Agaricomycetes	Cantharellales	Clavulinaceae	Clavulina	EcM	ITS1_02354	0	0	0	1	0	0	0	0	10	0	0	0	0	0	0	0	0	0	0	0	0	0	0	0	0	0	0	0	0	0	0	0	0	0	0	0	0	50	0	0	0	0	0
Basidiomycota	Agaricomycetes	Agaricales	Hydnangiaceae	Laccaria	EcM	ITS1_02355	0	0	0	0	0	0	0	0	0	0	0	0	0	0	0	0	0	0	0	0	0	0	5	0	0	0	0	4	0	0	0	0	0	0	0	0	0	0	0	0	0	0	0
Basidiomycota	Agaricomycetes	Polyporales	Meruliaceae	Cymatoderma	NM	ITS1_02356	0	0	0	0	0	0	5	0	0	0	2	0	0	1	16	0	0	0	0	0	0	0	0	0	0	0	0	0	0	0	0	0	0	0	0	17	0	0	0	0	0	0	0
Basidiomycota	Agaricomycetes	Agaricales			EcM	ITS1_02357	0	0	0	0	0	0	0	0	0	0	0	0	0	0	0	0	0	0	0	0	0	0	1	61	0	0	0	0	0	0	0	0	0	0	0	0	0	0	0	0	0	0	0
Ascomycota	Fungi_other				NM	ITS1_02358	0	0	0	0	0	0	0	0	0	0	0	0	0	0	0	0	2	11	0	0	0	0	2	0	0	14	6	10	0	0	0	0	0	0	0	0	0	0	0	0	0	0	0
Basidiomycota	Agaricomycetes	Agaricales	Entolomataceae	Clitopilus	NM	ITS1_02359	9	0	0	0	18	8	0	0	9	3	4	2	0	3	0	0	0	1	0	0	0	0	0	0	2	1	0	1	0	0	0	0	0	0	0	0	0	0	0	0	0	0	0
Basidiomycota	Agaricomycetes	Sebacinales			NM	ITS1_02360	0	0	0	0	0	0	0	0	0	0	0	0	0	0	0	0	0	0	42	0	0	10	8	0	0	0	0	0	0	0	0	0	0	0	0	0	0	0	0	0	0	0	0
Basidiomycota	Agaricomycetes	Russulales	Russulaceae	Russula	EcM	ITS1_02361	0	0	0	61	0	0	0	0	0	0	0	0	0	0	1	0	0	0	0	0	0	0	0	0	0	0	0	0	0	0	0	0	0	0	0	0	0	0	0	0	0	0	0
Basidiomycota	Agaricomycetes	Russulales	Russulaceae	Russula	EcM	ITS1_02362	0	0	0	52	0	0	0	0	0	0	0	0	0	0	0	0	0	0	0	0	0	0	0	0	0	0	0	0	0	0	0	0	9	0	0	0	0	0	0	0	0	0	0
Ascomycota	Eurotiomycetes	Eurotiales	Trichocomaceae	Penicillium	NM	ITS1_02363	0	0	0	0	0	0	38	2	2	16	0	0	0	0	0	0	4	0	0	0	0	0	0	0	0	0	0	0	0	0	0	0	0	0	0	0	0	0	0	0	0	0	0
Basidiomycota	Agaricomycetes	Sebacinales	Sebacinaceae	Sebacina	EcM	ITS1_02364	0	0	0	0	0	0	0	0	0	0	0	0	0	0	0	0	0	0	0	0	0	0	0	0	0	0	0	1	61	0	0	0	0	0	0	0	0	0	0	0	0	0	0
Ascomycota	Leotiomycetes	Helotiales			NM	ITS1_02365	0	0	0	0	0	0	0	0	0	0	0	0	0	0	0	0	0	0	0	0	0	0	0	0	0	0	0	0	0	0	38	15	0	0	0	0	0	0	0	0	0	0	0
Ascomycota	Dothideomycetes	Venturiales	Venturiaceae		NM	ITS1_02366	0	0	0	0	0	0	0	0	0	0	0	0	0	0	0	0	0	0	0	0	0	0	0	0	0	0	0	0	11	0	0	0	0	0	0	0	0	0	0	0	0	0	0
Basidiomycota	Agaricomycetes	Agaricales	Hygrophoraceae	Hygrocybe	NM	ITS1_02367	0	0	0	0	0	0	0	0	0	0	0	0	0	0	0	13	0	0	38	0	0	0	0	0	0	0	0	1	1	0	0	0	0	0	0	0	0	0	0	0	0	0	0
Basidiomycota	Agaricomycetes	Thelephorales	Thelephoraceae		EcM	ITS1_02368	0	0	0	1	15	17	0	0	0	0	0	0	0	0	1	0	0	0	0	0	0	0	0	0	0	0	0	0	0	0	0	0	0	16	8	0	0	0	0	0	0	0	0
Basidiomycota	Agaricomycetes	Trechisporales			NM	ITS1_02369	0	0	0	0	0	0	0	0	0	0	0	0	0	0	0	0	0	0	52	0	0	0	0	0	0	1	0	0	0	0	0	0	0	0	0	0	0	0	0	0	0	0	0
Basidiomycota	Agaricomycetes	Thelephorales	Thelephoraceae	Tomentella	EcM	ITS1_02370	0	1	0	0	0	0	0	29	0	0	0	0	0	0	0	0	0	0	0	0	0	0	0	0	0	0	0	0	0	0	0	0	0	0	0	0	30	0	0	0	0	0	0
Ascomycota	Eurotiomycetes	Chaetothyriales	Herpotrichiellaceae	Cladophialophora	NM	ITS1_02371	0	0	0	0	24	14	0	0	12	0	0	0	0	0	0	0	0	0	0	0	0	0	0	0	0	0	0	0	0	0	0	0	0	5	3	0	0	3	0	0	0	0	0
Basidiomycota	Agaricomycetes	Thelephorales	Thelephoraceae		EcM	ITS1_02372	0	0	0	1	0	0	0	0	0	0	0	0	0	0	0	0	2	0	0	0	0	11	0	8	1	0	20	1	0	0	0	0	0	0	0	0	0	0	0	0	0	0	0
Ascomycota	Eurotiomycetes	Eurotiales	Trichocomaceae	Penicillium	NM	ITS1_02374	0	0	1	0	0	0	0	0	0	0	0	0	0	0	0	0	15	0	0	0	0	21	0	0	14	0	3	0	0	0	0	0	0	0	0	0	0	0	0	0	0	1	0
Ascomycota	Leotiomycetes	Helotiales			NM	ITS1_02375	0	0	0	0	0	0	0	0	0	0	0	0	0	0	0	0	0	0	0	0	0	0	0	0	0	0	0	0	47	0	0	0	0	0	0	0	0	0	0	0	0	0	0
Basidiomycota	Agaricomycetes	Agaricales	Clavariaceae		NM	ITS1_02376	0	0	0	0	0	0	0	0	0	0	0	0	0	0	0	0	0	0	0	0	0	0	0	0	0	0	0	0	61	0	0	0	0	0	0	0	0	0	0	0	0	0	0
Basidiomycota	Agaricomycetes				NM	ITS1_02378	0	0	0	0	0	0	0	0	0	0	0	0	0	0	0	0	0	10	0	0	0	0	0	0	5	3	1	14	0	0	0	0	6	0	0	0	0	0	0	0	0	0	0
Ascomycota	Leotiomycetes	Helotiales			NM	ITS1_02379	0	0	0	0	0	0	0	0	0	0	0	0	0	0	0	0	14	1	0	5	7	0	1	0	3	9	9	11	0	0	0	0	0	0	0	0	0	0	0	0	0	0	0
Ascomycota	Fungi_other				NM	ITS1_02381	0	0	0	0	0	0	3	0	0	0	0	0	1	1	1	0	4	0	10	1	0	2	0	0	1	0	1	2	1	0	0	0	0	0	0	7	5	0	0	0	0	0	0
Basidiomycota	Agaricomycetes	Russulales	Stephanosporaceae	Lindtneria	NM	ITS1_02386	0	0	0	0	0	0	0	0	0	1	0	28	2	1	0	1	0	0	0	0	0	0	0	0	0	0	0	0	0	0	0	0	0	0	0	0	0	0	0	0	28	0	0
Basidiomycota	Agaricomycetes	Agaricales	Inocybaceae	Inocybe	EcM	ITS1_02387	0	0	0	0	0	0	0	0	0	0	0	0	0	0	0	0	0	0	2	0	0	2	0	0	0	25	0	0	1	0	0	0	0	0	0	0	0	0	0	0	0	0	0
Basidiomycota	Agaricomycetes	Agaricales	Marasmiaceae	Clitocybula	NM	ITS1_02389	0	0	0	0	0	0	0	0	0	0	0	0	0	0	0	0	0	0	0	0	0	0	0	0	0	0	0	0	0	60	0	0	0	1	0	0	0	0	0	0	0	0	0
Basidiomycota	Agaricomycetes	Agaricales	Mycenaceae	Mycena	NM	ITS1_02391	0	0	0	0	0	0	0	0	0	0	0	33	0	1	0	1	0	0	0	0	0	0	0	0	0	0	0	0	0	0	0	0	0	0	0	0	0	0	0	0	26	0	0
Basidiomycota	Agaricomycetes				NM	ITS1_02394	0	6	0	0	0	0	0	0	0	0	0	0	0	0	0	0	0	0	0	0	0	0	0	0	0	0	0	0	0	0	40	15	0	0	0	0	0	0	0	0	0	0	0
Basidiomycota	Agaricomycetes	Agaricales	Mycenaceae	Mycena	NM	ITS1_02395	0	19	9	0	0	0	0	1	0	0	0	0	0	0	0	0	0	1	0	0	0	0	0	0	0	0	0	0	0	0	20	8	0	1	0	0	0	0	0	0	0	0	0
Basidiomycota	Agaricomycetes	Thelephorales	Bankeraceae		EcM	ITS1_02396	0	0	0	0	0	0	0	0	0	0	0	0	0	0	0	0	0	0	0	0	0	0	0	0	0	27	0	0	0	0	0	0	0	0	0	0	0	0	0	0	0	0	0
Basidiomycota	Agaricomycetes	Agaricales	Cortinariaceae	Cortinarius	EcM	ITS1_02397	0	0	0	0	0	0	0	0	0	0	0	0	0	0	0	0	0	0	0	61	0	0	0	0	0	0	0	0	0	0	0	0	0	0	0	0	0	0	0	0	0	0	0
Basidiomycota	Agaricomycetes	Russulales	Russulaceae	Russula	EcM	ITS1_02398	0	0	0	0	0	0	0	0	0	0	0	0	0	0	0	0	0	0	0	0	0	0	0	1	0	21	0	2	0	0	0	0	0	0	0	0	0	0	0	0	0	0	0
Basidiomycota	Agaricomycetes	Atheliales	Atheliaceae		EcM	ITS1_02399	0	0	0	0	0	0	0	0	0	0	0	0	0	0	0	0	0	0	0	0	0	0	0	0	0	0	0	0	0	0	0	0	0	0	0	0	0	0	0	0	0	0	0
Basidiomycota	Agaricomycetes	Thelephorales	Thelephoraceae		EcM	ITS1_02400	0	0	0	0	0	0	0	0	0	0	0	0	0	0	0	0	0	0	0	0	0	0	0	1	0	0	0	0	46	0	0	0	0	0	0	0	0	0	0	0	0	0	0
Basidiomycota	Agaricomycetes	Thelephorales	Thelephoraceae	Tomentella	EcM	ITS1_02401	0	0	0	0	0	0	0	0	0	0	0	0	0	0	0	0	0	2	0	0	0	0	0	58	0	0	0	1	0	0	0	0	0	0	0	0	0	0	0	0	0	0	0
Basidiomycota	Agaricomycetes	Russulales	Russulaceae	Russula	EcM	ITS1_02402	0	0	0	0	0	0	0	0	0	0	0	0	0	0	0	0	0	60	0	0	0	0	0	0	0	0	0	0	1	0	0	0	0	0	0	0	0	0	0	0	0	0	0
Ascomycota	Eurotiomycetes	Chaetothyriales			NM	ITS1_02403	0	0	0	0	0	0	0	1	0	0	0	0	0	49	0	0	0	0	0	0	0	0	0	0	0	0	0	0	0	0	0	0	0	0	0	0	4	0	0	0	0	0	7
Ascomycota	Sordariomycetes	Hypocreales	Clavicipitaceae		NM	ITS1_02404	0	0	0	0	0	0	0	0	0	0	0	0	1	0	0	0	12	0	0	0	0	2	1	0	8	7	29	0	0	0	0	0	0	0	0	0	0	0	0	0	0	0	0
Ascomycota	Eurotiomycetes	Eurotiales	Trichocomaceae	Penicillium	NM	ITS1_02405	4	0	0	1	2	1	0	1	0	16	16	0	6	0	2	0	4	0	0	0	0	0	0	0	1	4	2	0	0	0	0	0	0	0	0	0	0	0	0	0	0	0	0
Basidiomycota	Agaricomycetes	Cantharellales	Clavulinaceae	Clavulina	EcM	ITS1_02407	0	0	0	0	0	0	0	0	0	0	0	0	0	0	0	0	0	0	0	0	1	0	41	0	1	0	3	1	0	0	0	0	0	0	0	0	0	0	0	0	0	0	0
Ascomycota	Eurotiomycetes	Chaetothyriales	Herpotrichiellaceae		NM	ITS1_02410	0	0	0	0	0	0	0	0	0	0	0	0	0	0	0	0	0	0	0	0	0	0	0	0	0	0	0	0	0	0	45	12	2	0	0	0	1	0	0	0	0	0	0
Basidiomycota	Agaricomycetes	Agaricales	Clavariaceae		NM	ITS1_02412	2	0	0	0	11	1	5	0	8	0	0	0	0	0	0	0	0	0	0	0	0	0	0	13	0	0	0	0	1	0	0	0	0	12	2	2	0	0	0	0	0	0	0
Basidiomycota	Agaricomycetes	Polyporales	Polyporaceae		NM	ITS1_02414	3	8	0	9	0	0	0	0	0	0	0	2	0	18	1	0	0	0	0	0	0	0	0	0	0	0	0	0	0	4	1	1	1	0	0	0	0	0	1	0	1	0	10
Basidiomycota	Agaricomycetes	Boletales	Boletaceae	Rossbeevera	EcM	ITS1_02415	0	0	0	0	0	0	0	0	0	0	0	0	0	0	0	2	1	33	0	0	0	0	0	0	0	0	0	0	0	0	0	0	0	0	0	0	0	0	0	0	0	0	0
Ascomycota	Eurotiomycetes	Eurotiales	Trichocomaceae	Penicillium	NM	ITS1_02416	0	0	0	0	0	0	0	0	0	0	0	0	0	0	0	0	1	0	0	0	0	0	0	0	0	0	0	0	0	0	0	0	0	0	0	0	0	0	0	0	0	0	0
Ascomycota	Leotiomycetes	Helotiales			NM	ITS1_02418	0	0	0	0	0	0	0	0	0	0	0	0	0	0	0	0	0	0	34	0	0	0	0	0	0	0	0	0	3	0	0	0	0	0	0	0	0	0	0	0	0	0	0
Basidiomycota	Agaricomycetes	Agaricales	Inocybaceae	Inocybe	EcM	ITS1_02423	0	0	0	0	0	1	0	0	0	0	0	0	0	0	0	0	0	0	0	0	0	0	0	0	0	0	32	2	2	0	0	0	0	0	0	0	0	0	0	0	0	0	0
Basidiomycota	Agaricomycetes	Agaricales	Cortinariaceae	Cortinarius	EcM	ITS1_02424	0	0	0	0	33	20	0	0	0	0	1	1	0	0	0	0	0	0	0	0	1	0	1	0	0	0	0	1	1	0	0	0	0	0	0	0	0	0	0	0	0	0	0
Basidiomycota	Agaricomycetes	Agaricales	Marasmiaceae	Clitocybula	NM	ITS1_02425	0	0	0	0	0	0	0	0	0	0	0	22	0	0	1	0	0	0	0	0	0	0	0	0	0	0	0	0	0	0	0	0	1	0	0	0	0	0	0	5	30	1	0
Basidiomycota	Agaricomycetes				NM	ITS1_02428	0	14	3	1	0	0	0	0	0	0	0	0	0	0	0	21	0	0	0	0	1	0	0	0	0	0	0	0	0	0	7	0	0	0	0	0	0	0	0	0	0	0	0
Basidiomycota	Agaricomycetes	Russulales	Russulaceae	Russula	EcM	ITS1_02429	0	0	0	0	0	0	0	0	0	0	0	0	0	0	0	0	0	0	0	0	0	0	0	0	0	0	0	60	0	0	0	0	0	0	0	0	0	0	0	0	0	0	0
Basidiomycota	Agaricomycetes	Sebacinales			NM	ITS1_02430	0	0	0	0	0	0	0	0	0	0	0	0	0	48	0	0	0	0	0	0	0	0	0	0	0	0	0	0	0	0	0	0	0	0	0	0	0	0	0	0	0	0	12
Basidiomycota	Agaricomycetes	Russulales	Russulaceae	Russula	EcM	ITS1_02431	0	0	0	0	0	1	0	0	0	0	0	0	0	0	0	0	0	0	0	0	0	0	0	38	0	0	0	0	0	0	0	0	0	0	0	0	0	0	0	0	0	0	0
Basidiomycota	Agaricomycetes	Agaricales	Hygrophoraceae	Hygrocybe	NM	ITS1_02432	0	0	0	0	0	0	0	59	0	0	0	1	0	0	0	0	0	0	0	0	0	0	0	0	0	0	0	0	0	0	0	0	0	0	0	0	0	0	0	0	0	0	0
Basidiomycota	Agaricomycetes	Thelephorales	Thelephoraceae		EcM	ITS1_02433	0	0	0	4	0	0	0	0	0	0	0	0	0	0	0	0	0	0	0	0	0	0	0	0	0	0	1	54	1	0	0	0	0	0	0	0	0	0	0	0	0	0	0
Basidiomycota	Agaricomycetes	Russulales	Russulaceae		EcM	ITS1_02434	0	0	0	0	0	0	0	0	0	0	0	0	0	0	0	0	0	12	0	0	0	0	0	3	0	0	1	44	0	0	0	0	0	0	0	0	0	0	0	0	0	0	0
Basidiomycota	Fungi_other				NM	ITS1_02435	0	0	0	0	0	0	0	0	0	0	0	0	0	0	0	47	3	2	7	0	0	0	0	0	0	0	1	0	0	0	0	0	0	0	0	0	0	0	0	0	0	0	0
Ascomycota	Eurotiomycetes	Chaetothyriales			NM	ITS1_02436	0	0	0	0	0	1	0	0	0	0	0	0	0	0	0	15	1	0	18	0	0	0	0	0	0	20	1	1	0	0	0	0	0	0	0	0	0	0	0	0	0	0	0
Ascomycota	Fungi_other				NM	ITS1_02437	0	0	0	0	18	9	0	32	0	0	0	0	0	0	0	1	0	0	0	0	0	0	0	0	0	0	0	0	0	0	0	0	0	0	0	0	0	0	0	0	0	0	0
Ascomycota	Dothideomycetes	Pleosporales			NM	ITS1_02438	0	0	0	0	0	0	0	57	0	0	1	0	0	0	0	0	0	0	0	0	0	0	0	0	0	0	0	0	0	0	0	0	0	0	0	0	1	0	0	0	0	0	0
Basidiomycota	Agaricomycetes	Agaricales	Hygrophoraceae	Hygrocybe	NM	ITS1_02439	0	0	0	0	0	0	0	0	0	0	0	0	0	1	1	22	0	0	0	0	0	0	0	0	0	0	0	0	0	0	0	0	0	0	0	0	0	0	0	0	0	0	0
Basidiomycota	Agaricomycetes	Thelephorales	Thelephoraceae	Tomentella	EcM	ITS1_02440	0	0	0	0	0	0	0	0	0	0	0	0	0	0	0	0	0	2	0	0	0	22	26	0	0	0	0	0	0	0	0	0	0	0	0	0	1	0	0	0	0	0	0
Basidiomycota	Fungi_other				NM	ITS1_02441	0	0	0	0	0	0	0	0	0	0	0	0	0	0	1	57	0	0	0	0	0	0	0	0	0	0	0	0	0	0	0	0	0	0	0	0	0	0	0	0	0	0	0
Ascomycota	Fungi_other				NM	ITS1_02444	0	0	0	0	0	0	0	0	0	0	0	0	0	0	0	36	0	0	0	0	0	0	0	0	0	0	0	0	0	0	0	0	1	0	0	0	0	0	0	0	0	1	0
Ascomycota	Leotiomycetes	Rhytismatales	Rhytismataceae	Coccomyces	NM	ITS1_02446	0	0	0	0	0	0	0	0	0	0	0	0	0	0	0	0	0	0	0	59	0	0	0	0	0	0	0	0	0	0	0	0	0	0	0	0	0	0	0	0	0	0	0
Basidiomycota	Agaricomycetes	Agaricales	Entolomataceae	Entoloma	NM	ITS1_02448	0	19	8	0	0	0	0	0	0	0	0	0	0	0	0	0	0	0	0	0	0	0	0	0	0	0	0	1	1	0	18	11	0	0	0	0	0	0	0	0	0	0	0
Basidiomycota	Agaricomycetes	Boletales	Boletaceae		EcM	ITS1_02449	0	0	0	0	0	0	0	0	0	0	0	0	0	0	0	0	16	4	0	0	0	0	0	10	1	0	6	0	1	0	0	0	0	0	0	0	0	0	0	0	0	0	0
Basidiomycota	Agaricomycetes	Agaricales	Entolomataceae	Entoloma	NM	ITS1_02452	0	0	0	0	0	0	0	0	0	0	0	0	0	0	25	0	0	0	0	0	0	0	0	0	0	0	0	0	0	0	0	0	0	0	0	0	0	0	0	0	0	0	0
Basidiomycota	Agaricomycetes	Agaricales	Cortinariaceae	Cortinarius	EcM	ITS1_02454	0	0	0	0	0	0	0	0	0	0	0	0	0	0	0	0	0	0	0	0	0	1	0	0	0	0	0	1	57	0	0	0	0	0	0	0	0	0	0	0	0	0	0
Basidiomycota	Agaricomycetes	Agaricales	Inocybaceae	Inocybe	EcM	ITS1_02455	0	0	0	0	0	0	0	0	0	0	0	0	0	0	0	0	0	0	0	0	0	0	0	0	0	0	0	0	0	0	0	0	0	0	0	0	0	13	0	0	0	0	0
Basidiomycota	Agaricomycetes			Cyphellostereum	NM	ITS1_02456	0	0	0	0	0	0	0	0	0	0	0	0	0	0	0	0	0	0	46	0	0	0	0	0	0	0	0	0	0	0	0	0	0	0	0	0	0	0	0	0	0	0	0
Ascomycota	Eurotiomycetes				NM	ITS1_02457	0	0	0	0	0	0	1	0	0	1	0	0	0	0	0	0	0	0	0	0	0	0	0	0	0	0	0	0	0	0	0	0	0	0	0	55	2	0	0	0	0	0	0
Basidiomycota	Agaricomycetes	Sebacinales	Serendipitaceae		NM	ITS1_02459	0	0	0	0	0	0	0	1	0	0	0	0	57	0	0	0	0	0	0	0	0	0	0	0	0	0	0	0	0	0	0	0	0	0	0	0	0	0	0	0	0	1	0
Basidiomycota	Agaricomycetes	Russulales	Russulaceae	Russula	EcM	ITS1_02460	0	0	0	0	0	0	0	0	0	0	0	0	0	0	0	0	0	0	0	0	0	0	0	0	0	0	0	58	1	0	0	0	0	0	0	0	0	0	0	0	0	0	0
Ascomycota	Pezizomycetes	Pezizales	Pezizaceae		NM	ITS1_02461	0	0	0	0	0	0	32	0	0	0	0	0	0	0	0	0	0	0	0	0	0	0	0	0	0	0	0	0	0	0	0	0	0	0	0	26	0	0	0	0	0	0	0
Basidiomycota	Agaricomycetes	Russulales	Russulaceae	Lactarius	EcM	ITS1_02462	0	0	0	0	0	0	0	0	0	0	0	0	0	0	0	0	0	2	0	0	0	0	0	0	0	0	0	0	0	0	0	0	55	0	0	0	0	0	0	0	0	0	0
Basidiomycota	Agaricomycetes	Thelephorales	Thelephoraceae		EcM	ITS1_02463	0	0	0	0	0	0	0	0	0	0	0	0	0	0	0	0	0	0	0	40	17	0	0	1	0	0	0	0	0	0	0	0	0	0	0	0	0	0	0	0	0	0	0
Ascomycota	Dothideomycetes	Pleosporales			NM	ITS1_02464	1	0	0	1	0	0	50	0	1	0	1	0	0	0	0	0	0	0	0	0	0	0	0	0	0	0	0	0	0	0	0	0	0	0	0	5	0	0	0	0	0	0	0
Ascomycota	Sordariomycetes	Hypocreales	Hypocreaceae	Trichoderma	NM	ITS1_02465	9	3	0	5	0	3	17	10	1	3	2	4	1	0	0	1	0	0	0	0	0	0	0	0	0	0	0	0	0	0	0	0	0	0	0	0	0	0	0	0	0	0	0
Ascomycota	Eurotiomycetes	Chaetothyriales	Herpotrichiellaceae		NM	ITS1_02466	0	0	0	5	0	0	0	0	0	0	0	0	0	0	0	0	0	0	0	0	0	0	1	0	0	1	1	18	0	0	12	3	5	0	0	0	0	0	0	0	0	0	0
Mortierellomycota	Mortierellomycetes	Mortierellales	Mortierellaceae	Mortierella	NM	ITS1_02467	48	0	0	0	0	0	0	0	0	0	0	0	0	0	0	1	0	0	0	0	0	0	0	0	0	0	0	0	0	8	0	0	0	0	0	0	0	0	0	0	0	0	0
Ascomycota	Dothideomycetes				NM	ITS1_02468	0	0	0	0	0	0	0	0	0	3	20	13	6	0	1	0	0	0	0	0	0	0	0	0	0	0	0	0	0	0	0	0	0	0	0	0	0	0	6	4	5	1	0
Basidiomycota	Agaricomycetes	Cantharellales	Clavulinaceae		EcM	ITS1_02469	0	0	0	0	0	0	0	0	0	0	0	0	0	0	0	0	0	0	0	0	0	0	0	1	0	1	34	0	1	0	0	0	0	0	0	0	0	0	0	0	0	0	0
Basidiomycota	Fungi_other				NM	ITS1_02470	0	0	0	0	0	0	50	1	0	0	1	0	0	0	0	0	0	0	0	0	0	0	0	0	0	0	0	0	0	0	0	0	0	0	0	5	0	0	0	0	0	0	0
Basidiomycota	Agaricomycetes	Russulales	Russulaceae	Russula	EcM	ITS1_02471	0	0	0	0	0	0	0	0	0	0	0	0	0	0	0	0	0	0	0	0	0	0	0	0	0	0	0	0	0	0	0	0	0	0	0	0	0	0	13	24	9	12	0
Basidiomycota	Agaricomycetes	Russulales	Russulaceae	Russula	EcM	ITS1_02474	0	0	0	0	0	0	0	0	0	0	0	0	0	0	0	0	0	0	0	0	0	0	0	0	0	0	0	0	0	0	0	0	1	43	14	0	0	0	0	0	0	0	0
Ascomycota	Saccharomycetes	Saccharomycetales			NM	ITS1_02475	16	0	0	0	0	1	0	0	1	0	1	0	0	0	0	1	0	0	0	0	0	0	0	0	3	0	0	1	0	27	0	0	0	0	0	0	0	0	0	0	0	0	0
Ascomycota	Leotiomycetes	Helotiales			NM	ITS1_02476	0	0	0	0	0	0	0	0	0	0	0	0	0	0	0	0	0	0	0	0	0	3	16	4	0	0	0	0	0	0	0	0	0	0	0	0	0	0	0	0	0	1	0
Ascomycota	Leotiomycetes	Helotiales	Helotiaceae	Meliniomyces	NM	ITS1_02479	0	0	0	2	0	0	0	0	0	0	0	0	2	0	0	0	2	18	1	2	0	0	0	1	1	3	1	4	0	0	0	0	3	0	0	0	0	0	0	0	0	1	0
Basidiomycota	Agaricomycetes	Agaricales	Cortinariaceae	Cortinarius	EcM	ITS1_02481	0	0	0	0	0	0	0	0	0	0	0	0	0	0	0	0	0	1	0	34	13	0	0	0	0	0	0	0	0	0	0	0	0	0	0	0	0	0	0	0	0	0	0
Basidiomycota	Agaricomycetes	Agaricales	Hydnangiaceae		EcM	ITS1_02482	0	0	0	0	0	0	0	0	0	0	0	0	0	0	0	0	11	10	0	0	0	5	0	1	0	0	1	1	0	0	0	0	0	0	0	0	0	0	0	0	0	0	0
Basidiomycota	Agaricomycetes	Agaricales			NM	ITS1_02483	0	0	0	0	0	0	0	0	0	1	0	24	0	0	0	0	0	0	0	0	0	0	0	0	0	0	0	0	0	0	0	0	0	0	0	0	1	0	0	1	31	0	0
Ascomycota	Pezizomycetes	Pezizales	Sarcosomataceae	Plectania	NM	ITS1_02484	0	0	0	0	0	0	0	0	0	0	0	0	0	0	0	0	0	0	0	0	0	0	0	0	0	0	0	0	23	0	0	0	0	0	0	0	0	0	0	0	0	0	0
Ascomycota	Sordariomycetes	Xylariales	Apiosporaceae	Arthrinium	NM	ITS1_02486	0	0	0	0	0	0	0	0	0	0	0	0	0	0	0	4	11	2	0	0	0	0	0	0	0	0	19	21	0	0	0	0	0	0	0	0	0	0	0	0	0	0	0
Ascomycota	Dothideomycetes	Venturiales	Sympoventuriaceae	Scolecobasidium	NM	ITS1_02487	0	4	1	0	0	0	0	0	0	0	0	0	0	0	0	1	17	6	0	1	0	0	0	2	10	1	1	2	0	0	2	0	1	0	0	0	0	0	1	0	0	0	0
Basidiomycota	Agaricomycetes	Russulales	Russulaceae	Russula	EcM	ITS1_02488	0	0	0	0	0	1	0	22	0	0	0	1	0	0	0	1	0	0	0	0	0	0	0	0	0	0	0	0	0	0	0	0	2	0	0	0	31	0	0	0	0	0	0
Basidiomycota	Agaricomycetes	Thelephorales	Thelephoraceae		EcM	ITS1_02489	0	0	0	0	0	0	0	0	0	0	0	0	0	0	0	0	0	0	0	0	0	0	0	0	0	0	1	0	41	0	0	0	0	0	0	0	0	0	0	0	0	0	0
Basidiomycota	Agaricomycetes	Thelephorales	Thelephoraceae	Tomentella	EcM	ITS1_02490	0	0	0	35	0	0	0	0	0	0	0	0	0	0	1	0	1	7	0	0	0	0	0	0	0	2	1	7	0	0	0	0	1	0	0	0	0	0	0	0	0	0	0
Basidiomycota	Agaricomycetes	Sebacinales	Serendipitaceae		NM	ITS1_02491	0	0	0	0	0	0	0	0	0	0	0	0	0	0	0	0	0	0	0	0	0	0	50	0	0	0	0	0	0	0	0	0	0	0	0	0	0	0	0	0	0	0	0
Ascomycota	Sordariomycetes	Sordariales		Ascotaiwania	NM	ITS1_02492	0	0	0	1	0	0	0	0	0	0	0	0	0	0	0	56	1	0	0	0	0	0	0	0	0	0	0	0	0	0	0	0	0	0	0	0	0	0	0	0	0	0	0
Basidiomycota	Agaricomycetes	Trechisporales			NM	ITS1_02493	12	0	0	41	0	0	0	0	2	0	0	0	1	1	0	0	0	0	0	0	0	0	0	0	0	0	0	1	0	0	0	0	0	0	0	0	0	0	0	0	0	0	0
Ascomycota	Fungi_other				NM	ITS1_02495	0	0	0	1	0	0	32	0	12	0	0	1	0	0	0	0	0	0	1	0	0	0	0	8	0	0	0	0	0	0	0	0	0	0	0	3	0	0	0	0	0	0	0
Basidiomycota	Agaricomycetes	Agaricales	Clavariaceae		NM	ITS1_02496	0	0	0	0	0	0	0	0	0	0	0	0	0	16	1	0	0	0	0	0	0	0	0	0	0	0	0	0	0	0	0	0	0	0	0	0	0	0	0	0	0	0	41
Ascomycota	Lecanoromycetes				NM	ITS1_02497	0	0	0	0	0	0	0	0	0	0	0	0	0	0	0	0	0	0	0	0	0	0	0	0	0	0	0	0	55	0	0	0	0	0	0	0	0	0	0	0	0	0	0
Basidiomycota	Agaricomycetes	Thelephorales	Thelephoraceae		EcM	ITS1_02499	0	0	0	42	1	0	0	0	0	0	0	0	0	0	0	0	0	0	0	0	0	0	0	0	0	0	0	3	0	0	0	0	9	0	0	0	0	0	0	0	0	0	0
Basidiomycota	Agaricomycetes	Thelephorales	Thelephoraceae	Tomentella	EcM	ITS1_02500	0	0	0	0	0	0	0	0	0	0	0	0	0	0	0	0	0	0	0	0	0	0	0	0	0	9	23	2	2	0	0	0	0	0	0	0	0	0	0	0	0	0	0
Basidiomycota	Agaricomycetes	Sebacinales	Sebacinaceae		EcM	ITS1_02501	0	0	0	36	0	0	0	0	0	0	0	0	1	0	0	0	0	0	0	0	0	0	0	0	0	0	0	0	0	0	0	0	19	0	0	0	0	0	0	0	0	0	0
Ascomycota	Eurotiomycetes	Chaetothyriales			NM	ITS1_02502	0	0	0	0	0	1	2	0	0	0	0	0	0	11	0	0	0	0	0	0	0	0	0	0	0	0	0	0	0	1	0	0	0	10	3	4	10	8	0	0	0	0	6
Basidiomycota	Agaricomycetes	Agaricales	Hygrophoraceae	Hygrocybe	NM	ITS1_02503	0	0	0	0	0	0	0	0	0	0	0	0	0	0	0	0	0	0	0	0	0	0	0	0	0	0	0	0	0	0	0	0	0	0	0	0	57	0	0	0	0	0	0
Basidiomycota	Agaricomycetes	Sebacinales			NM	ITS1_02504	0	0	0	0	0	0	0	0	0	0	0	0	38	0	0	0	0	0	0	0	0	0	0	0	0	0	0	0	0	0	0	0	0	0	0	0	0	0	0	0	0	18	1
[truncated: 13,251 more rows]
[truncated: 15 more columns]
